# Supplementary material
Source: ML conference proceedings conference paper supplement (https://proceedings.neurips.cc/paper_files/paper/2021/hash/d367eef13f90793bd8121e2f675f0dc2-Abstract.html)
Supplement: Supplementary file 1 [file d367eef13f90793bd8121e2f675f0dc2-Supplemental.zip]

Archive with 878 entries (799 files):
- Scallop-Supplementary-camera-ready/
- __MACOSX/._Scallop-Supplementary-camera-ready
- Scallop-Supplementary-camera-ready/.DS_Store
- __MACOSX/Scallop-Supplementary-camera-ready/._.DS_Store
- Scallop-Supplementary-camera-ready/Scallop_NeurIPs-13.pdf
- __MACOSX/Scallop-Supplementary-camera-ready/._Scallop_NeurIPs-13.pdf
- Scallop-Supplementary-camera-ready/code/
- __MACOSX/Scallop-Supplementary-camera-ready/._code
- Scallop-Supplementary-camera-ready/appendix.pdf
- __MACOSX/Scallop-Supplementary-camera-ready/._appendix.pdf
- Scallop-Supplementary-camera-ready/code/.DS_Store
- __MACOSX/Scallop-Supplementary-camera-ready/code/._.DS_Store
- Scallop-Supplementary-camera-ready/code/scallop/
- __MACOSX/Scallop-Supplementary-camera-ready/code/._scallop
- Scallop-Supplementary-camera-ready/code/README.md
- __MACOSX/Scallop-Supplementary-camera-ready/code/._README.md
- Scallop-Supplementary-camera-ready/code/VQAR-launcher/
- __MACOSX/Scallop-Supplementary-camera-ready/code/._VQAR-launcher
- Scallop-Supplementary-camera-ready/code/tch-rs/
- __MACOSX/Scallop-Supplementary-camera-ready/code/._tch-rs
- Scallop-Supplementary-camera-ready/code/scallop/Cargo.toml
- __MACOSX/Scallop-Supplementary-camera-ready/code/scallop/._Cargo.toml
- Scallop-Supplementary-camera-ready/code/scallop/rustfmt.toml
- __MACOSX/Scallop-Supplementary-camera-ready/code/scallop/._rustfmt.toml
- Scallop-Supplementary-camera-ready/code/scallop/laboratory/
- __MACOSX/Scallop-Supplementary-camera-ready/code/scallop/._laboratory
- Scallop-Supplementary-camera-ready/code/scallop/runtime/
- __MACOSX/Scallop-Supplementary-camera-ready/code/scallop/._runtime
- Scallop-Supplementary-camera-ready/code/scallop/codegen/
- __MACOSX/Scallop-Supplementary-camera-ready/code/scallop/._codegen
- Scallop-Supplementary-camera-ready/code/scallop/readme.md
- __MACOSX/Scallop-Supplementary-camera-ready/code/scallop/._readme.md
- Scallop-Supplementary-camera-ready/code/scallop/.gitignore
- __MACOSX/Scallop-Supplementary-camera-ready/code/scallop/._.gitignore
- Scallop-Supplementary-camera-ready/code/scallop/examples/
- __MACOSX/Scallop-Supplementary-camera-ready/code/scallop/._examples
- Scallop-Supplementary-camera-ready/code/scallop/compiler/
- __MACOSX/Scallop-Supplementary-camera-ready/code/scallop/._compiler
- Scallop-Supplementary-camera-ready/code/VQAR-launcher/compile_scallop.sh
- __MACOSX/Scallop-Supplementary-camera-ready/code/VQAR-launcher/._compile_scallop.sh
- Scallop-Supplementary-camera-ready/code/VQAR-launcher/install_rust.sh
- __MACOSX/Scallop-Supplementary-camera-ready/code/VQAR-launcher/._install_rust.sh
- Scallop-Supplementary-camera-ready/code/VQAR-launcher/README.md
- __MACOSX/Scallop-Supplementary-camera-ready/code/VQAR-launcher/._README.md
- Scallop-Supplementary-camera-ready/code/VQAR-launcher/.gitignore
- __MACOSX/Scallop-Supplementary-camera-ready/code/VQAR-launcher/._.gitignore
- Scallop-Supplementary-camera-ready/code/VQAR-launcher/download.sh
- __MACOSX/Scallop-Supplementary-camera-ready/code/VQAR-launcher/._download.sh
- Scallop-Supplementary-camera-ready/code/VQAR-launcher/conda_env.sh
- __MACOSX/Scallop-Supplementary-camera-ready/code/VQAR-launcher/._conda_env.sh
- Scallop-Supplementary-camera-ready/code/tch-rs/Cargo.toml
- __MACOSX/Scallop-Supplementary-camera-ready/code/tch-rs/._Cargo.toml
- Scallop-Supplementary-camera-ready/code/tch-rs/LICENSE-APACHE
- __MACOSX/Scallop-Supplementary-camera-ready/code/tch-rs/._LICENSE-APACHE
- Scallop-Supplementary-camera-ready/code/tch-rs/rustfmt.toml
- __MACOSX/Scallop-Supplementary-camera-ready/code/tch-rs/._rustfmt.toml
- Scallop-Supplementary-camera-ready/code/tch-rs/Makefile
- __MACOSX/Scallop-Supplementary-camera-ready/code/tch-rs/._Makefile
- Scallop-Supplementary-camera-ready/code/tch-rs/torch-sys/
- __MACOSX/Scallop-Supplementary-camera-ready/code/tch-rs/._torch-sys
- Scallop-Supplementary-camera-ready/code/tch-rs/tests/
- __MACOSX/Scallop-Supplementary-camera-ready/code/tch-rs/._tests
- Scallop-Supplementary-camera-ready/code/tch-rs/gen/
- __MACOSX/Scallop-Supplementary-camera-ready/code/tch-rs/._gen
- Scallop-Supplementary-camera-ready/code/tch-rs/README.md
- __MACOSX/Scallop-Supplementary-camera-ready/code/tch-rs/._README.md
- Scallop-Supplementary-camera-ready/code/tch-rs/.cargo/
- __MACOSX/Scallop-Supplementary-camera-ready/code/tch-rs/._.cargo
- Scallop-Supplementary-camera-ready/code/tch-rs/dune-project
- __MACOSX/Scallop-Supplementary-camera-ready/code/tch-rs/._dune-project
- Scallop-Supplementary-camera-ready/code/tch-rs/third_party/
- __MACOSX/Scallop-Supplementary-camera-ready/code/tch-rs/._third_party
- Scallop-Supplementary-camera-ready/code/tch-rs/.gitignore
- __MACOSX/Scallop-Supplementary-camera-ready/code/tch-rs/._.gitignore
- Scallop-Supplementary-camera-ready/code/tch-rs/examples/
- __MACOSX/Scallop-Supplementary-camera-ready/code/tch-rs/._examples
- Scallop-Supplementary-camera-ready/code/tch-rs/.github/
- __MACOSX/Scallop-Supplementary-camera-ready/code/tch-rs/._.github
- Scallop-Supplementary-camera-ready/code/tch-rs/clippy.toml
- __MACOSX/Scallop-Supplementary-camera-ready/code/tch-rs/._clippy.toml
- Scallop-Supplementary-camera-ready/code/tch-rs/LICENSE-MIT
- __MACOSX/Scallop-Supplementary-camera-ready/code/tch-rs/._LICENSE-MIT
- Scallop-Supplementary-camera-ready/code/tch-rs/src/
- __MACOSX/Scallop-Supplementary-camera-ready/code/tch-rs/._src
- Scallop-Supplementary-camera-ready/code/scallop/laboratory/interpreter/
- __MACOSX/Scallop-Supplementary-camera-ready/code/scallop/laboratory/._interpreter
- Scallop-Supplementary-camera-ready/code/scallop/laboratory/mnist-exp/
- __MACOSX/Scallop-Supplementary-camera-ready/code/scallop/laboratory/._mnist-exp
- Scallop-Supplementary-camera-ready/code/scallop/laboratory/sdd/
- __MACOSX/Scallop-Supplementary-camera-ready/code/scallop/laboratory/._sdd
- Scallop-Supplementary-camera-ready/code/scallop/laboratory/profiler/
- __MACOSX/Scallop-Supplementary-camera-ready/code/scallop/laboratory/._profiler
- Scallop-Supplementary-camera-ready/code/scallop/runtime/Cargo.toml
- __MACOSX/Scallop-Supplementary-camera-ready/code/scallop/runtime/._Cargo.toml
- Scallop-Supplementary-camera-ready/code/scallop/runtime/tests/
- __MACOSX/Scallop-Supplementary-camera-ready/code/scallop/runtime/._tests
- Scallop-Supplementary-camera-ready/code/scallop/runtime/examples/
- __MACOSX/Scallop-Supplementary-camera-ready/code/scallop/runtime/._examples
- Scallop-Supplementary-camera-ready/code/scallop/runtime/src/
- __MACOSX/Scallop-Supplementary-camera-ready/code/scallop/runtime/._src
- Scallop-Supplementary-camera-ready/code/scallop/codegen/Cargo.toml
- __MACOSX/Scallop-Supplementary-camera-ready/code/scallop/codegen/._Cargo.toml
- Scallop-Supplementary-camera-ready/code/scallop/codegen/examples/
- __MACOSX/Scallop-Supplementary-camera-ready/code/scallop/codegen/._examples
- Scallop-Supplementary-camera-ready/code/scallop/codegen/src/
- __MACOSX/Scallop-Supplementary-camera-ready/code/scallop/codegen/._src
- Scallop-Supplementary-camera-ready/code/scallop/examples/sudoku4x4.scl
- __MACOSX/Scallop-Supplementary-camera-ready/code/scallop/examples/._sudoku4x4.scl
- Scallop-Supplementary-camera-ready/code/scallop/examples/sum2.scl
- __MACOSX/Scallop-Supplementary-camera-ready/code/scallop/examples/._sum2.scl
- Scallop-Supplementary-camera-ready/code/scallop/examples/vqar-small-example.scl
- __MACOSX/Scallop-Supplementary-camera-ready/code/scallop/examples/._vqar-small-example.scl
- Scallop-Supplementary-camera-ready/code/scallop/examples/sanity/
- __MACOSX/Scallop-Supplementary-camera-ready/code/scallop/examples/._sanity
- Scallop-Supplementary-camera-ready/code/scallop/examples/drop/
- __MACOSX/Scallop-Supplementary-camera-ready/code/scallop/examples/._drop
- Scallop-Supplementary-camera-ready/code/scallop/examples/.gitignore
- __MACOSX/Scallop-Supplementary-camera-ready/code/scallop/examples/._.gitignore
- Scallop-Supplementary-camera-ready/code/scallop/examples/student-enroll.scl
- __MACOSX/Scallop-Supplementary-camera-ready/code/scallop/examples/._student-enroll.scl
- Scallop-Supplementary-camera-ready/code/scallop/examples/head-is-fact.scl
- __MACOSX/Scallop-Supplementary-camera-ready/code/scallop/examples/._head-is-fact.scl
- Scallop-Supplementary-camera-ready/code/scallop/examples/type_check/
- __MACOSX/Scallop-Supplementary-camera-ready/code/scallop/examples/._type_check
- Scallop-Supplementary-camera-ready/code/scallop/examples/path.scl
- __MACOSX/Scallop-Supplementary-camera-ready/code/scallop/examples/._path.scl
- Scallop-Supplementary-camera-ready/code/scallop/examples/fails/
- __MACOSX/Scallop-Supplementary-camera-ready/code/scallop/examples/._fails
- Scallop-Supplementary-camera-ready/code/scallop/examples/bidirected.scl
- __MACOSX/Scallop-Supplementary-camera-ready/code/scallop/examples/._bidirected.scl
- Scallop-Supplementary-camera-ready/code/scallop/compiler/Cargo.toml
- __MACOSX/Scallop-Supplementary-camera-ready/code/scallop/compiler/._Cargo.toml
- Scallop-Supplementary-camera-ready/code/scallop/compiler/tests/
- __MACOSX/Scallop-Supplementary-camera-ready/code/scallop/compiler/._tests
- Scallop-Supplementary-camera-ready/code/scallop/compiler/build.rs
- __MACOSX/Scallop-Supplementary-camera-ready/code/scallop/compiler/._build.rs
- Scallop-Supplementary-camera-ready/code/scallop/compiler/.gitignore
- __MACOSX/Scallop-Supplementary-camera-ready/code/scallop/compiler/._.gitignore
- Scallop-Supplementary-camera-ready/code/scallop/compiler/examples/
- __MACOSX/Scallop-Supplementary-camera-ready/code/scallop/compiler/._examples
- Scallop-Supplementary-camera-ready/code/scallop/compiler/src/
- __MACOSX/Scallop-Supplementary-camera-ready/code/scallop/compiler/._src
- Scallop-Supplementary-camera-ready/code/tch-rs/torch-sys/Cargo.toml
- __MACOSX/Scallop-Supplementary-camera-ready/code/tch-rs/torch-sys/._Cargo.toml
- Scallop-Supplementary-camera-ready/code/tch-rs/torch-sys/libtch/
- __MACOSX/Scallop-Supplementary-camera-ready/code/tch-rs/torch-sys/._libtch
- Scallop-Supplementary-camera-ready/code/tch-rs/torch-sys/build.rs
- __MACOSX/Scallop-Supplementary-camera-ready/code/tch-rs/torch-sys/._build.rs
- Scallop-Supplementary-camera-ready/code/tch-rs/torch-sys/src/
- __MACOSX/Scallop-Supplementary-camera-ready/code/tch-rs/torch-sys/._src
- Scallop-Supplementary-camera-ready/code/tch-rs/tests/autocast.rs
- __MACOSX/Scallop-Supplementary-camera-ready/code/tch-rs/tests/._autocast.rs
- Scallop-Supplementary-camera-ready/code/tch-rs/tests/create_jit_models.py
- __MACOSX/Scallop-Supplementary-camera-ready/code/tch-rs/tests/._create_jit_models.py
- Scallop-Supplementary-camera-ready/code/tch-rs/tests/foo2.pt
- __MACOSX/Scallop-Supplementary-camera-ready/code/tch-rs/tests/._foo2.pt
- Scallop-Supplementary-camera-ready/code/tch-rs/tests/foo.pt
- __MACOSX/Scallop-Supplementary-camera-ready/code/tch-rs/tests/._foo.pt
- Scallop-Supplementary-camera-ready/code/tch-rs/tests/foo3.pt
- __MACOSX/Scallop-Supplementary-camera-ready/code/tch-rs/tests/._foo3.pt
- Scallop-Supplementary-camera-ready/code/tch-rs/tests/foo4.pt
- __MACOSX/Scallop-Supplementary-camera-ready/code/tch-rs/tests/._foo4.pt
- Scallop-Supplementary-camera-ready/code/tch-rs/tests/foo5.pt
- __MACOSX/Scallop-Supplementary-camera-ready/code/tch-rs/tests/._foo5.pt
- Scallop-Supplementary-camera-ready/code/tch-rs/tests/tensor_tests.rs
- __MACOSX/Scallop-Supplementary-camera-ready/code/tch-rs/tests/._tensor_tests.rs
- Scallop-Supplementary-camera-ready/code/tch-rs/tests/data_tests.rs
- __MACOSX/Scallop-Supplementary-camera-ready/code/tch-rs/tests/._data_tests.rs
- Scallop-Supplementary-camera-ready/code/tch-rs/tests/foo1.pt
- __MACOSX/Scallop-Supplementary-camera-ready/code/tch-rs/tests/._foo1.pt
- Scallop-Supplementary-camera-ready/code/tch-rs/tests/var_store.rs
- __MACOSX/Scallop-Supplementary-camera-ready/code/tch-rs/tests/._var_store.rs
- Scallop-Supplementary-camera-ready/code/tch-rs/tests/jit_tests.rs
- __MACOSX/Scallop-Supplementary-camera-ready/code/tch-rs/tests/._jit_tests.rs
- Scallop-Supplementary-camera-ready/code/tch-rs/tests/device_tests.rs
- __MACOSX/Scallop-Supplementary-camera-ready/code/tch-rs/tests/._device_tests.rs
- Scallop-Supplementary-camera-ready/code/tch-rs/tests/vision_tests.rs
- __MACOSX/Scallop-Supplementary-camera-ready/code/tch-rs/tests/._vision_tests.rs
- Scallop-Supplementary-camera-ready/code/tch-rs/tests/nn_tests.rs
- __MACOSX/Scallop-Supplementary-camera-ready/code/tch-rs/tests/._nn_tests.rs
- Scallop-Supplementary-camera-ready/code/tch-rs/tests/serialization_tests.rs
- __MACOSX/Scallop-Supplementary-camera-ready/code/tch-rs/tests/._serialization_tests.rs
- Scallop-Supplementary-camera-ready/code/tch-rs/tests/tensor_indexing.rs
- __MACOSX/Scallop-Supplementary-camera-ready/code/tch-rs/tests/._tensor_indexing.rs
- Scallop-Supplementary-camera-ready/code/tch-rs/gen/dune
- __MACOSX/Scallop-Supplementary-camera-ready/code/tch-rs/gen/._dune
- Scallop-Supplementary-camera-ready/code/tch-rs/gen/gen.ml
- __MACOSX/Scallop-Supplementary-camera-ready/code/tch-rs/gen/._gen.ml
- Scallop-Supplementary-camera-ready/code/tch-rs/gen/.ocamlformat
- __MACOSX/Scallop-Supplementary-camera-ready/code/tch-rs/gen/._.ocamlformat
- Scallop-Supplementary-camera-ready/code/tch-rs/gen/gen.mli
- __MACOSX/Scallop-Supplementary-camera-ready/code/tch-rs/gen/._gen.mli
- Scallop-Supplementary-camera-ready/code/tch-rs/.cargo/config
- __MACOSX/Scallop-Supplementary-camera-ready/code/tch-rs/.cargo/._config
- Scallop-Supplementary-camera-ready/code/tch-rs/third_party/pytorch/
- __MACOSX/Scallop-Supplementary-camera-ready/code/tch-rs/third_party/._pytorch
- Scallop-Supplementary-camera-ready/code/tch-rs/examples/mnist/
- __MACOSX/Scallop-Supplementary-camera-ready/code/tch-rs/examples/._mnist
- Scallop-Supplementary-camera-ready/code/tch-rs/examples/gan/
- __MACOSX/Scallop-Supplementary-camera-ready/code/tch-rs/examples/._gan
- Scallop-Supplementary-camera-ready/code/tch-rs/examples/translation/
- __MACOSX/Scallop-Supplementary-camera-ready/code/tch-rs/examples/._translation
- Scallop-Supplementary-camera-ready/code/tch-rs/examples/transfer-learning/
- __MACOSX/Scallop-Supplementary-camera-ready/code/tch-rs/examples/._transfer-learning
- Scallop-Supplementary-camera-ready/code/tch-rs/examples/memory_test.rs
- __MACOSX/Scallop-Supplementary-camera-ready/code/tch-rs/examples/._memory_test.rs
- Scallop-Supplementary-camera-ready/code/tch-rs/examples/jit-quantized/
- __MACOSX/Scallop-Supplementary-camera-ready/code/tch-rs/examples/._jit-quantized
- Scallop-Supplementary-camera-ready/code/tch-rs/examples/jit/
- __MACOSX/Scallop-Supplementary-camera-ready/code/tch-rs/examples/._jit
- Scallop-Supplementary-camera-ready/code/tch-rs/examples/tensor-tools.rs
- __MACOSX/Scallop-Supplementary-camera-ready/code/tch-rs/examples/._tensor-tools.rs
- Scallop-Supplementary-camera-ready/code/tch-rs/examples/min-gpt/
- __MACOSX/Scallop-Supplementary-camera-ready/code/tch-rs/examples/._min-gpt
- Scallop-Supplementary-camera-ready/code/tch-rs/examples/char-rnn/
- __MACOSX/Scallop-Supplementary-camera-ready/code/tch-rs/examples/._char-rnn
- Scallop-Supplementary-camera-ready/code/tch-rs/examples/pretrained-models/
- __MACOSX/Scallop-Supplementary-camera-ready/code/tch-rs/examples/._pretrained-models
- Scallop-Supplementary-camera-ready/code/tch-rs/examples/neural-style-transfer/
- __MACOSX/Scallop-Supplementary-camera-ready/code/tch-rs/examples/._neural-style-transfer
- Scallop-Supplementary-camera-ready/code/tch-rs/examples/yolo/
- __MACOSX/Scallop-Supplementary-camera-ready/code/tch-rs/examples/._yolo
- Scallop-Supplementary-camera-ready/code/tch-rs/examples/basics.rs
- __MACOSX/Scallop-Supplementary-camera-ready/code/tch-rs/examples/._basics.rs
- Scallop-Supplementary-camera-ready/code/tch-rs/examples/jit-train/
- __MACOSX/Scallop-Supplementary-camera-ready/code/tch-rs/examples/._jit-train
- Scallop-Supplementary-camera-ready/code/tch-rs/examples/custom-optimizer/
- __MACOSX/Scallop-Supplementary-camera-ready/code/tch-rs/examples/._custom-optimizer
- Scallop-Supplementary-camera-ready/code/tch-rs/examples/cifar/
- __MACOSX/Scallop-Supplementary-camera-ready/code/tch-rs/examples/._cifar
- Scallop-Supplementary-camera-ready/code/tch-rs/examples/vae/
- __MACOSX/Scallop-Supplementary-camera-ready/code/tch-rs/examples/._vae
- Scallop-Supplementary-camera-ready/code/tch-rs/examples/reinforcement-learning/
- __MACOSX/Scallop-Supplementary-camera-ready/code/tch-rs/examples/._reinforcement-learning
- Scallop-Supplementary-camera-ready/code/tch-rs/.github/workflows/
- __MACOSX/Scallop-Supplementary-camera-ready/code/tch-rs/.github/._workflows
- Scallop-Supplementary-camera-ready/code/tch-rs/src/wrappers/
- __MACOSX/Scallop-Supplementary-camera-ready/code/tch-rs/src/._wrappers
- Scallop-Supplementary-camera-ready/code/tch-rs/src/nn/
- __MACOSX/Scallop-Supplementary-camera-ready/code/tch-rs/src/._nn
- Scallop-Supplementary-camera-ready/code/tch-rs/src/error.rs
- __MACOSX/Scallop-Supplementary-camera-ready/code/tch-rs/src/._error.rs
- Scallop-Supplementary-camera-ready/code/tch-rs/src/lib.rs
- __MACOSX/Scallop-Supplementary-camera-ready/code/tch-rs/src/._lib.rs
- Scallop-Supplementary-camera-ready/code/tch-rs/src/vision/
- __MACOSX/Scallop-Supplementary-camera-ready/code/tch-rs/src/._vision
- Scallop-Supplementary-camera-ready/code/tch-rs/src/data.rs
- __MACOSX/Scallop-Supplementary-camera-ready/code/tch-rs/src/._data.rs
- Scallop-Supplementary-camera-ready/code/tch-rs/src/tensor/
- __MACOSX/Scallop-Supplementary-camera-ready/code/tch-rs/src/._tensor
- Scallop-Supplementary-camera-ready/code/scallop/laboratory/interpreter/Cargo.toml
- __MACOSX/Scallop-Supplementary-camera-ready/code/scallop/laboratory/interpreter/._Cargo.toml
- Scallop-Supplementary-camera-ready/code/scallop/laboratory/interpreter/tests/
- __MACOSX/Scallop-Supplementary-camera-ready/code/scallop/laboratory/interpreter/._tests
- Scallop-Supplementary-camera-ready/code/scallop/laboratory/interpreter/src/
- __MACOSX/Scallop-Supplementary-camera-ready/code/scallop/laboratory/interpreter/._src
- Scallop-Supplementary-camera-ready/code/scallop/laboratory/mnist-exp/Cargo.toml
- __MACOSX/Scallop-Supplementary-camera-ready/code/scallop/laboratory/mnist-exp/._Cargo.toml
- Scallop-Supplementary-camera-ready/code/scallop/laboratory/mnist-exp/docs/
- __MACOSX/Scallop-Supplementary-camera-ready/code/scallop/laboratory/mnist-exp/._docs
- Scallop-Supplementary-camera-ready/code/scallop/laboratory/mnist-exp/.gitignore
- __MACOSX/Scallop-Supplementary-camera-ready/code/scallop/laboratory/mnist-exp/._.gitignore
- Scallop-Supplementary-camera-ready/code/scallop/laboratory/mnist-exp/scripts/
- __MACOSX/Scallop-Supplementary-camera-ready/code/scallop/laboratory/mnist-exp/._scripts
- Scallop-Supplementary-camera-ready/code/scallop/laboratory/mnist-exp/src/
- __MACOSX/Scallop-Supplementary-camera-ready/code/scallop/laboratory/mnist-exp/._src
- Scallop-Supplementary-camera-ready/code/scallop/laboratory/sdd/Cargo.toml
- __MACOSX/Scallop-Supplementary-camera-ready/code/scallop/laboratory/sdd/._Cargo.toml
- Scallop-Supplementary-camera-ready/code/scallop/laboratory/sdd/tests/
- __MACOSX/Scallop-Supplementary-camera-ready/code/scallop/laboratory/sdd/._tests
- Scallop-Supplementary-camera-ready/code/scallop/laboratory/sdd/src/
- __MACOSX/Scallop-Supplementary-camera-ready/code/scallop/laboratory/sdd/._src
- Scallop-Supplementary-camera-ready/code/scallop/laboratory/profiler/Cargo.toml
- __MACOSX/Scallop-Supplementary-camera-ready/code/scallop/laboratory/profiler/._Cargo.toml
- Scallop-Supplementary-camera-ready/code/scallop/laboratory/profiler/src/
- __MACOSX/Scallop-Supplementary-camera-ready/code/scallop/laboratory/profiler/._src
- Scallop-Supplementary-camera-ready/code/scallop/runtime/tests/dyn_relation.rs
- __MACOSX/Scallop-Supplementary-camera-ready/code/scallop/runtime/tests/._dyn_relation.rs
- Scallop-Supplementary-camera-ready/code/scallop/runtime/tests/tuple_type.rs
- __MACOSX/Scallop-Supplementary-camera-ready/code/scallop/runtime/tests/._tuple_type.rs
- Scallop-Supplementary-camera-ready/code/scallop/runtime/tests/dyn_interop.rs
- __MACOSX/Scallop-Supplementary-camera-ready/code/scallop/runtime/tests/._dyn_interop.rs
- Scallop-Supplementary-camera-ready/code/scallop/runtime/tests/dyn_variable.rs
- __MACOSX/Scallop-Supplementary-camera-ready/code/scallop/runtime/tests/._dyn_variable.rs
- Scallop-Supplementary-camera-ready/code/scallop/runtime/tests/tch_test.rs
- __MACOSX/Scallop-Supplementary-camera-ready/code/scallop/runtime/tests/._tch_test.rs
- Scallop-Supplementary-camera-ready/code/scallop/runtime/tests/dyn_dataflow.rs
- __MACOSX/Scallop-Supplementary-camera-ready/code/scallop/runtime/tests/._dyn_dataflow.rs
- Scallop-Supplementary-camera-ready/code/scallop/runtime/examples/path-generated.rs
- __MACOSX/Scallop-Supplementary-camera-ready/code/scallop/runtime/examples/._path-generated.rs
- Scallop-Supplementary-camera-ready/code/scallop/runtime/examples/union-test.rs
- __MACOSX/Scallop-Supplementary-camera-ready/code/scallop/runtime/examples/._union-test.rs
- Scallop-Supplementary-camera-ready/code/scallop/runtime/examples/sum3-top-k-proofs-full.rs
- __MACOSX/Scallop-Supplementary-camera-ready/code/scallop/runtime/examples/._sum3-top-k-proofs-full.rs
- Scallop-Supplementary-camera-ready/code/scallop/runtime/examples/sum4-proofs-full.rs
- __MACOSX/Scallop-Supplementary-camera-ready/code/scallop/runtime/examples/._sum4-proofs-full.rs
- Scallop-Supplementary-camera-ready/code/scallop/runtime/examples/sum3-proofs-full.rs
- __MACOSX/Scallop-Supplementary-camera-ready/code/scallop/runtime/examples/._sum3-proofs-full.rs
- Scallop-Supplementary-camera-ready/code/scallop/runtime/examples/join-test.rs
- __MACOSX/Scallop-Supplementary-camera-ready/code/scallop/runtime/examples/._join-test.rs
[truncated: 578 more entries]
