# Supplementary material
Source: ML conference proceedings conference paper supplement (https://proceedings.neurips.cc/paper_files/paper/2021/hash/d367eef13f90793bd8121e2f675f0dc2-Abstract.html)
Supplement: Supplementary file 1 [file d367eef13f90793bd8121e2f675f0dc2-Supplemental.zip › Scallop-Supplementary-camera-ready/code/README.md]

### Overview

The Scallop experiments includes two part: symbolic and VQAR.

#### Symbolic
To replicate the symbolic experiment, first install the tch-rs library according to the instructions in ./tch-rs/README.md

Then run the experiments in ./scallop/laboratory/mnist-exp.
```
cd ./scallop/laboratory/mnist-exp
cargo run --release --bin <task_name> -- -<arg_name> -<arg_value>
```

#### VQAR
To run the experiments on the VQAR task, follow the instruction in ./VQAR-launcher/README.md
