# Supplementary material
Source: ML conference proceedings conference paper supplement (https://proceedings.neurips.cc/paper_files/paper/2021/hash/d367eef13f90793bd8121e2f675f0dc2-Abstract.html)
Supplement: Supplementary file 1 [file d367eef13f90793bd8121e2f675f0dc2-Supplemental.zip › Scallop-Supplementary-camera-ready/code/scallop/Cargo.toml]

[workspace]

members = [
  "runtime",
  "compiler",
  "codegen",
  "laboratory/sdd",
  "laboratory/profiler",
  "laboratory/mnist-exp",
]
