# Supplementary material
Source: ML conference proceedings conference paper supplement (https://proceedings.neurips.cc/paper_files/paper/2021/hash/d367eef13f90793bd8121e2f675f0dc2-Abstract.html)
Supplement: Supplementary file 1 [file d367eef13f90793bd8121e2f675f0dc2-Supplemental.zip › Scallop-Supplementary-camera-ready/code/scallop/codegen/examples/const-in-body-macro.rs]

use scallop_codegen::scallop;

scallop! {
  ConstInBody {
    decl rela_a(Int, Int, Int).
    decl result(Int, Int).

    result(A, B) :- rela_a(A, B, 1).
  }
}

fn main() {
  let mut prog = ConstInBody::<()>::new();

  // Initialize data
  prog.rela_a().insert(vec![(0, 1, 2), (1, 2, 3), (2, 3, 1)]);

  // Execute the program
  prog.run();

  // Investigate the results
  for elem in prog.result().complete().into_iter() {
    println!("{:?}", elem);
  }
}
