# Supplementary material
Source: ML conference proceedings conference paper supplement (https://proceedings.neurips.cc/paper_files/paper/2021/hash/d367eef13f90793bd8121e2f675f0dc2-Abstract.html)
Supplement: Supplementary file 1 [file d367eef13f90793bd8121e2f675f0dc2-Supplemental.zip › Scallop-Supplementary-camera-ready/code/scallop/codegen/examples/head-is-fact-macro.rs]

use scallop_codegen::*;

scallop! {
  HeadIsFact {
    decl head.
    decl tail.
    decl result(Symbol).

    head.

    result(1) :- head.
    result(0) :- tail.
  }
}

fn main() {
  let mut prog = HeadIsFact::<()>::new();

  // Execute the program
  prog.run();

  // Investigate the results
  for elem in prog.result().complete().into_iter() {
    println!("{:?}", elem);
  }
}
