# Supplementary material
Source: ML conference proceedings conference paper supplement (https://proceedings.neurips.cc/paper_files/paper/2021/hash/d367eef13f90793bd8121e2f675f0dc2-Abstract.html)
Supplement: Supplementary file 1 [file d367eef13f90793bd8121e2f675f0dc2-Supplemental.zip › Scallop-Supplementary-camera-ready/code/scallop/codegen/examples/path-macro.rs]

use scallop_codegen::scallop;

scallop! {
  Path {
    decl edge(Symbol, Symbol).
    decl path(Symbol, Symbol).
    path(A, B) :- edge(A, B).
    path(A, C) :- edge(A, B), path(B, C).
  }
}

fn main() {
  let mut prog = Path::<()>::new();

  // Initialize data
  prog.edge().insert(vec![(0, 0), (0, 1), (1, 3), (2, 3)]);

  // Execute the program
  prog.run();

  // Investigate the results
  for elem in prog.path().complete().into_iter() {
    println!("{:?}", elem);
  }
}
