# Supplementary material
Source: ML conference proceedings conference paper supplement (https://proceedings.neurips.cc/paper_files/paper/2021/hash/d367eef13f90793bd8121e2f675f0dc2-Abstract.html)
Supplement: Supplementary file 1 [file d367eef13f90793bd8121e2f675f0dc2-Supplemental.zip › Scallop-Supplementary-camera-ready/code/scallop/codegen/examples/prob-fact-macro.rs]

use scallop_codegen::scallop;

scallop! {
  VQARSmallExample {
    decl name(Symbol, String).
    decl attr(Symbol, String).
    decl target(Symbol).

    0.8::name(1, "giraffe").
    0.3::attr(1, "tall").

    target(A) :- name(A, "giraffe"), attr(A, "tall").
  }
}

fn main() {
  let mut prog = VQARSmallExample::<TopKProbProofs<3>>::new();

  // Execute the program
  prog.run();

  // Investigate the results
  for elem in prog.target().complete().into_iter() {
    println!("{:?}", elem);
  }
}
