# Supplementary material
Source: ML conference proceedings conference paper supplement (https://proceedings.neurips.cc/paper_files/paper/2021/hash/d367eef13f90793bd8121e2f675f0dc2-Abstract.html)
Supplement: Supplementary file 1 [file d367eef13f90793bd8121e2f675f0dc2-Supplemental.zip › Scallop-Supplementary-camera-ready/code/scallop/compiler/build.rs]

extern crate lalrpop;

fn main() {
  lalrpop::Configuration::new()
    .generate_in_source_tree()
    .process()
    .unwrap();
}
