# Supplementary material
Source: ML conference proceedings conference paper supplement (https://proceedings.neurips.cc/paper_files/paper/2021/hash/d367eef13f90793bd8121e2f675f0dc2-Abstract.html)
Supplement: Supplementary file 1 [file d367eef13f90793bd8121e2f675f0dc2-Supplemental.zip › Scallop-Supplementary-camera-ready/code/scallop/compiler/Cargo.toml]

[package]
name = "scallop-compiler"
version = "0.1.0"
edition = "2018"

[build-dependencies]
lalrpop = { version = "0.19.0", features = ["lexer"] }

[dependencies]
lalrpop-util = "0.19.0"
termion = "1.5"
structopt = "0.3"
proc-macro2 = "1.0"
quote = "1.0"
syn = "1.0"
paste = "1.0"
