# Supplementary material
Source: ML conference proceedings conference paper supplement (https://proceedings.neurips.cc/paper_files/paper/2021/hash/d367eef13f90793bd8121e2f675f0dc2-Abstract.html)
Supplement: Supplementary file 1 [file d367eef13f90793bd8121e2f675f0dc2-Supplemental.zip › Scallop-Supplementary-camera-ready/code/scallop/compiler/src/common.rs]

#[derive(Clone, Debug, PartialEq)]
pub enum Type {
  Symbol,
  Integer,
  Boolean,
  String,
}

#[derive(Clone, Debug)]
pub enum BinaryOp {
  Eq,
  Ne,
  Lt,
  Lte,
  Gt,
  Gte,
  And,
  Or,
  Add,
  Sub,
  Mult,
  Div,
}

#[derive(Clone, Debug)]
pub enum UnaryOp {
  Not,
  Pos,
  Neg,
}
