# Supplementary material
Source: ML conference proceedings conference paper supplement (https://proceedings.neurips.cc/paper_files/paper/2021/hash/d367eef13f90793bd8121e2f675f0dc2-Abstract.html)
Supplement: Supplementary file 1 [file d367eef13f90793bd8121e2f675f0dc2-Supplemental.zip › Scallop-Supplementary-camera-ready/code/scallop/compiler/src/syntax.lalrpop]

use std::str::FromStr;

use crate::ast::*;
use crate::common::{BinaryOp, UnaryOp};
use crate::parser::*;

grammar;

// Tokens
match {
  // Decl
  ":-",
  ":",
  ";",
  ",",
  ".",
  "_",
  "::",
  "~",

  // Compare
  "==",
  "<=",
  ">=",
  "<",
  ">",
  "!=",

  // Arith
  "+",
  "-",
  "*",
  "/",
  "&&",
  "||",
  "!",

  // Brackets
  "(",
  ")",

  // Keywords
  "Symbol",
  "Int",
  "Bool",
  "String",
  "true",
  "false",
  "decl",

  // Comments and Whitespaces
  r"\s*" => { },
  r"//[^\n\r]*[\n\r]*" => { },
  r"/\*([^\*]*\*+[^\*/])*([^\*]*\*+|[^\*])*\*/" => { },

  // Regex
  r"[a-z][a-z_0-9]*" => lower_case_name,
  r"[A-Z][a-zA-Z_0-9]*" => initial_upper_case_name,
  r"-?[0-9]+" => int,
  r"-?\d+(\.\d+)(e-?\d+)?" => float,
  r#""[^"]*""# => string,
}

// Helpers

Separated<E, S>: Vec<E> = {
  <rs: (<E> S)*> <e: E?> => rs.into_iter().chain(e.into_iter()).collect()
}

SeparatedStrict<E, S>: Vec<E> = {
  <rs: (<E> S)*> <e: E> => rs.into_iter().chain(vec![e].into_iter()).collect()
}

AtLeastOneSeparated<E, S>: Vec<E> = {
  <r1: E> => vec![r1],
  <r1: E> <rs: (S <E>)+> S? => vec![vec![r1], rs].concat(),
}

AtLeastOneSeparatedStrict<E, S>: Vec<E> = {
  <r1: E> => vec![r1],
  <r1: E> <rs: (S <E>)+> => vec![vec![r1], rs].concat(),
}

AtLeastTwoSeparated<E, S>: Vec<E> = {
  <r1: E> <rs: (S <E>)+> S? => vec![vec![r1], rs].concat(),
}

AtLeastTwoSeparatedStrict<E, S>: Vec<E> = {
  <r1: E> <rs: (S <E>)+> => vec![vec![r1], rs].concat(),
}

// Literals

LowerCaseName: String = lower_case_name => (<>).to_string();

InitialUpperCaseName: String = initial_upper_case_name => (<>).to_string();

Int: i64 = int => i64::from_str(<>).unwrap();

Float: f32 = float => f32::from_str(<>).unwrap();

StringLiteral: String = <s: string> => s[1..s.len() - 1].into();

EndOfItem: () = ".";

// Terms and arguments

Argument: Argument = Term;

Term: Argument = LogicalExpr;

LogicalExpr: Argument = {
  <a: @L> <lhs: LogicalExpr> <op: LogicalOp> <rhs: ComparisonExpr> <b: @L> => {
    Argument::Binary(BinaryExpr::span(a, b, (op, Box::new(lhs), Box::new(rhs))))
  },
  ComparisonExpr,
}

LogicalOp: BinaryOp = {
  "&&" => BinaryOp::And,
  "||" => BinaryOp::Or,
}

ComparisonExpr: Argument = {
  <a: @L> <lhs: AddSubExpr> <op: ComparisonOp> <rhs: AddSubExpr> <b: @L> => {
    Argument::Binary(BinaryExpr::span(a, b, (op, Box::new(lhs), Box::new(rhs))))
  },
  AddSubExpr,
}

ComparisonOp: BinaryOp = {
  "==" => BinaryOp::Eq,
  "!=" => BinaryOp::Ne,
  "<" => BinaryOp::Lt,
  "<=" => BinaryOp::Lte,
  ">" => BinaryOp::Gt,
  ">=" => BinaryOp::Gte,
}

AddSubExpr: Argument = {
  <a: @L> <lhs: AddSubExpr> <op: AddSub> <rhs: MulDivExpr> <b: @L> => {
    Argument::Binary(BinaryExpr::span(a, b, (op, Box::new(lhs), Box::new(rhs))))
  },
  MulDivExpr,
}

AddSub: BinaryOp = {
  "+" => BinaryOp::Add,
  "-" => BinaryOp::Sub,
}

MulDivExpr: Argument = {
  <a: @L> <lhs: MulDivExpr> <op: MultDiv> <rhs: AtomArgument> <b: @L> => {
    Argument::Binary(BinaryExpr::span(a, b, (op, Box::new(lhs), Box::new(rhs))))
  },
  UnaryExpr,
}

MultDiv: BinaryOp = {
  "*" => BinaryOp::Mult,
  "/" => BinaryOp::Div,
}

UnaryExpr: Argument = {
  <a: @L> <op: UnaryOp> <arg: UnaryExpr> <b: @L> => {
    Argument::Unary(UnaryExpr::span(a, b, (op, Box::new(arg))))
  },
  AtomExpr,
}

UnaryOp: UnaryOp = {
  "+" => UnaryOp::Pos,
  "-" => UnaryOp::Neg,
  "!" => UnaryOp::Not,
}

AtomExpr: Argument = {
  AtomArgument,
  "(" <t: Argument> ")" => t,
}

AtomArgument: Argument = {
  <a: @L> "_" <b: @L> => Argument::Wildcard(Wildcard::span(a, b, ())),
  <c: Constant> => Argument::Constant(c),
  <a: @L> <n: InitialUpperCaseName> <b: @L> => Argument::Variable(Variable::span(a, b, n)),
  <a: @L> <n: LowerCaseName> <b: @L> => Argument::Constant(Constant::span(a, b, ConstantNode::Symbol(n))),
}

Constant: Constant = {
  <a: @L> <i: Int> <b: @L> => Constant::span(a, b, ConstantNode::Integer(i)),
  <a: @L> "true" <b: @L> => Constant::span(a, b, ConstantNode::Boolean(true)),
  <a: @L> "false" <b: @L> => Constant::span(a, b, ConstantNode::Boolean(false)),
  <a: @L> <s: StringLiteral> <b: @L> => Constant::span(a, b, ConstantNode::String(s.to_string())),
}

Atom: Atom = {
  <a: @L> <n: LowerCaseName> <b: @L> => {
    Atom::span(a, b, (n, vec![]))
  },
  <a: @L> <n: LowerCaseName> "(" <args: Separated<Argument, ",">> ")" <b: @L> => {
    Atom::span(a, b, (n, args))
  }
}

UnaryConstraint: UnaryConstraint = {
  <a: @L> "!" <arg: AddSubExpr> <b: @L> => {
    UnaryConstraint::span(a, b, (UnaryOp::Not, arg))
  }
}

BinaryConstraint: BinaryConstraint = {
  <a: @L> <op1: AddSubExpr> <op: ComparisonOp> <op2: AddSubExpr> <b: @L> => {
    BinaryConstraint::span(a, b, (op, op1, op2))
  }
}

Constraint: Constraint = {
  // TODO: Solve unary binary constraint conflict
  // <u: UnaryConstraint> => Constraint::Unary(u),
  <b: BinaryConstraint> => Constraint::Binary(b),
}

Literal: Literal = {
  <a: @L> <atom: Atom> <b: @L> => Literal::span(a, b, LiteralNode::Pos(atom)),
  <a: @L> "~" <atom: Atom> <b: @L> => Literal::span(a, b, LiteralNode::Neg(atom)),
  <a: @L> <c: Constraint> <b: @L> => Literal::span(a, b, LiteralNode::Constraint(c)),
}

Type: Type = {
  <a: @L> "Symbol" <b: @L> => Type::span(a, b, TypeNode::Symbol),
  <a: @L> "Int" <b: @L> => Type::span(a, b, TypeNode::Integer),
  <a: @L> "Bool" <b: @L> => Type::span(a, b, TypeNode::Boolean),
  <a: @L> "String" <b: @L> => Type::span(a, b, TypeNode::String),
}

Decl: Decl = {
  <a: @L> "decl" <name: LowerCaseName> EndOfItem <b: @L> => {
    Decl::span(a, b, (name, vec![]))
  },
  <a: @L> "decl" <name: LowerCaseName> "(" ")" EndOfItem <b: @L> => {
    Decl::span(a, b, (name, vec![]))
  },
  <a: @L> "decl" <name: LowerCaseName> "(" <types: AtLeastOneSeparated<Type, ",">> ")" EndOfItem <b: @L> => {
    Decl::span(a, b, (name, types))
  },
}

Fact: Fact = {
  <a: @L> <p: Float> "::" <atom: Atom> <b: @L> => {
    Fact::span(a, b, (Some(p), atom))
  },
  <a: @L> <atom: Atom> <b: @L> => {
    Fact::span(a, b, (None, atom))
  }
}

Disjunction: Disjunction = {
  <a: @L> <facts: AtLeastTwoSeparated<Fact, ";">> EndOfItem <b: @L> => {
    Disjunction::span(a, b, facts)
  }
}

pub Rule: Rule = {
  <a: @L> <head: Atom> ":-" <body: AtLeastOneSeparated<Literal, ",">> EndOfItem <b: @L> => {
    Rule::span(a, b, (head, body))
  }
}

Item: Item = {
  <d: Decl> => Item::Decl(d),
  <f: Fact> EndOfItem => Item::Fact(f),
  <d: Disjunction> => Item::Disjunction(d),
  <r: Rule> => Item::Rule(r),
}

pub Items: Vec<Item> = <Item*>;
