# Supplementary material
Source: ML conference proceedings conference paper supplement (https://proceedings.neurips.cc/paper_files/paper/2021/hash/d367eef13f90793bd8121e2f675f0dc2-Abstract.html)
Supplement: Supplementary file 1 [file d367eef13f90793bd8121e2f675f0dc2-Supplemental.zip › Scallop-Supplementary-camera-ready/code/scallop/examples/drop/history-86-9.scl]

// decl noun_id(Symbol, String).
// decl verb_id(Symbol, String).
decl num_id(Symbol, String, String).

decl sv(Symbol, Symbol).
decl vo(Symbol, Symbol).
// decl noun_num(Symbol, Symbol).
decl verb_num(Symbol, Symbol).
// decl noun_verb(Symbol, Symbol).

// Sentence 1.
num_id(0, "early 2000s", "year").
// noun_id(1, "computer").
// noun_id(2, "flash").
// verb_id(3, "install").
// verb_id(4, "display").
// noun_id(5, "web pages").
// noun_id(6, "games").
// verb_id(7, "playback").
// noun_id(8, "content").

sv(1, 3).
sv(1, 4).
sv(1, 7).
vo(3, 2).
vo(4, 5).
vo(4, 6).
vo(7, 8).
verb_num(3, 0). // "install", "early 2000s"

// Sentence 2
// noun_id(9, "Youtube").
// verb_id(10, "found").
// noun_id(11, "employee").
// verb_id(12, "used").
// noun_id(13, "Flash player").
// noun_id(14, "means").
// verb_id(15, "display").
// noun_id(16, "content").
// noun_id(17, "web").
num_id(18, "2005", "year").

sv(11, 10).
sv(9, 13).
sv(14, 15).
vo(10, 9).
vo(12, 13).
vo(15, 16).
verb_num(10, 18). // "found", "2005"
verb_num(12, 18). // "used", "2005"

// In 2007, YouTube offered videos in HTML5 format to support the iPhone and iPad, which did not support Flash Player.
// Sentence 6
// noun_id(19, "Youtube").
// verb_id(20, "offer").
// noun_id(21, "videos").
// noun_id(22, "HTML5").
// noun_id(23, "format").
// noun_id(24, "iPhone").
// noun_id(25, "iPad").
// verb_id(26, "support").
// noun_id(27, "Flash Player").
num_id(28, "2007", "year").
verb_num(20, 28). // "offered", "2007"
sv(19, 20).

// In 2015, YouTube switched to HTML5 technology on all devices, however it will preserve the Flash-based video player for older web browsers.
// Sentence 9
// noun_id(29, "Youtube").
// verb_id(30, "switch").
// noun_id(31, "HTML5").
// noun_id(32, "technology").
// noun_id(33, "device").
// noun_id(34, "it").
// verb_id(35, "preserve").
// noun_id(36, "player").
// noun_id(37, "browsers").
num_id(38, "2015", "year").
verb_num(30, 38). // "offered", "2007"
sv(29, 30).
vo(30, 31).
vo(30, 32).

decl happens_year(Symbol, Symbol).
happens_year(Vid, Yid) :- verb_num(Vid, Yid), num_id(Yid, _, "year").

// Should be realized using external function
decl bigger_than(Symbol, Symbol).
bigger_than(38, 28).
bigger_than(28, 18).
bigger_than(38, 18).

// Q: What event happened first , Youtube switching to HTML5 technology on all devices , or Youtube being founded by former PayPal employees ?
// The first correct program
decl target(String).
target("Youtube switching to HTML5 technology on all devices") :-
  happens_year(30, Yid1), // "switch", Year1
  happens_year(10, Yid2), // "found", Year2
  bigger_than(Yid1, Yid2).
target("Youtube being founded by former PayPal employees") :-
  happens_year(30, Yid1), // "switch", Year1
  happens_year(10, Yid2), // "found", Year2
  bigger_than(Yid2, Yid1).

decl target3(String, Symbol, Symbol).
target3("Youtube switching to HTML5 technology on all devices", Yid1, Yid2) :-
  vo(Vid1, 31), happens_year(Vid1, Yid1), // "html5"
  sv(11, Vid2), happens_year(Vid2, Yid2), // "employee"
  bigger_than(Yid1, Yid2).
target3("Youtube being founded by former PayPal employees", Yid1, Yid2) :-
  vo(Vid1, 31), happens_year(Vid1, Yid1), // "html5"
  sv(11, Vid2), happens_year(Vid2, Yid2), // "employee"
  bigger_than(Yid2, Yid1).
