# Supplementary material
Source: ML conference proceedings conference paper supplement (https://proceedings.neurips.cc/paper_files/paper/2021/hash/d367eef13f90793bd8121e2f675f0dc2-Abstract.html)
Supplement: Supplementary file 1 [file d367eef13f90793bd8121e2f675f0dc2-Supplemental.zip › Scallop-Supplementary-camera-ready/code/scallop/examples/path.scl]

decl path(Symbol, Symbol).
decl edge(Symbol, Symbol).

path(A, B) :- edge(A, B).
path(A, C) :- path(B, C), edge(A, B).
