# Supplementary material
Source: ML conference proceedings conference paper supplement (https://proceedings.neurips.cc/paper_files/paper/2021/hash/d367eef13f90793bd8121e2f675f0dc2-Abstract.html)
Supplement: Supplementary file 1 [file d367eef13f90793bd8121e2f675f0dc2-Supplemental.zip › Scallop-Supplementary-camera-ready/code/scallop/examples/sanity/join-subset.scl]

decl rela_a(Symbol, Symbol, Symbol).
decl rela_b(Symbol, Symbol).
decl result(Symbol, Symbol).

result(A, B) :- rela_a(A, B, C), rela_b(B, C).
