# Supplementary material
Source: ML conference proceedings conference paper supplement (https://proceedings.neurips.cc/paper_files/paper/2021/hash/d367eef13f90793bd8121e2f675f0dc2-Abstract.html)
Supplement: Supplementary file 1 [file d367eef13f90793bd8121e2f675f0dc2-Supplemental.zip › Scallop-Supplementary-camera-ready/code/scallop/examples/sanity/not.scl]

// number(1);
// number(2);
// number(3).
//
// 0.9::not_digit(I1, 5).

// target(I, N) :- number(N), ~not_digit(I, N'), N != N'.
