# Supplementary material
Source: ML conference proceedings conference paper supplement (https://proceedings.neurips.cc/paper_files/paper/2021/hash/d367eef13f90793bd8121e2f675f0dc2-Abstract.html)
Supplement: Supplementary file 1 [file d367eef13f90793bd8121e2f675f0dc2-Supplemental.zip › Scallop-Supplementary-camera-ready/code/scallop/examples/sanity/prob-fact.scl]

decl name(Symbol, String).
decl attr(Symbol, String).
decl target(Symbol).

0.8::name(1, "giraffe").
0.3::attr(1, "tall").

target(A) :- name(A, "giraffe"), attr(A, "tall").
