# Supplementary material
Source: ML conference proceedings conference paper supplement (https://proceedings.neurips.cc/paper_files/paper/2021/hash/d367eef13f90793bd8121e2f675f0dc2-Abstract.html)
Supplement: Supplementary file 1 [file d367eef13f90793bd8121e2f675f0dc2-Supplemental.zip › Scallop-Supplementary-camera-ready/code/scallop/examples/student-enroll.scl]

decl student(Int, String).
decl course(Int, String).
decl enroll(Int, Int).
decl students_in_cis_500(String).

student(1, "alice").
student(2, "bob").
student(3, "catherine").

course(1, "cis-500").
course(2, "cis-515").
course(3, "cis-548").

enroll(1, 1).
enroll(1, 3).
enroll(2, 2).
enroll(3, 1).
enroll(3, 2).

students_in_cis_500(N) :- student(SID, N), course(CID, "cis-500"), enroll(SID, CID).
