# Supplementary material
Source: ML conference proceedings conference paper supplement (https://proceedings.neurips.cc/paper_files/paper/2021/hash/d367eef13f90793bd8121e2f675f0dc2-Abstract.html)
Supplement: Supplementary file 1 [file d367eef13f90793bd8121e2f675f0dc2-Supplemental.zip › Scallop-Supplementary-camera-ready/code/scallop/examples/sudoku4x4.scl]

decl number(Int).

decl two_nums(Int, Int).

decl row(Int, Int, Int, Int).

decl two_rows(Int, Int, Int, Int,
              Int, Int, Int, Int).

decl sudoku4x4(Int, Int, Int, Int,
                Int, Int, Int, Int,
                Int, Int, Int, Int,
                Int, Int, Int, Int).

number(1).
number(2).
number(3).
number(4).

two_nums(A, B) :-
  number(A),
  number(B),
  A != B.

row(A, B, C, D) :-
  two_nums(A, B),
  two_nums(C, D),
  A != C, A != D, B != C, B != D.

two_rows(A1, B1, C1, D1, A2, B2, C2, D2) :-
  row(A1, B1, C1, D1),
  row(A2, B2, C2, D2),
  A1 != A2, A1 != B2, B1 != A2, B1 != B2,
  C1 != C2, C1 != D2, D1 != C2, D1 != D2.

sudoku4x4(A1, B1, C1, D1,
          A2, B2, C2, D2,
          A3, B3, C3, D3,
          A4, B4, C4, D4) :-
  two_rows(A1, B1, C1, D1,
            A2, B2, C2, D2),
  two_rows(A3, B3, C3, D3,
            A4, B4, C4, D4),
  A1 != A3, A1 != A4, A2 != A3, A2 != A4,
  B1 != B3, B1 != B4, B2 != B3, B2 != B4,
  C1 != C3, C1 != C4, C2 != C3, C2 != C4,
  D1 != D3, D1 != D4, D2 != D3, D2 != D4.
