# Supplementary material
Source: ML conference proceedings conference paper supplement (https://proceedings.neurips.cc/paper_files/paper/2021/hash/d367eef13f90793bd8121e2f675f0dc2-Abstract.html)
Supplement: Supplementary file 1 [file d367eef13f90793bd8121e2f675f0dc2-Supplemental.zip › Scallop-Supplementary-camera-ready/code/scallop/laboratory/interpreter/Cargo.toml]

[package]
name = "scallop-interpreter"
version = "0.1.0"
edition = "2018"

[dependencies]
scallop-runtime = { path = "../../runtime" }
