# Supplementary material
Source: ML conference proceedings conference paper supplement (https://proceedings.neurips.cc/paper_files/paper/2021/hash/d367eef13f90793bd8121e2f675f0dc2-Abstract.html)
Supplement: Supplementary file 1 [file d367eef13f90793bd8121e2f675f0dc2-Supplemental.zip › Scallop-Supplementary-camera-ready/code/scallop/readme.md]

# Scallop

A scalable probabilistic datalog engine with Rust.

## Usage

The Scallop system is best integrated inside of the Rust context.
With `scallop! { ... }` macro, you can easily embed a Probablistic Datalog program.

``` rust
use scallop_codegen::scallop;

scallop! {
  VQARSmallExample {
    decl name(Symbol, String).
    decl attr(Symbol, String).
    decl is_a(String, String).
    decl target(Symbol).

    name(A, B) :- name(A, N), is_a(N, B).

    is_a("giraffe", "animal").
    is_a("tiger", "animal").
    is_a("wolf", "animal").

    0.8::name(1, "giraffe");
    0.01::name(1, "tiger");
    0.18::name(1, "wolf").

    0.3::attr(1, "tall").

    target(A) :- name(A, "animal"), attr(A, "tall").
  }
}

fn main() {
  let mut prog = VQARSmallExample::<TopKProbProofs<3>>::new();

  // Execute the program
  prog.run();

  // Investigate the results
  for elem in prog.target().complete() {
    println!("{:?}", elem);
  }
}
```

In a Rust program, one will instantiate a new Datalog program with its execution context,
add input facts, can call `run()` to execute the Datalog program.

## Build from source

Please install [Rust](https://rustup.rs) and use the `nightly` branch (`rustup default nightly`).
After that, please build using

```
$ cargo build --release
```

Make sure you add `--release` to ensure its performance.

Then you can install the compiler `sclc` by using the following command.

```
$ cargo install --path compiler
```
