# Supplementary material
Source: ML conference proceedings conference paper supplement (https://proceedings.neurips.cc/paper_files/paper/2021/hash/d367eef13f90793bd8121e2f675f0dc2-Abstract.html)
Supplement: Supplementary file 1 [file d367eef13f90793bd8121e2f675f0dc2-Supplemental.zip › Scallop-Supplementary-camera-ready/code/scallop/runtime/Cargo.toml]

[package]
name = "scallop-runtime"
version = "0.1.0"
edition = "2018"

[dependencies]
sdd = { path = "../laboratory/sdd" }
scallop-compiler = { path = "../compiler" }
tch = { git = "../../tch-rs" }
openssl = { version = "0.10", features = ["vendored"] }
rayon = "1.5"

[dev-dependencies]
rand = "0.8"
