# Supplementary material
Source: ML conference proceedings conference paper supplement (https://proceedings.neurips.cc/paper_files/paper/2021/hash/d367eef13f90793bd8121e2f675f0dc2-Abstract.html)
Supplement: Supplementary file 1 [file d367eef13f90793bd8121e2f675f0dc2-Supplemental.zip › Scallop-Supplementary-camera-ready/code/scallop/runtime/src/error.rs]

use scallop_compiler::error::CompileError;

#[derive(Clone, Debug)]
pub enum RuntimeError {
  VariableAlreadyExisted,
  UndefinedVariable,
  CompileError(CompileError),
}
