# Supplementary material
Source: ML conference proceedings conference paper supplement (https://proceedings.neurips.cc/paper_files/paper/2021/hash/d367eef13f90793bd8121e2f675f0dc2-Abstract.html)
Supplement: Supplementary file 1 [file d367eef13f90793bd8121e2f675f0dc2-Supplemental.zip › Scallop-Supplementary-camera-ready/code/scallop/runtime/tests/tch_test.rs]

use tch::Tensor;

#[test]
fn tch_test_1() {
  let t = Tensor::stack(&vec![Tensor::of_slice(&[3])], 0);
  t.print();
  let t = t.one_hot(10);
  println!("{:?}", t);
}
