# Supplementary material
Source: ML conference proceedings conference paper supplement (https://proceedings.neurips.cc/paper_files/paper/2021/hash/d367eef13f90793bd8121e2f675f0dc2-Abstract.html)
Supplement: Supplementary file 1 [file d367eef13f90793bd8121e2f675f0dc2-Supplemental.zip › Scallop-Supplementary-camera-ready/code/scallop/runtime/tests/tuple_type.rs]

use scallop_runtime::*;

#[test]
fn tuple_type_1() {
  let got = <TupleType as FromType<(usize, usize)>>::from_type();
  let exp = TupleType::Tuple(vec![TupleType::Symbol, TupleType::Symbol]);
  println!("{:?}", got);
  assert_eq!(got, exp);
}
