# Supplementary material
Source: ML conference proceedings conference paper supplement (https://proceedings.neurips.cc/paper_files/paper/2021/hash/d367eef13f90793bd8121e2f675f0dc2-Abstract.html)
Supplement: Supplementary file 1 [file d367eef13f90793bd8121e2f675f0dc2-Supplemental.zip › Scallop-Supplementary-camera-ready/code/tch-rs/.cargo/config]

[target.x86_64-unknown-linux-gnu]
rustflags = ["-C", "link-arg=-Wl,--allow-shlib-undefined", "-C", "link-arg=-fno-lto"]
