# Supplementary material
Source: ML conference proceedings conference paper supplement (https://proceedings.neurips.cc/paper_files/paper/2021/hash/d367eef13f90793bd8121e2f675f0dc2-Abstract.html)
Supplement: Supplementary file 1 [file d367eef13f90793bd8121e2f675f0dc2-Supplemental.zip › Scallop-Supplementary-camera-ready/code/tch-rs/examples/basics.rs]

extern crate tch;

use tch::{kind, Tensor};

fn grad_example() {
    let mut x = Tensor::from(2.0).set_requires_grad(true);
    let y = &x * &x + &x + 36;
    println!("{}", y.double_value(&[]));
    x.zero_grad();
    y.backward();
    let dy_over_dx = x.grad();
    println!("{}", dy_over_dx.double_value(&[]));
}

fn main() {
    tch::maybe_init_cuda();
    let t = Tensor::of_slice(&[3, 1, 4, 1, 5]);
    t.print();
    let t = Tensor::randn(&[5, 4], kind::FLOAT_CPU);
    t.print();
    (&t + 1.5).print();
    (&t + 2.5).print();
    let mut t = Tensor::of_slice(&[1.1f32, 2.1, 3.1]);
    t += 42;
    t.print();
    println!("{:?} {}", t.size(), t.double_value(&[1]));
    grad_example();
    println!("Cuda available: {}", tch::Cuda::is_available());
    println!("Cudnn available: {}", tch::Cuda::cudnn_is_available());
}
