# Supplementary material
Source: ML conference proceedings conference paper supplement (https://proceedings.neurips.cc/paper_files/paper/2021/hash/d367eef13f90793bd8121e2f675f0dc2-Abstract.html)
Supplement: Supplementary file 1 [file d367eef13f90793bd8121e2f675f0dc2-Supplemental.zip › Scallop-Supplementary-camera-ready/code/tch-rs/examples/jit/main.rs]

// This example illustrates how to use a PyTorch model trained and exported using the
// Python JIT API.
// See https://pytorch.org/tutorials/advanced/cpp_export.html for more details.
extern crate tch;
use anyhow::{bail, Result};
use tch::vision::imagenet;

pub fn main() -> Result<()> {
    let args: Vec<_> = std::env::args().collect();
    let (model_file, image_file) = match args.as_slice() {
        [_, m, i] => (m.to_owned(), i.to_owned()),
        _ => bail!("usage: main model.pt image.jpg"),
    };
    // Load the image file and resize it to the usual imagenet dimension of 224x224.
    let image = imagenet::load_image_and_resize224(image_file)?;

    // Load the Python saved module.
    let model = tch::CModule::load(model_file)?;

    // Apply the forward pass of the model to get the logits.
    let output = image
        .unsqueeze(0)
        .apply(&model)
        .softmax(-1, tch::Kind::Float);

    // Print the top 5 categories for this image.
    for (probability, class) in imagenet::top(&output, 5).iter() {
        println!("{:50} {:5.2}%", class, 100.0 * probability)
    }
    Ok(())
}
