# Supplementary material
Source: ML conference proceedings conference paper supplement (https://proceedings.neurips.cc/paper_files/paper/2021/hash/d367eef13f90793bd8121e2f675f0dc2-Abstract.html)
Supplement: Supplementary file 1 [file d367eef13f90793bd8121e2f675f0dc2-Supplemental.zip › Scallop-Supplementary-camera-ready/code/tch-rs/examples/memory_test.rs]

// This example is useful to check for memory leaks.
// A large number of tensors are created either on the cpu or on the gpu and one
// can monitor the main memory usage or the gpu memory at the same time.
extern crate tch;
use tch::Tensor;

fn main() {
    let a: Vec<String> = std::env::args().collect();
    let device = match a.iter().map(|x| x.as_str()).collect::<Vec<_>>().as_slice() {
        [_] => tch::Device::Cpu,
        [_, "cpu"] => tch::Device::Cpu,
        [_, "gpu"] => tch::Device::Cuda(0),
        _ => panic!("usage: main cpu|gpu"),
    };
    let slice = vec![0; 1_000_000];
    for i in 1..1_000_000 {
        let t = Tensor::of_slice(&slice).to_device(device);
        println!("{} {:?}", i, t.size())
    }
}
