# Supplementary material
Source: ML conference proceedings conference paper supplement (https://proceedings.neurips.cc/paper_files/paper/2021/hash/d367eef13f90793bd8121e2f675f0dc2-Abstract.html)
Supplement: Supplementary file 1 [file d367eef13f90793bd8121e2f675f0dc2-Supplemental.zip › Scallop-Supplementary-camera-ready/code/tch-rs/examples/mnist/mnist_conv.rs]

// CNN model. This should rearch 99.1% accuracy.

use anyhow::Result;
use tch::{nn, nn::ModuleT, nn::OptimizerConfig, Device, Tensor};

#[derive(Debug)]
struct Net {
    conv1: nn::Conv2D,
    conv2: nn::Conv2D,
    fc1: nn::Linear,
    fc2: nn::Linear,
}

impl Net {
    fn new(vs: &nn::Path) -> Net {
        let conv1 = nn::conv2d(vs, 1, 32, 5, Default::default());
        let conv2 = nn::conv2d(vs, 32, 64, 5, Default::default());
        let fc1 = nn::linear(vs, 1024, 1024, Default::default());
        let fc2 = nn::linear(vs, 1024, 10, Default::default());
        Net {
            conv1,
            conv2,
            fc1,
            fc2,
        }
    }
}

impl nn::ModuleT for Net {
    fn forward_t(&self, xs: &Tensor, train: bool) -> Tensor {
        xs.view([-1, 1, 28, 28])
            .apply(&self.conv1)
            .max_pool2d_default(2)
            .apply(&self.conv2)
            .max_pool2d_default(2)
            .view([-1, 1024])
            .apply(&self.fc1)
            .relu()
            .dropout_(0.5, train)
            .apply(&self.fc2)
    }
}

pub fn run() -> Result<()> {
    let m = tch::vision::mnist::load_dir("data")?;
    let vs = nn::VarStore::new(Device::cuda_if_available());
    let net = Net::new(&vs.root());
    let mut opt = nn::Adam::default().build(&vs, 1e-4)?;
    for epoch in 1..100 {
        for (bimages, blabels) in m.train_iter(256).shuffle().to_device(vs.device()) {
            let loss = net
                .forward_t(&bimages, true)
                .cross_entropy_for_logits(&blabels);
            opt.backward_step(&loss);
        }
        let test_accuracy =
            net.batch_accuracy_for_logits(&m.test_images, &m.test_labels, vs.device(), 1024);
        println!("epoch: {:4} test acc: {:5.2}%", epoch, 100. * test_accuracy,);
    }
    Ok(())
}
