# Supplementary material
Source: ML conference proceedings conference paper supplement (https://proceedings.neurips.cc/paper_files/paper/2021/hash/d367eef13f90793bd8121e2f675f0dc2-Abstract.html)
Supplement: Supplementary file 1 [file d367eef13f90793bd8121e2f675f0dc2-Supplemental.zip › Scallop-Supplementary-camera-ready/code/tch-rs/examples/neural-style-transfer/main.rs]

// This is inspired by the Neural Style tutorial from PyTorch.org
//   https://pytorch.org/tutorials/advanced/neural_style_tutorial.html
// The pre-trained weights for the VGG16 model can be downloaded from:
//   https://github.com/LaurentMazare/ocaml-torch/releases/download/v0.1-unstable/vgg16.ot
extern crate tch;
use anyhow::{bail, Result};
use tch::vision::{imagenet, vgg};
use tch::{nn, nn::OptimizerConfig, Device, Tensor};

const STYLE_WEIGHT: f64 = 1e6;
const LEARNING_RATE: f64 = 1e-1;
const TOTAL_STEPS: i64 = 3000;
const STYLE_INDEXES: [usize; 5] = [0, 2, 5, 7, 10];
const CONTENT_INDEXES: [usize; 1] = [7];

fn gram_matrix(m: &Tensor) -> Tensor {
    let (a, b, c, d) = m.size4().unwrap();
    let m = m.view([a * b, c * d]);
    let g = m.matmul(&m.tr());
    g / (a * b * c * d)
}

fn style_loss(m1: &Tensor, m2: &Tensor) -> Tensor {
    gram_matrix(m1).mse_loss(&gram_matrix(m2), tch::Reduction::Mean)
}

pub fn main() -> Result<()> {
    let device = Device::cuda_if_available();
    let args: Vec<_> = std::env::args().collect();
    let (style_img, content_img, weights) = match args.as_slice() {
        [_, s, c, w] => (s.to_owned(), c.to_owned(), w.to_owned()),
        _ => bail!("usage: main style.jpg content.jpg vgg16.ot"),
    };

    let mut net_vs = tch::nn::VarStore::new(device);
    let net = vgg::vgg16(&net_vs.root(), imagenet::CLASS_COUNT);
    net_vs
        .load(&weights)
        .expect(&format!("Could not load weights file {}", &weights));
    net_vs.freeze();

    let style_img = imagenet::load_image(&style_img)
        .expect(&format!("Could not load the style file {}", &style_img))
        .unsqueeze(0)
        .to_device(device);
    let content_img = imagenet::load_image(&content_img)
        .expect(&format!("Could not load the content file {}", &content_img))
        .unsqueeze(0)
        .to_device(device);
    let max_layer = STYLE_INDEXES.iter().max().unwrap() + 1;
    let style_layers = net.forward_all_t(&style_img, false, Some(max_layer));
    let content_layers = net.forward_all_t(&content_img, false, Some(max_layer));

    let vs = nn::VarStore::new(device);
    let input_var = vs.root().var_copy("img", &content_img);
    let mut opt = nn::Adam::default().build(&vs, LEARNING_RATE)?;

    for step_idx in 1..(1 + TOTAL_STEPS) {
        let input_layers = net.forward_all_t(&input_var, false, Some(max_layer));
        let style_loss: Tensor = STYLE_INDEXES
            .iter()
            .map(|&i| style_loss(&input_layers[i], &style_layers[i]))
            .sum();
        let content_loss: Tensor = CONTENT_INDEXES
            .iter()
            .map(|&i| input_layers[i].mse_loss(&content_layers[i], tch::Reduction::Mean))
            .sum();
        let loss = style_loss * STYLE_WEIGHT + content_loss;
        opt.backward_step(&loss);
        if step_idx % 1000 == 0 {
            println!("{} {}", step_idx, f64::from(loss));
            imagenet::save_image(&input_var, &format!("out{}.jpg", step_idx))?;
        }
    }

    Ok(())
}
