# Supplementary material
Source: ML conference proceedings conference paper supplement (https://proceedings.neurips.cc/paper_files/paper/2021/hash/d367eef13f90793bd8121e2f675f0dc2-Abstract.html)
Supplement: Supplementary file 1 [file d367eef13f90793bd8121e2f675f0dc2-Supplemental.zip › Scallop-Supplementary-camera-ready/code/tch-rs/examples/neural-style-transfer/README.md]

## Neural Style Transfer in Rust

This example shows how to implement
[Neural Style Transfer](https://arxiv.org/abs/1508.06576) using PyTorch and Rust,
it is very close to the
[Neural Transfer using PyTorch tutorial](https://pytorch.org/tutorials/advanced/neural_style_tutorial.html)
which contains far more details.

The Neural Style Transfer algorithm takes as input a content image and a style image and
produces some new images looking similar to the content image but using the style
from the second image.

### Running the Code
We use a pre-trained VGG-16 convolutional network, the weights can be found in
[vgg16.ot](https://github.com/LaurentMazare/ocaml-torch/releases/download/v0.1-unstable/vgg16.ot).
Running the example can be done with the following command, this will create
some new images in the current directory.

```bash
cargo run --example neural-style-transfer style.jpg content.jpg vgg16.ot
```

Here is some example content and output images using [the Starry Night](https://en.wikipedia.org/wiki/The_Starry_Night)
as a style image.

![20 Fenchurch Street](https://raw.githubusercontent.com/LaurentMazare/ocaml-torch/master/examples/neural_transfer/20fen.jpg)
![Starry 20 Fen](https://raw.githubusercontent.com/LaurentMazare/ocaml-torch/master/examples/neural_transfer/20fen-starry.jpg)

([original image source](https://commons.wikimedia.org/wiki/File:Walkie-Talkie_-_Sept_2015.jpg))

### Neural Style Transfer

The Neural Style Transfer algorithm works by gradient descent starting from an
initial image -- we use the content image as a starting point but could also
use random noise.

This gradient descent aims at minimizing a loss composed of two parts: the
style loss evaluates how much our current image is similar to the style image
in terms of style; the content loss focuses on whether our current
image has a content close to the reference content image.

In order to define these distances we use a pre-trained convolutional neural
network. This network is run on the current image as well as on the style and
content images.  Intuitively the features extracted by the lower layers are
more about style and the features extracted by the upper layers about content.

The content loss is computed using the mean-square error on the extracted
features for some upper layers.  This error helps ensuring that the extracted
features happen at the same on-screen places between the content and the
current images.

For the style loss we do not really care about spatial location of the style
features. So rather than the mean-square error we use some Gram matrix to
define a loss that is location independent.

```rust
fn gram_matrix(m: &Tensor) -> Tensor {
    let (a, b, c, d) = m.size4().unwrap();
    let m = m.view(&[a * b, c * d]);
    let g = m.matmul(&m.tr());
    g / (a * b * c * d)
}

fn style_loss(m1: &Tensor, m2: &Tensor) -> Tensor {
    gram_matrix(m1).mse_loss(&gram_matrix(m2), 1)
}
```

### Loading the Model and Images

We start by creating a *device* which can be either a cpu or a gpu depending on
what is available.

```rust
    let device = Device::cuda_if_available();
```

Then we create a variable store on this device, this variable store will be
used to hold the pre-trained variables for the VGG-16 model.  Using this
variable store we create the model and load the weights from the weight file.
Finally we *freeze* the variable store ensuring that the model weights are not
modified when running the optimizer later in the process.

```rust
    let mut net_vs = tch::nn::VarStore::new(device);
    let net = vgg::vgg16(&net_vs.root(), imagenet::CLASS_COUNT);
    net_vs.load(weights_file)?;
    net_vs.freeze();
```

Next we load the style and content image, and move them to the device.  Note
that the `unsqueeze` method is used to add a batch-dimension of size 1 so that
the model can be run on these images.

```rust
    let style_img = imagenet::load_image(style_img)?
        .unsqueeze(0)
        .to_device(device);
    let content_img = imagenet::load_image(content_img)?
        .unsqueeze(0)
        .to_device(device);
```

### Running the Model on the Content and Style Images

We now run the model on the style and content images. These calls returns some
vector containing the extracted features for each of the model layers.
```rust
    let style_layers = net.forward_all_t(&style_img, false, Some(max_layer));
    let content_layers = net.forward_all_t(&content_img, false, Some(max_layer));
```

As we will use gradient descent to optimize an image, we create a second
variable store to hold this image as a variable.  The initial value for this
variable is obtained by copying the content image.

```rust
    let vs = nn::VarStore::new(device);
    let input_var = vs.root().var_copy("img", &content_img);
```

### Gradient Descent Loop

We use Adam for optimization: creating an optimizer requires to pass it the
variable store that we want to optimize on.

```rust
    let opt = nn::Adam::default().build(&vs, LEARNING_RATE)?;
```

In the gradient descent loop the style and content losses are computed,
summed together, and run an Adam optimization step is performed.
We also regularly print the current loss value and write the current image
to a file.

```rust
    for step_idx in 1..(1 + TOTAL_STEPS) {
        // ... compute style_loss and content_loss ...
        let loss = style_loss * STYLE_WEIGHT + content_loss;
        opt.backward_step(&loss);
        if step_idx % 1000 == 0 {
            println!("{} {}", step_idx, f64::from(loss));
            imagenet::save_image(&input_var, &format!("out{}.jpg", step_idx))?;
        }
    }
```

In order to compute the losses, the model is evaluated on the current image.
The style loss is then extracted from the style layers and the content loss from
the content layers.

```rust
        let input_layers = net.forward_all_t(&input_var, false, Some(max_layer));
        let style_loss: Tensor = STYLE_INDEXES
            .iter()
            .map(|&i| style_loss(&input_layers[i], &style_layers[i]))
            .sum();
        let content_loss: Tensor = CONTENT_INDEXES
            .iter()
            .map(|&i| input_layers[i].mse_loss(&content_layers[i], 1))
            .sum();
```
