# Supplementary material
Source: ML conference proceedings conference paper supplement (https://proceedings.neurips.cc/paper_files/paper/2021/hash/d367eef13f90793bd8121e2f675f0dc2-Abstract.html)
Supplement: Supplementary file 1 [file d367eef13f90793bd8121e2f675f0dc2-Supplemental.zip › Scallop-Supplementary-camera-ready/code/tch-rs/examples/reinforcement-learning/ppo.rs]

/* Proximal Policy Optimization (PPO) model.

   Proximal Policy Optimization Algorithms, Schulman et al. 2017
   https://arxiv.org/abs/1707.06347

   See https://spinningup.openai.com/en/latest/algorithms/ppo.html for a
   reference python implementation.
*/
use super::vec_gym_env::VecGymEnv;
use tch::kind::{FLOAT_CPU, INT64_CPU};
use tch::{nn, nn::OptimizerConfig, Kind, Tensor};

const ENV_NAME: &'static str = "SpaceInvadersNoFrameskip-v4";
const NPROCS: i64 = 8;
const NSTEPS: i64 = 256;
const NSTACK: i64 = 4;
const UPDATES: i64 = 1000000;
const OPTIM_BATCHSIZE: i64 = 64;
const OPTIM_EPOCHS: i64 = 4;

fn model(p: &nn::Path, nact: i64) -> Box<dyn Fn(&Tensor) -> (Tensor, Tensor)> {
    let stride = |s| nn::ConvConfig {
        stride: s,
        ..Default::default()
    };
    let seq = nn::seq()
        .add(nn::conv2d(p / "c1", NSTACK, 32, 8, stride(4)))
        .add_fn(|xs| xs.relu())
        .add(nn::conv2d(p / "c2", 32, 64, 4, stride(2)))
        .add_fn(|xs| xs.relu())
        .add(nn::conv2d(p / "c3", 64, 64, 3, stride(1)))
        .add_fn(|xs| xs.relu().flat_view())
        .add(nn::linear(p / "l1", 3136, 512, Default::default()))
        .add_fn(|xs| xs.relu());
    let critic = nn::linear(p / "cl", 512, 1, Default::default());
    let actor = nn::linear(p / "al", 512, nact, Default::default());
    let device = p.device();
    Box::new(move |xs: &Tensor| {
        let xs = xs.to_device(device).apply(&seq);
        (xs.apply(&critic), xs.apply(&actor))
    })
}

#[derive(Debug)]
struct FrameStack {
    data: Tensor,
    nprocs: i64,
    nstack: i64,
}

impl FrameStack {
    fn new(nprocs: i64, nstack: i64) -> FrameStack {
        FrameStack {
            data: Tensor::zeros(&[nprocs, nstack, 84, 84], FLOAT_CPU),
            nprocs,
            nstack,
        }
    }

    fn update<'a>(&'a mut self, img: &Tensor, masks: Option<&Tensor>) -> &'a Tensor {
        if let Some(masks) = masks {
            self.data *= masks.view([self.nprocs, 1, 1, 1])
        };
        let slice = |i| self.data.narrow(1, i, 1);
        for i in 1..self.nstack {
            slice(i - 1).copy_(&slice(i))
        }
        slice(self.nstack - 1).copy_(img);
        &self.data
    }
}

pub fn train() -> cpython::PyResult<()> {
    let env = VecGymEnv::new(ENV_NAME, None, NPROCS)?;
    println!("action space: {}", env.action_space());
    println!("observation space: {:?}", env.observation_space());

    let device = tch::Device::cuda_if_available();
    let vs = nn::VarStore::new(device);
    let model = model(&vs.root(), env.action_space());
    let mut opt = nn::Adam::default().build(&vs, 1e-4).unwrap();

    let mut sum_rewards = Tensor::zeros(&[NPROCS], FLOAT_CPU);
    let mut total_rewards = 0f64;
    let mut total_episodes = 0f64;

    let mut frame_stack = FrameStack::new(NPROCS, NSTACK);
    let _ = frame_stack.update(&env.reset()?, None);
    let s_states = Tensor::zeros(&[NSTEPS + 1, NPROCS, NSTACK, 84, 84], FLOAT_CPU);

    let train_size = NSTEPS * NPROCS;
    for update_index in 0..UPDATES {
        s_states.get(0).copy_(&s_states.get(-1));
        let s_values = Tensor::zeros(&[NSTEPS, NPROCS], FLOAT_CPU);
        let s_rewards = Tensor::zeros(&[NSTEPS, NPROCS], FLOAT_CPU);
        let s_actions = Tensor::zeros(&[NSTEPS, NPROCS], INT64_CPU);
        let s_masks = Tensor::zeros(&[NSTEPS, NPROCS], FLOAT_CPU);
        for s in 0..NSTEPS {
            let (critic, actor) = tch::no_grad(|| model(&s_states.get(s)));
            let probs = actor.softmax(-1, Kind::Float);
            let actions = probs.multinomial(1, true).squeeze1(-1);
            let step = env.step(Vec::<i64>::from(&actions))?;

            sum_rewards += &step.reward;
            total_rewards += f64::from((&sum_rewards * &step.is_done).sum(Kind::Float));
            total_episodes += f64::from(step.is_done.sum(Kind::Float));

            let masks = Tensor::from(1f32) - step.is_done;
            sum_rewards *= &masks;
            let obs = frame_stack.update(&step.obs, Some(&masks));
            s_actions.get(s).copy_(&actions);
            s_values.get(s).copy_(&critic.squeeze1(-1));
            s_states.get(s + 1).copy_(&obs);
            s_rewards.get(s).copy_(&step.reward);
            s_masks.get(s).copy_(&masks);
        }
        let states = s_states
            .narrow(0, 0, NSTEPS)
            .view([train_size, NSTACK, 84, 84]);
        let returns = {
            let r = Tensor::zeros(&[NSTEPS + 1, NPROCS], FLOAT_CPU);
            let critic = tch::no_grad(|| model(&s_states.get(-1)).0);
            r.get(-1).copy_(&critic.view([NPROCS]));
            for s in (0..NSTEPS).rev() {
                let r_s = s_rewards.get(s) + r.get(s + 1) * s_masks.get(s) * 0.99;
                r.get(s).copy_(&r_s);
            }
            r.narrow(0, 0, NSTEPS).view([train_size, 1])
        };
        let actions = s_actions.view([train_size]);
        for _index in 0..OPTIM_EPOCHS {
            let batch_indexes = Tensor::randint(train_size, &[OPTIM_BATCHSIZE], INT64_CPU);
            let states = states.index_select(0, &batch_indexes);
            let actions = actions.index_select(0, &batch_indexes);
            let returns = returns.index_select(0, &batch_indexes);
            let (critic, actor) = model(&states);
            let log_probs = actor.log_softmax(-1, Kind::Float);
            let probs = actor.softmax(-1, Kind::Float);
            let action_log_probs = {
                let index = actions.unsqueeze(-1).to_device(device);
                log_probs.gather(-1, &index, false).squeeze1(-1)
            };
            let dist_entropy = (-log_probs * probs)
                .sum1(&[-1], false, Kind::Float)
                .mean(Kind::Float);
            let advantages = returns.to_device(device) - critic;
            let value_loss = (&advantages * &advantages).mean(Kind::Float);
            let action_loss = (-advantages.detach() * action_log_probs).mean(Kind::Float);
            let loss = value_loss * 0.5 + action_loss - dist_entropy * 0.01;
            opt.backward_step_clip(&loss, 0.5);
        }
        if update_index > 0 && update_index % 25 == 0 {
            println!(
                "{} {:.0} {}",
                update_index,
                total_episodes,
                total_rewards / total_episodes
            );
            total_rewards = 0.;
            total_episodes = 0.;
        }
        if update_index > 0 && update_index % 1000 == 0 {
            if let Err(err) = vs.save(format!("trpo{}.ot", update_index)) {
                println!("error while saving {}", err)
            }
        }
    }
    Ok(())
}

pub fn sample<T: AsRef<std::path::Path>>(weight_file: T) -> cpython::PyResult<()> {
    let env = VecGymEnv::new(ENV_NAME, Some("/dev/shm"), 1)?;
    println!("action space: {}", env.action_space());
    println!("observation space: {:?}", env.observation_space());

    let mut vs = nn::VarStore::new(tch::Device::Cpu);
    let model = model(&vs.root(), env.action_space());
    vs.load(weight_file).unwrap();

    let mut frame_stack = FrameStack::new(1, NSTACK);
    let mut obs = frame_stack.update(&env.reset()?, None);

    for _index in 0..5000 {
        let (_critic, actor) = tch::no_grad(|| model(&obs));
        let probs = actor.softmax(-1, Kind::Float);
        let actions = probs.multinomial(1, true).squeeze1(-1);
        let step = env.step(Vec::<i64>::from(&actions))?;

        let masks = Tensor::from(1f32) - step.is_done;
        obs = frame_stack.update(&step.obs, Some(&masks));
    }
    Ok(())
}
