# Supplementary material
Source: ML conference proceedings conference paper supplement (https://proceedings.neurips.cc/paper_files/paper/2021/hash/d367eef13f90793bd8121e2f675f0dc2-Abstract.html)
Supplement: Supplementary file 1 [file d367eef13f90793bd8121e2f675f0dc2-Supplemental.zip › Scallop-Supplementary-camera-ready/code/tch-rs/examples/reinforcement-learning/README.md]

# Reinforcement Learning Examples

These examples illustrate how to implement a couple reinforcement learning
algorithms to play Atari games.
This uses the [https://github.com/openai/gym](OpenAI Gym) through its Python
api so the gym Python package has to be installed.
The Python library is executed in Rust using
[https://github.com/dgrunwald/rust-cpython](rust-cpython).

The policy gradient example uses the `CartPole-v0` environment. It can be
run using the following command.

```bash
cargo run --example reinforcement-learning  --features=python pg
```

The A2C example can use any Atari game supported in the OpenAI gym.
Training can be launched by running:

```bash
cargo run --example reinforcement-learning  --features=python a2c
```

This produces some weight files in the current directory.

If you get some Python import error when using conda, this can
be related to `rust-cpython` not being able to use the Python
runtime as a shared library. `rust-cpython` uses
`Py_ENABLE_SHARED` to determine the link mode which does not
seem to work properly with conda as reported in this
[https://github.com/conda/conda-build/issues/2738](issue).

## A2C Agent Playing Breakout
[![Breakout](https://img.youtube.com/vi/Zk6j7fC1C6M/0.jpg)](https://www.youtube.com/watch?v=Zk6j7fC1C6M)
## A2C Agent Playing SpaceInvaders
[![SpaceInvaders](https://img.youtube.com/vi/p16n4w3aE8k/0.jpg)](https://www.youtube.com/watch?v=p16n4w3aE8k)
