# Supplementary material
Source: ML conference proceedings conference paper supplement (https://proceedings.neurips.cc/paper_files/paper/2021/hash/d367eef13f90793bd8121e2f675f0dc2-Abstract.html)
Supplement: Supplementary file 1 [file d367eef13f90793bd8121e2f675f0dc2-Supplemental.zip › Scallop-Supplementary-camera-ready/code/tch-rs/examples/tensor-tools.rs]

// A small tensor tool utility.
//
// - List the content of some npy/npz/ot file.
//     tensor-tools ls a.npy b.npz c.ot
//
// - Convert a npz file to an ot file.
//     tensor-tools cp src.npz dst.ot
//   Or the other way around.
//     tensor-tools cp src.ot dst.npz

extern crate tch;

use anyhow::{bail, ensure, Result};

pub fn main() -> Result<()> {
    let args: Vec<_> = std::env::args().collect();
    ensure!(args.len() >= 2, "usage: {} (ls|cp) ...", args[0]);
    match args[1].as_str() {
        "ls" => {
            for filename in args.iter().skip(2) {
                if filename.ends_with(".npy") {
                    let tensor = tch::Tensor::read_npy(filename)?;
                    println!("{}: {:?}", filename, tensor);
                } else if filename.ends_with(".npz") {
                    let tensors = tch::Tensor::read_npz(filename)?;
                    for (name, tensor) in tensors.iter() {
                        println!("{}: {} {:?}", filename, name, tensor)
                    }
                } else if filename.ends_with(".ot") {
                    let tensors = tch::Tensor::load_multi(filename)?;
                    for (name, tensor) in tensors.iter() {
                        println!("{}: {} {:?}", filename, name, tensor)
                    }
                } else {
                    bail!("unhandled file {}", filename);
                }
            }
        }
        "cp" => {
            ensure!(args.len() == 4, "usage: {} cp src.ot dst.npz", args[0]);
            let src_filename = &args[2];
            let dst_filename = &args[3];
            let tensors = if src_filename.ends_with(".npz") {
                tch::Tensor::read_npz(src_filename)?
            } else if src_filename.ends_with(".ot") {
                tch::Tensor::load_multi(src_filename)?
            } else {
                bail!("unhandled file {}", src_filename)
            };
            for (name, tensor) in tensors.iter() {
                println!("{}: {} {:?}", src_filename, name, tensor)
            }
            if dst_filename.ends_with(".npz") {
                tch::Tensor::write_npz(&tensors, dst_filename)?
            } else if dst_filename.ends_with(".ot") {
                tch::Tensor::save_multi(&tensors, dst_filename)?
            } else {
                bail!("unhandled file {}", dst_filename)
            };
        }
        _ => bail!("usage: {} (ls|cp) ...", args[0]),
    }

    Ok(())
}
