# Supplementary material
Source: ML conference proceedings conference paper supplement (https://proceedings.neurips.cc/paper_files/paper/2021/hash/d367eef13f90793bd8121e2f675f0dc2-Abstract.html)
Supplement: Supplementary file 1 [file d367eef13f90793bd8121e2f675f0dc2-Supplemental.zip › Scallop-Supplementary-camera-ready/code/tch-rs/gen/gen.ml]

(* Automatically generate the C++ -> C -> rust bindings.
   This takes as input the Descriptions.yaml file that gets generated when
   building PyTorch from source.

   Run with: dune exec gen/gen.exe
 *)
open Base
open Stdio

let excluded_functions =
  Set.of_list
    (module String)
    [ "multi_margin_loss"
    ; "multi_margin_loss_out"
    ; "log_softmax_backward_data"
    ; "softmax_backward_data"
    ; "clone"
    ; "copy_"
    ; "conv_transpose2d_backward_out"
    ; "conv_transpose3d_backward_out"
    ; "slow_conv_transpose2d_backward_out"
    ; "slow_conv_transpose3d_backward_out"
    ; "slow_conv3d_backward_out"
    ; "normal"
    ; "_cufft_set_plan_cache_max_size"
    ; "_cufft_clear_plan_cache"
    ; "backward"
    ; "set_data"
    ; "_amp_non_finite_check_and_unscale_"
    ; "_cummin_helper"
    ; "_cummax_helper"
    ; "retain_grad"
    ; "_validate_sparse_coo_tensor_args"
    ; "_backward"
    ]

let no_tensor_options =
  Set.of_list
    (module String)
    [ "zeros_like"
    ; "empty_like"
    ; "full_like"
    ; "ones_like"
    ; "rand_like"
    ; "randint_like"
    ; "randn_like"
    ]

let prefixed_functions =
  Set.of_list
    (module String)
    [ "add"; "add_"; "div"; "div_"; "mul"; "mul_"; "sub"; "sub_"; "nll_loss"; "to_mkldnn" ]

let excluded_prefixes = [ "_thnn_"; "_th_"; "thnn_"; "th_"; "_foreach"; "_amp_foreach" ]
let excluded_suffixes = [ "_forward"; "_forward_out" ]
let yaml_error yaml ~msg = Printf.failwithf "%s, %s" msg (Yaml.to_string_exn yaml) ()

let extract_bool = function
  | `Bool b -> b
  | `String "true" -> true
  | `String "false" -> false
  | yaml -> yaml_error yaml ~msg:"expected bool"

let extract_list = function
  | `A l -> l
  | yaml -> yaml_error yaml ~msg:"expected list"

let extract_map = function
  | `O map -> Map.of_alist_exn (module String) map
  | yaml -> yaml_error yaml ~msg:"expected map"

let extract_string = function
  | `String s -> s
  (* The yaml spec for torch uses n which is converted to a bool. *)
  | `Bool b -> if b then "y" else "n"
  | `Float f -> Float.to_string f
  | yaml -> yaml_error yaml ~msg:"expected string"

module Func = struct
  type arg_type =
    | Bool
    | Int64
    | Int64Option
    | Double
    | DoubleOption
    | Tensor
    | TensorOption (* Tensor.t option *)
    | IntList
    | TensorOptList
    | TensorList
    | TensorOptions (* Tensor kind and device *)
    | Scalar
    | ScalarType
    | Device
    | String

  type arg =
    { arg_name : string
    ; arg_type : arg_type
    ; default_value : string option
    }

  type t =
    { name : string
    ; args : arg list
    ; returns : [ `fixed of int | `dynamic ]
    ; (* number of tensors that are returned *)
      kind : [ `function_ | `method_ ]
    }

  let arg_type_of_string str ~is_nullable =
    match String.lowercase str with
    | "bool" -> Some Bool
    | "int64_t" -> Some (if is_nullable then Int64Option else Int64)
    | "double" -> Some (if is_nullable then DoubleOption else Double)
    | "booltensor" | "indextensor" | "tensor" ->
      Some (if is_nullable then TensorOption else Tensor)
    | "tensoroptions" -> Some TensorOptions
    | "intarrayref" | "intlist" -> Some IntList
    | "const c10::list<c10::optional<tensor>> &"  -> Some TensorOptList
    | "tensorlist" -> Some TensorList
    | "device" -> Some Device
    | "scalar" -> Some Scalar
    | "scalartype" -> Some ScalarType
    | "std::string" -> Some String
    | _ -> None

  let c_typed_args_list t =
    List.map t.args ~f:(fun { arg_name; arg_type; _ } ->
        match arg_type with
        | IntList -> Printf.sprintf "int64_t *%s_data, int %s_len" arg_name arg_name
        | TensorOptList
        | TensorList -> Printf.sprintf "tensor *%s_data, int %s_len" arg_name arg_name
        | TensorOptions -> Printf.sprintf "int %s_kind, int %s_device" arg_name arg_name
        | String -> Printf.sprintf "char* %s_ptr, int %s_len" arg_name arg_name
        | Int64Option -> Printf.sprintf "int64_t %s_v, uint8_t %s_null" arg_name arg_name
        | DoubleOption -> Printf.sprintf "double %s_v, uint8_t %s_null" arg_name arg_name
        | otherwise ->
          let simple_type_cstring =
            match otherwise with
            | Bool -> "int"
            | Int64 -> "int64_t"
            | Double -> "double"
            | Tensor -> "tensor"
            | TensorOption -> "tensor"
            | ScalarType -> "int"
            | Device -> "int"
            | Scalar -> "scalar"
            | Int64Option | DoubleOption | String | IntList | TensorOptList | TensorList | TensorOptions
              -> assert false
          in
          Printf.sprintf "%s %s" simple_type_cstring arg_name)
    |> String.concat ~sep:", "

  let c_args_list args =
    List.map args ~f:(fun { arg_name; arg_type; _ } ->
        match arg_type with
        | Scalar | Tensor -> "*" ^ arg_name
        | TensorOption -> Printf.sprintf "(%s ? *%s : torch::Tensor())" arg_name arg_name
        | Bool -> "(bool)" ^ arg_name
        | IntList ->
          Printf.sprintf "torch::IntArrayRef(%s_data, %s_len)" arg_name arg_name
        | String -> Printf.sprintf "std::string(%s_ptr, %s_len)" arg_name arg_name
        | TensorOptList ->
          Printf.sprintf "of_carray_tensor_opt(%s_data, %s_len)" arg_name arg_name
        | TensorList ->
          Printf.sprintf "of_carray_tensor(%s_data, %s_len)" arg_name arg_name
        | TensorOptions ->
          Printf.sprintf
            "at::device(device_of_int(%s_device)).dtype(at::ScalarType(%s_kind))"
            arg_name
            arg_name
        | Int64Option ->
          Printf.sprintf
            "%s_null ? c10::nullopt : c10::optional<int64_t>(%s_v)"
            arg_name
            arg_name
        | DoubleOption ->
          Printf.sprintf
            "%s_null ? c10::nullopt : c10::optional<double>(%s_v)"
            arg_name
            arg_name
        | ScalarType -> Printf.sprintf "at::ScalarType(%s)" arg_name
        | Device -> Printf.sprintf "device_of_int(%s)" arg_name
        | _ -> arg_name)
    |> String.concat ~sep:", "

  let c_call t =
    match t.kind with
    | `function_ -> Printf.sprintf "torch::%s(%s)" t.name (c_args_list t.args)
    | `method_ ->
      (match t.args with
      | head :: tail ->
        Printf.sprintf "%s->%s(%s)" head.arg_name t.name (c_args_list tail)
      | [] ->
        Printf.failwithf "Method calls should have at least one argument %s" t.name ())

  let replace_map =
    Map.of_alist_exn
      (module String)
      [ "t", "tr"; "where", "where_"; "view", "view_"; "unsafe", "unsafe_" ]

  let rust_name name =
    let name =
      Map.find replace_map name
      |> Option.value ~default:name
      |> String.lowercase
      |> String.substr_replace_all ~pattern:"__" ~with_:"_"
    in
    if String.is_prefix name ~prefix:"_" then "internal" ^ name else name

  let c_rust_args_list t =
    List.map t.args ~f:(fun arg ->
        let an = arg.arg_name in
        let single_param = Printf.sprintf "%s_: %s" an in
        match arg.arg_type with
        | Bool -> single_param "c_int"
        | Int64 -> single_param "i64"
        | Double -> single_param "f64"
        | Tensor -> single_param "*mut C_tensor"
        | TensorOption -> single_param "*mut C_tensor"
        | Scalar -> single_param "*mut C_scalar"
        | ScalarType -> single_param "c_int"
        | Device -> single_param "c_int"
        | String -> Printf.sprintf "%s_ptr: *const u8, %s_len: c_int" an an
        | IntList -> Printf.sprintf "%s_data: *const i64, %s_len: c_int" an an
        | TensorOptList ->
          Printf.sprintf "%s_data: *const *mut C_tensor, %s_len: c_int" an an
        | TensorList ->
          Printf.sprintf "%s_data: *const *mut C_tensor, %s_len: c_int" an an
        | Int64Option -> Printf.sprintf "%s_v: i64, %s_null: i8" an an
        | DoubleOption -> Printf.sprintf "%s_v: f64, %s_null: i8" an an
        | TensorOptions -> Printf.sprintf "%s_kind: c_int, %s_device: c_int" an an)
    |> String.concat ~sep:", "

  let self_name = "self"
  let input_name = "input"

  let self_tensor arg =
    match arg.arg_type with
    | Tensor -> String.( = ) arg.arg_name self_name
    | _ -> false

  let input_tensor arg =
    match arg.arg_type with
    | Tensor -> String.( = ) arg.arg_name input_name
    | _ -> false

  let type_parameters t =
    let needs_scalar_parameter =
      List.exists t.args ~f:(fun arg ->
          match arg.arg_type with
          | Scalar -> true
          | _ -> false)
    in
    let needs_type_parameter =
      List.exists t.args ~f:(fun arg ->
          match arg.arg_type with
          | TensorOptList | TensorList | TensorOption -> true
          | _ -> false)
    in
    if needs_type_parameter && needs_scalar_parameter
    then "<T: Borrow<Tensor>, S: Into<Scalar>>"
    else if needs_type_parameter
    then "<T: Borrow<Tensor>>"
    else if needs_scalar_parameter
    then "<S: Into<Scalar>>"
    else ""

  let rust_args_list t =
    match List.partition_tf t.args ~f:self_tensor with
    | [ self ], args_list -> Some self, args_list
    | _, _ ->
      (match List.partition_tf t.args ~f:input_tensor with
      | [ self ], args_list -> Some self, args_list
      | _, _ -> None, t.args)

  let rust_typed_args_list t =
    let to_string args =
      List.map args ~f:(fun arg ->
          let rust_arg_type =
            match arg.arg_type with
            | Bool -> "bool"
            | Int64 ->
              if String.( = ) arg.arg_name "reduction" then "crate::Reduction" else "i64"
            | Double -> "f64"
            | Tensor -> "&Tensor"
            | TensorOption -> "Option<T>"
            | IntList -> "&[i64]"
            | TensorOptList -> "&[Option<T>]"
            | TensorList -> "&[T]"
            | String -> "&str"
            | TensorOptions -> "(Kind, Device)"
            | Int64Option -> "impl Into<Option<i64>>"
            | DoubleOption -> "impl Into<Option<f64>>"
            | Scalar -> "S"
            | ScalarType -> "Kind"
            | Device -> "Device"
          in
          Printf.sprintf "%s: %s" (rust_name arg.arg_name) rust_arg_type)
      |> String.concat ~sep:", "
    in
    let self_arg = if String.is_suffix t.name ~suffix:"_" then "&mut self" else "&self" in
    match List.partition_tf t.args ~f:self_tensor with
    | [ self ], args_list ->
      Some self.arg_name, Printf.sprintf "%s, %s" self_arg (to_string args_list)
    | _, _ ->
      (match List.partition_tf t.args ~f:input_tensor with
      | [ self ], args_list ->
        Some self.arg_name, Printf.sprintf "%s, %s" self_arg (to_string args_list)
      | _, _ -> None, to_string t.args)

  let rust_return_type t ~fallible =
    let returns =
      match t.returns with
      | `fixed 1 -> "Tensor"
      | `fixed v ->
        List.init v ~f:(fun _ -> "Tensor")
        |> String.concat ~sep:", "
        |> Printf.sprintf "(%s)"
      | `dynamic -> "Vec<Tensor>"
    in
    if fallible
    then Printf.sprintf " -> Result<%s, TchError>" returns
    else Printf.sprintf " -> %s" returns

  let rust_binding_args t ~self =
    List.map t.args ~f:(fun arg ->
        let name =
          if Option.value_map self ~default:false ~f:(String.( = ) arg.arg_name)
          then "self"
          else rust_name arg.arg_name
        in
        match arg.arg_type with
        | Tensor -> Printf.sprintf "%s.c_tensor" name
        | Scalar -> Printf.sprintf "%s.into().c_scalar" name
        | Bool -> Printf.sprintf "if %s { 1 } else { 0 }" name
        | ScalarType -> Printf.sprintf "%s.c_int()" name
        | Device -> Printf.sprintf "%s.c_int()" name
        | TensorOptions -> Printf.sprintf "%s.0.c_int(), %s.1.c_int()" name name
        | Int64Option -> Printf.sprintf "%s.unwrap_or(0i64), %s.is_none() as i8" name name
        | DoubleOption ->
          Printf.sprintf "%s.unwrap_or(std::f64::NAN), %s.is_none() as i8" name name
        | String -> Printf.sprintf "%s.as_ptr(), %s.len() as i32" name name
        | IntList -> Printf.sprintf "%s.as_ptr(), %s.len() as i32" name name
        | TensorOptList -> Printf.sprintf "ptr_list_opt(%s).as_ptr(), %s.len() as i32" name name
        | TensorList -> Printf.sprintf "ptr_list(%s).as_ptr(), %s.len() as i32" name name
        | TensorOption ->
          Printf.sprintf "%s.map_or(std::ptr::null_mut(), |t| t.borrow().c_tensor)" name
        | Int64 when String.( = ) name "reduction" -> "reduction.to_int()"
        | _ -> name)
    |> String.concat ~sep:",\n                "
end

exception Not_a_simple_arg

let read_yaml filename =
  let funcs =
    (* Split the file to avoid Yaml.of_string_exn segfaulting. *)
    In_channel.with_file filename ~f:In_channel.input_lines
    |> List.group ~break:(fun _ l -> String.length l > 0 && Char.( = ) l.[0] '-')
    |> List.concat_map ~f:(fun lines ->
           Yaml.of_string_exn (String.concat lines ~sep:"\n") |> extract_list)
  in
  printf "Read %s, got %d functions.\n%!" filename (List.length funcs);
  List.filter_map funcs ~f:(fun yaml ->
      let map = extract_map yaml in
      let name = Map.find_exn map "name" |> extract_string in
      let deprecated = Map.find_exn map "deprecated" |> extract_bool in
      let method_of =
        Map.find_exn map "method_of" |> extract_list |> List.map ~f:extract_string
      in
      let arguments = Map.find_exn map "arguments" |> extract_list in
      let returns =
        let is_tensor returns =
          let returns = extract_map returns in
          let return_type = Map.find_exn returns "dynamic_type" |> extract_string in
          String.( = ) return_type "Tensor"
          || String.( = ) return_type "BoolTensor"
          || String.( = ) return_type "IndexTensor"
        in
        let returns = Map.find_exn map "returns" |> extract_list in
        if List.for_all returns ~f:is_tensor
        then Some (`fixed (List.length returns))
        else (
          match returns with
          | [ returns ] ->
            let return_type =
              Map.find_exn (extract_map returns) "dynamic_type" |> extract_string
            in
            if String.( = ) return_type "TensorList"
               || String.( = )
                    return_type
                    "dynamic_type: const c10::List<c10::optional<Tensor>> &"
            then Some `dynamic
            else None
          | [] | _ :: _ :: _ -> None)
      in
      let kind =
        if List.exists method_of ~f:(String.( = ) "namespace")
        then Some `function_
        else if List.exists method_of ~f:(String.( = ) "Tensor")
        then Some `method_
        else None
      in
      if (not deprecated)
         && (not
               (List.exists excluded_prefixes ~f:(fun prefix ->
                    String.is_prefix name ~prefix)))
         && (not
               (List.exists excluded_suffixes ~f:(fun suffix ->
                    String.is_suffix name ~suffix)))
         && not (Set.mem excluded_functions name)
      then
        Option.both returns kind
        |> Option.bind ~f:(fun (returns, kind) ->
               try
                 let args =
                   List.filter_map arguments ~f:(fun arg ->
                       let arg = extract_map arg in
                       let arg_name = Map.find_exn arg "name" |> extract_string in
                       let arg_type = Map.find_exn arg "dynamic_type" |> extract_string in
                       let is_nullable =
                         Map.find arg "is_nullable"
                         |> Option.value_map ~default:false ~f:extract_bool
                       in
                       let default_value =
                         Map.find arg "default" |> Option.map ~f:extract_string
                       in
                       match Func.arg_type_of_string arg_type ~is_nullable with
                       | Some Scalar when Option.is_some default_value && not is_nullable
                         -> None
                       | Some TensorOptions
                         when Option.is_some default_value
                              && Set.mem no_tensor_options name -> None
                       | Some arg_type ->
                         let arg_name =
                           match arg_name, arg_type with
                           | "self", Scalar -> "self_scalar"
                           | _, _ -> arg_name
                         in
                         Some { Func.arg_name; arg_type; default_value }
                       | None ->
                         if Option.is_some default_value
                         then None
                         else raise Not_a_simple_arg)
                 in
                 Some { Func.name; args; returns; kind }
               with
               | Not_a_simple_arg -> None)
      else None)

let p out_channel s =
  Printf.ksprintf
    (fun line ->
      Out_channel.output_string out_channel line;
      Out_channel.output_char out_channel '\n')
    s

let write_cpp funcs filename =
  Out_channel.with_file (filename ^ ".cpp.h") ~f:(fun out_cpp ->
      Out_channel.with_file (filename ^ ".h") ~f:(fun out_h ->
          let pc s = p out_cpp s in
          let ph s = p out_h s in
          pc "// THIS FILE IS AUTOMATICALLY GENERATED, DO NOT EDIT BY HAND!";
          pc "";
          ph "// THIS FILE IS AUTOMATICALLY GENERATED, DO NOT EDIT BY HAND!";
          ph "";
          Map.iteri funcs ~f:(fun ~key:exported_name ~data:func ->
              let c_typed_args_list = Func.c_typed_args_list func in
              match func.returns with
              | `fixed ntensors ->
                pc "void atg_%s(tensor *out__, %s) {" exported_name c_typed_args_list;
                pc "  PROTECT(";
                pc "    auto outputs__ = %s;" (Func.c_call func);
                if ntensors = 1
                then pc "    out__[0] = new torch::Tensor(outputs__);"
                else
                  for i = 0 to ntensors - 1 do
                    pc "    out__[%d] = new torch::Tensor(std::get<%d>(outputs__));" i i
                  done;
                pc "  )";
                pc "}";
                pc "";
                ph "void atg_%s(tensor *, %s);" exported_name c_typed_args_list
              | `dynamic ->
                pc "tensor *atg_%s(%s) {" exported_name c_typed_args_list;
                pc "  PROTECT(";
                pc "    auto outputs__ = %s;" (Func.c_call func);
                (* the returned type is a C++ vector of tensors *)
                pc "    int sz = outputs__.size();";
                pc
                  "    torch::Tensor **out__ = (torch::Tensor**)malloc((sz + 1) * \
                   sizeof(torch::Tensor*));";
                pc "    for (int i = 0; i < sz; ++i)";
                pc "      out__[i] = new torch::Tensor(outputs__[i]);";
                pc "    out__[sz] = nullptr;";
                pc "    return out__;";
                pc "  )";
                pc "  return nullptr;";
                pc "}";
                pc "";
                ph "tensor *atg_%s(%s);" exported_name c_typed_args_list)))

let write_fallible_wrapper funcs filename =
  Out_channel.with_file filename ~f:(fun out_ml ->
      let pm s = p out_ml s in
      pm "/* THIS FILE IS AUTOMATICALLY GENERATED, DO NOT EDIT BY HAND! */";
      pm "#[allow(clippy::all)]";
      pm "use torch_sys::*;";
      pm "use torch_sys::c_generated::*;";
      pm "use crate::{Device, Kind, Scalar, TchError, Tensor};";
      pm "use std::convert::Into;";
      pm "use std::borrow::Borrow;";
      pm "";
      pm "fn ptr_list_opt<T: Borrow<Tensor>>(l: &[Option<T>]) -> Vec<*mut C_tensor> {";
      pm "    l.iter().map(|x| x.as_ref().map_or(std::ptr::null_mut(), |x| x.borrow().c_tensor)).collect()";
      pm "}";
      pm "";
      pm "fn ptr_list<T: Borrow<Tensor>>(l: &[T]) -> Vec<*mut C_tensor> {";
      pm "    l.iter().map(|x| x.borrow().c_tensor).collect()";
      pm "}";
      pm "";
      pm "impl Tensor {";
      Map.iteri funcs ~f:(fun ~key:exported_name ~data:(func : Func.t) ->
          let rust_name = Func.rust_name exported_name in
          let self, rust_args_list = Func.rust_typed_args_list func in
          pm "";
          pm "    pub fn f_%s%s(" rust_name (Func.type_parameters func);
          pm "        %s" rust_args_list;
          pm "    )%s {" (Func.rust_return_type func ~fallible:true);
          List.iter func.args ~f:(fun arg ->
              match arg.arg_type with
              | DoubleOption | Int64Option ->
                pm "        let %s = %s.into();" arg.arg_name arg.arg_name
              | _ -> ());
          match func.returns with
          | `dynamic ->
            pm "        let c_tensors = unsafe_torch_err!(";
            pm "            atg_%s(" exported_name;
            pm "                %s));" (Func.rust_binding_args func ~self);
            pm "        let mut r__ = vec![];";
            pm "        let mut i = 0;";
            pm "        loop {";
            pm "            let c__ = unsafe{*c_tensors.add(i)};";
            pm "            if c__.is_null() { break }";
            pm "            r__.push(Tensor {c_tensor: c__});";
            pm "            i += 1;";
            pm "        }";
            pm "        unsafe{libc::free(c_tensors as *mut libc::c_void)}";
            pm "        Ok(r__)";
            pm "    }"
          | `fixed ntensors ->
            pm "        let mut c_tensors = [std::ptr::null_mut(); %d];" ntensors;
            pm "        unsafe_torch_err!(";
            pm "            atg_%s(c_tensors.as_mut_ptr()," exported_name;
            pm "                %s" (Func.rust_binding_args func ~self);
            pm "            ));";
            let returns =
              if ntensors = 1
              then "Tensor { c_tensor: c_tensors[0] }"
              else
                List.init
                  ntensors
                  ~f:(Printf.sprintf "Tensor { c_tensor: c_tensors[%d] }")
                |> String.concat ~sep:", "
                |> Printf.sprintf "(%s)"
            in
            pm "        Ok(%s)" returns;
            pm "    }");
      pm "}")

let write_wrapper funcs filename =
  Out_channel.with_file filename ~f:(fun out_ml ->
      let pm s = p out_ml s in
      pm "/* THIS FILE IS AUTOMATICALLY GENERATED, DO NOT EDIT BY HAND! */";
      pm "#[allow(clippy::all)]";
      pm "use crate::{Device, Kind, Scalar, Tensor};";
      pm "use std::convert::Into;";
      pm "use std::borrow::Borrow;";
      pm "";
      pm "impl Tensor {";
      Map.iteri funcs ~f:(fun ~key:exported_name ~data:(func : Func.t) ->
          let rust_name = Func.rust_name exported_name in
          let rust_name, fallible_rust_name =
            if Set.mem prefixed_functions func.name
            then "g_" ^ rust_name, "f_" ^ rust_name
            else rust_name, "f_" ^ rust_name
          in
          pm "";
          pm "    pub fn %s%s(" rust_name (Func.type_parameters func);
          let _self, rust_args_list = Func.rust_typed_args_list func in
          pm "        %s" rust_args_list;
          pm "    )%s {" (Func.rust_return_type func ~fallible:false);
          let self, rust_args_list = Func.rust_args_list func in
          let self = if Option.is_some self then "self." else "Tensor::" in
          let rust_args_list =
            List.map rust_args_list ~f:(fun arg -> Func.rust_name arg.Func.arg_name)
            |> String.concat ~sep:", "
          in
          pm "        %s%s(%s).unwrap()" self fallible_rust_name rust_args_list;
          pm "    }");
      pm "}")

let write_ffi funcs filename =
  Out_channel.with_file filename ~f:(fun out_ml ->
      let pm s = p out_ml s in
      pm "/* THIS FILE IS AUTOMATICALLY GENERATED, DO NOT EDIT BY HAND! */";
      pm "#[allow(clippy::all)]";
      pm "use crate::{C_scalar, C_tensor};";
      pm "use libc::c_int;";
      pm "";
      pm "extern \"C\" {";
      Map.iteri funcs ~f:(fun ~key:exported_name ~data:func ->
          match func.Func.returns with
          | `fixed _ ->
            pm
              "    pub fn atg_%s(out__: *mut *mut C_tensor, %s);"
              exported_name
              (Func.c_rust_args_list func)
          | `dynamic ->
            pm
              "    pub fn atg_%s(%s) -> *mut *mut C_tensor;"
              exported_name
              (Func.c_rust_args_list func));
      pm "}")

let methods =
  let c name args = { Func.name; args; returns = `fixed 1; kind = `method_ } in
  let ca arg_name arg_type = { Func.arg_name; arg_type; default_value = None } in
  [ c "grad" [ ca "self" Tensor ]
  ; c "set_requires_grad" [ ca "self" Tensor; ca "r" Bool ]
  ; c "toType" [ ca "self" Tensor; ca "scalar_type" ScalarType ]
  ; c "to" [ ca "self" Tensor; ca "device" Device ]
  ]

let run
    ~yaml_filename
    ~cpp_filename
    ~ffi_filename
    ~wrapper_filename
    ~fallible_wrapper_filename
  =
  let funcs = read_yaml yaml_filename in
  let funcs = methods @ funcs in
  printf "Generating code for %d functions.\n%!" (List.length funcs);
  (* Generate some unique names for overloaded functions. *)
  let funcs =
    List.map funcs ~f:(fun func -> String.lowercase func.name, func)
    |> Map.of_alist_multi (module String)
    |> Map.to_alist
    |> List.concat_map ~f:(fun (name, funcs) ->
           match funcs with
           | [] -> assert false
           | [ func ] -> [ name, func ]
           | funcs ->
             List.sort funcs ~compare:(fun (f1 : Func.t) (f2 : Func.t) ->
                 Int.compare (List.length f1.args) (List.length f2.args))
             |> List.mapi ~f:(fun i func ->
                    (if i = 0 then name else Printf.sprintf "%s%d" name i), func))
    |> Map.of_alist_exn (module String)
  in
  write_cpp funcs cpp_filename;
  write_ffi funcs ffi_filename;
  write_wrapper funcs wrapper_filename;
  write_fallible_wrapper funcs fallible_wrapper_filename

let () =
  run
    ~yaml_filename:"third_party/pytorch/Declarations-v1.8.0.yaml"
    ~cpp_filename:"torch-sys/libtch/torch_api_generated"
    ~ffi_filename:"torch-sys/src/c_generated.rs"
    ~wrapper_filename:"src/wrappers/tensor_generated.rs"
    ~fallible_wrapper_filename:"src/wrappers/tensor_fallible_generated.rs"
