# Supplementary material
Source: ML conference proceedings conference paper supplement (https://proceedings.neurips.cc/paper_files/paper/2021/hash/d367eef13f90793bd8121e2f675f0dc2-Abstract.html)
Supplement: Supplementary file 1 [file d367eef13f90793bd8121e2f675f0dc2-Supplemental.zip › Scallop-Supplementary-camera-ready/code/tch-rs/Makefile]

test: .FORCE
	cargo test

clean: .FORCE
	cargo clean

gen: .FORCE
	dune exec gen/gen.exe
	rustfmt src/wrappers/tensor_fallible_generated.rs
	rustfmt src/wrappers/tensor_generated.rs
	rustfmt torch-sys/src/c_generated.rs

.FORCE:
