# Supplementary material
Source: ML conference proceedings conference paper supplement (https://proceedings.neurips.cc/paper_files/paper/2021/hash/d367eef13f90793bd8121e2f675f0dc2-Abstract.html)
Supplement: Supplementary file 1 [file d367eef13f90793bd8121e2f675f0dc2-Supplemental.zip › Scallop-Supplementary-camera-ready/code/tch-rs/README.md]

# tch-rs
Rust bindings for the C++ api of PyTorch. The goal of the `tch` crate is to
provide some thin wrappers around the C++ PyTorch api (a.k.a. libtorch). It
aims at staying as close as possible to the original C++ api. More idiomatic
rust bindings could then be developed on top of this. The
[documentation](https://docs.rs/tch/) can be found on docs.rs.

[![Build Status](https://github.com/LaurentMazare/tch-rs/workflows/Continuous%20integration/badge.svg)](https://github.com/LaurentMazare/tch-rs/actions)
[![Latest version](https://img.shields.io/crates/v/tch.svg)](https://crates.io/crates/tch)
[![Documentation](https://docs.rs/tch/badge.svg)](https://docs.rs/tch)
![License](https://img.shields.io/crates/l/tch.svg)


The code generation part for the C api on top of libtorch comes from
[ocaml-torch](https://github.com/LaurentMazare/ocaml-torch).

## Getting Started

This crate requires the C++ PyTorch library (libtorch) in version *v1.8.1* to be available on
your system. You can either:

- Use the system-wide libtorch installation (default).
- Install libtorch manually and let the build script know about it via the `LIBTORCH` environment variable.
- When a system-wide libtorch can't be found and `LIBTORCH` is not set, the build script will download a pre-built binary version
of libtorch. By default a CPU version is used. The `TORCH_CUDA_VERSION` environment variable
can be set to `cu111` in order to get a pre-built binary using CUDA 11.1.

### System-wide Libtorch

The build script will look for a system-wide libtorch library in the following locations:
- In Linux: `/usr/lib/libtorch.so`

### Libtorch Manual Install

- Get `libtorch` from the
[PyTorch website download section](https://pytorch.org/get-started/locally/) and extract
the content of the zip file.
- For Linux users, add the following to your `.bashrc` or equivalent, where `/path/to/libtorch`
is the path to the directory that was created when unzipping the file.
```bash
export LIBTORCH=/path/to/libtorch
export LD_LIBRARY_PATH=${LIBTORCH}/lib:$LD_LIBRARY_PATH
```
- For Windows users, assuming that `X:\path\to\libtorch` is the unzipped libtorch directory.
    - Navigate to Control Panel -> View advanced system settings -> Environment variables.
    - Create the `LIBTORCH` variable and set it to `X:\path\to\libtorch`.
    - Append `X:\path\to\libtorch\lib` to the `Path` variable.

  If you prefer to temporarily set environment variables, in PowerShell you can run
```powershell
$Env:LIBTORCH = "X:\path\to\libtorch"
$Env:Path += ";X:\path\to\libtorch\lib"
```
- You should now be able to run some examples, e.g. `cargo run --example basics`.

### Windows Specific Notes

As per [the pytorch docs](https://pytorch.org/cppdocs/installing.html) the Windows debug and release builds are not ABI-compatible. This could lead to some segfaults if the incorrect version of libtorch is used.

## Examples

### Basic Tensor Operations

This crate provides a tensor type which wraps PyTorch tensors. Here is a minimal
example of how to perform some tensor operations.

```rust
extern crate tch;
use tch::Tensor;

fn main() {
    let t = Tensor::of_slice(&[3, 1, 4, 1, 5]);
    let t = t * 2;
    t.print();
}
```

### Training a Model via Gradient Descent

PyTorch provides automatic differentiation for most tensor operations
it supports. This is commonly used to train models using gradient
descent. The optimization is performed over variables which are created
via a `nn::VarStore` by defining their shapes and initializations.

In the example below `my_module` uses two variables `x1` and `x2`
which initial values are 0. The forward pass applied to tensor `xs`
returns `xs * x1 + exp(xs) * x2`.

Once the model has been generated, a `nn::Sgd` optimizer is created.
Then on each step of the training loop:

- The forward pass is applied to a mini-batch of data.
- A loss is computed as the mean square error between the model output and the mini-batch ground truth.
- Finally an optimization step is performed: gradients are computed and variables from the `VarStore` are modified accordingly.


```rust
extern crate tch;
use tch::nn::{Module, OptimizerConfig};
use tch::{kind, nn, Device, Tensor};

fn my_module(p: nn::Path, dim: i64) -> impl nn::Module {
    let x1 = p.zeros("x1", &[dim]);
    let x2 = p.zeros("x2", &[dim]);
    nn::func(move |xs| xs * &x1 + xs.exp() * &x2)
}

fn gradient_descent() {
    let vs = nn::VarStore::new(Device::Cpu);
    let my_module = my_module(vs.root(), 7);
    let mut opt = nn::Sgd::default().build(&vs, 1e-2).unwrap();
    for _idx in 1..50 {
        // Dummy mini-batches made of zeros.
        let xs = Tensor::zeros(&[7], kind::FLOAT_CPU);
        let ys = Tensor::zeros(&[7], kind::FLOAT_CPU);
        let loss = (my_module.forward(&xs) - ys).pow(2).sum(kind::Kind::Float);
        opt.backward_step(&loss);
    }
}
```

### Writing a Simple Neural Network

The `nn` api can be used to create neural network architectures, e.g. the following code defines
a simple model with one hidden layer and trains it on the MNIST dataset using the Adam optimizer.

```rust
extern crate anyhow;
extern crate tch;
use anyhow::Result;
use tch::{nn, nn::Module, nn::OptimizerConfig, Device};

const IMAGE_DIM: i64 = 784;
const HIDDEN_NODES: i64 = 128;
const LABELS: i64 = 10;

fn net(vs: &nn::Path) -> impl Module {
    nn::seq()
        .add(nn::linear(
            vs / "layer1",
            IMAGE_DIM,
            HIDDEN_NODES,
            Default::default(),
        ))
        .add_fn(|xs| xs.relu())
        .add(nn::linear(vs, HIDDEN_NODES, LABELS, Default::default()))
}

pub fn run() -> Result<()> {
    let m = tch::vision::mnist::load_dir("data")?;
    let vs = nn::VarStore::new(Device::Cpu);
    let net = net(&vs.root());
    let mut opt = nn::Adam::default().build(&vs, 1e-3)?;
    for epoch in 1..200 {
        let loss = net
            .forward(&m.train_images)
            .cross_entropy_for_logits(&m.train_labels);
        opt.backward_step(&loss);
        let test_accuracy = net
            .forward(&m.test_images)
            .accuracy_for_logits(&m.test_labels);
        println!(
            "epoch: {:4} train loss: {:8.5} test acc: {:5.2}%",
            epoch,
            f64::from(&loss),
            100. * f64::from(&test_accuracy),
        );
    }
    Ok(())
}
```

More details on the training loop can be found in the
[detailed tutorial](https://github.com/LaurentMazare/tch-rs/tree/master/examples/mnist).

### Using some Pre-Trained Model

The [pretrained-models  example](https://github.com/LaurentMazare/tch-rs/tree/master/examples/pretrained-models/main.rs)
illustrates how to use some pre-trained computer vision model on an image.
The weights - which have been extracted from the PyTorch implementation - can be
downloaded here [resnet18.ot](https://github.com/LaurentMazare/ocaml-torch/releases/download/v0.1-unstable/resnet18.ot)
and here [resnet34.ot](https://github.com/LaurentMazare/ocaml-torch/releases/download/v0.1-unstable/resnet34.ot).

The example can then be run via the following command:
```bash
cargo run --example pretrained-models -- resnet18.ot tiger.jpg
```
This should print the top 5 imagenet categories for the image. The code for this example is pretty simple.

```rust
    // First the image is loaded and resized to 224x224.
    let image = imagenet::load_image_and_resize(image_file)?;

    // A variable store is created to hold the model parameters.
    let vs = tch::nn::VarStore::new(tch::Device::Cpu);

    // Then the model is built on this variable store, and the weights are loaded.
    let resnet18 = tch::vision::resnet::resnet18(vs.root(), imagenet::CLASS_COUNT);
    vs.load(weight_file)?;

    // Apply the forward pass of the model to get the logits and convert them
    // to probabilities via a softmax.
    let output = resnet18
        .forward_t(&image.unsqueeze(0), /*train=*/ false)
        .softmax(-1);

    // Finally print the top 5 categories and their associated probabilities.
    for (probability, class) in imagenet::top(&output, 5).iter() {
        println!("{:50} {:5.2}%", class, 100.0 * probability)
    }
```


Further examples include:
* A simplified version of
  [char-rnn](https://github.com/LaurentMazare/tch-rs/blob/master/examples/char-rnn)
  illustrating character level language modeling using Recurrent Neural Networks.
* [Neural style transfer](https://github.com/LaurentMazare/tch-rs/blob/master/examples/neural-style-transfer)
  uses a pre-trained VGG-16 model to compose an image in the style of another image (pre-trained weights:
  [vgg16.ot](https://github.com/LaurentMazare/ocaml-torch/releases/download/v0.1-unstable/vgg16.ot)).
* Some [ResNet examples on CIFAR-10](https://github.com/LaurentMazare/tch-rs/tree/master/examples/cifar).
* A [tutorial](https://github.com/LaurentMazare/tch-rs/tree/master/examples/jit)
  showing how to deploy/run some Python trained models using
  [TorchScript JIT](https://pytorch.org/docs/stable/jit.html).
* Some [Reinforcement Learning](https://github.com/LaurentMazare/tch-rs/blob/master/examples/reinforcement-learning)
  examples using the [OpenAI Gym](https://github.com/openai/gym) environment. This includes a policy gradient
  example as well as an A2C implementation that can run on Atari games.
* A [Transfer Learning Tutorial](https://github.com/LaurentMazare/tch-rs/blob/master/examples/transfer-learning)
  shows how to finetune a pre-trained ResNet model on a very small dataset.

External material:
* A [tutorial](http://vegapit.com/article/how-to-use-torch-in-rust-with-tch-rs) showing how to use Torch to compute option prices and greeks.

## License
`tch-rs` is distributed under the terms of both the MIT license
and the Apache license (version 2.0), at your option.

See [LICENSE-APACHE](LICENSE-APACHE), [LICENSE-MIT](LICENSE-MIT) for more
details.
