# Supplementary material
Source: ML conference proceedings conference paper supplement (https://proceedings.neurips.cc/paper_files/paper/2021/hash/d367eef13f90793bd8121e2f675f0dc2-Abstract.html)
Supplement: Supplementary file 1 [file d367eef13f90793bd8121e2f675f0dc2-Supplemental.zip › Scallop-Supplementary-camera-ready/code/tch-rs/tests/autocast.rs]

#[cfg(test)]
#[cfg(feature = "cuda-tests")]
mod tests {
    use tch::{autocast, Device, Kind, Tensor};

    #[test]
    fn autocast_narrows_type() {
        let device = Device::Cuda(0);

        let linear = Tensor::rand(&[10, 10], (Kind::Float, device));
        let input = Tensor::rand(&[10], (Kind::Float, device));

        autocast(true, || {
            let output1 = autocast(false, || linear.matmul(&input));
            assert_eq!(output1.kind(), Kind::Float);
            let output2 = linear.matmul(&output1);
            assert_eq!(output2.kind(), Kind::Half);
            let output3 = autocast(false, || linear.matmul(&output1));
            assert_eq!(output3.kind(), Kind::Float);
        });
    }
}
