# Supplementary material
Source: ML conference proceedings conference paper supplement (https://proceedings.neurips.cc/paper_files/paper/2021/hash/d367eef13f90793bd8121e2f675f0dc2-Abstract.html)
Supplement: Supplementary file 1 [file d367eef13f90793bd8121e2f675f0dc2-Supplemental.zip › Scallop-Supplementary-camera-ready/code/tch-rs/tests/device_tests.rs]

use tch::{Device, Tensor};

#[test]
fn tensor_device() {
    let t = Tensor::of_slice(&[3, 1, 4]);
    assert_eq!(t.device(), Device::Cpu)
}
