# Supplementary material
Source: ML conference proceedings conference paper supplement (https://proceedings.neurips.cc/paper_files/paper/2021/hash/d367eef13f90793bd8121e2f675f0dc2-Abstract.html)
Supplement: Supplementary file 1 [file d367eef13f90793bd8121e2f675f0dc2-Supplemental.zip › Scallop-Supplementary-camera-ready/code/tch-rs/tests/nn_tests.rs]

use tch::nn::layer_norm;
use tch::nn::{Module, OptimizerConfig};
use tch::{kind, nn, Device, Kind, Reduction, Tensor};

#[test]
fn optimizer_test() {
    tch::manual_seed(42);
    // Create some linear data.
    let xs = Tensor::of_slice(&(1..15).collect::<Vec<_>>())
        .to_kind(Kind::Float)
        .view([-1, 1]);
    let ys = &xs * 0.42 + 1.337;

    // Fit a linear model (with deterministic initialization) on the data.
    let vs = nn::VarStore::new(Device::Cpu);
    let mut opt = nn::Sgd::default().build(&vs, 0.).unwrap();
    let cfg = nn::LinearConfig {
        ws_init: nn::Init::Const(0.),
        bs_init: Some(nn::Init::Const(0.)),
        bias: true,
    };
    let mut linear = nn::linear(vs.root(), 1, 1, cfg);

    let loss = xs.apply(&linear).mse_loss(&ys, Reduction::Mean);
    let initial_loss = f64::from(&loss);
    assert!(initial_loss > 1.0, "initial loss {}", initial_loss);

    opt.set_lr(1e-2);
    // Optimization loop.
    for _idx in 1..50 {
        let loss = xs.apply(&linear).mse_loss(&ys, Reduction::Mean);
        opt.backward_step(&loss);
    }
    let loss = xs.apply(&linear).mse_loss(&ys, Reduction::Mean);
    let final_loss = f64::from(loss);
    assert!(final_loss < 0.25, "final loss {}", final_loss);

    // Reset the weights to their initial values.
    tch::no_grad(|| {
        linear.ws.init(nn::Init::Const(0.));
        linear.bs.init(nn::Init::Const(0.));
    });
    let initial_loss2 = f64::from(xs.apply(&linear).mse_loss(&ys, Reduction::Mean));
    assert_eq!(initial_loss, initial_loss2);

    // Set the learning-rate to be very small and check that the loss does not change
    // much.
    opt.set_lr(1e-10);
    for _idx in 1..50 {
        let loss = xs.apply(&linear).mse_loss(&ys, Reduction::Mean);
        opt.backward_step(&loss);
    }
    let loss = xs.apply(&linear).mse_loss(&ys, Reduction::Mean);
    let final_loss = f64::from(loss);
    assert!(
        (final_loss - initial_loss) < 1e-5,
        "final loss {}",
        final_loss
    )
}

fn my_module(p: nn::Path, dim: i64) -> impl nn::Module {
    let x1 = p.zeros("x1", &[dim]);
    let x2 = p.zeros("x2", &[dim]);
    nn::func(move |xs| xs * &x1 + xs.exp() * &x2)
}

#[test]
fn gradient_descent_test() {
    let vs = nn::VarStore::new(Device::Cpu);
    let my_module = my_module(vs.root(), 7);
    let mut opt = nn::Sgd::default().build(&vs, 1e-2).unwrap();
    for _idx in 1..50 {
        let xs = Tensor::zeros(&[7], kind::FLOAT_CPU);
        let ys = Tensor::zeros(&[7], kind::FLOAT_CPU);
        let loss = (my_module.forward(&xs) - ys).pow(2).sum(Kind::Float);
        opt.backward_step(&loss);
    }
}

#[test]
fn gradient_descent_test_clip_norm() {
    let vs = nn::VarStore::new(Device::Cpu);
    let my_module = my_module(vs.root(), 7);
    let mut opt = nn::Sgd::default().build(&vs, 1e-2).unwrap();
    for _idx in 1..50 {
        let xs = Tensor::zeros(&[7], kind::FLOAT_CPU);
        let ys = Tensor::ones(&[7], kind::FLOAT_CPU);
        let loss = (my_module.forward(&xs) - ys).pow(2).sum(Kind::Float);
        opt.backward_step_clip_norm(&loss, 0.1);
    }
}

fn round4(t: Tensor) -> Vec<f64> {
    let v = Vec::<f64>::from(t);
    v.iter().map(|x| (10000. * x).round() / 10000.).collect()
}

#[test]
fn gradient_clip_test() {
    let vs = nn::VarStore::new(Device::Cpu);
    let mut opt = nn::Sgd::default().build(&vs, 1e-2).unwrap();
    let root = vs.root();
    let var1 = root.ones("v1", &[2]);
    let var2 = root.ones("v2", &[1]);
    let mut var3 = root.ones("v3", &[2]);
    tch::no_grad(|| {
        var3 *= -1;
    });
    let all = Tensor::cat(&[&var1, &(2 * &var2), &(2 * &var3)], 0);
    let loss = all.pow(2).sum(Kind::Float);
    opt.zero_grad();
    loss.backward();
    let g1 = var1.grad();
    let g2 = var2.grad();
    let g3 = var3.grad();
    assert_eq!(Vec::<f64>::from(&g1), [2.0, 2.0]);
    assert_eq!(Vec::<f64>::from(&g2), [8.0]);
    assert_eq!(Vec::<f64>::from(&g3), [-8.0, -8.0]);
    // Test clipping the gradient by value.
    let loss = all.pow(2).sum(Kind::Float);
    opt.zero_grad();
    loss.backward();
    opt.clip_grad_value(4.0);
    assert_eq!(Vec::<f64>::from(&g1), [2.0, 2.0]);
    assert_eq!(Vec::<f64>::from(&g2), [4.0]);
    assert_eq!(Vec::<f64>::from(&g3), [-4.0, -4.0]);
    // Test clipping the gradient norm.
    let loss = all.pow(2).sum(Kind::Float);
    opt.zero_grad();
    loss.backward();
    opt.clip_grad_norm(1.0);
    assert_eq!(round4(g1), [0.1414, 0.1414]);
    assert_eq!(round4(g2), [0.5657]);
    assert_eq!(round4(g3), [-0.5657, -0.5657]);
}

#[test]
fn bn_test() {
    let opts = (tch::Kind::Float, tch::Device::Cpu);
    let vs = nn::VarStore::new(tch::Device::Cpu);
    let bn = nn::batch_norm1d(vs.root(), 40, Default::default());
    let x = Tensor::randn(&[10, 40], opts);
    let _y = x.apply_t(&bn, true);
}

#[test]
fn layer_norm_test() {
    let opts = (tch::Kind::Float, tch::Device::Cpu);
    let vs = nn::VarStore::new(tch::Device::Cpu);
    let ln = layer_norm(vs.root(), vec![5, 10, 10], Default::default());
    let x = Tensor::randn(&[20, 5, 10, 10], opts);
    let _y = x.apply(&ln);
}

#[test]
fn layer_norm_parameters_test() {
    tch::manual_seed(42);
    // Create some linear data.
    let xs = Tensor::of_slice(&[42.0, 42.0, 42.0, 24.0])
        .to_kind(Kind::Float)
        .view([-1, 2]);
    let ys = &xs * 0.42 + 1.337;

    // Fit a layer normalization layer (with deterministic initialization) on the data.
    let vs = nn::VarStore::new(Device::Cpu);
    let mut opt = nn::Sgd::default().build(&vs, 1.0).unwrap();
    let mut ln = layer_norm(vs.root(), vec![2], Default::default());

    let loss = xs.apply(&ln).mse_loss(&ys, Reduction::Mean);
    let initial_loss = f64::from(&loss);
    assert!(initial_loss > 1.0, "initial loss {}", initial_loss);

    // Optimization loop.
    for _idx in 1..50 {
        let loss = xs.apply(&ln).mse_loss(&ys, Reduction::Mean);
        opt.backward_step(&loss);
    }
    let loss = xs.apply(&ln).mse_loss(&ys, Reduction::Mean);
    let final_loss = f64::from(loss);
    assert!(final_loss < 0.25, "final loss {:?}", final_loss);

    //     Reset the weights to their initial values.
    tch::no_grad(|| {
        if let Some(ws) = &mut ln.ws {
            ws.init(nn::Init::Const(1.));
        }
        if let Some(bs) = &mut ln.bs {
            bs.init(nn::Init::Const(0.));
        }
    });
    let initial_loss2 = f64::from(xs.apply(&ln).mse_loss(&ys, Reduction::Mean));
    assert_eq!(initial_loss, initial_loss2)
}

fn gru_test(rnn_config: nn::RNNConfig) {
    use nn::RNN;
    let batch_dim = 5;
    let seq_len = 3;
    let input_dim = 2;
    let output_dim = 4;
    let vs = nn::VarStore::new(tch::Device::Cpu);
    let gru = nn::gru(&vs.root(), input_dim, output_dim, rnn_config);

    let num_directions = if rnn_config.bidirectional { 2 } else { 1 };
    let layer_dim = rnn_config.num_layers * num_directions;
    //
    // step test
    let input = Tensor::randn(&[batch_dim, input_dim], kind::FLOAT_CPU);
    let nn::GRUState(output) = gru.step(&input, &gru.zero_state(batch_dim));
    assert_eq!(output.size(), [layer_dim, batch_dim, output_dim]);

    // seq test
    let input = Tensor::randn(&[batch_dim, seq_len, input_dim], kind::FLOAT_CPU);
    let (output, _) = gru.seq(&input);
    assert_eq!(
        output.size(),
        [batch_dim, seq_len, output_dim * num_directions]
    );
}

#[test]
fn gru() {
    gru_test(Default::default());
    gru_test(nn::RNNConfig {
        has_biases: false,
        ..Default::default()
    });
    gru_test(nn::RNNConfig {
        bidirectional: true,
        ..Default::default()
    });
    gru_test(nn::RNNConfig {
        num_layers: 2,
        ..Default::default()
    });
    gru_test(nn::RNNConfig {
        num_layers: 2,
        bidirectional: true,
        ..Default::default()
    });
}

fn lstm_test(rnn_config: nn::RNNConfig) {
    use nn::RNN;
    let batch_dim = 5;
    let seq_len = 3;
    let input_dim = 2;
    let output_dim = 4;
    let vs = nn::VarStore::new(tch::Device::Cpu);
    let lstm = nn::lstm(&vs.root(), input_dim, output_dim, rnn_config);

    let num_directions = if rnn_config.bidirectional { 2 } else { 1 };
    let layer_dim = rnn_config.num_layers * num_directions;
    //
    // step test
    let input = Tensor::randn(&[batch_dim, input_dim], kind::FLOAT_CPU);
    let nn::LSTMState((h, c)) = lstm.step(&input, &lstm.zero_state(batch_dim));
    assert_eq!(h.size(), [layer_dim, batch_dim, output_dim]);
    assert_eq!(c.size(), [layer_dim, batch_dim, output_dim]);

    // seq test
    let input = Tensor::randn(&[batch_dim, seq_len, input_dim], kind::FLOAT_CPU);
    let (output, _) = lstm.seq(&input);
    assert_eq!(
        output.size(),
        [batch_dim, seq_len, output_dim * num_directions]
    );
}

#[test]
fn lstm() {
    lstm_test(Default::default());
    lstm_test(nn::RNNConfig {
        has_biases: false,
        ..Default::default()
    });
    lstm_test(nn::RNNConfig {
        bidirectional: true,
        ..Default::default()
    });
    lstm_test(nn::RNNConfig {
        num_layers: 2,
        ..Default::default()
    });
    lstm_test(nn::RNNConfig {
        num_layers: 2,
        bidirectional: true,
        ..Default::default()
    });
}

fn embedding_test(embedding_config: nn::EmbeddingConfig) {
    let batch_dim = 5;
    let seq_len = 7;
    let input_dim = 10;
    let output_dim = 4;
    let vs = nn::VarStore::new(tch::Device::Cpu);
    let embeddings = nn::embedding(&vs.root(), input_dim, output_dim, embedding_config);

    // forward test
    let input = Tensor::randint(10, &[batch_dim, seq_len], kind::INT64_CPU);
    let output = embeddings.forward(&input);
    assert_eq!(output.size(), [batch_dim, seq_len, output_dim]);

    // padding test
    let padding_idx = if embedding_config.padding_idx < 0 {
        input_dim + embedding_config.padding_idx
    } else {
        embedding_config.padding_idx
    };
    let input = Tensor::of_slice(&vec![padding_idx; 1]);
    let output = embeddings.forward(&input);
    assert_eq!(output.size(), [1, output_dim]);
    assert_eq!(output.get(0), embeddings.ws.get(padding_idx));
}

#[test]
fn embedding_default() {
    embedding_test(Default::default());
}

#[test]
fn embedding_neg_padding() {
    embedding_test(nn::EmbeddingConfig {
        padding_idx: -1,
        ..Default::default()
    });
}

#[test]
fn embedding_zero_padding() {
    embedding_test(nn::EmbeddingConfig {
        padding_idx: 0,
        ..Default::default()
    });
}

fn linear_test(linear_config: nn::LinearConfig) {
    let batch_dim = 5;
    let input_dim = 10;
    let output_dim = 4;
    let vs = nn::VarStore::new(tch::Device::Cpu);
    let linear = nn::linear(&vs.root(), input_dim, output_dim, linear_config);

    // forward test
    let input = Tensor::randint(10, &[batch_dim, input_dim], kind::FLOAT_CPU);
    let expected_var_store_size = if linear_config.bias { 2 } else { 1 };

    let output = linear.forward(&input);
    assert_eq!(output.size(), [batch_dim, output_dim]);

    assert_eq!(output.size(), [batch_dim, output_dim]);
    assert_eq!(vs.variables().len(), expected_var_store_size);
    assert!(vs.variables().contains_key("weight"));
    assert_eq!(vs.variables().contains_key("bias"), linear_config.bias);
}

#[test]
fn linear() {
    linear_test(Default::default());
    linear_test(nn::LinearConfig {
        bias: true,
        ..Default::default()
    });
    linear_test(nn::LinearConfig {
        bias: false,
        ..Default::default()
    });
}
