# Supplementary material
Source: ML conference proceedings conference paper supplement (https://proceedings.neurips.cc/paper_files/paper/2021/hash/d367eef13f90793bd8121e2f675f0dc2-Abstract.html)
Supplement: Supplementary file 1 [file d367eef13f90793bd8121e2f675f0dc2-Supplemental.zip › Scallop-Supplementary-camera-ready/code/tch-rs/third_party/pytorch/Declarations-v1.4.0.yaml]

- name: _cast_Byte
  operator_name: _cast_Byte
  overload_name: ''
  use_c10_dispatcher: full
  category_override: ''
  matches_jit_signature: true
  schema_string: aten::_cast_Byte(Tensor self, bool non_blocking=False) -> Tensor
  method_prefix_derived: ''
  arguments:
  - annotation: null
    dynamic_type: Tensor
    is_nullable: false
    name: self
    type: const Tensor &
  - annotation: null
    default: false
    dynamic_type: bool
    is_nullable: false
    name: non_blocking
    type: bool
  method_of:
  - Type
  - namespace
  mode: native
  python_module: ''
  returns:
  - dynamic_type: Tensor
    name: result
    type: Tensor
  inplace: false
  is_factory_method: null
  abstract: false
  requires_tensor: false
  device_guard: true
  with_gil: false
  deprecated: false
- name: _cast_Char
  operator_name: _cast_Char
  overload_name: ''
  use_c10_dispatcher: full
  category_override: ''
  matches_jit_signature: true
  schema_string: aten::_cast_Char(Tensor self, bool non_blocking=False) -> Tensor
  method_prefix_derived: ''
  arguments:
  - annotation: null
    dynamic_type: Tensor
    is_nullable: false
    name: self
    type: const Tensor &
  - annotation: null
    default: false
    dynamic_type: bool
    is_nullable: false
    name: non_blocking
    type: bool
  method_of:
  - Type
  - namespace
  mode: native
  python_module: ''
  returns:
  - dynamic_type: Tensor
    name: result
    type: Tensor
  inplace: false
  is_factory_method: null
  abstract: false
  requires_tensor: false
  device_guard: true
  with_gil: false
  deprecated: false
- name: _cast_Double
  operator_name: _cast_Double
  overload_name: ''
  use_c10_dispatcher: full
  category_override: ''
  matches_jit_signature: true
  schema_string: aten::_cast_Double(Tensor self, bool non_blocking=False) -> Tensor
  method_prefix_derived: ''
  arguments:
  - annotation: null
    dynamic_type: Tensor
    is_nullable: false
    name: self
    type: const Tensor &
  - annotation: null
    default: false
    dynamic_type: bool
    is_nullable: false
    name: non_blocking
    type: bool
  method_of:
  - Type
  - namespace
  mode: native
  python_module: ''
  returns:
  - dynamic_type: Tensor
    name: result
    type: Tensor
  inplace: false
  is_factory_method: null
  abstract: false
  requires_tensor: false
  device_guard: true
  with_gil: false
  deprecated: false
- name: _cast_Float
  operator_name: _cast_Float
  overload_name: ''
  use_c10_dispatcher: full
  category_override: ''
  matches_jit_signature: true
  schema_string: aten::_cast_Float(Tensor self, bool non_blocking=False) -> Tensor
  method_prefix_derived: ''
  arguments:
  - annotation: null
    dynamic_type: Tensor
    is_nullable: false
    name: self
    type: const Tensor &
  - annotation: null
    default: false
    dynamic_type: bool
    is_nullable: false
    name: non_blocking
    type: bool
  method_of:
  - Type
  - namespace
  mode: native
  python_module: ''
  returns:
  - dynamic_type: Tensor
    name: result
    type: Tensor
  inplace: false
  is_factory_method: null
  abstract: false
  requires_tensor: false
  device_guard: true
  with_gil: false
  deprecated: false
- name: _cast_Int
  operator_name: _cast_Int
  overload_name: ''
  use_c10_dispatcher: full
  category_override: ''
  matches_jit_signature: true
  schema_string: aten::_cast_Int(Tensor self, bool non_blocking=False) -> Tensor
  method_prefix_derived: ''
  arguments:
  - annotation: null
    dynamic_type: Tensor
    is_nullable: false
    name: self
    type: const Tensor &
  - annotation: null
    default: false
    dynamic_type: bool
    is_nullable: false
    name: non_blocking
    type: bool
  method_of:
  - Type
  - namespace
  mode: native
  python_module: ''
  returns:
  - dynamic_type: Tensor
    name: result
    type: Tensor
  inplace: false
  is_factory_method: null
  abstract: false
  requires_tensor: false
  device_guard: true
  with_gil: false
  deprecated: false
- name: _cast_Long
  operator_name: _cast_Long
  overload_name: ''
  use_c10_dispatcher: full
  category_override: ''
  matches_jit_signature: true
  schema_string: aten::_cast_Long(Tensor self, bool non_blocking=False) -> Tensor
  method_prefix_derived: ''
  arguments:
  - annotation: null
    dynamic_type: Tensor
    is_nullable: false
    name: self
    type: const Tensor &
  - annotation: null
    default: false
    dynamic_type: bool
    is_nullable: false
    name: non_blocking
    type: bool
  method_of:
  - Type
  - namespace
  mode: native
  python_module: ''
  returns:
  - dynamic_type: Tensor
    name: result
    type: Tensor
  inplace: false
  is_factory_method: null
  abstract: false
  requires_tensor: false
  device_guard: true
  with_gil: false
  deprecated: false
- name: _cast_Short
  operator_name: _cast_Short
  overload_name: ''
  use_c10_dispatcher: full
  category_override: ''
  matches_jit_signature: true
  schema_string: aten::_cast_Short(Tensor self, bool non_blocking=False) -> Tensor
  method_prefix_derived: ''
  arguments:
  - annotation: null
    dynamic_type: Tensor
    is_nullable: false
    name: self
    type: const Tensor &
  - annotation: null
    default: false
    dynamic_type: bool
    is_nullable: false
    name: non_blocking
    type: bool
  method_of:
  - Type
  - namespace
  mode: native
  python_module: ''
  returns:
  - dynamic_type: Tensor
    name: result
    type: Tensor
  inplace: false
  is_factory_method: null
  abstract: false
  requires_tensor: false
  device_guard: true
  with_gil: false
  deprecated: false
- name: _cast_Half
  operator_name: _cast_Half
  overload_name: ''
  use_c10_dispatcher: full
  category_override: ''
  matches_jit_signature: true
  schema_string: aten::_cast_Half(Tensor self, bool non_blocking=False) -> Tensor
  method_prefix_derived: ''
  arguments:
  - annotation: null
    dynamic_type: Tensor
    is_nullable: false
    name: self
    type: const Tensor &
  - annotation: null
    default: false
    dynamic_type: bool
    is_nullable: false
    name: non_blocking
    type: bool
  method_of:
  - Type
  - namespace
  mode: native
  python_module: ''
  returns:
  - dynamic_type: Tensor
    name: result
    type: Tensor
  inplace: false
  is_factory_method: null
  abstract: false
  requires_tensor: false
  device_guard: true
  with_gil: false
  deprecated: false
- name: backward
  operator_name: backward
  overload_name: ''
  use_c10_dispatcher: unboxed_only
  category_override: ''
  matches_jit_signature: true
  schema_string: aten::backward(Tensor self, Tensor? gradient=None, bool keep_graph=False, bool create_graph=False) -> ()
  method_prefix_derived: ''
  arguments:
  - annotation: null
    dynamic_type: Tensor
    is_nullable: false
    name: self
    type: const Tensor &
  - annotation: null
    default: '{}'
    dynamic_type: Tensor
    is_nullable: true
    name: gradient
    type: const Tensor &
  - annotation: null
    default: false
    dynamic_type: bool
    is_nullable: false
    name: keep_graph
    type: bool
  - annotation: null
    default: false
    dynamic_type: bool
    is_nullable: false
    name: create_graph
    type: bool
  method_of:
  - Type
  - Tensor
  mode: native
  python_module: ''
  returns: []
  inplace: false
  is_factory_method: null
  abstract: false
  requires_tensor: false
  device_guard: true
  with_gil: false
  deprecated: false
- name: set_data
  operator_name: set_data
  overload_name: ''
  use_c10_dispatcher: unboxed_only
  category_override: ''
  matches_jit_signature: true
  schema_string: aten::set_data(Tensor(a!) self, Tensor new_data) -> ()
  method_prefix_derived: ''
  arguments:
  - annotation: a!
    dynamic_type: Tensor
    is_nullable: false
    name: self
    type: const Tensor &
  - annotation: null
    dynamic_type: Tensor
    is_nullable: false
    name: new_data
    type: const Tensor &
  method_of:
  - Type
  - Tensor
  mode: native
  python_module: ''
  returns: []
  inplace: false
  is_factory_method: null
  abstract: false
  requires_tensor: false
  device_guard: true
  with_gil: false
  deprecated: false
- name: data
  operator_name: data
  overload_name: ''
  use_c10_dispatcher: unboxed_only
  category_override: ''
  matches_jit_signature: true
  schema_string: aten::data(Tensor self) -> Tensor
  method_prefix_derived: ''
  arguments:
  - annotation: null
    dynamic_type: Tensor
    is_nullable: false
    name: self
    type: const Tensor &
  method_of:
  - Type
  - Tensor
  mode: native
  python_module: ''
  returns:
  - dynamic_type: Tensor
    name: result
    type: Tensor
  inplace: false
  is_factory_method: null
  abstract: false
  requires_tensor: false
  device_guard: true
  with_gil: false
  deprecated: false
- name: is_leaf
  operator_name: is_leaf
  overload_name: ''
  use_c10_dispatcher: unboxed_only
  category_override: ''
  matches_jit_signature: true
  schema_string: aten::is_leaf(Tensor self) -> bool
  method_prefix_derived: ''
  arguments:
  - annotation: null
    dynamic_type: Tensor
    is_nullable: false
    name: self
    type: const Tensor &
  method_of:
  - Type
  - Tensor
  mode: native
  python_module: ''
  returns:
  - dynamic_type: bool
    name: result
    type: bool
  inplace: false
  is_factory_method: null
  abstract: false
  requires_tensor: false
  device_guard: true
  with_gil: false
  deprecated: false
- name: output_nr
  operator_name: output_nr
  overload_name: ''
  use_c10_dispatcher: unboxed_only
  category_override: ''
  matches_jit_signature: true
  schema_string: aten::output_nr(Tensor self) -> int
  method_prefix_derived: ''
  arguments:
  - annotation: null
    dynamic_type: Tensor
    is_nullable: false
    name: self
    type: const Tensor &
  method_of:
  - Type
  - Tensor
  mode: native
  python_module: ''
  returns:
  - dynamic_type: int64_t
    name: result
    type: int64_t
  inplace: false
  is_factory_method: null
  abstract: false
  requires_tensor: false
  device_guard: true
  with_gil: false
  deprecated: false
- name: _version
  operator_name: _version
  overload_name: ''
  use_c10_dispatcher: unboxed_only
  category_override: ''
  matches_jit_signature: true
  schema_string: aten::_version(Tensor self) -> int
  method_prefix_derived: ''
  arguments:
  - annotation: null
    dynamic_type: Tensor
    is_nullable: false
    name: self
    type: const Tensor &
  method_of:
  - Type
  - Tensor
  mode: native
  python_module: ''
  returns:
  - dynamic_type: int64_t
    name: result
    type: int64_t
  inplace: false
  is_factory_method: null
  abstract: false
  requires_tensor: false
  device_guard: true
  with_gil: false
  deprecated: false
- name: requires_grad_
  operator_name: requires_grad_
  overload_name: ''
  use_c10_dispatcher: unboxed_only
  category_override: ''
  matches_jit_signature: true
  schema_string: aten::requires_grad_(Tensor(a!) self, bool _requires_grad=True) -> Tensor(a!)
  method_prefix_derived: ''
  arguments:
  - annotation: a!
    dynamic_type: Tensor
    is_nullable: false
    name: self
    type: Tensor &
  - annotation: null
    default: true
    dynamic_type: bool
    is_nullable: false
    name: _requires_grad
    type: bool
  method_of:
  - Type
  - Tensor
  mode: native
  python_module: ''
  returns:
  - dynamic_type: Tensor
    name: self
    type: Tensor &
  inplace: true
  is_factory_method: null
  abstract: false
  requires_tensor: false
  device_guard: true
  with_gil: false
  deprecated: false
- name: rename_
  operator_name: rename_
  overload_name: ''
  use_c10_dispatcher: unboxed_only
  category_override: ''
  matches_jit_signature: true
  schema_string: aten::rename_(Tensor(a!) self, Dimname[]? names) -> Tensor(a!)
  method_prefix_derived: ''
  arguments:
  - annotation: a!
    dynamic_type: Tensor
    is_nullable: false
    name: self
    type: Tensor &
  - annotation: null
    dynamic_type: DimnameList
    is_nullable: true
    name: names
    type: c10::optional<DimnameList>
  method_of:
  - Type
  - Tensor
  mode: native
  python_module: ''
  returns:
  - dynamic_type: Tensor
    name: self
    type: Tensor &
  inplace: true
  is_factory_method: null
  abstract: false
  requires_tensor: false
  device_guard: true
  with_gil: false
  deprecated: false
- name: rename
  operator_name: rename
  overload_name: ''
  use_c10_dispatcher: unboxed_only
  category_override: ''
  matches_jit_signature: true
  schema_string: aten::rename(Tensor(a) self, Dimname[]? names) -> Tensor(a)
  method_prefix_derived: ''
  arguments:
  - annotation: a
    dynamic_type: Tensor
    is_nullable: false
    name: self
    type: const Tensor &
  - annotation: null
    dynamic_type: DimnameList
    is_nullable: true
    name: names
    type: c10::optional<DimnameList>
  method_of:
  - Type
  - Tensor
  mode: native
  python_module: ''
  returns:
  - dynamic_type: Tensor
    name: result
    type: Tensor
  inplace: false
  is_factory_method: null
  abstract: false
  requires_tensor: false
  device_guard: true
  with_gil: false
  deprecated: false
- name: align_to
  operator_name: align_to
  overload_name: ''
  use_c10_dispatcher: unboxed_only
  category_override: ''
  matches_jit_signature: true
  schema_string: aten::align_to(Tensor(a) self, Dimname[] names) -> Tensor(a)
  method_prefix_derived: ''
  arguments:
  - annotation: a
    dynamic_type: Tensor
    is_nullable: false
    name: self
    type: const Tensor &
  - annotation: null
    dynamic_type: DimnameList
    is_nullable: false
    name: names
    type: DimnameList
  method_of:
  - Type
  - Tensor
  mode: native
  python_module: ''
  returns:
  - dynamic_type: Tensor
    name: result
    type: Tensor
  inplace: false
  is_factory_method: null
  abstract: false
  requires_tensor: false
  device_guard: true
  with_gil: false
  deprecated: false
- name: align_to
  operator_name: align_to
  overload_name: ellipsis_idx
  use_c10_dispatcher: unboxed_only
  category_override: ''
  matches_jit_signature: true
  schema_string: aten::align_to.ellipsis_idx(Tensor(a) self, Dimname[] order, int ellipsis_idx) -> Tensor(a)
  method_prefix_derived: ''
  arguments:
  - annotation: a
    dynamic_type: Tensor
    is_nullable: false
    name: self
    type: const Tensor &
  - annotation: null
    dynamic_type: DimnameList
    is_nullable: false
    name: order
    type: DimnameList
  - annotation: null
    dynamic_type: int64_t
    is_nullable: false
    name: ellipsis_idx
    type: int64_t
  method_of:
  - Type
  - Tensor
  mode: native
  python_module: ''
  returns:
  - dynamic_type: Tensor
    name: result
    type: Tensor
  inplace: false
  is_factory_method: null
  abstract: false
  requires_tensor: false
  device_guard: true
  with_gil: false
  deprecated: false
- name: align_as
  operator_name: align_as
  overload_name: ''
  use_c10_dispatcher: unboxed_only
  category_override: ''
  matches_jit_signature: true
  schema_string: aten::align_as(Tensor self, Tensor other) -> Tensor
  method_prefix_derived: ''
  arguments:
  - annotation: null
    dynamic_type: Tensor
    is_nullable: false
    name: self
    type: const Tensor &
  - annotation: null
    dynamic_type: Tensor
    is_nullable: false
    name: other
    type: const Tensor &
  method_of:
  - Type
  - Tensor
  mode: native
  python_module: ''
  returns:
  - dynamic_type: Tensor
    name: result
    type: Tensor
  inplace: false
  is_factory_method: null
  abstract: false
  requires_tensor: false
  device_guard: true
  with_gil: false
  deprecated: false
- name: align_tensors
  operator_name: align_tensors
  overload_name: ''
  use_c10_dispatcher: unboxed_only
  category_override: ''
  matches_jit_signature: true
  schema_string: aten::align_tensors(Tensor[] tensors) -> Tensor[]
  method_prefix_derived: ''
  arguments:
  - annotation: null
    dynamic_type: TensorList
    is_nullable: false
    name: tensors
    type: TensorList
  method_of:
  - Type
  - namespace
  mode: native
  python_module: ''
  returns:
  - dynamic_type: TensorList
    name: result
    type: std::vector<Tensor>
  inplace: false
  is_factory_method: null
  abstract: false
  requires_tensor: false
  device_guard: true
  with_gil: false
  deprecated: false
- name: refine_names
  operator_name: refine_names
  overload_name: ''
  use_c10_dispatcher: unboxed_only
  category_override: ''
  matches_jit_signature: true
  schema_string: aten::refine_names(Tensor(a) self, Dimname[] names) -> Tensor(a)
  method_prefix_derived: ''
  arguments:
  - annotation: a
    dynamic_type: Tensor
    is_nullable: false
    name: self
    type: const Tensor &
  - annotation: null
    dynamic_type: DimnameList
    is_nullable: false
    name: names
    type: DimnameList
  method_of:
  - Type
  - Tensor
  mode: native
  python_module: ''
  returns:
  - dynamic_type: Tensor
    name: result
    type: Tensor
  inplace: false
  is_factory_method: null
  abstract: false
  requires_tensor: false
  device_guard: true
  with_gil: false
  deprecated: false
- name: unflatten
  operator_name: unflatten
  overload_name: Dimname
  use_c10_dispatcher: unboxed_only
  category_override: ''
  matches_jit_signature: true
  schema_string: aten::unflatten.Dimname(Tensor self, Dimname dim, int[] sizes, Dimname[] names) -> Tensor
  method_prefix_derived: ''
  arguments:
  - annotation: null
    dynamic_type: Tensor
    is_nullable: false
    name: self
    type: const Tensor &
  - annotation: null
    dynamic_type: Dimname
    is_nullable: false
    name: dim
    type: Dimname
  - annotation: null
    dynamic_type: IntArrayRef
    is_nullable: false
    name: sizes
    type: IntArrayRef
  - annotation: null
    dynamic_type: DimnameList
    is_nullable: false
    name: names
    type: DimnameList
  method_of:
  - Type
  - Tensor
  mode: native
  python_module: ''
  returns:
  - dynamic_type: Tensor
    name: result
    type: Tensor
  inplace: false
  is_factory_method: null
  abstract: false
  requires_tensor: false
  device_guard: true
  with_gil: false
  deprecated: false
- name: unflatten
  operator_name: unflatten
  overload_name: int
  use_c10_dispatcher: unboxed_only
  category_override: ''
  matches_jit_signature: true
  schema_string: aten::unflatten.int(Tensor self, int dim, int[] sizes, Dimname[] names) -> Tensor
  method_prefix_derived: ''
  arguments:
  - annotation: null
    dynamic_type: Tensor
    is_nullable: false
    name: self
    type: const Tensor &
  - annotation: null
    dynamic_type: int64_t
    is_nullable: false
    name: dim
    type: int64_t
  - annotation: null
    dynamic_type: IntArrayRef
    is_nullable: false
    name: sizes
    type: IntArrayRef
  - annotation: null
    dynamic_type: DimnameList
    is_nullable: false
    name: names
    type: DimnameList
  method_of:
  - Type
  - Tensor
  mode: native
  python_module: ''
  returns:
  - dynamic_type: Tensor
    name: result
    type: Tensor
  inplace: false
  is_factory_method: null
  abstract: false
  requires_tensor: false
  device_guard: true
  with_gil: false
  deprecated: false
- name: _use_cudnn_ctc_loss
  operator_name: _use_cudnn_ctc_loss
  overload_name: ''
  use_c10_dispatcher: unboxed_only
  category_override: ''
  matches_jit_signature: true
  schema_string: aten::_use_cudnn_ctc_loss(Tensor log_probs, Tensor targets, int[] input_lengths, int[] target_lengths, int blank) -> bool
  method_prefix_derived: ''
  arguments:
  - annotation: null
    dynamic_type: Tensor
    is_nullable: false
    name: log_probs
    type: const Tensor &
  - annotation: null
    dynamic_type: Tensor
    is_nullable: false
    name: targets
    type: const Tensor &
  - annotation: null
    dynamic_type: IntArrayRef
    is_nullable: false
    name: input_lengths
    type: IntArrayRef
  - annotation: null
    dynamic_type: IntArrayRef
    is_nullable: false
    name: target_lengths
    type: IntArrayRef
  - annotation: null
    dynamic_type: int64_t
    is_nullable: false
    name: blank
    type: int64_t
  method_of:
  - Type
  - namespace
  mode: native
  python_module: ''
  returns:
  - dynamic_type: bool
    name: result
    type: bool
  inplace: false
  is_factory_method: null
  abstract: true
  requires_tensor: false
  device_guard: true
  with_gil: false
  deprecated: false
- name: _cudnn_ctc_loss
  operator_name: _cudnn_ctc_loss
  overload_name: ''
  use_c10_dispatcher: unboxed_only
  category_override: ''
  matches_jit_signature: true
  schema_string: aten::_cudnn_ctc_loss(Tensor log_probs, Tensor targets, int[] input_lengths, int[] target_lengths, int blank, bool deterministic, bool zero_infinity) -> (Tensor, Tensor)
  method_prefix_derived: ''
  arguments:
  - annotation: null
    dynamic_type: Tensor
    is_nullable: false
    name: log_probs
    type: const Tensor &
  - annotation: null
    dynamic_type: Tensor
    is_nullable: false
    name: targets
    type: const Tensor &
  - annotation: null
    dynamic_type: IntArrayRef
    is_nullable: false
    name: input_lengths
    type: IntArrayRef
  - annotation: null
    dynamic_type: IntArrayRef
    is_nullable: false
    name: target_lengths
    type: IntArrayRef
  - annotation: null
    dynamic_type: int64_t
    is_nullable: false
    name: blank
    type: int64_t
  - annotation: null
    dynamic_type: bool
    is_nullable: false
    name: deterministic
    type: bool
  - annotation: null
    dynamic_type: bool
    is_nullable: false
    name: zero_infinity
    type: bool
  method_of:
  - Type
  - namespace
  mode: native
  python_module: ''
  returns:
  - dynamic_type: Tensor
    name: result0
    type: Tensor
  - dynamic_type: Tensor
    name: result1
    type: Tensor
  inplace: false
  is_factory_method: null
  abstract: true
  requires_tensor: false
  device_guard: true
  with_gil: false
  deprecated: false
- name: _cudnn_rnn_flatten_weight
  operator_name: _cudnn_rnn_flatten_weight
  overload_name: ''
  use_c10_dispatcher: unboxed_only
  category_override: ''
  matches_jit_signature: true
  schema_string: aten::_cudnn_rnn_flatten_weight(Tensor[] weight_arr, int weight_stride0, int input_size, int mode, int hidden_size, int num_layers, bool batch_first, bool bidirectional) -> Tensor
  method_prefix_derived: ''
  arguments:
  - annotation: null
    dynamic_type: TensorList
    is_nullable: false
    name: weight_arr
    type: TensorList
  - annotation: null
    dynamic_type: int64_t
    is_nullable: false
    name: weight_stride0
    type: int64_t
  - annotation: null
    dynamic_type: int64_t
    is_nullable: false
    name: input_size
    type: int64_t
  - annotation: null
    dynamic_type: int64_t
    is_nullable: false
    name: mode
    type: int64_t
  - annotation: null
    dynamic_type: int64_t
    is_nullable: false
    name: hidden_size
    type: int64_t
  - annotation: null
    dynamic_type: int64_t
    is_nullable: false
    name: num_layers
    type: int64_t
  - annotation: null
    dynamic_type: bool
    is_nullable: false
    name: batch_first
    type: bool
  - annotation: null
    dynamic_type: bool
    is_nullable: false
    name: bidirectional
    type: bool
  method_of:
  - Type
  - namespace
  mode: native
  python_module: ''
  returns:
  - dynamic_type: Tensor
    name: result
    type: Tensor
  inplace: false
  is_factory_method: null
  abstract: true
  requires_tensor: false
  device_guard: true
  with_gil: false
  deprecated: false
- name: _cudnn_rnn
  operator_name: _cudnn_rnn
  overload_name: ''
  use_c10_dispatcher: unboxed_only
  category_override: ''
  matches_jit_signature: true
  schema_string: aten::_cudnn_rnn(Tensor input, Tensor[] weight, int weight_stride0, Tensor? weight_buf, Tensor hx, Tensor? cx, int mode, int hidden_size, int num_layers, bool batch_first, float dropout, bool train, bool bidirectional, int[] batch_sizes, Tensor? dropout_state) -> (Tensor, Tensor, Tensor, Tensor, Tensor)
  method_prefix_derived: ''
  arguments:
  - annotation: null
    dynamic_type: Tensor
    is_nullable: false
    name: input
    type: const Tensor &
  - annotation: null
    dynamic_type: TensorList
    is_nullable: false
    name: weight
    type: TensorList
  - annotation: null
    dynamic_type: int64_t
    is_nullable: false
    name: weight_stride0
    type: int64_t
  - annotation: null
    dynamic_type: Tensor
    is_nullable: true
    name: weight_buf
    type: const Tensor &
  - annotation: null
    dynamic_type: Tensor
    is_nullable: false
    name: hx
    type: const Tensor &
  - annotation: null
    dynamic_type: Tensor
    is_nullable: true
    name: cx
    type: const Tensor &
  - annotation: null
    dynamic_type: int64_t
    is_nullable: false
    name: mode
    type: int64_t
  - annotation: null
    dynamic_type: int64_t
    is_nullable: false
    name: hidden_size
    type: int64_t
  - annotation: null
    dynamic_type: int64_t
    is_nullable: false
    name: num_layers
    type: int64_t
  - annotation: null
    dynamic_type: bool
    is_nullable: false
    name: batch_first
    type: bool
  - annotation: null
    dynamic_type: double
    is_nullable: false
    name: dropout
    type: double
  - annotation: null
    dynamic_type: bool
    is_nullable: false
    name: train
    type: bool
  - annotation: null
    dynamic_type: bool
    is_nullable: false
    name: bidirectional
    type: bool
  - annotation: null
    dynamic_type: IntArrayRef
    is_nullable: false
    name: batch_sizes
    type: IntArrayRef
  - annotation: null
    dynamic_type: Tensor
    is_nullable: true
    name: dropout_state
    type: const Tensor &
  method_of:
  - Type
  - namespace
  mode: native
  python_module: ''
  returns:
  - dynamic_type: Tensor
    name: result0
    type: Tensor
  - dynamic_type: Tensor
    name: result1
    type: Tensor
  - dynamic_type: Tensor
    name: result2
    type: Tensor
  - dynamic_type: Tensor
    name: result3
    type: Tensor
  - dynamic_type: Tensor
    name: result4
    type: Tensor
  inplace: false
  is_factory_method: null
  abstract: true
  requires_tensor: false
  device_guard: true
  with_gil: false
  deprecated: false
- name: _cudnn_rnn_backward
  operator_name: _cudnn_rnn_backward
  overload_name: ''
  use_c10_dispatcher: unboxed_only
  category_override: ''
  matches_jit_signature: true
  schema_string: aten::_cudnn_rnn_backward(Tensor input, Tensor[] weight, int weight_stride0, Tensor weight_buf, Tensor hx, Tensor? cx, Tensor output, Tensor? grad_output, Tensor? grad_hy, Tensor? grad_cy, int mode, int hidden_size, int num_layers, bool batch_first, float dropout, bool train, bool bidirectional, int[] batch_sizes, Tensor? dropout_state, Tensor reserve, bool[4] output_mask) -> (Tensor, Tensor, Tensor, Tensor[])
  method_prefix_derived: ''
  arguments:
  - annotation: null
    dynamic_type: Tensor
    is_nullable: false
    name: input
    type: const Tensor &
  - annotation: null
    dynamic_type: TensorList
    is_nullable: false
    name: weight
    type: TensorList
  - annotation: null
    dynamic_type: int64_t
    is_nullable: false
    name: weight_stride0
    type: int64_t
  - annotation: null
    dynamic_type: Tensor
    is_nullable: false
    name: weight_buf
    type: const Tensor &
  - annotation: null
    dynamic_type: Tensor
    is_nullable: false
    name: hx
    type: const Tensor &
  - annotation: null
    dynamic_type: Tensor
    is_nullable: true
    name: cx
    type: const Tensor &
  - annotation: null
    dynamic_type: Tensor
    is_nullable: false
    name: output
    type: const Tensor &
  - annotation: null
    dynamic_type: Tensor
    is_nullable: true
    name: grad_output
    type: const Tensor &
  - annotation: null
    dynamic_type: Tensor
    is_nullable: true
    name: grad_hy
    type: const Tensor &
  - annotation: null
    dynamic_type: Tensor
    is_nullable: true
    name: grad_cy
    type: const Tensor &
  - annotation: null
    dynamic_type: int64_t
    is_nullable: false
    name: mode
    type: int64_t
  - annotation: null
    dynamic_type: int64_t
    is_nullable: false
    name: hidden_size
    type: int64_t
  - annotation: null
    dynamic_type: int64_t
    is_nullable: false
    name: num_layers
    type: int64_t
  - annotation: null
    dynamic_type: bool
    is_nullable: false
    name: batch_first
    type: bool
  - annotation: null
    dynamic_type: double
    is_nullable: false
    name: dropout
    type: double
  - annotation: null
    dynamic_type: bool
    is_nullable: false
    name: train
    type: bool
  - annotation: null
    dynamic_type: bool
    is_nullable: false
    name: bidirectional
    type: bool
  - annotation: null
    dynamic_type: IntArrayRef
    is_nullable: false
    name: batch_sizes
    type: IntArrayRef
  - annotation: null
    dynamic_type: Tensor
    is_nullable: true
    name: dropout_state
    type: const Tensor &
  - annotation: null
    dynamic_type: Tensor
    is_nullable: false
    name: reserve
    type: const Tensor &
  - annotation: null
    dynamic_type: std::array<bool,4>
    is_nullable: false
    name: output_mask
    type: std::array<bool,4>
  method_of:
  - Type
  - namespace
  mode: native
  python_module: ''
  returns:
  - dynamic_type: Tensor
    name: result0
    type: Tensor
  - dynamic_type: Tensor
    name: result1
    type: Tensor
  - dynamic_type: Tensor
    name: result2
    type: Tensor
  - dynamic_type: TensorList
    name: result3
    type: std::vector<Tensor>
  inplace: false
  is_factory_method: null
  abstract: true
  requires_tensor: false
  device_guard: true
  with_gil: false
  deprecated: false
- name: _cudnn_init_dropout_state
  operator_name: _cudnn_init_dropout_state
  overload_name: ''
  use_c10_dispatcher: unboxed_only
  category_override: ''
  matches_jit_signature: true
  schema_string: aten::_cudnn_init_dropout_state(float dropout, bool train, int dropout_seed, *, ScalarType dtype, Layout layout, Device device, bool pin_memory=False) -> Tensor
  method_prefix_derived: ''
  arguments:
  - annotation: null
    dynamic_type: double
    is_nullable: false
    name: dropout
    type: double
  - annotation: null
    dynamic_type: bool
    is_nullable: false
    name: train
    type: bool
  - annotation: null
    dynamic_type: int64_t
    is_nullable: false
    name: dropout_seed
    type: int64_t
  - annotation: null
    dynamic_type: TensorOptions
    is_nullable: false
    kwarg_only: true
    name: options
    type: const TensorOptions &
  method_of:
  - Type
  - namespace
  mode: native
  python_module: ''
  returns:
  - dynamic_type: Tensor
    name: result
    type: Tensor
  inplace: false
  is_factory_method: true
  abstract: true
  requires_tensor: false
  device_guard: true
  with_gil: false
  deprecated: false
- name: _debug_has_internal_overlap
  operator_name: _debug_has_internal_overlap
  overload_name: ''
  use_c10_dispatcher: full
  category_override: ''
  matches_jit_signature: true
  schema_string: aten::_debug_has_internal_overlap(Tensor self) -> int
  method_prefix_derived: ''
  arguments:
  - annotation: null
    dynamic_type: Tensor
    is_nullable: false
    name: self
    type: const Tensor &
  method_of:
  - Type
  - namespace
  mode: native
  python_module: ''
  returns:
  - dynamic_type: int64_t
    name: result
    type: int64_t
  inplace: false
  is_factory_method: null
  abstract: false
  requires_tensor: false
  device_guard: true
  with_gil: false
  deprecated: false
- name: _fused_dropout
  operator_name: _fused_dropout
  overload_name: ''
  use_c10_dispatcher: unboxed_only
  category_override: ''
  matches_jit_signature: true
  schema_string: aten::_fused_dropout(Tensor self, float p, Generator? generator=None) -> (Tensor, Tensor)
  method_prefix_derived: ''
  arguments:
  - annotation: null
    dynamic_type: Tensor
    is_nullable: false
    name: self
    type: const Tensor &
  - annotation: null
    dynamic_type: double
    is_nullable: false
    name: p
    type: double
  - annotation: null
    default: nullptr
    dynamic_type: Generator *
    is_nullable: false
    name: generator
    type: Generator *
  method_of:
  - Type
  - namespace
  mode: native
  python_module: ''
  returns:
  - dynamic_type: Tensor
    name: result0
    type: Tensor
  - dynamic_type: Tensor
    name: result1
    type: Tensor
  inplace: false
  is_factory_method: null
  abstract: true
  requires_tensor: false
  device_guard: true
  with_gil: false
  deprecated: false
- name: _masked_scale
  operator_name: _masked_scale
  overload_name: ''
  use_c10_dispatcher: full
  category_override: ''
  matches_jit_signature: true
  schema_string: aten::_masked_scale(Tensor self, Tensor mask, float scale) -> Tensor
  method_prefix_derived: ''
  arguments:
  - annotation: null
    dynamic_type: Tensor
    is_nullable: false
    name: self
    type: const Tensor &
  - annotation: null
    dynamic_type: Tensor
    is_nullable: false
    name: mask
    type: const Tensor &
  - annotation: null
    dynamic_type: double
    is_nullable: false
    name: scale
    type: double
  method_of:
  - Type
  - namespace
  mode: native
  python_module: ''
  returns:
  - dynamic_type: Tensor
    name: result
    type: Tensor
  inplace: false
  is_factory_method: null
  abstract: true
  requires_tensor: false
  device_guard: true
  with_gil: false
  deprecated: false
- name: _sobol_engine_draw
  operator_name: _sobol_engine_draw
  overload_name: ''
  use_c10_dispatcher: unboxed_only
  category_override: ''
  matches_jit_signature: true
  schema_string: aten::_sobol_engine_draw(Tensor quasi, int n, Tensor sobolstate, int dimension, int num_generated, ScalarType? dtype) -> (Tensor, Tensor)
  method_prefix_derived: ''
  arguments:
  - annotation: null
    dynamic_type: Tensor
    is_nullable: false
    name: quasi
    type: const Tensor &
  - annotation: null
    dynamic_type: int64_t
    is_nullable: false
    name: n
    type: int64_t
  - annotation: null
    dynamic_type: Tensor
    is_nullable: false
    name: sobolstate
    type: const Tensor &
  - annotation: null
    dynamic_type: int64_t
    is_nullable: false
    name: dimension
    type: int64_t
  - annotation: null
    dynamic_type: int64_t
    is_nullable: false
    name: num_generated
    type: int64_t
  - annotation: null
    dynamic_type: ScalarType
    is_nullable: true
    name: dtype
    type: c10::optional<ScalarType>
  method_of:
  - Type
  - namespace
  mode: native
  python_module: ''
  returns:
  - dynamic_type: Tensor
    name: result0
    type: Tensor
  - dynamic_type: Tensor
    name: result1
    type: Tensor
  inplace: false
  is_factory_method: null
  abstract: false
  requires_tensor: false
  device_guard: true
  with_gil: false
  deprecated: false
- name: _sobol_engine_ff_
  operator_name: _sobol_engine_ff_
  overload_name: ''
  use_c10_dispatcher: unboxed_only
  category_override: ''
  matches_jit_signature: true
  schema_string: aten::_sobol_engine_ff_(Tensor(a!) self, int n, Tensor sobolstate, int dimension, int num_generated) -> Tensor(a!)
  method_prefix_derived: ''
  arguments:
  - annotation: a!
    dynamic_type: Tensor
    is_nullable: false
    name: self
    type: Tensor &
  - annotation: null
    dynamic_type: int64_t
    is_nullable: false
    name: n
    type: int64_t
  - annotation: null
    dynamic_type: Tensor
    is_nullable: false
    name: sobolstate
    type: const Tensor &
  - annotation: null
    dynamic_type: int64_t
    is_nullable: false
    name: dimension
    type: int64_t
  - annotation: null
    dynamic_type: int64_t
    is_nullable: false
    name: num_generated
    type: int64_t
  method_of:
  - Type
  - namespace
  mode: native
  python_module: ''
  returns:
  - dynamic_type: Tensor
    name: self
    type: Tensor &
  inplace: true
  is_factory_method: null
  abstract: false
  requires_tensor: false
  device_guard: true
  with_gil: false
  deprecated: false
- name: _sobol_engine_scramble_
  operator_name: _sobol_engine_scramble_
  overload_name: ''
  use_c10_dispatcher: unboxed_only
  category_override: ''
  matches_jit_signature: true
  schema_string: aten::_sobol_engine_scramble_(Tensor(a!) self, Tensor ltm, int dimension) -> Tensor(a!)
  method_prefix_derived: ''
  arguments:
  - annotation: a!
    dynamic_type: Tensor
    is_nullable: false
    name: self
    type: Tensor &
  - annotation: null
    dynamic_type: Tensor
    is_nullable: false
    name: ltm
    type: const Tensor &
  - annotation: null
    dynamic_type: int64_t
    is_nullable: false
    name: dimension
    type: int64_t
  method_of:
  - Type
  - namespace
  mode: native
  python_module: ''
  returns:
  - dynamic_type: Tensor
    name: self
    type: Tensor &
  inplace: true
  is_factory_method: null
  abstract: false
  requires_tensor: false
  device_guard: true
  with_gil: false
  deprecated: false
- name: _sobol_engine_initialize_state_
  operator_name: _sobol_engine_initialize_state_
  overload_name: ''
  use_c10_dispatcher: unboxed_only
  category_override: ''
  matches_jit_signature: true
  schema_string: aten::_sobol_engine_initialize_state_(Tensor(a!) self, int dimension) -> Tensor(a!)
  method_prefix_derived: ''
  arguments:
  - annotation: a!
    dynamic_type: Tensor
    is_nullable: false
    name: self
    type: Tensor &
  - annotation: null
    dynamic_type: int64_t
    is_nullable: false
    name: dimension
    type: int64_t
  method_of:
  - Type
  - namespace
  mode: native
  python_module: ''
  returns:
  - dynamic_type: Tensor
    name: self
    type: Tensor &
  inplace: true
  is_factory_method: null
  abstract: false
  requires_tensor: false
  device_guard: true
  with_gil: false
  deprecated: false
- name: _reshape_from_tensor
  operator_name: _reshape_from_tensor
  overload_name: ''
  use_c10_dispatcher: full
  category_override: ''
  matches_jit_signature: true
  schema_string: aten::_reshape_from_tensor(Tensor self, Tensor shape) -> Tensor
  method_prefix_derived: ''
  arguments:
  - annotation: null
    dynamic_type: Tensor
    is_nullable: false
    name: self
    type: const Tensor &
  - annotation: null
    dynamic_type: Tensor
    is_nullable: false
    name: shape
    type: const Tensor &
  method_of:
  - Type
  - namespace
  mode: native
  python_module: ''
  returns:
  - dynamic_type: Tensor
    name: result
    type: Tensor
  inplace: false
  is_factory_method: null
  abstract: false
  requires_tensor: false
  device_guard: true
  with_gil: false
  deprecated: false
- name: _shape_as_tensor
  operator_name: _shape_as_tensor
  overload_name: ''
  use_c10_dispatcher: full
  category_override: ''
  matches_jit_signature: true
  schema_string: aten::_shape_as_tensor(Tensor self) -> Tensor
  method_prefix_derived: ''
  arguments:
  - annotation: null
    dynamic_type: Tensor
    is_nullable: false
    name: self
    type: const Tensor &
  method_of:
  - Type
  - namespace
  mode: native
  python_module: ''
  returns:
  - dynamic_type: Tensor
    name: result
    type: Tensor
  inplace: false
  is_factory_method: null
  abstract: false
  requires_tensor: false
  device_guard: true
  with_gil: false
  deprecated: false
- name: dropout
  operator_name: dropout
  overload_name: ''
  use_c10_dispatcher: full
  category_override: ''
  matches_jit_signature: true
  schema_string: aten::dropout(Tensor input, float p, bool train) -> Tensor
  method_prefix_derived: ''
  arguments:
  - annotation: null
    dynamic_type: Tensor
    is_nullable: false
    name: input
    type: const Tensor &
  - annotation: null
    dynamic_type: double
    is_nullable: false
    name: p
    type: double
  - annotation: null
    dynamic_type: bool
    is_nullable: false
    name: train
    type: bool
  method_of:
  - Type
  - namespace
  mode: native
  python_module: ''
  returns:
  - dynamic_type: Tensor
    name: result
    type: Tensor
  inplace: false
  is_factory_method: null
  abstract: false
  requires_tensor: false
  device_guard: true
  with_gil: false
  deprecated: false
- name: dropout_
  operator_name: dropout_
  overload_name: ''
  use_c10_dispatcher: unboxed_only
  category_override: ''
  matches_jit_signature: true
  schema_string: aten::dropout_(Tensor(a!) self, float p, bool train) -> Tensor(a!)
  method_prefix_derived: ''
  arguments:
  - annotation: a!
    dynamic_type: Tensor
    is_nullable: false
    name: self
    type: Tensor &
  - annotation: null
    dynamic_type: double
    is_nullable: false
    name: p
    type: double
  - annotation: null
    dynamic_type: bool
    is_nullable: false
    name: train
    type: bool
  method_of:
  - Type
  - namespace
  mode: native
  python_module: ''
  returns:
  - dynamic_type: Tensor
    name: self
    type: Tensor &
  inplace: true
  is_factory_method: null
  abstract: false
  requires_tensor: false
  device_guard: true
  with_gil: false
  deprecated: false
- name: feature_dropout
  operator_name: feature_dropout
  overload_name: ''
  use_c10_dispatcher: full
  category_override: ''
  matches_jit_signature: true
  schema_string: aten::feature_dropout(Tensor input, float p, bool train) -> Tensor
  method_prefix_derived: ''
  arguments:
  - annotation: null
    dynamic_type: Tensor
    is_nullable: false
    name: input
    type: const Tensor &
  - annotation: null
    dynamic_type: double
    is_nullable: false
    name: p
    type: double
  - annotation: null
    dynamic_type: bool
    is_nullable: false
    name: train
    type: bool
  method_of:
  - Type
  - namespace
  mode: native
  python_module: ''
  returns:
  - dynamic_type: Tensor
    name: result
    type: Tensor
  inplace: false
  is_factory_method: null
  abstract: false
  requires_tensor: false
  device_guard: true
  with_gil: false
  deprecated: false
- name: feature_dropout_
  operator_name: feature_dropout_
  overload_name: ''
  use_c10_dispatcher: unboxed_only
  category_override: ''
  matches_jit_signature: true
  schema_string: aten::feature_dropout_(Tensor(a!) self, float p, bool train) -> Tensor(a!)
  method_prefix_derived: ''
  arguments:
  - annotation: a!
    dynamic_type: Tensor
    is_nullable: false
    name: self
    type: Tensor &
  - annotation: null
    dynamic_type: double
    is_nullable: false
    name: p
    type: double
  - annotation: null
    dynamic_type: bool
    is_nullable: false
    name: train
    type: bool
  method_of:
  - Type
  - namespace
  mode: native
  python_module: ''
  returns:
  - dynamic_type: Tensor
    name: self
    type: Tensor &
  inplace: true
  is_factory_method: null
  abstract: false
  requires_tensor: false
  device_guard: true
  with_gil: false
  deprecated: false
- name: alpha_dropout
  operator_name: alpha_dropout
  overload_name: ''
  use_c10_dispatcher: full
  category_override: ''
  matches_jit_signature: true
  schema_string: aten::alpha_dropout(Tensor input, float p, bool train) -> Tensor
  method_prefix_derived: ''
  arguments:
  - annotation: null
    dynamic_type: Tensor
    is_nullable: false
    name: input
    type: const Tensor &
  - annotation: null
    dynamic_type: double
    is_nullable: false
    name: p
    type: double
  - annotation: null
    dynamic_type: bool
    is_nullable: false
    name: train
    type: bool
  method_of:
  - Type
  - namespace
  mode: native
  python_module: ''
  returns:
  - dynamic_type: Tensor
    name: result
    type: Tensor
  inplace: false
  is_factory_method: null
  abstract: false
  requires_tensor: false
  device_guard: true
  with_gil: false
  deprecated: false
- name: alpha_dropout_
  operator_name: alpha_dropout_
  overload_name: ''
  use_c10_dispatcher: unboxed_only
  category_override: ''
  matches_jit_signature: true
  schema_string: aten::alpha_dropout_(Tensor(a!) self, float p, bool train) -> Tensor(a!)
  method_prefix_derived: ''
  arguments:
  - annotation: a!
    dynamic_type: Tensor
    is_nullable: false
    name: self
    type: Tensor &
  - annotation: null
    dynamic_type: double
    is_nullable: false
    name: p
    type: double
  - annotation: null
    dynamic_type: bool
    is_nullable: false
    name: train
    type: bool
  method_of:
  - Type
  - namespace
  mode: native
  python_module: ''
  returns:
  - dynamic_type: Tensor
    name: self
    type: Tensor &
  inplace: true
  is_factory_method: null
  abstract: false
  requires_tensor: false
  device_guard: true
  with_gil: false
  deprecated: false
- name: feature_alpha_dropout
  operator_name: feature_alpha_dropout
  overload_name: ''
  use_c10_dispatcher: full
  category_override: ''
  matches_jit_signature: true
  schema_string: aten::feature_alpha_dropout(Tensor input, float p, bool train) -> Tensor
  method_prefix_derived: ''
  arguments:
  - annotation: null
    dynamic_type: Tensor
    is_nullable: false
    name: input
    type: const Tensor &
  - annotation: null
    dynamic_type: double
    is_nullable: false
    name: p
    type: double
  - annotation: null
    dynamic_type: bool
    is_nullable: false
    name: train
    type: bool
  method_of:
  - Type
  - namespace
  mode: native
  python_module: ''
  returns:
  - dynamic_type: Tensor
    name: result
    type: Tensor
  inplace: false
  is_factory_method: null
  abstract: false
  requires_tensor: false
  device_guard: true
  with_gil: false
  deprecated: false
- name: feature_alpha_dropout_
  operator_name: feature_alpha_dropout_
  overload_name: ''
  use_c10_dispatcher: unboxed_only
  category_override: ''
  matches_jit_signature: true
  schema_string: aten::feature_alpha_dropout_(Tensor(a!) self, float p, bool train) -> Tensor(a!)
  method_prefix_derived: ''
  arguments:
  - annotation: a!
    dynamic_type: Tensor
    is_nullable: false
    name: self
    type: Tensor &
  - annotation: null
    dynamic_type: double
    is_nullable: false
    name: p
    type: double
  - annotation: null
    dynamic_type: bool
    is_nullable: false
    name: train
    type: bool
  method_of:
  - Type
  - namespace
  mode: native
  python_module: ''
  returns:
  - dynamic_type: Tensor
    name: self
    type: Tensor &
  inplace: true
  is_factory_method: null
  abstract: false
  requires_tensor: false
  device_guard: true
  with_gil: false
  deprecated: false
- name: abs
  operator_name: abs
  overload_name: ''
  use_c10_dispatcher: full
  category_override: ''
  matches_jit_signature: true
  schema_string: aten::abs(Tensor self) -> Tensor
  method_prefix_derived: ''
  arguments:
  - annotation: null
    dynamic_type: Tensor
    is_nullable: false
    name: self
    type: const Tensor &
  method_of:
  - Type
  - Tensor
  - namespace
  mode: native
  python_module: ''
  returns:
  - dynamic_type: Tensor
    name: result
    type: Tensor
  inplace: false
  is_factory_method: null
  abstract: false
  requires_tensor: false
  device_guard: true
  with_gil: false
  deprecated: false
- name: abs_
  operator_name: abs_
  overload_name: ''
  use_c10_dispatcher: unboxed_only
  category_override: ''
  matches_jit_signature: true
  schema_string: aten::abs_(Tensor(a!) self) -> Tensor(a!)
  method_prefix_derived: ''
  arguments:
  - annotation: a!
    dynamic_type: Tensor
    is_nullable: false
    name: self
    type: Tensor &
  method_of:
  - Type
  - Tensor
  - namespace
  mode: native
  python_module: ''
  returns:
  - dynamic_type: Tensor
    name: self
    type: Tensor &
  inplace: true
  is_factory_method: null
  abstract: false
  requires_tensor: false
  device_guard: true
  with_gil: false
  deprecated: false
- name: abs_out
  operator_name: abs
  overload_name: out
  use_c10_dispatcher: unboxed_only
  category_override: ''
  matches_jit_signature: true
  schema_string: aten::abs.out(Tensor self, *, Tensor(a!) out) -> Tensor(a!)
  method_prefix_derived: ''
  arguments:
  - allocate: true
    annotation: a!
    dynamic_type: Tensor
    is_nullable: false
    kwarg_only: false
    name: out
    output: true
    type: Tensor &
  - annotation: null
    dynamic_type: Tensor
    is_nullable: false
    name: self
    type: const Tensor &
  method_of:
  - Type
  - namespace
  mode: native
  python_module: ''
  returns:
  - dynamic_type: Tensor
    name: out
    type: Tensor &
  inplace: false
  is_factory_method: null
  abstract: false
  requires_tensor: false
  device_guard: true
  with_gil: false
  deprecated: false
- name: angle
  operator_name: angle
  overload_name: ''
  use_c10_dispatcher: unboxed_only
  category_override: ''
  matches_jit_signature: true
  schema_string: aten::angle(Tensor self) -> Tensor
  method_prefix_derived: ''
  arguments:
  - annotation: null
    dynamic_type: Tensor
    is_nullable: false
    name: self
    type: const Tensor &
  method_of:
  - Type
  - Tensor
  - namespace
  mode: native
  python_module: ''
  returns:
  - dynamic_type: Tensor
    name: result
    type: Tensor
  inplace: false
  is_factory_method: null
  abstract: false
  requires_tensor: false
  device_guard: true
  with_gil: false
  deprecated: false
- name: angle_out
  operator_name: angle
  overload_name: out
  use_c10_dispatcher: unboxed_only
  category_override: ''
  matches_jit_signature: true
  schema_string: aten::angle.out(Tensor self, *, Tensor(a!) out) -> Tensor(a!)
  method_prefix_derived: ''
  arguments:
  - allocate: true
    annotation: a!
    dynamic_type: Tensor
    is_nullable: false
    kwarg_only: false
    name: out
    output: true
    type: Tensor &
  - annotation: null
    dynamic_type: Tensor
    is_nullable: false
    name: self
    type: const Tensor &
  method_of:
  - Type
  - namespace
  mode: native
  python_module: ''
  returns:
  - dynamic_type: Tensor
    name: out
    type: Tensor &
  inplace: false
  is_factory_method: null
  abstract: true
  requires_tensor: false
  device_guard: true
  with_gil: false
  deprecated: false
- name: real
  operator_name: real
  overload_name: ''
  use_c10_dispatcher: unboxed_only
  category_override: ''
  matches_jit_signature: true
  schema_string: aten::real(Tensor self) -> Tensor
  method_prefix_derived: ''
  arguments:
  - annotation: null
    dynamic_type: Tensor
    is_nullable: false
    name: self
    type: const Tensor &
  method_of:
  - Type
  - Tensor
  - namespace
  mode: native
  python_module: ''
  returns:
  - dynamic_type: Tensor
    name: result
    type: Tensor
  inplace: false
  is_factory_method: null
  abstract: false
  requires_tensor: false
  device_guard: true
  with_gil: false
  deprecated: false
- name: real_out
  operator_name: real
  overload_name: out
  use_c10_dispatcher: unboxed_only
  category_override: ''
  matches_jit_signature: true
  schema_string: aten::real.out(Tensor self, *, Tensor(a!) out) -> Tensor(a!)
  method_prefix_derived: ''
  arguments:
  - allocate: true
    annotation: a!
    dynamic_type: Tensor
    is_nullable: false
    kwarg_only: false
    name: out
    output: true
    type: Tensor &
  - annotation: null
    dynamic_type: Tensor
    is_nullable: false
    name: self
    type: const Tensor &
  method_of:
  - Type
  - namespace
  mode: native
  python_module: ''
  returns:
  - dynamic_type: Tensor
    name: out
    type: Tensor &
  inplace: false
  is_factory_method: null
  abstract: true
  requires_tensor: false
  device_guard: true
  with_gil: false
  deprecated: false
- name: imag
  operator_name: imag
  overload_name: ''
  use_c10_dispatcher: unboxed_only
  category_override: ''
  matches_jit_signature: true
  schema_string: aten::imag(Tensor self) -> Tensor
  method_prefix_derived: ''
  arguments:
  - annotation: null
    dynamic_type: Tensor
    is_nullable: false
    name: self
    type: const Tensor &
  method_of:
  - Type
  - Tensor
  - namespace
  mode: native
  python_module: ''
  returns:
  - dynamic_type: Tensor
    name: result
    type: Tensor
  inplace: false
  is_factory_method: null
  abstract: false
  requires_tensor: false
  device_guard: true
  with_gil: false
  deprecated: false
- name: imag_out
  operator_name: imag
  overload_name: out
  use_c10_dispatcher: unboxed_only
  category_override: ''
  matches_jit_signature: true
  schema_string: aten::imag.out(Tensor self, *, Tensor(a!) out) -> Tensor(a!)
  method_prefix_derived: ''
  arguments:
  - allocate: true
    annotation: a!
    dynamic_type: Tensor
    is_nullable: false
    kwarg_only: false
    name: out
    output: true
    type: Tensor &
  - annotation: null
    dynamic_type: Tensor
    is_nullable: false
    name: self
    type: const Tensor &
  method_of:
  - Type
  - namespace
  mode: native
  python_module: ''
  returns:
  - dynamic_type: Tensor
    name: out
    type: Tensor &
  inplace: false
  is_factory_method: null
  abstract: true
  requires_tensor: false
  device_guard: true
  with_gil: false
  deprecated: false
- name: conj
  operator_name: conj
  overload_name: ''
  use_c10_dispatcher: unboxed_only
  category_override: ''
  matches_jit_signature: true
  schema_string: aten::conj(Tensor self) -> Tensor
  method_prefix_derived: ''
  arguments:
  - annotation: null
    dynamic_type: Tensor
    is_nullable: false
    name: self
    type: const Tensor &
  method_of:
  - Type
  - Tensor
  - namespace
  mode: native
  python_module: ''
  returns:
  - dynamic_type: Tensor
    name: result
    type: Tensor
  inplace: false
  is_factory_method: null
  abstract: false
  requires_tensor: false
  device_guard: true
  with_gil: false
  deprecated: false
- name: conj_out
  operator_name: conj
  overload_name: out
  use_c10_dispatcher: unboxed_only
  category_override: ''
  matches_jit_signature: true
  schema_string: aten::conj.out(Tensor self, *, Tensor(a!) out) -> Tensor(a!)
  method_prefix_derived: ''
  arguments:
  - allocate: true
    annotation: a!
    dynamic_type: Tensor
    is_nullable: false
    kwarg_only: false
    name: out
    output: true
    type: Tensor &
  - annotation: null
    dynamic_type: Tensor
    is_nullable: false
    name: self
    type: const Tensor &
  method_of:
  - Type
  - namespace
  mode: native
  python_module: ''
  returns:
  - dynamic_type: Tensor
    name: out
    type: Tensor &
  inplace: false
  is_factory_method: null
  abstract: true
  requires_tensor: false
  device_guard: true
  with_gil: false
  deprecated: false
- name: acos
  operator_name: acos
  overload_name: ''
  use_c10_dispatcher: full
  category_override: ''
  matches_jit_signature: true
  schema_string: aten::acos(Tensor self) -> Tensor
  method_prefix_derived: ''
  arguments:
  - annotation: null
    dynamic_type: Tensor
    is_nullable: false
    name: self
    type: const Tensor &
  method_of:
  - Type
  - Tensor
  - namespace
  mode: native
  python_module: ''
  returns:
  - dynamic_type: Tensor
    name: result
    type: Tensor
  inplace: false
  is_factory_method: null
  abstract: false
  requires_tensor: false
  device_guard: true
  with_gil: false
  deprecated: false
- name: acos_
  operator_name: acos_
  overload_name: ''
  use_c10_dispatcher: unboxed_only
  category_override: ''
  matches_jit_signature: true
  schema_string: aten::acos_(Tensor(a!) self) -> Tensor(a!)
  method_prefix_derived: ''
  arguments:
  - annotation: a!
    dynamic_type: Tensor
    is_nullable: false
    name: self
    type: Tensor &
  method_of:
  - Type
  - Tensor
  - namespace
  mode: native
  python_module: ''
  returns:
  - dynamic_type: Tensor
    name: self
    type: Tensor &
  inplace: true
  is_factory_method: null
  abstract: false
  requires_tensor: false
  device_guard: true
  with_gil: false
  deprecated: false
- name: acos_out
  operator_name: acos
  overload_name: out
  use_c10_dispatcher: unboxed_only
  category_override: ''
  matches_jit_signature: true
  schema_string: aten::acos.out(Tensor self, *, Tensor(a!) out) -> Tensor(a!)
  method_prefix_derived: ''
  arguments:
  - allocate: true
    annotation: a!
    dynamic_type: Tensor
    is_nullable: false
    kwarg_only: false
    name: out
    output: true
    type: Tensor &
  - annotation: null
    dynamic_type: Tensor
    is_nullable: false
    name: self
    type: const Tensor &
  method_of:
  - Type
  - namespace
  mode: native
  python_module: ''
  returns:
  - dynamic_type: Tensor
    name: out
    type: Tensor &
  inplace: false
  is_factory_method: null
  abstract: false
  requires_tensor: false
  device_guard: true
  with_gil: false
  deprecated: false
- name: avg_pool1d
  operator_name: avg_pool1d
  overload_name: ''
  use_c10_dispatcher: unboxed_only
  category_override: ''
  matches_jit_signature: true
  schema_string: aten::avg_pool1d(Tensor self, int[1] kernel_size, int[1] stride=[], int[1] padding=0, bool ceil_mode=False, bool count_include_pad=True) -> Tensor
  method_prefix_derived: ''
  arguments:
  - annotation: null
    dynamic_type: Tensor
    is_nullable: false
    name: self
    type: const Tensor &
  - annotation: null
    dynamic_type: IntArrayRef
    is_nullable: false
    name: kernel_size
    size: 1
    type: IntArrayRef
  - annotation: null
    default: '{}'
    dynamic_type: IntArrayRef
    is_nullable: false
    name: stride
    size: 1
    type: IntArrayRef
  - annotation: null
    default: 0
    dynamic_type: IntArrayRef
    is_nullable: false
    name: padding
    size: 1
    type: IntArrayRef
  - annotation: null
    default: false
    dynamic_type: bool
    is_nullable: false
    name: ceil_mode
    type: bool
  - annotation: null
    default: true
    dynamic_type: bool
    is_nullable: false
    name: count_include_pad
    type: bool
  method_of:
  - Type
  - namespace
  mode: native
  python_module: ''
  returns:
  - dynamic_type: Tensor
    name: result
    type: Tensor
  inplace: false
  is_factory_method: null
  abstract: false
  requires_tensor: false
  device_guard: true
  with_gil: false
  deprecated: false
- name: adaptive_avg_pool1d
  operator_name: adaptive_avg_pool1d
  overload_name: ''
  use_c10_dispatcher: unboxed_only
  category_override: ''
  matches_jit_signature: true
  schema_string: aten::adaptive_avg_pool1d(Tensor self, int[1] output_size) -> Tensor
  method_prefix_derived: ''
  arguments:
  - annotation: null
    dynamic_type: Tensor
    is_nullable: false
    name: self
    type: const Tensor &
  - annotation: null
    dynamic_type: IntArrayRef
    is_nullable: false
    name: output_size
    size: 1
    type: IntArrayRef
  method_of:
  - Type
  - namespace
  mode: native
  python_module: ''
  returns:
  - dynamic_type: Tensor
    name: result
    type: Tensor
  inplace: false
  is_factory_method: null
  abstract: false
  requires_tensor: false
  device_guard: true
  with_gil: false
  deprecated: false
- name: adaptive_max_pool1d
  operator_name: adaptive_max_pool1d
  overload_name: ''
  use_c10_dispatcher: unboxed_only
  category_override: ''
  matches_jit_signature: true
  schema_string: aten::adaptive_max_pool1d(Tensor self, int[1] output_size) -> (Tensor, Tensor)
  method_prefix_derived: ''
  arguments:
  - annotation: null
    dynamic_type: Tensor
    is_nullable: false
    name: self
    type: const Tensor &
  - annotation: null
    dynamic_type: IntArrayRef
    is_nullable: false
    name: output_size
    size: 1
    type: IntArrayRef
  method_of:
  - Type
  - namespace
  mode: native
  python_module: ''
  returns:
  - dynamic_type: Tensor
    name: result0
    type: Tensor
  - dynamic_type: Tensor
    name: result1
    type: Tensor
  inplace: false
  is_factory_method: null
  abstract: false
  requires_tensor: false
  device_guard: true
  with_gil: false
  deprecated: false
- name: add
  operator_name: add
  overload_name: Tensor
  use_c10_dispatcher: full
  category_override: ''
  matches_jit_signature: true
  schema_string: aten::add.Tensor(Tensor self, Tensor other, *, Scalar alpha=1) -> Tensor
  method_prefix_derived: ''
  arguments:
  - annotation: null
    dynamic_type: Tensor
    is_nullable: false
    name: self
    type: const Tensor &
  - annotation: null
    dynamic_type: Tensor
    is_nullable: false
    name: other
    type: const Tensor &
  - annotation: null
    default: 1
    dynamic_type: Scalar
    is_nullable: false
    kwarg_only: true
    name: alpha
    type: Scalar
  method_of:
  - Type
  - Tensor
  - namespace
  mode: native
  python_module: ''
  returns:
  - dynamic_type: Tensor
    name: result
    type: Tensor
  inplace: false
  is_factory_method: null
  abstract: true
  requires_tensor: false
  device_guard: true
  with_gil: false
  deprecated: false
- name: add_
  operator_name: add_
  overload_name: Tensor
  use_c10_dispatcher: unboxed_only
  category_override: ''
  matches_jit_signature: true
  schema_string: aten::add_.Tensor(Tensor(a!) self, Tensor other, *, Scalar alpha=1) -> Tensor(a!)
  method_prefix_derived: ''
  arguments:
  - annotation: a!
    dynamic_type: Tensor
    is_nullable: false
    name: self
    type: Tensor &
  - annotation: null
    dynamic_type: Tensor
    is_nullable: false
    name: other
    type: const Tensor &
  - annotation: null
    default: 1
    dynamic_type: Scalar
    is_nullable: false
    kwarg_only: true
    name: alpha
    type: Scalar
  method_of:
  - Type
  - Tensor
  mode: native
  python_module: ''
  returns:
  - dynamic_type: Tensor
    name: self
    type: Tensor &
  inplace: true
  is_factory_method: null
  abstract: true
  requires_tensor: false
  device_guard: true
  with_gil: false
  deprecated: false
- name: add_out
  operator_name: add
  overload_name: out
  use_c10_dispatcher: unboxed_only
  category_override: ''
  matches_jit_signature: true
  schema_string: aten::add.out(Tensor self, Tensor other, *, Scalar alpha=1, Tensor(a!) out) -> Tensor(a!)
  method_prefix_derived: ''
  arguments:
  - allocate: true
    annotation: a!
    dynamic_type: Tensor
    is_nullable: false
    kwarg_only: false
    name: out
    output: true
    type: Tensor &
  - annotation: null
    dynamic_type: Tensor
    is_nullable: false
    name: self
    type: const Tensor &
  - annotation: null
    dynamic_type: Tensor
    is_nullable: false
    name: other
    type: const Tensor &
  - annotation: null
    default: 1
    dynamic_type: Scalar
    is_nullable: false
    kwarg_only: true
    name: alpha
    type: Scalar
  method_of:
  - Type
  - namespace
  mode: native
  python_module: ''
  returns:
  - dynamic_type: Tensor
    name: out
    type: Tensor &
  inplace: false
  is_factory_method: null
  abstract: true
  requires_tensor: false
  device_guard: true
  with_gil: false
  deprecated: false
- name: add
  operator_name: add
  overload_name: Scalar
  use_c10_dispatcher: full
  category_override: ''
  matches_jit_signature: true
  schema_string: aten::add.Scalar(Tensor self, Scalar other, Scalar alpha=1) -> Tensor
  method_prefix_derived: ''
  arguments:
  - annotation: null
    dynamic_type: Tensor
    is_nullable: false
    name: self
    type: const Tensor &
  - annotation: null
    dynamic_type: Scalar
    is_nullable: false
    name: other
    type: Scalar
  - annotation: null
    default: 1
    dynamic_type: Scalar
    is_nullable: false
    name: alpha
    type: Scalar
  method_of:
  - Type
  - Tensor
  - namespace
  mode: native
  python_module: ''
  returns:
  - dynamic_type: Tensor
    name: result
    type: Tensor
  inplace: false
  is_factory_method: null
  abstract: false
  requires_tensor: false
  device_guard: true
  with_gil: false
  deprecated: false
- name: add_
  operator_name: add_
  overload_name: Scalar
  use_c10_dispatcher: unboxed_only
  category_override: ''
  matches_jit_signature: true
  schema_string: aten::add_.Scalar(Tensor(a!) self, Scalar other, Scalar alpha=1) -> Tensor(a!)
  method_prefix_derived: ''
  arguments:
  - annotation: a!
    dynamic_type: Tensor
    is_nullable: false
    name: self
    type: Tensor &
  - annotation: null
    dynamic_type: Scalar
    is_nullable: false
    name: other
    type: Scalar
  - annotation: null
    default: 1
    dynamic_type: Scalar
    is_nullable: false
    name: alpha
    type: Scalar
  method_of:
  - Type
  - Tensor
  mode: native
  python_module: ''
  returns:
  - dynamic_type: Tensor
    name: self
    type: Tensor &
  inplace: true
  is_factory_method: null
  abstract: false
  requires_tensor: false
  device_guard: true
  with_gil: false
  deprecated: false
- name: addmv
  operator_name: addmv
  overload_name: ''
  use_c10_dispatcher: full
  category_override: ''
  matches_jit_signature: true
  schema_string: aten::addmv(Tensor self, Tensor mat, Tensor vec, *, Scalar beta=1, Scalar alpha=1) -> Tensor
  method_prefix_derived: ''
  arguments:
  - annotation: null
    dynamic_type: Tensor
    is_nullable: false
    name: self
    type: const Tensor &
  - annotation: null
    dynamic_type: Tensor
    is_nullable: false
    name: mat
    type: const Tensor &
  - annotation: null
    dynamic_type: Tensor
    is_nullable: false
    name: vec
    type: const Tensor &
  - annotation: null
    default: 1
    dynamic_type: Scalar
    is_nullable: false
    kwarg_only: true
    name: beta
    type: Scalar
  - annotation: null
    default: 1
    dynamic_type: Scalar
    is_nullable: false
    kwarg_only: true
    name: alpha
    type: Scalar
  method_of:
  - Type
  - Tensor
  - namespace
  mode: native
  python_module: ''
  returns:
  - dynamic_type: Tensor
    name: result
    type: Tensor
  inplace: false
  is_factory_method: null
  abstract: true
  requires_tensor: false
  device_guard: true
  with_gil: false
  deprecated: false
- name: addmv_
  operator_name: addmv_
  overload_name: ''
  use_c10_dispatcher: unboxed_only
  category_override: ''
  matches_jit_signature: true
  schema_string: aten::addmv_(Tensor(a!) self, Tensor mat, Tensor vec, *, Scalar beta=1, Scalar alpha=1) -> Tensor(a!)
  method_prefix_derived: ''
  arguments:
  - annotation: a!
    dynamic_type: Tensor
    is_nullable: false
    name: self
    type: Tensor &
  - annotation: null
    dynamic_type: Tensor
    is_nullable: false
    name: mat
    type: const Tensor &
  - annotation: null
    dynamic_type: Tensor
    is_nullable: false
    name: vec
    type: const Tensor &
  - annotation: null
    default: 1
    dynamic_type: Scalar
    is_nullable: false
    kwarg_only: true
    name: beta
    type: Scalar
  - annotation: null
    default: 1
    dynamic_type: Scalar
    is_nullable: false
    kwarg_only: true
    name: alpha
    type: Scalar
  method_of:
  - Type
  - Tensor
  - namespace
  mode: native
  python_module: ''
  returns:
  - dynamic_type: Tensor
    name: self
    type: Tensor &
  inplace: true
  is_factory_method: null
  abstract: true
  requires_tensor: false
  device_guard: true
  with_gil: false
  deprecated: false
- name: addmv_out
  operator_name: addmv
  overload_name: out
  use_c10_dispatcher: unboxed_only
  category_override: ''
  matches_jit_signature: true
  schema_string: aten::addmv.out(Tensor self, Tensor mat, Tensor vec, *, Scalar beta=1, Scalar alpha=1, Tensor(a!) out) -> Tensor(a!)
  method_prefix_derived: ''
  arguments:
  - allocate: true
    annotation: a!
    dynamic_type: Tensor
    is_nullable: false
    kwarg_only: false
    name: out
    output: true
    type: Tensor &
  - annotation: null
    dynamic_type: Tensor
    is_nullable: false
    name: self
    type: const Tensor &
  - annotation: null
    dynamic_type: Tensor
    is_nullable: false
    name: mat
    type: const Tensor &
  - annotation: null
    dynamic_type: Tensor
    is_nullable: false
    name: vec
    type: const Tensor &
  - annotation: null
    default: 1
    dynamic_type: Scalar
    is_nullable: false
    kwarg_only: true
    name: beta
    type: Scalar
  - annotation: null
    default: 1
    dynamic_type: Scalar
    is_nullable: false
    kwarg_only: true
    name: alpha
    type: Scalar
  method_of:
  - Type
  - namespace
  mode: native
  python_module: ''
  returns:
  - dynamic_type: Tensor
    name: out
    type: Tensor &
  inplace: false
  is_factory_method: null
  abstract: true
  requires_tensor: false
  device_guard: true
  with_gil: false
  deprecated: false
- name: addr
  operator_name: addr
  overload_name: ''
  use_c10_dispatcher: full
  category_override: ''
  matches_jit_signature: true
  schema_string: aten::addr(Tensor self, Tensor vec1, Tensor vec2, *, Scalar beta=1, Scalar alpha=1) -> Tensor
  method_prefix_derived: ''
  arguments:
  - annotation: null
    dynamic_type: Tensor
    is_nullable: false
    name: self
    type: const Tensor &
  - annotation: null
    dynamic_type: Tensor
    is_nullable: false
    name: vec1
    type: const Tensor &
  - annotation: null
    dynamic_type: Tensor
    is_nullable: false
    name: vec2
    type: const Tensor &
  - annotation: null
    default: 1
    dynamic_type: Scalar
    is_nullable: false
    kwarg_only: true
    name: beta
    type: Scalar
  - annotation: null
    default: 1
    dynamic_type: Scalar
    is_nullable: false
    kwarg_only: true
    name: alpha
    type: Scalar
  method_of:
  - Type
  - Tensor
  - namespace
  mode: native
  python_module: ''
  returns:
  - dynamic_type: Tensor
    name: result
    type: Tensor
  inplace: false
  is_factory_method: null
  abstract: false
  requires_tensor: false
  device_guard: true
  with_gil: false
  deprecated: false
- name: addr_
  operator_name: addr_
  overload_name: ''
  use_c10_dispatcher: unboxed_only
  category_override: ''
  matches_jit_signature: true
  schema_string: aten::addr_(Tensor(a!) self, Tensor vec1, Tensor vec2, *, Scalar beta=1, Scalar alpha=1) -> Tensor(a!)
  method_prefix_derived: ''
  arguments:
  - annotation: a!
    dynamic_type: Tensor
    is_nullable: false
    name: self
    type: Tensor &
  - annotation: null
    dynamic_type: Tensor
    is_nullable: false
    name: vec1
    type: const Tensor &
  - annotation: null
    dynamic_type: Tensor
    is_nullable: false
    name: vec2
    type: const Tensor &
  - annotation: null
    default: 1
    dynamic_type: Scalar
    is_nullable: false
    kwarg_only: true
    name: beta
    type: Scalar
  - annotation: null
    default: 1
    dynamic_type: Scalar
    is_nullable: false
    kwarg_only: true
    name: alpha
    type: Scalar
  method_of:
  - Type
  - Tensor
  mode: native
  python_module: ''
  returns:
  - dynamic_type: Tensor
    name: self
    type: Tensor &
  inplace: true
  is_factory_method: null
  abstract: false
  requires_tensor: false
  device_guard: true
  with_gil: false
  deprecated: false
- name: addr_out
  operator_name: addr
  overload_name: out
  use_c10_dispatcher: unboxed_only
  category_override: ''
  matches_jit_signature: true
  schema_string: aten::addr.out(Tensor self, Tensor vec1, Tensor vec2, *, Scalar beta=1, Scalar alpha=1, Tensor(a!) out) -> Tensor(a!)
  method_prefix_derived: ''
  arguments:
  - allocate: true
    annotation: a!
    dynamic_type: Tensor
    is_nullable: false
    kwarg_only: false
    name: out
    output: true
    type: Tensor &
  - annotation: null
    dynamic_type: Tensor
    is_nullable: false
    name: self
    type: const Tensor &
  - annotation: null
    dynamic_type: Tensor
    is_nullable: false
    name: vec1
    type: const Tensor &
  - annotation: null
    dynamic_type: Tensor
    is_nullable: false
    name: vec2
    type: const Tensor &
  - annotation: null
    default: 1
    dynamic_type: Scalar
    is_nullable: false
    kwarg_only: true
    name: beta
    type: Scalar
  - annotation: null
    default: 1
    dynamic_type: Scalar
    is_nullable: false
    kwarg_only: true
    name: alpha
    type: Scalar
  method_of:
  - Type
  - namespace
  mode: native
  python_module: ''
  returns:
  - dynamic_type: Tensor
    name: out
    type: Tensor &
  inplace: false
  is_factory_method: null
  abstract: false
  requires_tensor: false
  device_guard: true
  with_gil: false
  deprecated: false
- name: affine_grid_generator
  operator_name: affine_grid_generator
  overload_name: ''
  use_c10_dispatcher: unboxed_only
  category_override: ''
  matches_jit_signature: true
  schema_string: aten::affine_grid_generator(Tensor theta, int[] size, bool align_corners) -> Tensor
  method_prefix_derived: ''
  arguments:
  - annotation: null
    dynamic_type: Tensor
    is_nullable: false
    name: theta
    type: const Tensor &
  - annotation: null
    dynamic_type: IntArrayRef
    is_nullable: false
    name: size
    type: IntArrayRef
  - annotation: null
    dynamic_type: bool
    is_nullable: false
    name: align_corners
    type: bool
  method_of:
  - Type
  - namespace
  mode: native
  python_module: ''
  returns:
  - dynamic_type: Tensor
    name: result
    type: Tensor
  inplace: false
  is_factory_method: null
  abstract: false
  requires_tensor: false
  device_guard: true
  with_gil: false
  deprecated: false
- name: affine_grid_generator_backward
  operator_name: affine_grid_generator_backward
  overload_name: ''
  use_c10_dispatcher: unboxed_only
  category_override: ''
  matches_jit_signature: true
  schema_string: aten::affine_grid_generator_backward(Tensor grad, int[] size, bool align_corners) -> Tensor
  method_prefix_derived: ''
  arguments:
  - annotation: null
    dynamic_type: Tensor
    is_nullable: false
    name: grad
    type: const Tensor &
  - annotation: null
    dynamic_type: IntArrayRef
    is_nullable: false
    name: size
    type: IntArrayRef
  - annotation: null
    dynamic_type: bool
    is_nullable: false
    name: align_corners
    type: bool
  method_of:
  - Type
  - namespace
  mode: native
  python_module: ''
  returns:
  - dynamic_type: Tensor
    name: result
    type: Tensor
  inplace: false
  is_factory_method: null
  abstract: false
  requires_tensor: false
  device_guard: true
  with_gil: false
  deprecated: false
- name: all
  operator_name: all
  overload_name: dim
  use_c10_dispatcher: full
  category_override: ''
  matches_jit_signature: true
  schema_string: aten::all.dim(Tensor self, int dim, bool keepdim=False) -> Tensor
  method_prefix_derived: ''
  arguments:
  - annotation: null
    dynamic_type: Tensor
    is_nullable: false
    name: self
    type: const Tensor &
  - annotation: null
    dynamic_type: int64_t
    is_nullable: false
    name: dim
    type: int64_t
  - annotation: null
    default: false
    dynamic_type: bool
    is_nullable: false
    name: keepdim
    type: bool
  method_of:
  - Type
  - Tensor
  - namespace
  mode: native
  python_module: ''
  returns:
  - dynamic_type: Tensor
    name: result
    type: Tensor
  inplace: false
  is_factory_method: null
  abstract: false
  requires_tensor: false
  device_guard: true
  with_gil: false
  deprecated: false
- name: all_out
  operator_name: all
  overload_name: out
  use_c10_dispatcher: unboxed_only
  category_override: ''
  matches_jit_signature: true
  schema_string: aten::all.out(Tensor self, int dim, bool keepdim=False, *, Tensor(a!) out) -> Tensor(a!)
  method_prefix_derived: ''
  arguments:
  - allocate: true
    annotation: a!
    dynamic_type: Tensor
    is_nullable: false
    kwarg_only: false
    name: out
    output: true
    type: Tensor &
  - annotation: null
    dynamic_type: Tensor
    is_nullable: false
    name: self
    type: const Tensor &
  - annotation: null
    dynamic_type: int64_t
    is_nullable: false
    name: dim
    type: int64_t
  - annotation: null
    default: false
    dynamic_type: bool
    is_nullable: false
    name: keepdim
    type: bool
  method_of:
  - Type
  - namespace
  mode: native
  python_module: ''
  returns:
  - dynamic_type: Tensor
    name: out
    type: Tensor &
  inplace: false
  is_factory_method: null
  abstract: false
  requires_tensor: false
  device_guard: true
  with_gil: false
  deprecated: false
- name: all
  operator_name: all
  overload_name: dimname
  use_c10_dispatcher: unboxed_only
  category_override: ''
  matches_jit_signature: true
  schema_string: aten::all.dimname(Tensor self, Dimname dim, bool keepdim=False) -> Tensor
  method_prefix_derived: ''
  arguments:
  - annotation: null
    dynamic_type: Tensor
    is_nullable: false
    name: self
    type: const Tensor &
  - annotation: null
    dynamic_type: Dimname
    is_nullable: false
    name: dim
    type: Dimname
  - annotation: null
    default: false
    dynamic_type: bool
    is_nullable: false
    name: keepdim
    type: bool
  method_of:
  - Type
  - Tensor
  - namespace
  mode: native
  python_module: ''
  returns:
  - dynamic_type: Tensor
    name: result
    type: Tensor
  inplace: false
  is_factory_method: null
  abstract: false
  requires_tensor: false
  device_guard: true
  with_gil: false
  deprecated: false
- name: all_out
  operator_name: all
  overload_name: dimname_out
  use_c10_dispatcher: unboxed_only
  category_override: ''
  matches_jit_signature: true
  schema_string: aten::all.dimname_out(Tensor self, Dimname dim, bool keepdim=False, *, Tensor(a!) out) -> Tensor(a!)
  method_prefix_derived: ''
  arguments:
  - allocate: true
    annotation: a!
    dynamic_type: Tensor
    is_nullable: false
    kwarg_only: false
    name: out
    output: true
    type: Tensor &
  - annotation: null
    dynamic_type: Tensor
    is_nullable: false
    name: self
    type: const Tensor &
  - annotation: null
    dynamic_type: Dimname
    is_nullable: false
    name: dim
    type: Dimname
  - annotation: null
    default: false
    dynamic_type: bool
    is_nullable: false
    name: keepdim
    type: bool
  method_of:
  - Type
  - namespace
  mode: native
  python_module: ''
  returns:
  - dynamic_type: Tensor
    name: out
    type: Tensor &
  inplace: false
  is_factory_method: null
  abstract: false
  requires_tensor: false
  device_guard: true
  with_gil: false
  deprecated: false
- name: allclose
  operator_name: allclose
  overload_name: ''
  use_c10_dispatcher: full
  category_override: ''
  matches_jit_signature: true
  schema_string: aten::allclose(Tensor self, Tensor other, float rtol=1e-05, float atol=1e-08, bool equal_nan=False) -> bool
  method_prefix_derived: ''
  arguments:
  - annotation: null
    dynamic_type: Tensor
    is_nullable: false
    name: self
    type: const Tensor &
  - annotation: null
    dynamic_type: Tensor
    is_nullable: false
    name: other
    type: const Tensor &
  - annotation: null
    default: 1.0e-05
    dynamic_type: double
    is_nullable: false
    name: rtol
    type: double
  - annotation: null
    default: 1.0e-08
    dynamic_type: double
    is_nullable: false
    name: atol
    type: double
  - annotation: null
    default: false
    dynamic_type: bool
    is_nullable: false
    name: equal_nan
    type: bool
  method_of:
  - Type
  - Tensor
  - namespace
  mode: native
  python_module: ''
  returns:
  - dynamic_type: bool
    name: result
    type: bool
  inplace: false
  is_factory_method: null
  abstract: false
  requires_tensor: false
  device_guard: true
  with_gil: false
  deprecated: false
- name: any
  operator_name: any
  overload_name: dim
  use_c10_dispatcher: full
  category_override: ''
  matches_jit_signature: true
  schema_string: aten::any.dim(Tensor self, int dim, bool keepdim=False) -> Tensor
  method_prefix_derived: ''
  arguments:
  - annotation: null
    dynamic_type: Tensor
    is_nullable: false
    name: self
    type: const Tensor &
  - annotation: null
    dynamic_type: int64_t
    is_nullable: false
    name: dim
    type: int64_t
  - annotation: null
    default: false
    dynamic_type: bool
    is_nullable: false
    name: keepdim
    type: bool
  method_of:
  - Type
  - Tensor
  - namespace
  mode: native
  python_module: ''
  returns:
  - dynamic_type: Tensor
    name: result
    type: Tensor
  inplace: false
  is_factory_method: null
  abstract: false
  requires_tensor: false
  device_guard: true
  with_gil: false
  deprecated: false
- name: any_out
  operator_name: any
  overload_name: out
  use_c10_dispatcher: unboxed_only
  category_override: ''
  matches_jit_signature: true
  schema_string: aten::any.out(Tensor self, int dim, bool keepdim=False, *, Tensor(a!) out) -> Tensor(a!)
  method_prefix_derived: ''
  arguments:
  - allocate: true
    annotation: a!
    dynamic_type: Tensor
    is_nullable: false
    kwarg_only: false
    name: out
    output: true
    type: Tensor &
  - annotation: null
    dynamic_type: Tensor
    is_nullable: false
    name: self
    type: const Tensor &
  - annotation: null
    dynamic_type: int64_t
    is_nullable: false
    name: dim
    type: int64_t
  - annotation: null
    default: false
    dynamic_type: bool
    is_nullable: false
    name: keepdim
    type: bool
  method_of:
  - Type
  - namespace
  mode: native
  python_module: ''
  returns:
  - dynamic_type: Tensor
    name: out
    type: Tensor &
  inplace: false
  is_factory_method: null
  abstract: false
  requires_tensor: false
  device_guard: true
  with_gil: false
  deprecated: false
- name: any
  operator_name: any
  overload_name: dimname
  use_c10_dispatcher: unboxed_only
  category_override: ''
  matches_jit_signature: true
  schema_string: aten::any.dimname(Tensor self, Dimname dim, bool keepdim=False) -> Tensor
  method_prefix_derived: ''
  arguments:
  - annotation: null
    dynamic_type: Tensor
    is_nullable: false
    name: self
    type: const Tensor &
  - annotation: null
    dynamic_type: Dimname
    is_nullable: false
    name: dim
    type: Dimname
  - annotation: null
    default: false
    dynamic_type: bool
    is_nullable: false
    name: keepdim
    type: bool
  method_of:
  - Type
  - Tensor
  - namespace
  mode: native
  python_module: ''
  returns:
  - dynamic_type: Tensor
    name: result
    type: Tensor
  inplace: false
  is_factory_method: null
  abstract: false
  requires_tensor: false
  device_guard: true
  with_gil: false
  deprecated: false
- name: any_out
  operator_name: any
  overload_name: dimname_out
  use_c10_dispatcher: unboxed_only
  category_override: ''
  matches_jit_signature: true
  schema_string: aten::any.dimname_out(Tensor self, Dimname dim, bool keepdim=False, *, Tensor(a!) out) -> Tensor(a!)
  method_prefix_derived: ''
  arguments:
  - allocate: true
    annotation: a!
    dynamic_type: Tensor
    is_nullable: false
    kwarg_only: false
    name: out
    output: true
    type: Tensor &
  - annotation: null
    dynamic_type: Tensor
    is_nullable: false
    name: self
    type: const Tensor &
  - annotation: null
    dynamic_type: Dimname
    is_nullable: false
    name: dim
    type: Dimname
  - annotation: null
    default: false
    dynamic_type: bool
    is_nullable: false
    name: keepdim
    type: bool
  method_of:
  - Type
  - namespace
  mode: native
  python_module: ''
  returns:
  - dynamic_type: Tensor
    name: out
    type: Tensor &
  inplace: false
  is_factory_method: null
  abstract: false
  requires_tensor: false
  device_guard: true
  with_gil: false
  deprecated: false
- name: arange
  operator_name: arange
  overload_name: ''
  use_c10_dispatcher: unboxed_only
  category_override: ''
  matches_jit_signature: true
  schema_string: aten::arange(Scalar end, *, ScalarType? dtype=None, Layout? layout=None, Device? device=None, bool? pin_memory=None) -> Tensor
  method_prefix_derived: ''
  arguments:
  - annotation: null
    dynamic_type: Scalar
    is_nullable: false
    name: end
    type: Scalar
  - annotation: null
    default: '{}'
    dynamic_type: TensorOptions
    is_nullable: false
    kwarg_only: true
    name: options
    type: const TensorOptions &
  method_of:
  - Type
  - namespace
  mode: native
  python_module: ''
  returns:
  - dynamic_type: Tensor
    name: result
    type: Tensor
  inplace: false
  is_factory_method: true
  abstract: false
  requires_tensor: false
  device_guard: true
  with_gil: false
  deprecated: false
- name: arange
  operator_name: arange
  overload_name: start
  use_c10_dispatcher: unboxed_only
  category_override: ''
  matches_jit_signature: true
  schema_string: aten::arange.start(Scalar start, Scalar end, *, ScalarType? dtype=None, Layout? layout=None, Device? device=None, bool? pin_memory=None) -> Tensor
  method_prefix_derived: ''
  arguments:
  - annotation: null
    dynamic_type: Scalar
    is_nullable: false
    name: start
    type: Scalar
  - annotation: null
    dynamic_type: Scalar
    is_nullable: false
    name: end
    type: Scalar
  - annotation: null
    default: '{}'
    dynamic_type: TensorOptions
    is_nullable: false
    kwarg_only: true
    name: options
    type: const TensorOptions &
  method_of:
  - Type
  - namespace
  mode: native
  python_module: ''
  returns:
  - dynamic_type: Tensor
    name: result
    type: Tensor
  inplace: false
  is_factory_method: true
  abstract: false
  requires_tensor: false
  device_guard: true
  with_gil: false
  deprecated: false
- name: arange
  operator_name: arange
  overload_name: start_step
  use_c10_dispatcher: unboxed_only
  category_override: ''
  matches_jit_signature: true
  schema_string: aten::arange.start_step(Scalar start, Scalar end, Scalar step, *, ScalarType? dtype=None, Layout? layout=None, Device? device=None, bool? pin_memory=None) -> Tensor
  method_prefix_derived: ''
  arguments:
  - annotation: null
    dynamic_type: Scalar
    is_nullable: false
    name: start
    type: Scalar
  - annotation: null
    dynamic_type: Scalar
    is_nullable: false
    name: end
    type: Scalar
  - annotation: null
    dynamic_type: Scalar
    is_nullable: false
    name: step
    type: Scalar
  - annotation: null
    default: '{}'
    dynamic_type: TensorOptions
    is_nullable: false
    kwarg_only: true
    name: options
    type: const TensorOptions &
  method_of:
  - Type
  - namespace
  mode: native
  python_module: ''
  returns:
  - dynamic_type: Tensor
    name: result
    type: Tensor
  inplace: false
  is_factory_method: true
  abstract: false
  requires_tensor: false
  device_guard: true
  with_gil: false
  deprecated: false
- name: arange_out
  operator_name: arange
  overload_name: out
  use_c10_dispatcher: unboxed_only
  category_override: ''
  matches_jit_signature: true
  schema_string: aten::arange.out(Scalar end, *, Tensor(a!) out) -> Tensor(a!)
  method_prefix_derived: ''
  arguments:
  - allocate: true
    annotation: a!
    dynamic_type: Tensor
    is_nullable: false
    kwarg_only: false
    name: out
    output: true
    type: Tensor &
  - annotation: null
    dynamic_type: Scalar
    is_nullable: false
    name: end
    type: Scalar
  method_of:
  - Type
  - namespace
  mode: native
  python_module: ''
  returns:
  - dynamic_type: Tensor
    name: out
    type: Tensor &
  inplace: false
  is_factory_method: null
  abstract: false
  requires_tensor: false
  device_guard: true
  with_gil: false
  deprecated: false
- name: arange_out
  operator_name: arange
  overload_name: start_out
  use_c10_dispatcher: unboxed_only
  category_override: ''
  matches_jit_signature: true
  schema_string: aten::arange.start_out(Scalar start, Scalar end, Scalar step=1, *, Tensor(a!) out) -> Tensor(a!)
  method_prefix_derived: ''
  arguments:
  - allocate: true
    annotation: a!
    dynamic_type: Tensor
    is_nullable: false
    kwarg_only: false
    name: out
    output: true
    type: Tensor &
  - annotation: null
    dynamic_type: Scalar
    is_nullable: false
    name: start
    type: Scalar
  - annotation: null
    dynamic_type: Scalar
    is_nullable: false
    name: end
    type: Scalar
  - annotation: null
    default: 1
    dynamic_type: Scalar
    is_nullable: false
    name: step
    type: Scalar
  method_of:
  - Type
  - namespace
  mode: native
  python_module: ''
  returns:
  - dynamic_type: Tensor
    name: out
    type: Tensor &
  inplace: false
  is_factory_method: null
  abstract: true
  requires_tensor: false
  device_guard: true
  with_gil: false
  deprecated: false
- name: _dim_arange
  operator_name: _dim_arange
  overload_name: ''
  use_c10_dispatcher: full
  category_override: ''
  matches_jit_signature: true
  schema_string: aten::_dim_arange(Tensor like, int dim) -> Tensor
  method_prefix_derived: ''
  arguments:
  - annotation: null
    dynamic_type: Tensor
    is_nullable: false
    name: like
    type: const Tensor &
  - annotation: null
    dynamic_type: int64_t
    is_nullable: false
    name: dim
    type: int64_t
  method_of:
  - Type
  - namespace
  mode: native
  python_module: ''
  returns:
  - dynamic_type: Tensor
    name: result
    type: Tensor
  inplace: false
  is_factory_method: null
  abstract: false
  requires_tensor: false
  device_guard: true
  with_gil: false
  deprecated: false
- name: argmax
  operator_name: argmax
  overload_name: ''
  use_c10_dispatcher: full
  category_override: ''
  matches_jit_signature: true
  schema_string: aten::argmax(Tensor self, int? dim=None, bool keepdim=False) -> Tensor
  method_prefix_derived: ''
  arguments:
  - annotation: null
    dynamic_type: Tensor
    is_nullable: false
    name: self
    type: const Tensor &
  - annotation: null
    default: c10::nullopt
    dynamic_type: int64_t
    is_nullable: true
    name: dim
    type: c10::optional<int64_t>
  - annotation: null
    default: false
    dynamic_type: bool
    is_nullable: false
    name: keepdim
    type: bool
  method_of:
  - Type
  - Tensor
  - namespace
  mode: native
  python_module: ''
  returns:
  - dynamic_type: Tensor
    name: result
    type: Tensor
  inplace: false
  is_factory_method: null
  abstract: false
  requires_tensor: false
  device_guard: true
  with_gil: false
  deprecated: false
- name: argmin
  operator_name: argmin
  overload_name: ''
  use_c10_dispatcher: full
  category_override: ''
  matches_jit_signature: true
  schema_string: aten::argmin(Tensor self, int? dim=None, bool keepdim=False) -> Tensor
  method_prefix_derived: ''
  arguments:
  - annotation: null
    dynamic_type: Tensor
    is_nullable: false
    name: self
    type: const Tensor &
  - annotation: null
    default: c10::nullopt
    dynamic_type: int64_t
    is_nullable: true
    name: dim
    type: c10::optional<int64_t>
  - annotation: null
    default: false
    dynamic_type: bool
    is_nullable: false
    name: keepdim
    type: bool
  method_of:
  - Type
  - Tensor
  - namespace
  mode: native
  python_module: ''
  returns:
  - dynamic_type: Tensor
    name: result
    type: Tensor
  inplace: false
  is_factory_method: null
  abstract: false
  requires_tensor: false
  device_guard: true
  with_gil: false
  deprecated: false
- name: as_strided
  operator_name: as_strided
  overload_name: ''
  use_c10_dispatcher: unboxed_only
  category_override: ''
  matches_jit_signature: true
  schema_string: aten::as_strided(Tensor(a) self, int[] size, int[] stride, int? storage_offset=None) -> Tensor(a)
  method_prefix_derived: ''
  arguments:
  - annotation: a
    dynamic_type: Tensor
    is_nullable: false
    name: self
    type: const Tensor &
  - annotation: null
    dynamic_type: IntArrayRef
    is_nullable: false
    name: size
    type: IntArrayRef
  - annotation: null
    dynamic_type: IntArrayRef
    is_nullable: false
    name: stride
    type: IntArrayRef
  - annotation: null
    default: c10::nullopt
    dynamic_type: int64_t
    is_nullable: true
    name: storage_offset
    type: c10::optional<int64_t>
  method_of:
  - Type
  - Tensor
  - namespace
  mode: native
  python_module: ''
  returns:
  - dynamic_type: Tensor
    name: result
    type: Tensor
  inplace: false
  is_factory_method: null
  abstract: true
  requires_tensor: false
  device_guard: false
  with_gil: false
  deprecated: false
- name: as_strided_
  operator_name: as_strided_
  overload_name: ''
  use_c10_dispatcher: unboxed_only
  category_override: ''
  matches_jit_signature: true
  schema_string: aten::as_strided_(Tensor(a!) self, int[] size, int[] stride, int? storage_offset=None) -> Tensor(a!)
  method_prefix_derived: ''
  arguments:
  - annotation: a!
    dynamic_type: Tensor
    is_nullable: false
    name: self
    type: Tensor &
  - annotation: null
    dynamic_type: IntArrayRef
    is_nullable: false
    name: size
    type: IntArrayRef
  - annotation: null
    dynamic_type: IntArrayRef
    is_nullable: false
    name: stride
    type: IntArrayRef
  - annotation: null
    default: c10::nullopt
    dynamic_type: int64_t
    is_nullable: true
    name: storage_offset
    type: c10::optional<int64_t>
  method_of:
  - Type
  - Tensor
  - namespace
  mode: native
  python_module: ''
  returns:
  - dynamic_type: Tensor
    name: self
    type: Tensor &
  inplace: true
  is_factory_method: null
  abstract: false
  requires_tensor: false
  device_guard: false
  with_gil: false
  deprecated: false
- name: asin
  operator_name: asin
  overload_name: ''
  use_c10_dispatcher: full
  category_override: ''
  matches_jit_signature: true
  schema_string: aten::asin(Tensor self) -> Tensor
  method_prefix_derived: ''
  arguments:
  - annotation: null
    dynamic_type: Tensor
    is_nullable: false
    name: self
    type: const Tensor &
  method_of:
  - Type
  - Tensor
  - namespace
  mode: native
  python_module: ''
  returns:
  - dynamic_type: Tensor
    name: result
    type: Tensor
  inplace: false
  is_factory_method: null
  abstract: false
  requires_tensor: false
  device_guard: true
  with_gil: false
  deprecated: false
- name: asin_
  operator_name: asin_
  overload_name: ''
  use_c10_dispatcher: unboxed_only
  category_override: ''
  matches_jit_signature: true
  schema_string: aten::asin_(Tensor(a!) self) -> Tensor(a!)
  method_prefix_derived: ''
  arguments:
  - annotation: a!
    dynamic_type: Tensor
    is_nullable: false
    name: self
    type: Tensor &
  method_of:
  - Type
  - Tensor
  - namespace
  mode: native
  python_module: ''
  returns:
  - dynamic_type: Tensor
    name: self
    type: Tensor &
  inplace: true
  is_factory_method: null
  abstract: false
  requires_tensor: false
  device_guard: true
  with_gil: false
  deprecated: false
- name: asin_out
  operator_name: asin
  overload_name: out
  use_c10_dispatcher: unboxed_only
  category_override: ''
  matches_jit_signature: true
  schema_string: aten::asin.out(Tensor self, *, Tensor(a!) out) -> Tensor(a!)
  method_prefix_derived: ''
  arguments:
  - allocate: true
    annotation: a!
    dynamic_type: Tensor
    is_nullable: false
    kwarg_only: false
    name: out
    output: true
    type: Tensor &
  - annotation: null
    dynamic_type: Tensor
    is_nullable: false
    name: self
    type: const Tensor &
  method_of:
  - Type
  - namespace
  mode: native
  python_module: ''
  returns:
  - dynamic_type: Tensor
    name: out
    type: Tensor &
  inplace: false
  is_factory_method: null
  abstract: false
  requires_tensor: false
  device_guard: true
  with_gil: false
  deprecated: false
- name: atan
  operator_name: atan
  overload_name: ''
  use_c10_dispatcher: full
  category_override: ''
  matches_jit_signature: true
  schema_string: aten::atan(Tensor self) -> Tensor
  method_prefix_derived: ''
  arguments:
  - annotation: null
    dynamic_type: Tensor
    is_nullable: false
    name: self
    type: const Tensor &
  method_of:
  - Type
  - Tensor
  - namespace
  mode: native
  python_module: ''
  returns:
  - dynamic_type: Tensor
    name: result
    type: Tensor
  inplace: false
  is_factory_method: null
  abstract: false
  requires_tensor: false
  device_guard: true
  with_gil: false
  deprecated: false
- name: atan_
  operator_name: atan_
  overload_name: ''
  use_c10_dispatcher: unboxed_only
  category_override: ''
  matches_jit_signature: true
  schema_string: aten::atan_(Tensor(a!) self) -> Tensor(a!)
  method_prefix_derived: ''
  arguments:
  - annotation: a!
    dynamic_type: Tensor
    is_nullable: false
    name: self
    type: Tensor &
  method_of:
  - Type
  - Tensor
  - namespace
  mode: native
  python_module: ''
  returns:
  - dynamic_type: Tensor
    name: self
    type: Tensor &
  inplace: true
  is_factory_method: null
  abstract: true
  requires_tensor: false
  device_guard: true
  with_gil: false
  deprecated: false
- name: atan_out
  operator_name: atan
  overload_name: out
  use_c10_dispatcher: unboxed_only
  category_override: ''
  matches_jit_signature: true
  schema_string: aten::atan.out(Tensor self, *, Tensor(a!) out) -> Tensor(a!)
  method_prefix_derived: ''
  arguments:
  - allocate: true
    annotation: a!
    dynamic_type: Tensor
    is_nullable: false
    kwarg_only: false
    name: out
    output: true
    type: Tensor &
  - annotation: null
    dynamic_type: Tensor
    is_nullable: false
    name: self
    type: const Tensor &
  method_of:
  - Type
  - namespace
  mode: native
  python_module: ''
  returns:
  - dynamic_type: Tensor
    name: out
    type: Tensor &
  inplace: false
  is_factory_method: null
  abstract: true
  requires_tensor: false
  device_guard: true
  with_gil: false
  deprecated: false
- name: baddbmm
  operator_name: baddbmm
  overload_name: ''
  use_c10_dispatcher: full
  category_override: ''
  matches_jit_signature: true
  schema_string: aten::baddbmm(Tensor self, Tensor batch1, Tensor batch2, *, Scalar beta=1, Scalar alpha=1) -> Tensor
  method_prefix_derived: ''
  arguments:
  - annotation: null
    dynamic_type: Tensor
    is_nullable: false
    name: self
    type: const Tensor &
  - annotation: null
    dynamic_type: Tensor
    is_nullable: false
    name: batch1
    type: const Tensor &
  - annotation: null
    dynamic_type: Tensor
    is_nullable: false
    name: batch2
    type: const Tensor &
  - annotation: null
    default: 1
    dynamic_type: Scalar
    is_nullable: false
    kwarg_only: true
    name: beta
    type: Scalar
  - annotation: null
    default: 1
    dynamic_type: Scalar
    is_nullable: false
    kwarg_only: true
    name: alpha
    type: Scalar
  method_of:
  - Type
  - Tensor
  - namespace
  mode: native
  python_module: ''
  returns:
  - dynamic_type: Tensor
    name: result
    type: Tensor
  inplace: false
  is_factory_method: null
  abstract: true
  requires_tensor: false
  device_guard: true
  with_gil: false
  deprecated: false
- name: baddbmm_
  operator_name: baddbmm_
  overload_name: ''
  use_c10_dispatcher: unboxed_only
  category_override: ''
  matches_jit_signature: true
  schema_string: aten::baddbmm_(Tensor(a!) self, Tensor batch1, Tensor batch2, *, Scalar beta=1, Scalar alpha=1) -> Tensor(a!)
  method_prefix_derived: ''
  arguments:
  - annotation: a!
    dynamic_type: Tensor
    is_nullable: false
    name: self
    type: Tensor &
  - annotation: null
    dynamic_type: Tensor
    is_nullable: false
    name: batch1
    type: const Tensor &
  - annotation: null
    dynamic_type: Tensor
    is_nullable: false
    name: batch2
    type: const Tensor &
  - annotation: null
    default: 1
    dynamic_type: Scalar
    is_nullable: false
    kwarg_only: true
    name: beta
    type: Scalar
  - annotation: null
    default: 1
    dynamic_type: Scalar
    is_nullable: false
    kwarg_only: true
    name: alpha
    type: Scalar
  method_of:
  - Type
  - Tensor
  mode: native
  python_module: ''
  returns:
  - dynamic_type: Tensor
    name: self
    type: Tensor &
  inplace: true
  is_factory_method: null
  abstract: true
  requires_tensor: false
  device_guard: true
  with_gil: false
  deprecated: false
- name: _baddbmm_mkl_
  operator_name: _baddbmm_mkl_
  overload_name: ''
  use_c10_dispatcher: unboxed_only
  category_override: ''
  matches_jit_signature: true
  schema_string: aten::_baddbmm_mkl_(Tensor(a!) self, Tensor batch1, Tensor batch2, *, Scalar beta=1, Scalar alpha=1) -> Tensor(a!)
  method_prefix_derived: ''
  arguments:
  - annotation: a!
    dynamic_type: Tensor
    is_nullable: false
    name: self
    type: Tensor &
  - annotation: null
    dynamic_type: Tensor
    is_nullable: false
    name: batch1
    type: const Tensor &
  - annotation: null
    dynamic_type: Tensor
    is_nullable: false
    name: batch2
    type: const Tensor &
  - annotation: null
    default: 1
    dynamic_type: Scalar
    is_nullable: false
    kwarg_only: true
    name: beta
    type: Scalar
  - annotation: null
    default: 1
    dynamic_type: Scalar
    is_nullable: false
    kwarg_only: true
    name: alpha
    type: Scalar
  method_of:
  - Type
  - namespace
  mode: native
  python_module: ''
  returns:
  - dynamic_type: Tensor
    name: self
    type: Tensor &
  inplace: true
  is_factory_method: null
  abstract: false
  requires_tensor: false
  device_guard: true
  with_gil: false
  deprecated: false
- name: baddbmm_out
  operator_name: baddbmm
  overload_name: out
  use_c10_dispatcher: unboxed_only
  category_override: ''
  matches_jit_signature: true
  schema_string: aten::baddbmm.out(Tensor self, Tensor batch1, Tensor batch2, *, Scalar beta=1, Scalar alpha=1, Tensor(a!) out) -> Tensor(a!)
  method_prefix_derived: ''
  arguments:
  - allocate: true
    annotation: a!
    dynamic_type: Tensor
    is_nullable: false
    kwarg_only: false
    name: out
    output: true
    type: Tensor &
  - annotation: null
    dynamic_type: Tensor
    is_nullable: false
    name: self
    type: const Tensor &
  - annotation: null
    dynamic_type: Tensor
    is_nullable: false
    name: batch1
    type: const Tensor &
  - annotation: null
    dynamic_type: Tensor
    is_nullable: false
    name: batch2
    type: const Tensor &
  - annotation: null
    default: 1
    dynamic_type: Scalar
    is_nullable: false
    kwarg_only: true
    name: beta
    type: Scalar
  - annotation: null
    default: 1
    dynamic_type: Scalar
    is_nullable: false
    kwarg_only: true
    name: alpha
    type: Scalar
  method_of:
  - Type
  - namespace
  mode: native
  python_module: ''
  returns:
  - dynamic_type: Tensor
    name: out
    type: Tensor &
  inplace: false
  is_factory_method: null
  abstract: true
  requires_tensor: false
  device_guard: true
  with_gil: false
  deprecated: false
- name: bartlett_window
  operator_name: bartlett_window
  overload_name: ''
  use_c10_dispatcher: unboxed_only
  category_override: ''
  matches_jit_signature: true
  schema_string: aten::bartlett_window(int window_length, *, ScalarType? dtype=None, Layout? layout=None, Device? device=None, bool? pin_memory=None) -> Tensor
  method_prefix_derived: ''
  arguments:
  - annotation: null
    dynamic_type: int64_t
    is_nullable: false
    name: window_length
    type: int64_t
  - annotation: null
    default: '{}'
    dynamic_type: TensorOptions
    is_nullable: false
    kwarg_only: true
    name: options
    type: const TensorOptions &
  method_of:
  - Type
  - namespace
  mode: native
  python_module: ''
  returns:
  - dynamic_type: Tensor
    name: result
    type: Tensor
  inplace: false
  is_factory_method: true
  abstract: false
  requires_tensor: false
  device_guard: true
  with_gil: false
  deprecated: false
- name: bartlett_window
  operator_name: bartlett_window
  overload_name: periodic
  use_c10_dispatcher: unboxed_only
  category_override: ''
  matches_jit_signature: true
  schema_string: aten::bartlett_window.periodic(int window_length, bool periodic, *, ScalarType? dtype=None, Layout? layout=None, Device? device=None, bool? pin_memory=None) -> Tensor
  method_prefix_derived: ''
  arguments:
  - annotation: null
    dynamic_type: int64_t
    is_nullable: false
    name: window_length
    type: int64_t
  - annotation: null
    dynamic_type: bool
    is_nullable: false
    name: periodic
    type: bool
  - annotation: null
    default: '{}'
    dynamic_type: TensorOptions
    is_nullable: false
    kwarg_only: true
    name: options
    type: const TensorOptions &
  method_of:
  - Type
  - namespace
  mode: native
  python_module: ''
  returns:
  - dynamic_type: Tensor
    name: result
    type: Tensor
  inplace: false
  is_factory_method: true
  abstract: false
  requires_tensor: false
  device_guard: true
  with_gil: false
  deprecated: false
- name: batch_norm
  operator_name: batch_norm
  overload_name: ''
  use_c10_dispatcher: unboxed_only
  category_override: ''
  matches_jit_signature: true
  schema_string: aten::batch_norm(Tensor input, Tensor? weight, Tensor? bias, Tensor? running_mean, Tensor? running_var, bool training, float momentum, float eps, bool cudnn_enabled) -> Tensor
  method_prefix_derived: ''
  arguments:
  - annotation: null
    dynamic_type: Tensor
    is_nullable: false
    name: input
    type: const Tensor &
  - annotation: null
    dynamic_type: Tensor
    is_nullable: true
    name: weight
    type: const Tensor &
  - annotation: null
    dynamic_type: Tensor
    is_nullable: true
    name: bias
    type: const Tensor &
  - annotation: null
    dynamic_type: Tensor
    is_nullable: true
    name: running_mean
    type: const Tensor &
  - annotation: null
    dynamic_type: Tensor
    is_nullable: true
    name: running_var
    type: const Tensor &
  - annotation: null
    dynamic_type: bool
    is_nullable: false
    name: training
    type: bool
  - annotation: null
    dynamic_type: double
    is_nullable: false
    name: momentum
    type: double
  - annotation: null
    dynamic_type: double
    is_nullable: false
    name: eps
    type: double
  - annotation: null
    dynamic_type: bool
    is_nullable: false
    name: cudnn_enabled
    type: bool
  method_of:
  - Type
  - namespace
  mode: native
  python_module: ''
  returns:
  - dynamic_type: Tensor
    name: result
    type: Tensor
  inplace: false
  is_factory_method: null
  abstract: false
  requires_tensor: false
  device_guard: true
  with_gil: false
  deprecated: false
- name: _batch_norm_impl_index
  operator_name: _batch_norm_impl_index
  overload_name: ''
  use_c10_dispatcher: unboxed_only
  category_override: ''
  matches_jit_signature: true
  schema_string: aten::_batch_norm_impl_index(Tensor input, Tensor? weight, Tensor? bias, Tensor? running_mean, Tensor? running_var, bool training, float momentum, float eps, bool cudnn_enabled) -> (Tensor, Tensor, Tensor, Tensor, int)
  method_prefix_derived: ''
  arguments:
  - annotation: null
    dynamic_type: Tensor
    is_nullable: false
    name: input
    type: const Tensor &
  - annotation: null
    dynamic_type: Tensor
    is_nullable: true
    name: weight
    type: const Tensor &
  - annotation: null
    dynamic_type: Tensor
    is_nullable: true
    name: bias
    type: const Tensor &
  - annotation: null
    dynamic_type: Tensor
    is_nullable: true
    name: running_mean
    type: const Tensor &
  - annotation: null
    dynamic_type: Tensor
    is_nullable: true
    name: running_var
    type: const Tensor &
  - annotation: null
    dynamic_type: bool
    is_nullable: false
    name: training
    type: bool
  - annotation: null
    dynamic_type: double
    is_nullable: false
    name: momentum
    type: double
  - annotation: null
    dynamic_type: double
    is_nullable: false
    name: eps
    type: double
  - annotation: null
    dynamic_type: bool
    is_nullable: false
    name: cudnn_enabled
    type: bool
  method_of:
  - Type
  - namespace
  mode: native
  python_module: ''
  returns:
  - dynamic_type: Tensor
    name: result0
    type: Tensor
  - dynamic_type: Tensor
    name: result1
    type: Tensor
  - dynamic_type: Tensor
    name: result2
    type: Tensor
  - dynamic_type: Tensor
    name: result3
    type: Tensor
  - dynamic_type: int64_t
    name: result4
    type: int64_t
  inplace: false
  is_factory_method: null
  abstract: false
  requires_tensor: false
  device_guard: true
  with_gil: false
  deprecated: false
- name: _batch_norm_impl_index_backward
  operator_name: _batch_norm_impl_index_backward
  overload_name: ''
  use_c10_dispatcher: unboxed_only
  category_override: ''
  matches_jit_signature: true
  schema_string: aten::_batch_norm_impl_index_backward(int impl_index, Tensor input, Tensor grad_output, Tensor? weight, Tensor? running_mean, Tensor? running_var, Tensor? save_mean, Tensor? save_var_transform, bool train, float eps, bool[3] output_mask, Tensor reservedSpace) -> (Tensor, Tensor, Tensor)
  method_prefix_derived: ''
  arguments:
  - annotation: null
    dynamic_type: int64_t
    is_nullable: false
    name: impl_index
    type: int64_t
  - annotation: null
    dynamic_type: Tensor
    is_nullable: false
    name: input
    type: const Tensor &
  - annotation: null
    dynamic_type: Tensor
    is_nullable: false
    name: grad_output
    type: const Tensor &
  - annotation: null
    dynamic_type: Tensor
    is_nullable: true
    name: weight
    type: const Tensor &
  - annotation: null
    dynamic_type: Tensor
    is_nullable: true
    name: running_mean
    type: const Tensor &
  - annotation: null
    dynamic_type: Tensor
    is_nullable: true
    name: running_var
    type: const Tensor &
  - annotation: null
    dynamic_type: Tensor
    is_nullable: true
    name: save_mean
    type: const Tensor &
  - annotation: null
    dynamic_type: Tensor
    is_nullable: true
    name: save_var_transform
    type: const Tensor &
  - annotation: null
    dynamic_type: bool
    is_nullable: false
    name: train
    type: bool
  - annotation: null
    dynamic_type: double
    is_nullable: false
    name: eps
    type: double
  - annotation: null
    dynamic_type: std::array<bool,3>
    is_nullable: false
    name: output_mask
    type: std::array<bool,3>
  - annotation: null
    dynamic_type: Tensor
    is_nullable: false
    name: reservedSpace
    type: const Tensor &
  method_of:
  - Type
  - namespace
  mode: native
  python_module: ''
  returns:
  - dynamic_type: Tensor
    name: result0
    type: Tensor
  - dynamic_type: Tensor
    name: result1
    type: Tensor
  - dynamic_type: Tensor
    name: result2
    type: Tensor
  inplace: false
  is_factory_method: null
  abstract: false
  requires_tensor: false
  device_guard: true
  with_gil: false
  deprecated: false
- name: bernoulli
  operator_name: bernoulli
  overload_name: ''
  use_c10_dispatcher: unboxed_only
  category_override: ''
  matches_jit_signature: true
  schema_string: aten::bernoulli(Tensor self, *, Generator? generator=None) -> Tensor
  method_prefix_derived: ''
  arguments:
  - annotation: null
    dynamic_type: Tensor
    is_nullable: false
    name: self
    type: const Tensor &
  - annotation: null
    default: nullptr
    dynamic_type: Generator *
    is_nullable: false
    kwarg_only: true
    name: generator
    type: Generator *
  method_of:
  - Type
  - Tensor
  - namespace
  mode: native
  python_module: ''
  returns:
  - dynamic_type: Tensor
    name: result
    type: Tensor
  inplace: false
  is_factory_method: null
  abstract: false
  requires_tensor: false
  device_guard: true
  with_gil: false
  deprecated: false
- name: bernoulli_out
  operator_name: bernoulli
  overload_name: out
  use_c10_dispatcher: unboxed_only
  category_override: ''
  matches_jit_signature: true
  schema_string: aten::bernoulli.out(Tensor self, *, Generator? generator=None, Tensor(a!) out) -> Tensor(a!)
  method_prefix_derived: ''
  arguments:
  - allocate: true
    annotation: a!
    dynamic_type: Tensor
    is_nullable: false
    kwarg_only: false
    name: out
    output: true
    type: Tensor &
  - annotation: null
    dynamic_type: Tensor
    is_nullable: false
    name: self
    type: const Tensor &
  - annotation: null
    default: nullptr
    dynamic_type: Generator *
    is_nullable: false
    kwarg_only: true
    name: generator
    type: Generator *
  method_of:
  - Type
  - namespace
  mode: native
  python_module: ''
  returns:
  - dynamic_type: Tensor
    name: out
    type: Tensor &
  inplace: false
  is_factory_method: null
  abstract: false
  requires_tensor: false
  device_guard: true
  with_gil: false
  deprecated: false
- name: bernoulli_
  operator_name: bernoulli_
  overload_name: Tensor
  use_c10_dispatcher: unboxed_only
  category_override: ''
  matches_jit_signature: true
  schema_string: aten::bernoulli_.Tensor(Tensor(a!) self, Tensor p, *, Generator? generator=None) -> Tensor(a!)
  method_prefix_derived: ''
  arguments:
  - annotation: a!
    dynamic_type: Tensor
    is_nullable: false
    name: self
    type: Tensor &
  - annotation: null
    dynamic_type: Tensor
    is_nullable: false
    name: p
    type: const Tensor &
  - annotation: null
    default: nullptr
    dynamic_type: Generator *
    is_nullable: false
    kwarg_only: true
    name: generator
    type: Generator *
  method_of:
  - Type
  - Tensor
  mode: native
  python_module: ''
  returns:
  - dynamic_type: Tensor
    name: self
    type: Tensor &
  inplace: true
  is_factory_method: null
  abstract: true
  requires_tensor: false
  device_guard: true
  with_gil: false
  deprecated: false
- name: bernoulli_
  operator_name: bernoulli_
  overload_name: float
  use_c10_dispatcher: unboxed_only
  category_override: ''
  matches_jit_signature: true
  schema_string: aten::bernoulli_.float(Tensor(a!) self, float p=0.5, *, Generator? generator=None) -> Tensor(a!)
  method_prefix_derived: ''
  arguments:
  - annotation: a!
    dynamic_type: Tensor
    is_nullable: false
    name: self
    type: Tensor &
  - annotation: null
    default: 0.5
    dynamic_type: double
    is_nullable: false
    name: p
    type: double
  - annotation: null
    default: nullptr
    dynamic_type: Generator *
    is_nullable: false
    kwarg_only: true
    name: generator
    type: Generator *
  method_of:
  - Type
  - Tensor
  mode: native
  python_module: ''
  returns:
  - dynamic_type: Tensor
    name: self
    type: Tensor &
  inplace: true
  is_factory_method: null
  abstract: true
  requires_tensor: false
  device_guard: true
  with_gil: false
  deprecated: false
- name: bernoulli
  operator_name: bernoulli
  overload_name: p
  use_c10_dispatcher: unboxed_only
  category_override: ''
  matches_jit_signature: true
  schema_string: aten::bernoulli.p(Tensor self, float p, *, Generator? generator=None) -> Tensor
  method_prefix_derived: ''
  arguments:
  - annotation: null
    dynamic_type: Tensor
    is_nullable: false
    name: self
    type: const Tensor &
  - annotation: null
    dynamic_type: double
    is_nullable: false
    name: p
    type: double
  - annotation: null
    default: nullptr
    dynamic_type: Generator *
    is_nullable: false
    kwarg_only: true
    name: generator
    type: Generator *
  method_of:
  - Type
  - Tensor
  - namespace
  mode: native
  python_module: ''
  returns:
  - dynamic_type: Tensor
    name: result
    type: Tensor
  inplace: false
  is_factory_method: null
  abstract: false
  requires_tensor: false
  device_guard: true
  with_gil: false
  deprecated: false
- name: bilinear
  operator_name: bilinear
  overload_name: ''
  use_c10_dispatcher: unboxed_only
  category_override: ''
  matches_jit_signature: true
  schema_string: aten::bilinear(Tensor input1, Tensor input2, Tensor weight, Tensor? bias) -> Tensor
  method_prefix_derived: ''
  arguments:
  - annotation: null
    dynamic_type: Tensor
    is_nullable: false
    name: input1
    type: const Tensor &
  - annotation: null
    dynamic_type: Tensor
    is_nullable: false
    name: input2
    type: const Tensor &
  - annotation: null
    dynamic_type: Tensor
    is_nullable: false
    name: weight
    type: const Tensor &
  - annotation: null
    dynamic_type: Tensor
    is_nullable: true
    name: bias
    type: const Tensor &
  method_of:
  - Type
  - namespace
  mode: native
  python_module: ''
  returns:
  - dynamic_type: Tensor
    name: result
    type: Tensor
  inplace: false
  is_factory_method: null
  abstract: false
  requires_tensor: false
  device_guard: true
  with_gil: false
  deprecated: false
- name: binary_cross_entropy_with_logits
  operator_name: binary_cross_entropy_with_logits
  overload_name: ''
  use_c10_dispatcher: unboxed_only
  category_override: ''
  matches_jit_signature: true
  schema_string: aten::binary_cross_entropy_with_logits(Tensor self, Tensor target, Tensor? weight=None, Tensor? pos_weight=None, int reduction=Mean) -> Tensor
  method_prefix_derived: ''
  arguments:
  - annotation: null
    dynamic_type: Tensor
    is_nullable: false
    name: self
    type: const Tensor &
  - annotation: null
    dynamic_type: Tensor
    is_nullable: false
    name: target
    type: const Tensor &
  - annotation: null
    default: '{}'
    dynamic_type: Tensor
    is_nullable: true
    name: weight
    type: const Tensor &
  - annotation: null
    default: '{}'
    dynamic_type: Tensor
    is_nullable: true
    name: pos_weight
    type: const Tensor &
  - annotation: null
    default: at::Reduction::Mean
    dynamic_type: int64_t
    is_nullable: false
    name: reduction
    type: int64_t
  method_of:
  - Type
  - namespace
  mode: native
  python_module: ''
  returns:
  - dynamic_type: Tensor
    name: result
    type: Tensor
  inplace: false
  is_factory_method: null
  abstract: false
  requires_tensor: false
  device_guard: true
  with_gil: false
  deprecated: false
- name: binary_cross_entropy_with_logits_backward
  operator_name: binary_cross_entropy_with_logits_backward
  overload_name: ''
  use_c10_dispatcher: unboxed_only
  category_override: ''
  matches_jit_signature: true
  schema_string: aten::binary_cross_entropy_with_logits_backward(Tensor grad_output, Tensor self, Tensor target, Tensor? weight=None, Tensor? pos_weight=None, int reduction=Mean) -> Tensor
  method_prefix_derived: ''
  arguments:
  - annotation: null
    dynamic_type: Tensor
    is_nullable: false
    name: grad_output
    type: const Tensor &
  - annotation: null
    dynamic_type: Tensor
    is_nullable: false
    name: self
    type: const Tensor &
  - annotation: null
    dynamic_type: Tensor
    is_nullable: false
    name: target
    type: const Tensor &
  - annotation: null
    default: '{}'
    dynamic_type: Tensor
    is_nullable: true
    name: weight
    type: const Tensor &
  - annotation: null
    default: '{}'
    dynamic_type: Tensor
    is_nullable: true
    name: pos_weight
    type: const Tensor &
  - annotation: null
    default: at::Reduction::Mean
    dynamic_type: int64_t
    is_nullable: false
    name: reduction
    type: int64_t
  method_of:
  - Type
  - namespace
  mode: native
  python_module: ''
  returns:
  - dynamic_type: Tensor
    name: result
    type: Tensor
  inplace: false
  is_factory_method: null
  abstract: false
  requires_tensor: false
  device_guard: true
  with_gil: false
  deprecated: false
- name: bincount
  operator_name: bincount
  overload_name: ''
  use_c10_dispatcher: unboxed_only
  category_override: ''
  matches_jit_signature: true
  schema_string: aten::bincount(Tensor self, Tensor? weights=None, int minlength=0) -> Tensor
  method_prefix_derived: ''
  arguments:
  - annotation: null
    dynamic_type: Tensor
    is_nullable: false
    name: self
    type: const Tensor &
  - annotation: null
    default: '{}'
    dynamic_type: Tensor
    is_nullable: true
    name: weights
    type: const Tensor &
  - annotation: null
    default: 0
    dynamic_type: int64_t
    is_nullable: false
    name: minlength
    type: int64_t
  method_of:
  - Type
  - Tensor
  - namespace
  mode: native
  python_module: ''
  returns:
  - dynamic_type: Tensor
    name: result
    type: Tensor
  inplace: false
  is_factory_method: null
  abstract: true
  requires_tensor: false
  device_guard: true
  with_gil: false
  deprecated: false
- name: bitwise_not
  operator_name: bitwise_not
  overload_name: ''
  use_c10_dispatcher: full
  category_override: ''
  matches_jit_signature: true
  schema_string: aten::bitwise_not(Tensor self) -> Tensor
  method_prefix_derived: ''
  arguments:
  - annotation: null
    dynamic_type: Tensor
    is_nullable: false
    name: self
    type: const Tensor &
  method_of:
  - Type
  - Tensor
  - namespace
  mode: native
  python_module: ''
  returns:
  - dynamic_type: Tensor
    name: result
    type: Tensor
  inplace: false
  is_factory_method: null
  abstract: false
  requires_tensor: false
  device_guard: true
  with_gil: false
  deprecated: false
- name: bitwise_not_
  operator_name: bitwise_not_
  overload_name: ''
  use_c10_dispatcher: unboxed_only
  category_override: ''
  matches_jit_signature: true
  schema_string: aten::bitwise_not_(Tensor(a!) self) -> Tensor(a!)
  method_prefix_derived: ''
  arguments:
  - annotation: a!
    dynamic_type: Tensor
    is_nullable: false
    name: self
    type: Tensor &
  method_of:
  - Type
  - Tensor
  mode: native
  python_module: ''
  returns:
  - dynamic_type: Tensor
    name: self
    type: Tensor &
  inplace: true
  is_factory_method: null
  abstract: false
  requires_tensor: false
  device_guard: true
  with_gil: false
  deprecated: false
- name: bitwise_not_out
  operator_name: bitwise_not
  overload_name: out
  use_c10_dispatcher: unboxed_only
  category_override: ''
  matches_jit_signature: true
  schema_string: aten::bitwise_not.out(Tensor self, *, Tensor(a!) out) -> Tensor(a!)
  method_prefix_derived: ''
  arguments:
  - allocate: true
    annotation: a!
    dynamic_type: Tensor
    is_nullable: false
    kwarg_only: false
    name: out
    output: true
    type: Tensor &
  - annotation: null
    dynamic_type: Tensor
    is_nullable: false
    name: self
    type: const Tensor &
  method_of:
  - Type
  - namespace
  mode: native
  python_module: ''
  returns:
  - dynamic_type: Tensor
    name: out
    type: Tensor &
  inplace: false
  is_factory_method: null
  abstract: true
  requires_tensor: false
  device_guard: true
  with_gil: false
  deprecated: false
- name: logical_not
  operator_name: logical_not
  overload_name: ''
  use_c10_dispatcher: unboxed_only
  category_override: ''
  matches_jit_signature: true
  schema_string: aten::logical_not(Tensor self) -> Tensor
  method_prefix_derived: ''
  arguments:
  - annotation: null
    dynamic_type: Tensor
    is_nullable: false
    name: self
    type: const Tensor &
  method_of:
  - Type
  - Tensor
  - namespace
  mode: native
  python_module: ''
  returns:
  - dynamic_type: Tensor
    name: result
    type: Tensor
  inplace: false
  is_factory_method: null
  abstract: false
  requires_tensor: false
  device_guard: true
  with_gil: false
  deprecated: false
- name: logical_not_
  operator_name: logical_not_
  overload_name: ''
  use_c10_dispatcher: unboxed_only
  category_override: ''
  matches_jit_signature: true
  schema_string: aten::logical_not_(Tensor(a!) self) -> Tensor(a!)
  method_prefix_derived: ''
  arguments:
  - annotation: a!
    dynamic_type: Tensor
    is_nullable: false
    name: self
    type: Tensor &
  method_of:
  - Type
  - Tensor
  mode: native
  python_module: ''
  returns:
  - dynamic_type: Tensor
    name: self
    type: Tensor &
  inplace: true
  is_factory_method: null
  abstract: false
  requires_tensor: false
  device_guard: true
  with_gil: false
  deprecated: false
- name: logical_not_out
  operator_name: logical_not
  overload_name: out
  use_c10_dispatcher: unboxed_only
  category_override: ''
  matches_jit_signature: true
  schema_string: aten::logical_not.out(Tensor self, *, Tensor(a!) out) -> Tensor(a!)
  method_prefix_derived: ''
  arguments:
  - allocate: true
    annotation: a!
    dynamic_type: Tensor
    is_nullable: false
    kwarg_only: false
    name: out
    output: true
    type: Tensor &
  - annotation: null
    dynamic_type: Tensor
    is_nullable: false
    name: self
    type: const Tensor &
  method_of:
  - Type
  - namespace
  mode: native
  python_module: ''
  returns:
  - dynamic_type: Tensor
    name: out
    type: Tensor &
  inplace: false
  is_factory_method: null
  abstract: true
  requires_tensor: false
  device_guard: true
  with_gil: false
  deprecated: false
- name: logical_xor
  operator_name: logical_xor
  overload_name: ''
  use_c10_dispatcher: unboxed_only
  category_override: ''
  matches_jit_signature: true
  schema_string: aten::logical_xor(Tensor self, Tensor other) -> Tensor
  method_prefix_derived: ''
  arguments:
  - annotation: null
    dynamic_type: Tensor
    is_nullable: false
    name: self
    type: const Tensor &
  - annotation: null
    dynamic_type: Tensor
    is_nullable: false
    name: other
    type: const Tensor &
  method_of:
  - Type
  - Tensor
  - namespace
  mode: native
  python_module: ''
  returns:
  - dynamic_type: Tensor
    name: result
    type: Tensor
  inplace: false
  is_factory_method: null
  abstract: false
  requires_tensor: false
  device_guard: true
  with_gil: false
  deprecated: false
- name: logical_xor_
  operator_name: logical_xor_
  overload_name: ''
  use_c10_dispatcher: unboxed_only
  category_override: ''
  matches_jit_signature: true
  schema_string: aten::logical_xor_(Tensor(a!) self, Tensor other) -> Tensor(a!)
  method_prefix_derived: ''
  arguments:
  - annotation: a!
    dynamic_type: Tensor
    is_nullable: false
    name: self
    type: Tensor &
  - annotation: null
    dynamic_type: Tensor
    is_nullable: false
    name: other
    type: const Tensor &
  method_of:
  - Type
  - Tensor
  mode: native
  python_module: ''
  returns:
  - dynamic_type: Tensor
    name: self
    type: Tensor &
  inplace: true
  is_factory_method: null
  abstract: false
  requires_tensor: false
  device_guard: true
  with_gil: false
  deprecated: false
- name: logical_xor_out
  operator_name: logical_xor
  overload_name: out
  use_c10_dispatcher: unboxed_only
  category_override: ''
  matches_jit_signature: true
  schema_string: aten::logical_xor.out(Tensor self, Tensor other, *, Tensor(a!) out) -> Tensor(a!)
  method_prefix_derived: ''
  arguments:
  - allocate: true
    annotation: a!
    dynamic_type: Tensor
    is_nullable: false
    kwarg_only: false
    name: out
    output: true
    type: Tensor &
  - annotation: null
    dynamic_type: Tensor
    is_nullable: false
    name: self
    type: const Tensor &
  - annotation: null
    dynamic_type: Tensor
    is_nullable: false
    name: other
    type: const Tensor &
  method_of:
  - Type
  - namespace
  mode: native
  python_module: ''
  returns:
  - dynamic_type: Tensor
    name: out
    type: Tensor &
  inplace: false
  is_factory_method: null
  abstract: true
  requires_tensor: false
  device_guard: true
  with_gil: false
  deprecated: false
- name: blackman_window
  operator_name: blackman_window
  overload_name: ''
  use_c10_dispatcher: unboxed_only
  category_override: ''
  matches_jit_signature: true
  schema_string: aten::blackman_window(int window_length, *, ScalarType? dtype=None, Layout? layout=None, Device? device=None, bool? pin_memory=None) -> Tensor
  method_prefix_derived: ''
  arguments:
  - annotation: null
    dynamic_type: int64_t
    is_nullable: false
    name: window_length
    type: int64_t
  - annotation: null
    default: '{}'
    dynamic_type: TensorOptions
    is_nullable: false
    kwarg_only: true
    name: options
    type: const TensorOptions &
  method_of:
  - Type
  - namespace
  mode: native
  python_module: ''
  returns:
  - dynamic_type: Tensor
    name: result
    type: Tensor
  inplace: false
  is_factory_method: true
  abstract: false
  requires_tensor: false
  device_guard: true
  with_gil: false
  deprecated: false
- name: blackman_window
  operator_name: blackman_window
  overload_name: periodic
  use_c10_dispatcher: unboxed_only
  category_override: ''
  matches_jit_signature: true
  schema_string: aten::blackman_window.periodic(int window_length, bool periodic, *, ScalarType? dtype=None, Layout? layout=None, Device? device=None, bool? pin_memory=None) -> Tensor
  method_prefix_derived: ''
  arguments:
  - annotation: null
    dynamic_type: int64_t
    is_nullable: false
    name: window_length
    type: int64_t
  - annotation: null
    dynamic_type: bool
    is_nullable: false
    name: periodic
    type: bool
  - annotation: null
    default: '{}'
    dynamic_type: TensorOptions
    is_nullable: false
    kwarg_only: true
    name: options
    type: const TensorOptions &
  method_of:
  - Type
  - namespace
  mode: native
  python_module: ''
  returns:
  - dynamic_type: Tensor
    name: result
    type: Tensor
  inplace: false
  is_factory_method: true
  abstract: false
  requires_tensor: false
  device_guard: true
  with_gil: false
  deprecated: false
- name: bmm
  operator_name: bmm
  overload_name: ''
  use_c10_dispatcher: full
  category_override: ''
  matches_jit_signature: true
  schema_string: aten::bmm(Tensor self, Tensor mat2) -> Tensor
  method_prefix_derived: ''
  arguments:
  - annotation: null
    dynamic_type: Tensor
    is_nullable: false
    name: self
    type: const Tensor &
  - annotation: null
    dynamic_type: Tensor
    is_nullable: false
    name: mat2
    type: const Tensor &
  method_of:
  - Type
  - Tensor
  - namespace
  mode: native
  python_module: ''
  returns:
  - dynamic_type: Tensor
    name: result
    type: Tensor
  inplace: false
  is_factory_method: null
  abstract: true
  requires_tensor: false
  device_guard: true
  with_gil: false
  deprecated: false
- name: bmm_out
  operator_name: bmm
  overload_name: out
  use_c10_dispatcher: unboxed_only
  category_override: ''
  matches_jit_signature: true
  schema_string: aten::bmm.out(Tensor self, Tensor mat2, *, Tensor(a!) out) -> Tensor(a!)
  method_prefix_derived: ''
  arguments:
  - allocate: true
    annotation: a!
    dynamic_type: Tensor
    is_nullable: false
    kwarg_only: false
    name: out
    output: true
    type: Tensor &
  - annotation: null
    dynamic_type: Tensor
    is_nullable: false
    name: self
    type: const Tensor &
  - annotation: null
    dynamic_type: Tensor
    is_nullable: false
    name: mat2
    type: const Tensor &
  method_of:
  - Type
  - namespace
  mode: native
  python_module: ''
  returns:
  - dynamic_type: Tensor
    name: out
    type: Tensor &
  inplace: false
  is_factory_method: null
  abstract: true
  requires_tensor: false
  device_guard: true
  with_gil: false
  deprecated: false
- name: broadcast_tensors
  operator_name: broadcast_tensors
  overload_name: ''
  use_c10_dispatcher: unboxed_only
  category_override: ''
  matches_jit_signature: true
  schema_string: aten::broadcast_tensors(Tensor[] tensors) -> Tensor[]
  method_prefix_derived: ''
  arguments:
  - annotation: null
    dynamic_type: TensorList
    is_nullable: false
    name: tensors
    type: TensorList
  method_of:
  - Type
  - namespace
  mode: native
  python_module: ''
  returns:
  - dynamic_type: TensorList
    name: result
    type: std::vector<Tensor>
  inplace: false
  is_factory_method: null
  abstract: false
  requires_tensor: false
  device_guard: false
  with_gil: false
  deprecated: false
- name: cat
  operator_name: cat
  overload_name: ''
  use_c10_dispatcher: unboxed_only
  category_override: ''
  matches_jit_signature: true
  schema_string: aten::cat(Tensor[] tensors, int dim=0) -> Tensor
  method_prefix_derived: ''
  arguments:
  - annotation: null
    dynamic_type: TensorList
    is_nullable: false
    name: tensors
    type: TensorList
  - annotation: null
    default: 0
    dynamic_type: int64_t
    is_nullable: false
    name: dim
    type: int64_t
  method_of:
  - Type
  - namespace
  mode: native
  python_module: ''
  returns:
  - dynamic_type: Tensor
    name: result
    type: Tensor
  inplace: false
  is_factory_method: null
  abstract: false
  requires_tensor: false
  device_guard: true
  with_gil: false
  deprecated: false
- name: cat_out
  operator_name: cat
  overload_name: out
  use_c10_dispatcher: unboxed_only
  category_override: ''
  matches_jit_signature: true
  schema_string: aten::cat.out(Tensor[] tensors, int dim=0, *, Tensor(a!) out) -> Tensor(a!)
  method_prefix_derived: ''
  arguments:
  - allocate: true
    annotation: a!
    dynamic_type: Tensor
    is_nullable: false
    kwarg_only: false
    name: out
    output: true
    type: Tensor &
  - annotation: null
    dynamic_type: TensorList
    is_nullable: false
    name: tensors
    type: TensorList
  - annotation: null
    default: 0
    dynamic_type: int64_t
    is_nullable: false
    name: dim
    type: int64_t
  method_of:
  - Type
  - namespace
  mode: native
  python_module: ''
  returns:
  - dynamic_type: Tensor
    name: out
    type: Tensor &
  inplace: false
  is_factory_method: null
  abstract: false
  requires_tensor: false
  device_guard: true
  with_gil: false
  deprecated: false
- name: cat
  operator_name: cat
  overload_name: names
  use_c10_dispatcher: unboxed_only
  category_override: ''
  matches_jit_signature: true
  schema_string: aten::cat.names(Tensor[] tensors, Dimname dim) -> Tensor
  method_prefix_derived: ''
  arguments:
  - annotation: null
    dynamic_type: TensorList
    is_nullable: false
    name: tensors
    type: TensorList
  - annotation: null
    dynamic_type: Dimname
    is_nullable: false
    name: dim
    type: Dimname
  method_of:
  - Type
  - namespace
  mode: native
  python_module: ''
  returns:
  - dynamic_type: Tensor
    name: result
    type: Tensor
  inplace: false
  is_factory_method: null
  abstract: false
  requires_tensor: false
  device_guard: true
  with_gil: false
  deprecated: false
- name: cat_out
  operator_name: cat
  overload_name: names_out
  use_c10_dispatcher: unboxed_only
  category_override: ''
  matches_jit_signature: true
  schema_string: aten::cat.names_out(Tensor[] tensors, Dimname dim, *, Tensor(a!) out) -> Tensor(a!)
  method_prefix_derived: ''
  arguments:
  - allocate: true
    annotation: a!
    dynamic_type: Tensor
    is_nullable: false
    kwarg_only: false
    name: out
    output: true
    type: Tensor &
  - annotation: null
    dynamic_type: TensorList
    is_nullable: false
    name: tensors
    type: TensorList
  - annotation: null
    dynamic_type: Dimname
    is_nullable: false
    name: dim
    type: Dimname
  method_of:
  - Type
  - namespace
  mode: native
  python_module: ''
  returns:
  - dynamic_type: Tensor
    name: out
    type: Tensor &
  inplace: false
  is_factory_method: null
  abstract: false
  requires_tensor: false
  device_guard: true
  with_gil: false
  deprecated: false
- name: ceil
  operator_name: ceil
  overload_name: ''
  use_c10_dispatcher: full
  category_override: ''
  matches_jit_signature: true
  schema_string: aten::ceil(Tensor self) -> Tensor
  method_prefix_derived: ''
  arguments:
  - annotation: null
    dynamic_type: Tensor
    is_nullable: false
    name: self
    type: const Tensor &
  method_of:
  - Type
  - Tensor
  - namespace
  mode: native
  python_module: ''
  returns:
  - dynamic_type: Tensor
    name: result
    type: Tensor
  inplace: false
  is_factory_method: null
  abstract: false
  requires_tensor: false
  device_guard: true
  with_gil: false
  deprecated: false
- name: ceil_
  operator_name: ceil_
  overload_name: ''
  use_c10_dispatcher: unboxed_only
  category_override: ''
  matches_jit_signature: true
  schema_string: aten::ceil_(Tensor(a!) self) -> Tensor(a!)
  method_prefix_derived: ''
  arguments:
  - annotation: a!
    dynamic_type: Tensor
    is_nullable: false
    name: self
    type: Tensor &
  method_of:
  - Type
  - Tensor
  - namespace
  mode: native
  python_module: ''
  returns:
  - dynamic_type: Tensor
    name: self
    type: Tensor &
  inplace: true
  is_factory_method: null
  abstract: false
  requires_tensor: false
  device_guard: true
  with_gil: false
  deprecated: false
- name: ceil_out
  operator_name: ceil
  overload_name: out
  use_c10_dispatcher: unboxed_only
  category_override: ''
  matches_jit_signature: true
  schema_string: aten::ceil.out(Tensor self, *, Tensor(a!) out) -> Tensor(a!)
  method_prefix_derived: ''
  arguments:
  - allocate: true
    annotation: a!
    dynamic_type: Tensor
    is_nullable: false
    kwarg_only: false
    name: out
    output: true
    type: Tensor &
  - annotation: null
    dynamic_type: Tensor
    is_nullable: false
    name: self
    type: const Tensor &
  method_of:
  - Type
  - namespace
  mode: native
  python_module: ''
  returns:
  - dynamic_type: Tensor
    name: out
    type: Tensor &
  inplace: false
  is_factory_method: null
  abstract: true
  requires_tensor: false
  device_guard: true
  with_gil: false
  deprecated: false
- name: chain_matmul
  operator_name: chain_matmul
  overload_name: ''
  use_c10_dispatcher: unboxed_only
  category_override: ''
  matches_jit_signature: true
  schema_string: aten::chain_matmul(Tensor[] matrices) -> Tensor
  method_prefix_derived: ''
  arguments:
  - annotation: null
    dynamic_type: TensorList
    is_nullable: false
    name: matrices
    type: TensorList
  method_of:
  - Type
  - namespace
  mode: native
  python_module: ''
  returns:
  - dynamic_type: Tensor
    name: result
    type: Tensor
  inplace: false
  is_factory_method: null
  abstract: false
  requires_tensor: false
  device_guard: true
  with_gil: false
  deprecated: false
- name: chunk
  operator_name: chunk
  overload_name: ''
  use_c10_dispatcher: unboxed_only
  category_override: ''
  matches_jit_signature: true
  schema_string: aten::chunk(Tensor(a) self, int chunks, int dim=0) -> Tensor(a)[]
  method_prefix_derived: ''
  arguments:
  - annotation: a
    dynamic_type: Tensor
    is_nullable: false
    name: self
    type: const Tensor &
  - annotation: null
    dynamic_type: int64_t
    is_nullable: false
    name: chunks
    type: int64_t
  - annotation: null
    default: 0
    dynamic_type: int64_t
    is_nullable: false
    name: dim
    type: int64_t
  method_of:
  - Type
  - Tensor
  - namespace
  mode: native
  python_module: ''
  returns:
  - dynamic_type: TensorList
    name: result
    type: std::vector<Tensor>
  inplace: false
  is_factory_method: null
  abstract: false
  requires_tensor: false
  device_guard: false
  with_gil: false
  deprecated: false
- name: clamp
  operator_name: clamp
  overload_name: ''
  use_c10_dispatcher: full
  category_override: ''
  matches_jit_signature: true
  schema_string: aten::clamp(Tensor self, Scalar? min=None, Scalar? max=None) -> Tensor
  method_prefix_derived: ''
  arguments:
  - annotation: null
    dynamic_type: Tensor
    is_nullable: false
    name: self
    type: const Tensor &
  - annotation: null
    default: c10::nullopt
    dynamic_type: Scalar
    is_nullable: true
    name: min
    type: c10::optional<Scalar>
  - annotation: null
    default: c10::nullopt
    dynamic_type: Scalar
    is_nullable: true
    name: max
    type: c10::optional<Scalar>
  method_of:
  - Type
  - Tensor
  - namespace
  mode: native
  python_module: ''
  returns:
  - dynamic_type: Tensor
    name: result
    type: Tensor
  inplace: false
  is_factory_method: null
  abstract: false
  requires_tensor: false
  device_guard: true
  with_gil: false
  deprecated: false
- name: clamp_
  operator_name: clamp_
  overload_name: ''
  use_c10_dispatcher: unboxed_only
  category_override: ''
  matches_jit_signature: true
  schema_string: aten::clamp_(Tensor(a!) self, Scalar? min=None, Scalar? max=None) -> Tensor(a!)
  method_prefix_derived: ''
  arguments:
  - annotation: a!
    dynamic_type: Tensor
    is_nullable: false
    name: self
    type: Tensor &
  - annotation: null
    default: c10::nullopt
    dynamic_type: Scalar
    is_nullable: true
    name: min
    type: c10::optional<Scalar>
  - annotation: null
    default: c10::nullopt
    dynamic_type: Scalar
    is_nullable: true
    name: max
    type: c10::optional<Scalar>
  method_of:
  - Type
  - Tensor
  - namespace
  mode: native
  python_module: ''
  returns:
  - dynamic_type: Tensor
    name: self
    type: Tensor &
  inplace: true
  is_factory_method: null
  abstract: true
  requires_tensor: false
  device_guard: true
  with_gil: false
  deprecated: false
- name: clamp_out
  operator_name: clamp
  overload_name: out
  use_c10_dispatcher: unboxed_only
  category_override: ''
  matches_jit_signature: true
  schema_string: aten::clamp.out(Tensor self, Scalar? min=None, Scalar? max=None, *, Tensor(a!) out) -> Tensor(a!)
  method_prefix_derived: ''
  arguments:
  - allocate: true
    annotation: a!
    dynamic_type: Tensor
    is_nullable: false
    kwarg_only: false
    name: out
    output: true
    type: Tensor &
  - annotation: null
    dynamic_type: Tensor
    is_nullable: false
    name: self
    type: const Tensor &
  - annotation: null
    default: c10::nullopt
    dynamic_type: Scalar
    is_nullable: true
    name: min
    type: c10::optional<Scalar>
  - annotation: null
    default: c10::nullopt
    dynamic_type: Scalar
    is_nullable: true
    name: max
    type: c10::optional<Scalar>
  method_of:
  - Type
  - namespace
  mode: native
  python_module: ''
  returns:
  - dynamic_type: Tensor
    name: out
    type: Tensor &
  inplace: false
  is_factory_method: null
  abstract: true
  requires_tensor: false
  device_guard: true
  with_gil: false
  deprecated: false
- name: clamp_max
  operator_name: clamp_max
  overload_name: ''
  use_c10_dispatcher: full
  category_override: ''
  matches_jit_signature: true
  schema_string: aten::clamp_max(Tensor self, Scalar max) -> Tensor
  method_prefix_derived: ''
  arguments:
  - annotation: null
    dynamic_type: Tensor
    is_nullable: false
    name: self
    type: const Tensor &
  - annotation: null
    dynamic_type: Scalar
    is_nullable: false
    name: max
    type: Scalar
  method_of:
  - Type
  - Tensor
  - namespace
  mode: native
  python_module: ''
  returns:
  - dynamic_type: Tensor
    name: result
    type: Tensor
  inplace: false
  is_factory_method: null
  abstract: false
  requires_tensor: false
  device_guard: true
  with_gil: false
  deprecated: false
- name: clamp_max_
  operator_name: clamp_max_
  overload_name: ''
  use_c10_dispatcher: unboxed_only
  category_override: ''
  matches_jit_signature: true
  schema_string: aten::clamp_max_(Tensor(a!) self, Scalar max) -> Tensor(a!)
  method_prefix_derived: ''
  arguments:
  - annotation: a!
    dynamic_type: Tensor
    is_nullable: false
    name: self
    type: Tensor &
  - annotation: null
    dynamic_type: Scalar
    is_nullable: false
    name: max
    type: Scalar
  method_of:
  - Type
  - Tensor
  - namespace
  mode: native
  python_module: ''
  returns:
  - dynamic_type: Tensor
    name: self
    type: Tensor &
  inplace: true
  is_factory_method: null
  abstract: true
  requires_tensor: false
  device_guard: true
  with_gil: false
  deprecated: false
- name: clamp_max_out
  operator_name: clamp_max
  overload_name: out
  use_c10_dispatcher: unboxed_only
  category_override: ''
  matches_jit_signature: true
  schema_string: aten::clamp_max.out(Tensor self, Scalar max, *, Tensor(a!) out) -> Tensor(a!)
  method_prefix_derived: ''
  arguments:
  - allocate: true
    annotation: a!
    dynamic_type: Tensor
    is_nullable: false
    kwarg_only: false
    name: out
    output: true
    type: Tensor &
  - annotation: null
    dynamic_type: Tensor
    is_nullable: false
    name: self
    type: const Tensor &
  - annotation: null
    dynamic_type: Scalar
    is_nullable: false
    name: max
    type: Scalar
  method_of:
  - Type
  - namespace
  mode: native
  python_module: ''
  returns:
  - dynamic_type: Tensor
    name: out
    type: Tensor &
  inplace: false
  is_factory_method: null
  abstract: true
  requires_tensor: false
  device_guard: true
  with_gil: false
  deprecated: false
- name: clamp_min
  operator_name: clamp_min
  overload_name: ''
  use_c10_dispatcher: full
  category_override: ''
  matches_jit_signature: true
  schema_string: aten::clamp_min(Tensor self, Scalar min) -> Tensor
  method_prefix_derived: ''
  arguments:
  - annotation: null
    dynamic_type: Tensor
    is_nullable: false
    name: self
    type: const Tensor &
  - annotation: null
    dynamic_type: Scalar
    is_nullable: false
    name: min
    type: Scalar
  method_of:
  - Type
  - Tensor
  - namespace
  mode: native
  python_module: ''
  returns:
  - dynamic_type: Tensor
    name: result
    type: Tensor
  inplace: false
  is_factory_method: null
  abstract: false
  requires_tensor: false
  device_guard: true
  with_gil: false
  deprecated: false
- name: clamp_min_
  operator_name: clamp_min_
  overload_name: ''
  use_c10_dispatcher: unboxed_only
  category_override: ''
  matches_jit_signature: true
  schema_string: aten::clamp_min_(Tensor(a!) self, Scalar min) -> Tensor(a!)
  method_prefix_derived: ''
  arguments:
  - annotation: a!
    dynamic_type: Tensor
    is_nullable: false
    name: self
    type: Tensor &
  - annotation: null
    dynamic_type: Scalar
    is_nullable: false
    name: min
    type: Scalar
  method_of:
  - Type
  - Tensor
  - namespace
  mode: native
  python_module: ''
  returns:
  - dynamic_type: Tensor
    name: self
    type: Tensor &
  inplace: true
  is_factory_method: null
  abstract: true
  requires_tensor: false
  device_guard: true
  with_gil: false
  deprecated: false
- name: clamp_min_out
  operator_name: clamp_min
  overload_name: out
  use_c10_dispatcher: unboxed_only
  category_override: ''
  matches_jit_signature: true
  schema_string: aten::clamp_min.out(Tensor self, Scalar min, *, Tensor(a!) out) -> Tensor(a!)
  method_prefix_derived: ''
  arguments:
  - allocate: true
    annotation: a!
    dynamic_type: Tensor
    is_nullable: false
    kwarg_only: false
    name: out
    output: true
    type: Tensor &
  - annotation: null
    dynamic_type: Tensor
    is_nullable: false
    name: self
    type: const Tensor &
  - annotation: null
    dynamic_type: Scalar
    is_nullable: false
    name: min
    type: Scalar
  method_of:
  - Type
  - namespace
  mode: native
  python_module: ''
  returns:
  - dynamic_type: Tensor
    name: out
    type: Tensor &
  inplace: false
  is_factory_method: null
  abstract: true
  requires_tensor: false
  device_guard: true
  with_gil: false
  deprecated: false
- name: cudnn_is_acceptable
  operator_name: cudnn_is_acceptable
  overload_name: ''
  use_c10_dispatcher: full
  category_override: ''
  matches_jit_signature: true
  schema_string: aten::cudnn_is_acceptable(Tensor self) -> bool
  method_prefix_derived: ''
  arguments:
  - annotation: null
    dynamic_type: Tensor
    is_nullable: false
    name: self
    type: const Tensor &
  method_of:
  - Type
  - namespace
  mode: native
  python_module: ''
  returns:
  - dynamic_type: bool
    name: result
    type: bool
  inplace: false
  is_factory_method: null
  abstract: false
  requires_tensor: false
  device_guard: false
  with_gil: false
  deprecated: false
- name: constant_pad_nd
  operator_name: constant_pad_nd
  overload_name: ''
  use_c10_dispatcher: unboxed_only
  category_override: ''
  matches_jit_signature: true
  schema_string: aten::constant_pad_nd(Tensor self, int[] pad, Scalar value=0) -> Tensor
  method_prefix_derived: ''
  arguments:
  - annotation: null
    dynamic_type: Tensor
    is_nullable: false
    name: self
    type: const Tensor &
  - annotation: null
    dynamic_type: IntArrayRef
    is_nullable: false
    name: pad
    type: IntArrayRef
  - annotation: null
    default: 0
    dynamic_type: Scalar
    is_nullable: false
    name: value
    type: Scalar
  method_of:
  - Type
  - namespace
  mode: native
  python_module: ''
  returns:
  - dynamic_type: Tensor
    name: result
    type: Tensor
  inplace: false
  is_factory_method: null
  abstract: false
  requires_tensor: false
  device_guard: true
  with_gil: false
  deprecated: false
- name: contiguous
  operator_name: contiguous
  overload_name: ''
  use_c10_dispatcher: unboxed_only
  category_override: ''
  matches_jit_signature: true
  schema_string: aten::contiguous(Tensor self, *, MemoryFormat memory_format=contiguous_format) -> Tensor
  method_prefix_derived: ''
  arguments:
  - annotation: null
    dynamic_type: Tensor
    is_nullable: false
    name: self
    type: const Tensor &
  - annotation: null
    default: MemoryFormat::Contiguous
    dynamic_type: MemoryFormat
    is_nullable: false
    kwarg_only: true
    name: memory_format
    type: MemoryFormat
  method_of:
  - Type
  - Tensor
  mode: native
  python_module: ''
  returns:
  - dynamic_type: Tensor
    name: result
    type: Tensor
  inplace: false
  is_factory_method: null
  abstract: false
  requires_tensor: false
  device_guard: true
  with_gil: false
  deprecated: false
- name: convolution
  operator_name: convolution
  overload_name: ''
  use_c10_dispatcher: unboxed_only
  category_override: ''
  matches_jit_signature: true
  schema_string: aten::convolution(Tensor input, Tensor weight, Tensor? bias, int[] stride, int[] padding, int[] dilation, bool transposed, int[] output_padding, int groups) -> Tensor
  method_prefix_derived: ''
  arguments:
  - annotation: null
    dynamic_type: Tensor
    is_nullable: false
    name: input
    type: const Tensor &
  - annotation: null
    dynamic_type: Tensor
    is_nullable: false
    name: weight
    type: const Tensor &
  - annotation: null
    dynamic_type: Tensor
    is_nullable: true
    name: bias
    type: const Tensor &
  - annotation: null
    dynamic_type: IntArrayRef
    is_nullable: false
    name: stride
    type: IntArrayRef
  - annotation: null
    dynamic_type: IntArrayRef
    is_nullable: false
    name: padding
    type: IntArrayRef
  - annotation: null
    dynamic_type: IntArrayRef
    is_nullable: false
    name: dilation
    type: IntArrayRef
  - annotation: null
    dynamic_type: bool
    is_nullable: false
    name: transposed
    type: bool
  - annotation: null
    dynamic_type: IntArrayRef
    is_nullable: false
    name: output_padding
    type: IntArrayRef
  - annotation: null
    dynamic_type: int64_t
    is_nullable: false
    name: groups
    type: int64_t
  method_of:
  - Type
  - namespace
  mode: native
  python_module: ''
  returns:
  - dynamic_type: Tensor
    name: result
    type: Tensor
  inplace: false
  is_factory_method: null
  abstract: false
  requires_tensor: false
  device_guard: true
  with_gil: false
  deprecated: false
- name: convolution_overrideable
  operator_name: convolution_overrideable
  overload_name: ''
  use_c10_dispatcher: unboxed_only
  category_override: ''
  matches_jit_signature: true
  schema_string: aten::convolution_overrideable(Tensor input, Tensor weight, Tensor? bias, int[] stride, int[] padding, int[] dilation, bool transposed, int[] output_padding, int groups) -> Tensor
  method_prefix_derived: ''
  arguments:
  - annotation: null
    dynamic_type: Tensor
    is_nullable: false
    name: input
    type: const Tensor &
  - annotation: null
    dynamic_type: Tensor
    is_nullable: false
    name: weight
    type: const Tensor &
  - annotation: null
    dynamic_type: Tensor
    is_nullable: true
    name: bias
    type: const Tensor &
  - annotation: null
    dynamic_type: IntArrayRef
    is_nullable: false
    name: stride
    type: IntArrayRef
  - annotation: null
    dynamic_type: IntArrayRef
    is_nullable: false
    name: padding
    type: IntArrayRef
  - annotation: null
    dynamic_type: IntArrayRef
    is_nullable: false
    name: dilation
    type: IntArrayRef
  - annotation: null
    dynamic_type: bool
    is_nullable: false
    name: transposed
    type: bool
  - annotation: null
    dynamic_type: IntArrayRef
    is_nullable: false
    name: output_padding
    type: IntArrayRef
  - annotation: null
    dynamic_type: int64_t
    is_nullable: false
    name: groups
    type: int64_t
  method_of:
  - Type
  - namespace
  mode: native
  python_module: ''
  returns:
  - dynamic_type: Tensor
    name: result
    type: Tensor
  inplace: false
  is_factory_method: null
  abstract: false
  requires_tensor: false
  device_guard: true
  with_gil: false
  deprecated: false
- name: convolution_backward_overrideable
  operator_name: convolution_backward_overrideable
  overload_name: ''
  use_c10_dispatcher: unboxed_only
  category_override: ''
  matches_jit_signature: true
  schema_string: aten::convolution_backward_overrideable(Tensor grad_output, Tensor input, Tensor weight, int[] stride, int[] padding, int[] dilation, bool transposed, int[] output_padding, int groups, bool[3] output_mask) -> (Tensor grad_input, Tensor grad_weight, Tensor grad_bias)
  method_prefix_derived: ''
  arguments:
  - annotation: null
    dynamic_type: Tensor
    is_nullable: false
    name: grad_output
    type: const Tensor &
  - annotation: null
    dynamic_type: Tensor
    is_nullable: false
    name: input
    type: const Tensor &
  - annotation: null
    dynamic_type: Tensor
    is_nullable: false
    name: weight
    type: const Tensor &
  - annotation: null
    dynamic_type: IntArrayRef
    is_nullable: false
    name: stride
    type: IntArrayRef
  - annotation: null
    dynamic_type: IntArrayRef
    is_nullable: false
    name: padding
    type: IntArrayRef
  - annotation: null
    dynamic_type: IntArrayRef
    is_nullable: false
    name: dilation
    type: IntArrayRef
  - annotation: null
    dynamic_type: bool
    is_nullable: false
    name: transposed
    type: bool
  - annotation: null
    dynamic_type: IntArrayRef
    is_nullable: false
    name: output_padding
    type: IntArrayRef
  - annotation: null
    dynamic_type: int64_t
    is_nullable: false
    name: groups
    type: int64_t
  - annotation: null
    dynamic_type: std::array<bool,3>
    is_nullable: false
    name: output_mask
    type: std::array<bool,3>
  method_of:
  - Type
  - namespace
  mode: native
  python_module: ''
  returns:
  - dynamic_type: Tensor
    field_name: grad_input
    name: grad_input
    type: Tensor
  - dynamic_type: Tensor
    field_name: grad_weight
    name: grad_weight
    type: Tensor
  - dynamic_type: Tensor
    field_name: grad_bias
    name: grad_bias
    type: Tensor
  inplace: false
  is_factory_method: null
  abstract: false
  requires_tensor: false
  device_guard: true
  with_gil: false
  deprecated: false
- name: _convolution
  operator_name: _convolution
  overload_name: ''
  use_c10_dispatcher: unboxed_only
  category_override: ''
  matches_jit_signature: true
  schema_string: aten::_convolution(Tensor input, Tensor weight, Tensor? bias, int[] stride, int[] padding, int[] dilation, bool transposed, int[] output_padding, int groups, bool benchmark, bool deterministic, bool cudnn_enabled) -> Tensor
  method_prefix_derived: ''
  arguments:
  - annotation: null
    dynamic_type: Tensor
    is_nullable: false
    name: input
    type: const Tensor &
  - annotation: null
    dynamic_type: Tensor
    is_nullable: false
    name: weight
    type: const Tensor &
  - annotation: null
    dynamic_type: Tensor
    is_nullable: true
    name: bias
    type: const Tensor &
  - annotation: null
    dynamic_type: IntArrayRef
    is_nullable: false
    name: stride
    type: IntArrayRef
  - annotation: null
    dynamic_type: IntArrayRef
    is_nullable: false
    name: padding
    type: IntArrayRef
  - annotation: null
    dynamic_type: IntArrayRef
    is_nullable: false
    name: dilation
    type: IntArrayRef
  - annotation: null
    dynamic_type: bool
    is_nullable: false
    name: transposed
    type: bool
  - annotation: null
    dynamic_type: IntArrayRef
    is_nullable: false
    name: output_padding
    type: IntArrayRef
  - annotation: null
    dynamic_type: int64_t
    is_nullable: false
    name: groups
    type: int64_t
  - annotation: null
    dynamic_type: bool
    is_nullable: false
    name: benchmark
    type: bool
  - annotation: null
    dynamic_type: bool
    is_nullable: false
    name: deterministic
    type: bool
  - annotation: null
    dynamic_type: bool
    is_nullable: false
    name: cudnn_enabled
    type: bool
  method_of:
  - Type
  - namespace
  mode: native
  python_module: ''
  returns:
  - dynamic_type: Tensor
    name: result
    type: Tensor
  inplace: false
  is_factory_method: null
  abstract: false
  requires_tensor: false
  device_guard: true
  with_gil: false
  deprecated: false
- name: _convolution_nogroup
  operator_name: _convolution_nogroup
  overload_name: ''
  use_c10_dispatcher: unboxed_only
  category_override: ''
  matches_jit_signature: true
  schema_string: aten::_convolution_nogroup(Tensor input, Tensor weight, Tensor? bias, int[] stride, int[] padding, int[] dilation, bool transposed, int[] output_padding) -> Tensor
  method_prefix_derived: ''
  arguments:
  - annotation: null
    dynamic_type: Tensor
    is_nullable: false
    name: input
    type: const Tensor &
  - annotation: null
    dynamic_type: Tensor
    is_nullable: false
    name: weight
    type: const Tensor &
  - annotation: null
    dynamic_type: Tensor
    is_nullable: true
    name: bias
    type: const Tensor &
  - annotation: null
    dynamic_type: IntArrayRef
    is_nullable: false
    name: stride
    type: IntArrayRef
  - annotation: null
    dynamic_type: IntArrayRef
    is_nullable: false
    name: padding
    type: IntArrayRef
  - annotation: null
    dynamic_type: IntArrayRef
    is_nullable: false
    name: dilation
    type: IntArrayRef
  - annotation: null
    dynamic_type: bool
    is_nullable: false
    name: transposed
    type: bool
  - annotation: null
    dynamic_type: IntArrayRef
    is_nullable: false
    name: output_padding
    type: IntArrayRef
  method_of:
  - Type
  - namespace
  mode: native
  python_module: ''
  returns:
  - dynamic_type: Tensor
    name: result
    type: Tensor
  inplace: false
  is_factory_method: null
  abstract: false
  requires_tensor: false
  device_guard: true
  with_gil: false
  deprecated: false
- name: _convolution_double_backward
  operator_name: _convolution_double_backward
  overload_name: ''
  use_c10_dispatcher: unboxed_only
  category_override: ''
  matches_jit_signature: true
  schema_string: aten::_convolution_double_backward(Tensor? ggI, Tensor? ggW, Tensor? ggb, Tensor gO, Tensor weight, Tensor self, int[] stride, int[] padding, int[] dilation, bool transposed, int[] output_padding, int groups, bool benchmark, bool deterministic, bool cudnn_enabled, bool[3] output_mask) -> (Tensor, Tensor, Tensor)
  method_prefix_derived: ''
  arguments:
  - annotation: null
    dynamic_type: Tensor
    is_nullable: true
    name: ggI
    type: const Tensor &
  - annotation: null
    dynamic_type: Tensor
    is_nullable: true
    name: ggW
    type: const Tensor &
  - annotation: null
    dynamic_type: Tensor
    is_nullable: true
    name: ggb
    type: const Tensor &
  - annotation: null
    dynamic_type: Tensor
    is_nullable: false
    name: gO
    type: const Tensor &
  - annotation: null
    dynamic_type: Tensor
    is_nullable: false
    name: weight
    type: const Tensor &
  - annotation: null
    dynamic_type: Tensor
    is_nullable: false
    name: self
    type: const Tensor &
  - annotation: null
    dynamic_type: IntArrayRef
    is_nullable: false
    name: stride
    type: IntArrayRef
  - annotation: null
    dynamic_type: IntArrayRef
    is_nullable: false
    name: padding
    type: IntArrayRef
  - annotation: null
    dynamic_type: IntArrayRef
    is_nullable: false
    name: dilation
    type: IntArrayRef
  - annotation: null
    dynamic_type: bool
    is_nullable: false
    name: transposed
    type: bool
  - annotation: null
    dynamic_type: IntArrayRef
    is_nullable: false
    name: output_padding
    type: IntArrayRef
  - annotation: null
    dynamic_type: int64_t
    is_nullable: false
    name: groups
    type: int64_t
  - annotation: null
    dynamic_type: bool
    is_nullable: false
    name: benchmark
    type: bool
  - annotation: null
    dynamic_type: bool
    is_nullable: false
    name: deterministic
    type: bool
  - annotation: null
    dynamic_type: bool
    is_nullable: false
    name: cudnn_enabled
    type: bool
  - annotation: null
    dynamic_type: std::array<bool,3>
    is_nullable: false
    name: output_mask
    type: std::array<bool,3>
  method_of:
  - Type
  - namespace
  mode: native
  python_module: ''
  returns:
  - dynamic_type: Tensor
    name: result0
    type: Tensor
  - dynamic_type: Tensor
    name: result1
    type: Tensor
  - dynamic_type: Tensor
    name: result2
    type: Tensor
  inplace: false
  is_factory_method: null
  abstract: false
  requires_tensor: false
  device_guard: true
  with_gil: false
  deprecated: false
- name: conv1d
  operator_name: conv1d
  overload_name: ''
  use_c10_dispatcher: unboxed_only
  category_override: ''
  matches_jit_signature: true
  schema_string: aten::conv1d(Tensor input, Tensor weight, Tensor? bias=None, int[1] stride=1, int[1] padding=0, int[1] dilation=1, int groups=1) -> Tensor
  method_prefix_derived: ''
  arguments:
  - annotation: null
    dynamic_type: Tensor
    is_nullable: false
    name: input
    type: const Tensor &
  - annotation: null
    dynamic_type: Tensor
    is_nullable: false
    name: weight
    type: const Tensor &
  - annotation: null
    default: '{}'
    dynamic_type: Tensor
    is_nullable: true
    name: bias
    type: const Tensor &
  - annotation: null
    default: 1
    dynamic_type: IntArrayRef
    is_nullable: false
    name: stride
    size: 1
    type: IntArrayRef
  - annotation: null
    default: 0
    dynamic_type: IntArrayRef
    is_nullable: false
    name: padding
    size: 1
    type: IntArrayRef
  - annotation: null
    default: 1
    dynamic_type: IntArrayRef
    is_nullable: false
    name: dilation
    size: 1
    type: IntArrayRef
  - annotation: null
    default: 1
    dynamic_type: int64_t
    is_nullable: false
    name: groups
    type: int64_t
  method_of:
  - Type
  - namespace
  mode: native
  python_module: ''
  returns:
  - dynamic_type: Tensor
    name: result
    type: Tensor
  inplace: false
  is_factory_method: null
  abstract: false
  requires_tensor: false
  device_guard: true
  with_gil: false
  deprecated: false
- name: conv2d
  operator_name: conv2d
  overload_name: ''
  use_c10_dispatcher: unboxed_only
  category_override: ''
  matches_jit_signature: true
  schema_string: aten::conv2d(Tensor input, Tensor weight, Tensor? bias=None, int[2] stride=1, int[2] padding=0, int[2] dilation=1, int groups=1) -> Tensor
  method_prefix_derived: ''
  arguments:
  - annotation: null
    dynamic_type: Tensor
    is_nullable: false
    name: input
    type: const Tensor &
  - annotation: null
    dynamic_type: Tensor
    is_nullable: false
    name: weight
    type: const Tensor &
  - annotation: null
    default: '{}'
    dynamic_type: Tensor
    is_nullable: true
    name: bias
    type: const Tensor &
  - annotation: null
    default: 1
    dynamic_type: IntArrayRef
    is_nullable: false
    name: stride
    size: 2
    type: IntArrayRef
  - annotation: null
    default: 0
    dynamic_type: IntArrayRef
    is_nullable: false
    name: padding
    size: 2
    type: IntArrayRef
  - annotation: null
    default: 1
    dynamic_type: IntArrayRef
    is_nullable: false
    name: dilation
    size: 2
    type: IntArrayRef
  - annotation: null
    default: 1
    dynamic_type: int64_t
    is_nullable: false
    name: groups
    type: int64_t
  method_of:
  - Type
  - namespace
  mode: native
  python_module: ''
  returns:
  - dynamic_type: Tensor
    name: result
    type: Tensor
  inplace: false
  is_factory_method: null
  abstract: false
  requires_tensor: false
  device_guard: true
  with_gil: false
  deprecated: false
- name: conv3d
  operator_name: conv3d
  overload_name: ''
  use_c10_dispatcher: unboxed_only
  category_override: ''
  matches_jit_signature: true
  schema_string: aten::conv3d(Tensor input, Tensor weight, Tensor? bias=None, int[3] stride=1, int[3] padding=0, int[3] dilation=1, int groups=1) -> Tensor
  method_prefix_derived: ''
  arguments:
  - annotation: null
    dynamic_type: Tensor
    is_nullable: false
    name: input
    type: const Tensor &
  - annotation: null
    dynamic_type: Tensor
    is_nullable: false
    name: weight
    type: const Tensor &
  - annotation: null
    default: '{}'
    dynamic_type: Tensor
    is_nullable: true
    name: bias
    type: const Tensor &
  - annotation: null
    default: 1
    dynamic_type: IntArrayRef
    is_nullable: false
    name: stride
    size: 3
    type: IntArrayRef
  - annotation: null
    default: 0
    dynamic_type: IntArrayRef
    is_nullable: false
    name: padding
    size: 3
    type: IntArrayRef
  - annotation: null
    default: 1
    dynamic_type: IntArrayRef
    is_nullable: false
    name: dilation
    size: 3
    type: IntArrayRef
  - annotation: null
    default: 1
    dynamic_type: int64_t
    is_nullable: false
    name: groups
    type: int64_t
  method_of:
  - Type
  - namespace
  mode: native
  python_module: ''
  returns:
  - dynamic_type: Tensor
    name: result
    type: Tensor
  inplace: false
  is_factory_method: null
  abstract: false
  requires_tensor: false
  device_guard: true
  with_gil: false
  deprecated: false
- name: conv_tbc
  operator_name: conv_tbc
  overload_name: ''
  use_c10_dispatcher: full
  category_override: ''
  matches_jit_signature: true
  schema_string: aten::conv_tbc(Tensor self, Tensor weight, Tensor bias, int pad=0) -> Tensor
  method_prefix_derived: ''
  arguments:
  - annotation: null
    dynamic_type: Tensor
    is_nullable: false
    name: self
    type: const Tensor &
  - annotation: null
    dynamic_type: Tensor
    is_nullable: false
    name: weight
    type: const Tensor &
  - annotation: null
    dynamic_type: Tensor
    is_nullable: false
    name: bias
    type: const Tensor &
  - annotation: null
    default: 0
    dynamic_type: int64_t
    is_nullable: false
    name: pad
    type: int64_t
  method_of:
  - Type
  - namespace
  mode: native
  python_module: ''
  returns:
  - dynamic_type: Tensor
    name: result
    type: Tensor
  inplace: false
  is_factory_method: null
  abstract: false
  requires_tensor: false
  device_guard: true
  with_gil: false
  deprecated: false
- name: conv_tbc_backward
  operator_name: conv_tbc_backward
  overload_name: ''
  use_c10_dispatcher: unboxed_only
  category_override: ''
  matches_jit_signature: true
  schema_string: aten::conv_tbc_backward(Tensor self, Tensor input, Tensor weight, Tensor bias, int pad) -> (Tensor, Tensor, Tensor)
  method_prefix_derived: ''
  arguments:
  - annotation: null
    dynamic_type: Tensor
    is_nullable: false
    name: self
    type: const Tensor &
  - annotation: null
    dynamic_type: Tensor
    is_nullable: false
    name: input
    type: const Tensor &
  - annotation: null
    dynamic_type: Tensor
    is_nullable: false
    name: weight
    type: const Tensor &
  - annotation: null
    dynamic_type: Tensor
    is_nullable: false
    name: bias
    type: const Tensor &
  - annotation: null
    dynamic_type: int64_t
    is_nullable: false
    name: pad
    type: int64_t
  method_of:
  - Type
  - namespace
  mode: native
  python_module: ''
  returns:
  - dynamic_type: Tensor
    name: result0
    type: Tensor
  - dynamic_type: Tensor
    name: result1
    type: Tensor
  - dynamic_type: Tensor
    name: result2
    type: Tensor
  inplace: false
  is_factory_method: null
  abstract: false
  requires_tensor: false
  device_guard: true
  with_gil: false
  deprecated: false
- name: conv_transpose1d
  operator_name: conv_transpose1d
  overload_name: ''
  use_c10_dispatcher: unboxed_only
  category_override: ''
  matches_jit_signature: true
  schema_string: aten::conv_transpose1d(Tensor input, Tensor weight, Tensor? bias=None, int[1] stride=1, int[1] padding=0, int[1] output_padding=0, int groups=1, int[1] dilation=1) -> Tensor
  method_prefix_derived: ''
  arguments:
  - annotation: null
    dynamic_type: Tensor
    is_nullable: false
    name: input
    type: const Tensor &
  - annotation: null
    dynamic_type: Tensor
    is_nullable: false
    name: weight
    type: const Tensor &
  - annotation: null
    default: '{}'
    dynamic_type: Tensor
    is_nullable: true
    name: bias
    type: const Tensor &
  - annotation: null
    default: 1
    dynamic_type: IntArrayRef
    is_nullable: false
    name: stride
    size: 1
    type: IntArrayRef
  - annotation: null
    default: 0
    dynamic_type: IntArrayRef
    is_nullable: false
    name: padding
    size: 1
    type: IntArrayRef
  - annotation: null
    default: 0
    dynamic_type: IntArrayRef
    is_nullable: false
    name: output_padding
    size: 1
    type: IntArrayRef
  - annotation: null
    default: 1
    dynamic_type: int64_t
    is_nullable: false
    name: groups
    type: int64_t
  - annotation: null
    default: 1
    dynamic_type: IntArrayRef
    is_nullable: false
    name: dilation
    size: 1
    type: IntArrayRef
  method_of:
  - Type
  - namespace
  mode: native
  python_module: ''
  returns:
  - dynamic_type: Tensor
    name: result
    type: Tensor
  inplace: false
  is_factory_method: null
  abstract: false
  requires_tensor: false
  device_guard: true
  with_gil: false
  deprecated: false
- name: conv_transpose2d
  operator_name: conv_transpose2d
  overload_name: input
  use_c10_dispatcher: unboxed_only
  category_override: ''
  matches_jit_signature: true
  schema_string: aten::conv_transpose2d.input(Tensor input, Tensor weight, Tensor? bias=None, int[2] stride=1, int[2] padding=0, int[2] output_padding=0, int groups=1, int[2] dilation=1) -> Tensor
  method_prefix_derived: ''
  arguments:
  - annotation: null
    dynamic_type: Tensor
    is_nullable: false
    name: input
    type: const Tensor &
  - annotation: null
    dynamic_type: Tensor
    is_nullable: false
    name: weight
    type: const Tensor &
  - annotation: null
    default: '{}'
    dynamic_type: Tensor
    is_nullable: true
    name: bias
    type: const Tensor &
  - annotation: null
    default: 1
    dynamic_type: IntArrayRef
    is_nullable: false
    name: stride
    size: 2
    type: IntArrayRef
  - annotation: null
    default: 0
    dynamic_type: IntArrayRef
    is_nullable: false
    name: padding
    size: 2
    type: IntArrayRef
  - annotation: null
    default: 0
    dynamic_type: IntArrayRef
    is_nullable: false
    name: output_padding
    size: 2
    type: IntArrayRef
  - annotation: null
    default: 1
    dynamic_type: int64_t
    is_nullable: false
    name: groups
    type: int64_t
  - annotation: null
    default: 1
    dynamic_type: IntArrayRef
    is_nullable: false
    name: dilation
    size: 2
    type: IntArrayRef
  method_of:
  - Type
  - namespace
  mode: native
  python_module: ''
  returns:
  - dynamic_type: Tensor
    name: result
    type: Tensor
  inplace: false
  is_factory_method: null
  abstract: false
  requires_tensor: false
  device_guard: true
  with_gil: false
  deprecated: false
- name: conv_transpose3d
  operator_name: conv_transpose3d
  overload_name: input
  use_c10_dispatcher: unboxed_only
  category_override: ''
  matches_jit_signature: true
  schema_string: aten::conv_transpose3d.input(Tensor input, Tensor weight, Tensor? bias=None, int[3] stride=1, int[3] padding=0, int[3] output_padding=0, int groups=1, int[3] dilation=1) -> Tensor
  method_prefix_derived: ''
  arguments:
  - annotation: null
    dynamic_type: Tensor
    is_nullable: false
    name: input
    type: const Tensor &
  - annotation: null
    dynamic_type: Tensor
    is_nullable: false
    name: weight
    type: const Tensor &
  - annotation: null
    default: '{}'
    dynamic_type: Tensor
    is_nullable: true
    name: bias
    type: const Tensor &
  - annotation: null
    default: 1
    dynamic_type: IntArrayRef
    is_nullable: false
    name: stride
    size: 3
    type: IntArrayRef
  - annotation: null
    default: 0
    dynamic_type: IntArrayRef
    is_nullable: false
    name: padding
    size: 3
    type: IntArrayRef
  - annotation: null
    default: 0
    dynamic_type: IntArrayRef
    is_nullable: false
    name: output_padding
    size: 3
    type: IntArrayRef
  - annotation: null
    default: 1
    dynamic_type: int64_t
    is_nullable: false
    name: groups
    type: int64_t
  - annotation: null
    default: 1
    dynamic_type: IntArrayRef
    is_nullable: false
    name: dilation
    size: 3
    type: IntArrayRef
  method_of:
  - Type
  - namespace
  mode: native
  python_module: ''
  returns:
  - dynamic_type: Tensor
    name: result
    type: Tensor
  inplace: false
  is_factory_method: null
  abstract: false
  requires_tensor: false
  device_guard: true
  with_gil: false
  deprecated: false
- name: copy_
  operator_name: copy_
  overload_name: ''
  use_c10_dispatcher: unboxed_only
  category_override: ''
  matches_jit_signature: true
  schema_string: aten::copy_(Tensor(a!) self, Tensor src, bool non_blocking=False) -> Tensor(a!)
  method_prefix_derived: ''
  arguments:
  - annotation: a!
    dynamic_type: Tensor
    is_nullable: false
    name: self
    type: Tensor &
  - annotation: null
    dynamic_type: Tensor
    is_nullable: false
    name: src
    type: const Tensor &
  - annotation: null
    default: false
    dynamic_type: bool
    is_nullable: false
    name: non_blocking
    type: bool
  method_of:
  - Type
  - Tensor
  mode: native
  python_module: ''
  returns:
  - dynamic_type: Tensor
    name: self
    type: Tensor &
  inplace: true
  is_factory_method: null
  abstract: false
  requires_tensor: false
  device_guard: false
  with_gil: false
  deprecated: false
- name: _copy_from
  operator_name: _copy_from
  overload_name: ''
  use_c10_dispatcher: full
  category_override: ''
  matches_jit_signature: true
  schema_string: aten::_copy_from(Tensor self, Tensor dst, bool non_blocking=False) -> Tensor
  method_prefix_derived: ''
  arguments:
  - annotation: null
    dynamic_type: Tensor
    is_nullable: false
    name: self
    type: const Tensor &
  - annotation: null
    dynamic_type: Tensor
    is_nullable: false
    name: dst
    type: const Tensor &
  - annotation: null
    default: false
    dynamic_type: bool
    is_nullable: false
    name: non_blocking
    type: bool
  method_of:
  - Type
  - namespace
  mode: native
  python_module: ''
  returns:
  - dynamic_type: Tensor
    name: result
    type: Tensor
  inplace: false
  is_factory_method: null
  abstract: true
  requires_tensor: false
  device_guard: true
  with_gil: false
  deprecated: false
- name: cos
  operator_name: cos
  overload_name: ''
  use_c10_dispatcher: full
  category_override: ''
  matches_jit_signature: true
  schema_string: aten::cos(Tensor self) -> Tensor
  method_prefix_derived: ''
  arguments:
  - annotation: null
    dynamic_type: Tensor
    is_nullable: false
    name: self
    type: const Tensor &
  method_of:
  - Type
  - Tensor
  - namespace
  mode: native
  python_module: ''
  returns:
  - dynamic_type: Tensor
    name: result
    type: Tensor
  inplace: false
  is_factory_method: null
  abstract: false
  requires_tensor: false
  device_guard: true
  with_gil: false
  deprecated: false
- name: cos_
  operator_name: cos_
  overload_name: ''
  use_c10_dispatcher: unboxed_only
  category_override: ''
  matches_jit_signature: true
  schema_string: aten::cos_(Tensor(a!) self) -> Tensor(a!)
  method_prefix_derived: ''
  arguments:
  - annotation: a!
    dynamic_type: Tensor
    is_nullable: false
    name: self
    type: Tensor &
  method_of:
  - Type
  - Tensor
  - namespace
  mode: native
  python_module: ''
  returns:
  - dynamic_type: Tensor
    name: self
    type: Tensor &
  inplace: true
  is_factory_method: null
  abstract: true
  requires_tensor: false
  device_guard: true
  with_gil: false
  deprecated: false
- name: cos_out
  operator_name: cos
  overload_name: out
  use_c10_dispatcher: unboxed_only
  category_override: ''
  matches_jit_signature: true
  schema_string: aten::cos.out(Tensor self, *, Tensor(a!) out) -> Tensor(a!)
  method_prefix_derived: ''
  arguments:
  - allocate: true
    annotation: a!
    dynamic_type: Tensor
    is_nullable: false
    kwarg_only: false
    name: out
    output: true
    type: Tensor &
  - annotation: null
    dynamic_type: Tensor
    is_nullable: false
    name: self
    type: const Tensor &
  method_of:
  - Type
  - namespace
  mode: native
  python_module: ''
  returns:
  - dynamic_type: Tensor
    name: out
    type: Tensor &
  inplace: false
  is_factory_method: null
  abstract: true
  requires_tensor: false
  device_guard: true
  with_gil: false
  deprecated: false
- name: cosh
  operator_name: cosh
  overload_name: ''
  use_c10_dispatcher: full
  category_override: ''
  matches_jit_signature: true
  schema_string: aten::cosh(Tensor self) -> Tensor
  method_prefix_derived: ''
  arguments:
  - annotation: null
    dynamic_type: Tensor
    is_nullable: false
    name: self
    type: const Tensor &
  method_of:
  - Type
  - Tensor
  - namespace
  mode: native
  python_module: ''
  returns:
  - dynamic_type: Tensor
    name: result
    type: Tensor
  inplace: false
  is_factory_method: null
  abstract: false
  requires_tensor: false
  device_guard: true
  with_gil: false
  deprecated: false
- name: cosh_
  operator_name: cosh_
  overload_name: ''
  use_c10_dispatcher: unboxed_only
  category_override: ''
  matches_jit_signature: true
  schema_string: aten::cosh_(Tensor(a!) self) -> Tensor(a!)
  method_prefix_derived: ''
  arguments:
  - annotation: a!
    dynamic_type: Tensor
    is_nullable: false
    name: self
    type: Tensor &
  method_of:
  - Type
  - Tensor
  - namespace
  mode: native
  python_module: ''
  returns:
  - dynamic_type: Tensor
    name: self
    type: Tensor &
  inplace: true
  is_factory_method: null
  abstract: true
  requires_tensor: false
  device_guard: true
  with_gil: false
  deprecated: false
- name: cosh_out
  operator_name: cosh
  overload_name: out
  use_c10_dispatcher: unboxed_only
  category_override: ''
  matches_jit_signature: true
  schema_string: aten::cosh.out(Tensor self, *, Tensor(a!) out) -> Tensor(a!)
  method_prefix_derived: ''
  arguments:
  - allocate: true
    annotation: a!
    dynamic_type: Tensor
    is_nullable: false
    kwarg_only: false
    name: out
    output: true
    type: Tensor &
  - annotation: null
    dynamic_type: Tensor
    is_nullable: false
    name: self
    type: const Tensor &
  method_of:
  - Type
  - namespace
  mode: native
  python_module: ''
  returns:
  - dynamic_type: Tensor
    name: out
    type: Tensor &
  inplace: false
  is_factory_method: null
  abstract: true
  requires_tensor: false
  device_guard: true
  with_gil: false
  deprecated: false
- name: cosine_embedding_loss
  operator_name: cosine_embedding_loss
  overload_name: ''
  use_c10_dispatcher: full
  category_override: ''
  matches_jit_signature: true
  schema_string: aten::cosine_embedding_loss(Tensor input1, Tensor input2, Tensor target, float margin=0.0, int reduction=Mean) -> Tensor
  method_prefix_derived: ''
  arguments:
  - annotation: null
    dynamic_type: Tensor
    is_nullable: false
    name: input1
    type: const Tensor &
  - annotation: null
    dynamic_type: Tensor
    is_nullable: false
    name: input2
    type: const Tensor &
  - annotation: null
    dynamic_type: Tensor
    is_nullable: false
    name: target
    type: const Tensor &
  - annotation: null
    default: 0.0
    dynamic_type: double
    is_nullable: false
    name: margin
    type: double
  - annotation: null
    default: at::Reduction::Mean
    dynamic_type: int64_t
    is_nullable: false
    name: reduction
    type: int64_t
  method_of:
  - Type
  - namespace
  mode: native
  python_module: ''
  returns:
  - dynamic_type: Tensor
    name: result
    type: Tensor
  inplace: false
  is_factory_method: null
  abstract: false
  requires_tensor: false
  device_guard: true
  with_gil: false
  deprecated: false
- name: cudnn_affine_grid_generator
  operator_name: cudnn_affine_grid_generator
  overload_name: ''
  use_c10_dispatcher: full
  category_override: ''
  matches_jit_signature: true
  schema_string: aten::cudnn_affine_grid_generator(Tensor theta, int N, int C, int H, int W) -> Tensor grid
  method_prefix_derived: ''
  arguments:
  - annotation: null
    dynamic_type: Tensor
    is_nullable: false
    name: theta
    type: const Tensor &
  - annotation: null
    dynamic_type: int64_t
    is_nullable: false
    name: N
    type: int64_t
  - annotation: null
    dynamic_type: int64_t
    is_nullable: false
    name: C
    type: int64_t
  - annotation: null
    dynamic_type: int64_t
    is_nullable: false
    name: H
    type: int64_t
  - annotation: null
    dynamic_type: int64_t
    is_nullable: false
    name: W
    type: int64_t
  method_of:
  - Type
  - namespace
  mode: native
  python_module: ''
  returns:
  - dynamic_type: Tensor
    field_name: grid
    name: grid_return
    type: Tensor
  inplace: false
  is_factory_method: null
  abstract: true
  requires_tensor: false
  device_guard: true
  with_gil: false
  deprecated: false
- name: cudnn_affine_grid_generator_backward
  operator_name: cudnn_affine_grid_generator_backward
  overload_name: ''
  use_c10_dispatcher: full
  category_override: ''
  matches_jit_signature: true
  schema_string: aten::cudnn_affine_grid_generator_backward(Tensor grad, int N, int C, int H, int W) -> Tensor grad_theta
  method_prefix_derived: ''
  arguments:
  - annotation: null
    dynamic_type: Tensor
    is_nullable: false
    name: grad
    type: const Tensor &
  - annotation: null
    dynamic_type: int64_t
    is_nullable: false
    name: N
    type: int64_t
  - annotation: null
    dynamic_type: int64_t
    is_nullable: false
    name: C
    type: int64_t
  - annotation: null
    dynamic_type: int64_t
    is_nullable: false
    name: H
    type: int64_t
  - annotation: null
    dynamic_type: int64_t
    is_nullable: false
    name: W
    type: int64_t
  method_of:
  - Type
  - namespace
  mode: native
  python_module: ''
  returns:
  - dynamic_type: Tensor
    field_name: grad_theta
    name: grad_theta
    type: Tensor
  inplace: false
  is_factory_method: null
  abstract: true
  requires_tensor: false
  device_guard: true
  with_gil: false
  deprecated: false
- name: cudnn_batch_norm
  operator_name: cudnn_batch_norm
  overload_name: ''
  use_c10_dispatcher: unboxed_only
  category_override: ''
  matches_jit_signature: true
  schema_string: aten::cudnn_batch_norm(Tensor input, Tensor weight, Tensor? bias, Tensor? running_mean, Tensor? running_var, bool training, float exponential_average_factor, float epsilon) -> (Tensor, Tensor, Tensor, Tensor)
  method_prefix_derived: ''
  arguments:
  - annotation: null
    dynamic_type: Tensor
    is_nullable: false
    name: input
    type: const Tensor &
  - annotation: null
    dynamic_type: Tensor
    is_nullable: false
    name: weight
    type: const Tensor &
  - annotation: null
    dynamic_type: Tensor
    is_nullable: true
    name: bias
    type: const Tensor &
  - annotation: null
    dynamic_type: Tensor
    is_nullable: true
    name: running_mean
    type: const Tensor &
  - annotation: null
    dynamic_type: Tensor
    is_nullable: true
    name: running_var
    type: const Tensor &
  - annotation: null
    dynamic_type: bool
    is_nullable: false
    name: training
    type: bool
  - annotation: null
    dynamic_type: double
    is_nullable: false
    name: exponential_average_factor
    type: double
  - annotation: null
    dynamic_type: double
    is_nullable: false
    name: epsilon
    type: double
  method_of:
  - Type
  - namespace
  mode: native
  python_module: ''
  returns:
  - dynamic_type: Tensor
    name: result0
    type: Tensor
  - dynamic_type: Tensor
    name: result1
    type: Tensor
  - dynamic_type: Tensor
    name: result2
    type: Tensor
  - dynamic_type: Tensor
    name: result3
    type: Tensor
  inplace: false
  is_factory_method: null
  abstract: true
  requires_tensor: false
  device_guard: true
  with_gil: false
  deprecated: false
- name: cudnn_batch_norm_backward
  operator_name: cudnn_batch_norm_backward
  overload_name: ''
  use_c10_dispatcher: unboxed_only
  category_override: ''
  matches_jit_signature: true
  schema_string: aten::cudnn_batch_norm_backward(Tensor input, Tensor grad_output, Tensor weight, Tensor? running_mean, Tensor? running_var, Tensor? save_mean, Tensor? save_var, float epsilon, Tensor reserveSpace) -> (Tensor, Tensor, Tensor)
  method_prefix_derived: ''
  arguments:
  - annotation: null
    dynamic_type: Tensor
    is_nullable: false
    name: input
    type: const Tensor &
  - annotation: null
    dynamic_type: Tensor
    is_nullable: false
    name: grad_output
    type: const Tensor &
  - annotation: null
    dynamic_type: Tensor
    is_nullable: false
    name: weight
    type: const Tensor &
  - annotation: null
    dynamic_type: Tensor
    is_nullable: true
    name: running_mean
    type: const Tensor &
  - annotation: null
    dynamic_type: Tensor
    is_nullable: true
    name: running_var
    type: const Tensor &
  - annotation: null
    dynamic_type: Tensor
    is_nullable: true
    name: save_mean
    type: const Tensor &
  - annotation: null
    dynamic_type: Tensor
    is_nullable: true
    name: save_var
    type: const Tensor &
  - annotation: null
    dynamic_type: double
    is_nullable: false
    name: epsilon
    type: double
  - annotation: null
    dynamic_type: Tensor
    is_nullable: false
    name: reserveSpace
    type: const Tensor &
  method_of:
  - Type
  - namespace
  mode: native
  python_module: ''
  returns:
  - dynamic_type: Tensor
    name: result0
    type: Tensor
  - dynamic_type: Tensor
    name: result1
    type: Tensor
  - dynamic_type: Tensor
    name: result2
    type: Tensor
  inplace: false
  is_factory_method: null
  abstract: true
  requires_tensor: false
  device_guard: true
  with_gil: false
  deprecated: false
- name: cudnn_convolution
  operator_name: cudnn_convolution
  overload_name: ''
  use_c10_dispatcher: unboxed_only
  category_override: ''
  matches_jit_signature: true
  schema_string: aten::cudnn_convolution(Tensor self, Tensor weight, Tensor? bias, int[] padding, int[] stride, int[] dilation, int groups, bool benchmark, bool deterministic) -> Tensor
  method_prefix_derived: ''
  arguments:
  - annotation: null
    dynamic_type: Tensor
    is_nullable: false
    name: self
    type: const Tensor &
  - annotation: null
    dynamic_type: Tensor
    is_nullable: false
    name: weight
    type: const Tensor &
  - annotation: null
    dynamic_type: Tensor
    is_nullable: true
    name: bias
    type: const Tensor &
  - annotation: null
    dynamic_type: IntArrayRef
    is_nullable: false
    name: padding
    type: IntArrayRef
  - annotation: null
    dynamic_type: IntArrayRef
    is_nullable: false
    name: stride
    type: IntArrayRef
  - annotation: null
    dynamic_type: IntArrayRef
    is_nullable: false
    name: dilation
    type: IntArrayRef
  - annotation: null
    dynamic_type: int64_t
    is_nullable: false
    name: groups
    type: int64_t
  - annotation: null
    dynamic_type: bool
    is_nullable: false
    name: benchmark
    type: bool
  - annotation: null
    dynamic_type: bool
    is_nullable: false
    name: deterministic
    type: bool
  method_of:
  - Type
  - namespace
  mode: native
  python_module: ''
  returns:
  - dynamic_type: Tensor
    name: result
    type: Tensor
  inplace: false
  is_factory_method: null
  abstract: true
  requires_tensor: false
  device_guard: true
  with_gil: false
  deprecated: false
- name: cudnn_convolution_backward_input
  operator_name: cudnn_convolution_backward_input
  overload_name: ''
  use_c10_dispatcher: unboxed_only
  category_override: ''
  matches_jit_signature: true
  schema_string: aten::cudnn_convolution_backward_input(int[] self_size, Tensor grad_output, Tensor weight, int[] padding, int[] stride, int[] dilation, int groups, bool benchmark, bool deterministic) -> Tensor
  method_prefix_derived: ''
  arguments:
  - annotation: null
    dynamic_type: IntArrayRef
    is_nullable: false
    name: self_size
    type: IntArrayRef
  - annotation: null
    dynamic_type: Tensor
    is_nullable: false
    name: grad_output
    type: const Tensor &
  - annotation: null
    dynamic_type: Tensor
    is_nullable: false
    name: weight
    type: const Tensor &
  - annotation: null
    dynamic_type: IntArrayRef
    is_nullable: false
    name: padding
    type: IntArrayRef
  - annotation: null
    dynamic_type: IntArrayRef
    is_nullable: false
    name: stride
    type: IntArrayRef
  - annotation: null
    dynamic_type: IntArrayRef
    is_nullable: false
    name: dilation
    type: IntArrayRef
  - annotation: null
    dynamic_type: int64_t
    is_nullable: false
    name: groups
    type: int64_t
  - annotation: null
    dynamic_type: bool
    is_nullable: false
    name: benchmark
    type: bool
  - annotation: null
    dynamic_type: bool
    is_nullable: false
    name: deterministic
    type: bool
  method_of:
  - Type
  - namespace
  mode: native
  python_module: ''
  returns:
  - dynamic_type: Tensor
    name: result
    type: Tensor
  inplace: false
  is_factory_method: null
  abstract: true
  requires_tensor: false
  device_guard: true
  with_gil: false
  deprecated: false
- name: cudnn_convolution_backward
  operator_name: cudnn_convolution_backward
  overload_name: ''
  use_c10_dispatcher: unboxed_only
  category_override: ''
  matches_jit_signature: true
  schema_string: aten::cudnn_convolution_backward(Tensor self, Tensor grad_output, Tensor weight, int[] padding, int[] stride, int[] dilation, int groups, bool benchmark, bool deterministic, bool[3] output_mask) -> (Tensor, Tensor, Tensor)
  method_prefix_derived: ''
  arguments:
  - annotation: null
    dynamic_type: Tensor
    is_nullable: false
    name: self
    type: const Tensor &
  - annotation: null
    dynamic_type: Tensor
    is_nullable: false
    name: grad_output
    type: const Tensor &
  - annotation: null
    dynamic_type: Tensor
    is_nullable: false
    name: weight
    type: const Tensor &
  - annotation: null
    dynamic_type: IntArrayRef
    is_nullable: false
    name: padding
    type: IntArrayRef
  - annotation: null
    dynamic_type: IntArrayRef
    is_nullable: false
    name: stride
    type: IntArrayRef
  - annotation: null
    dynamic_type: IntArrayRef
    is_nullable: false
    name: dilation
    type: IntArrayRef
  - annotation: null
    dynamic_type: int64_t
    is_nullable: false
    name: groups
    type: int64_t
  - annotation: null
    dynamic_type: bool
    is_nullable: false
    name: benchmark
    type: bool
  - annotation: null
    dynamic_type: bool
    is_nullable: false
    name: deterministic
    type: bool
  - annotation: null
    dynamic_type: std::array<bool,3>
    is_nullable: false
    name: output_mask
    type: std::array<bool,3>
  method_of:
  - Type
  - namespace
  mode: native
  python_module: ''
  returns:
  - dynamic_type: Tensor
    name: result0
    type: Tensor
  - dynamic_type: Tensor
    name: result1
    type: Tensor
  - dynamic_type: Tensor
    name: result2
    type: Tensor
  inplace: false
  is_factory_method: null
  abstract: true
  requires_tensor: false
  device_guard: true
  with_gil: false
  deprecated: false
- name: cudnn_convolution_backward_bias
  operator_name: cudnn_convolution_backward_bias
  overload_name: ''
  use_c10_dispatcher: full
  category_override: ''
  matches_jit_signature: true
  schema_string: aten::cudnn_convolution_backward_bias(Tensor grad_output) -> Tensor
  method_prefix_derived: ''
  arguments:
  - annotation: null
    dynamic_type: Tensor
    is_nullable: false
    name: grad_output
    type: const Tensor &
  method_of:
  - Type
  - namespace
  mode: native
  python_module: ''
  returns:
  - dynamic_type: Tensor
    name: result
    type: Tensor
  inplace: false
  is_factory_method: null
  abstract: true
  requires_tensor: false
  device_guard: true
  with_gil: false
  deprecated: false
- name: cudnn_convolution_backward_weight
  operator_name: cudnn_convolution_backward_weight
  overload_name: ''
  use_c10_dispatcher: unboxed_only
  category_override: ''
  matches_jit_signature: true
  schema_string: aten::cudnn_convolution_backward_weight(int[] weight_size, Tensor grad_output, Tensor self, int[] padding, int[] stride, int[] dilation, int groups, bool benchmark, bool deterministic) -> Tensor
  method_prefix_derived: ''
  arguments:
  - annotation: null
    dynamic_type: IntArrayRef
    is_nullable: false
    name: weight_size
    type: IntArrayRef
  - annotation: null
    dynamic_type: Tensor
    is_nullable: false
    name: grad_output
    type: const Tensor &
  - annotation: null
    dynamic_type: Tensor
    is_nullable: false
    name: self
    type: const Tensor &
  - annotation: null
    dynamic_type: IntArrayRef
    is_nullable: false
    name: padding
    type: IntArrayRef
  - annotation: null
    dynamic_type: IntArrayRef
    is_nullable: false
    name: stride
    type: IntArrayRef
  - annotation: null
    dynamic_type: IntArrayRef
    is_nullable: false
    name: dilation
    type: IntArrayRef
  - annotation: null
    dynamic_type: int64_t
    is_nullable: false
    name: groups
    type: int64_t
  - annotation: null
    dynamic_type: bool
    is_nullable: false
    name: benchmark
    type: bool
  - annotation: null
    dynamic_type: bool
    is_nullable: false
    name: deterministic
    type: bool
  method_of:
  - Type
  - namespace
  mode: native
  python_module: ''
  returns:
  - dynamic_type: Tensor
    name: result
    type: Tensor
  inplace: false
  is_factory_method: null
  abstract: true
  requires_tensor: false
  device_guard: true
  with_gil: false
  deprecated: false
- name: cudnn_convolution_transpose
  operator_name: cudnn_convolution_transpose
  overload_name: ''
  use_c10_dispatcher: unboxed_only
  category_override: ''
  matches_jit_signature: true
  schema_string: aten::cudnn_convolution_transpose(Tensor self, Tensor weight, Tensor? bias, int[] padding, int[] output_padding, int[] stride, int[] dilation, int groups, bool benchmark, bool deterministic) -> Tensor
  method_prefix_derived: ''
  arguments:
  - annotation: null
    dynamic_type: Tensor
    is_nullable: false
    name: self
    type: const Tensor &
  - annotation: null
    dynamic_type: Tensor
    is_nullable: false
    name: weight
    type: const Tensor &
  - annotation: null
    dynamic_type: Tensor
    is_nullable: true
    name: bias
    type: const Tensor &
  - annotation: null
    dynamic_type: IntArrayRef
    is_nullable: false
    name: padding
    type: IntArrayRef
  - annotation: null
    dynamic_type: IntArrayRef
    is_nullable: false
    name: output_padding
    type: IntArrayRef
  - annotation: null
    dynamic_type: IntArrayRef
    is_nullable: false
    name: stride
    type: IntArrayRef
  - annotation: null
    dynamic_type: IntArrayRef
    is_nullable: false
    name: dilation
    type: IntArrayRef
  - annotation: null
    dynamic_type: int64_t
    is_nullable: false
    name: groups
    type: int64_t
  - annotation: null
    dynamic_type: bool
    is_nullable: false
    name: benchmark
    type: bool
  - annotation: null
    dynamic_type: bool
    is_nullable: false
    name: deterministic
    type: bool
  method_of:
  - Type
  - namespace
  mode: native
  python_module: ''
  returns:
  - dynamic_type: Tensor
    name: result
    type: Tensor
  inplace: false
  is_factory_method: null
  abstract: true
  requires_tensor: false
  device_guard: true
  with_gil: false
  deprecated: false
- name: cudnn_convolution_transpose_backward
  operator_name: cudnn_convolution_transpose_backward
  overload_name: ''
  use_c10_dispatcher: unboxed_only
  category_override: ''
  matches_jit_signature: true
  schema_string: aten::cudnn_convolution_transpose_backward(Tensor self, Tensor grad_output, Tensor weight, int[] padding, int[] output_padding, int[] stride, int[] dilation, int groups, bool benchmark, bool deterministic, bool[3] output_mask) -> (Tensor, Tensor, Tensor)
  method_prefix_derived: ''
  arguments:
  - annotation: null
    dynamic_type: Tensor
    is_nullable: false
    name: self
    type: const Tensor &
  - annotation: null
    dynamic_type: Tensor
    is_nullable: false
    name: grad_output
    type: const Tensor &
  - annotation: null
    dynamic_type: Tensor
    is_nullable: false
    name: weight
    type: const Tensor &
  - annotation: null
    dynamic_type: IntArrayRef
    is_nullable: false
    name: padding
    type: IntArrayRef
  - annotation: null
    dynamic_type: IntArrayRef
    is_nullable: false
    name: output_padding
    type: IntArrayRef
  - annotation: null
    dynamic_type: IntArrayRef
    is_nullable: false
    name: stride
    type: IntArrayRef
  - annotation: null
    dynamic_type: IntArrayRef
    is_nullable: false
    name: dilation
    type: IntArrayRef
  - annotation: null
    dynamic_type: int64_t
    is_nullable: false
    name: groups
    type: int64_t
  - annotation: null
    dynamic_type: bool
    is_nullable: false
    name: benchmark
    type: bool
  - annotation: null
    dynamic_type: bool
    is_nullable: false
    name: deterministic
    type: bool
  - annotation: null
    dynamic_type: std::array<bool,3>
    is_nullable: false
    name: output_mask
    type: std::array<bool,3>
  method_of:
  - Type
  - namespace
  mode: native
  python_module: ''
  returns:
  - dynamic_type: Tensor
    name: result0
    type: Tensor
  - dynamic_type: Tensor
    name: result1
    type: Tensor
  - dynamic_type: Tensor
    name: result2
    type: Tensor
  inplace: false
  is_factory_method: null
  abstract: true
  requires_tensor: false
  device_guard: true
  with_gil: false
  deprecated: false
- name: cudnn_convolution_transpose_backward_bias
  operator_name: cudnn_convolution_transpose_backward_bias
  overload_name: ''
  use_c10_dispatcher: full
  category_override: ''
  matches_jit_signature: true
  schema_string: aten::cudnn_convolution_transpose_backward_bias(Tensor grad_output) -> Tensor
  method_prefix_derived: ''
  arguments:
  - annotation: null
    dynamic_type: Tensor
    is_nullable: false
    name: grad_output
    type: const Tensor &
  method_of:
  - Type
  - namespace
  mode: native
  python_module: ''
  returns:
  - dynamic_type: Tensor
    name: result
    type: Tensor
  inplace: false
  is_factory_method: null
  abstract: true
  requires_tensor: false
  device_guard: true
  with_gil: false
  deprecated: false
- name: cudnn_convolution_transpose_backward_input
  operator_name: cudnn_convolution_transpose_backward_input
  overload_name: ''
  use_c10_dispatcher: unboxed_only
  category_override: ''
  matches_jit_signature: true
  schema_string: aten::cudnn_convolution_transpose_backward_input(Tensor grad_output, Tensor weight, int[] padding, int[] stride, int[] dilation, int groups, bool benchmark, bool deterministic) -> Tensor
  method_prefix_derived: ''
  arguments:
  - annotation: null
    dynamic_type: Tensor
    is_nullable: false
    name: grad_output
    type: const Tensor &
  - annotation: null
    dynamic_type: Tensor
    is_nullable: false
    name: weight
    type: const Tensor &
  - annotation: null
    dynamic_type: IntArrayRef
    is_nullable: false
    name: padding
    type: IntArrayRef
  - annotation: null
    dynamic_type: IntArrayRef
    is_nullable: false
    name: stride
    type: IntArrayRef
  - annotation: null
    dynamic_type: IntArrayRef
    is_nullable: false
    name: dilation
    type: IntArrayRef
  - annotation: null
    dynamic_type: int64_t
    is_nullable: false
    name: groups
    type: int64_t
  - annotation: null
    dynamic_type: bool
    is_nullable: false
    name: benchmark
    type: bool
  - annotation: null
    dynamic_type: bool
    is_nullable: false
    name: deterministic
    type: bool
  method_of:
  - Type
  - namespace
  mode: native
  python_module: ''
  returns:
  - dynamic_type: Tensor
    name: result
    type: Tensor
  inplace: false
  is_factory_method: null
  abstract: true
  requires_tensor: false
  device_guard: true
  with_gil: false
  deprecated: false
- name: cudnn_convolution_transpose_backward_weight
  operator_name: cudnn_convolution_transpose_backward_weight
  overload_name: ''
  use_c10_dispatcher: unboxed_only
  category_override: ''
  matches_jit_signature: true
  schema_string: aten::cudnn_convolution_transpose_backward_weight(int[] weight_size, Tensor grad_output, Tensor self, int[] padding, int[] stride, int[] dilation, int groups, bool benchmark, bool deterministic) -> Tensor
  method_prefix_derived: ''
  arguments:
  - annotation: null
    dynamic_type: IntArrayRef
    is_nullable: false
    name: weight_size
    type: IntArrayRef
  - annotation: null
    dynamic_type: Tensor
    is_nullable: false
    name: grad_output
    type: const Tensor &
  - annotation: null
    dynamic_type: Tensor
    is_nullable: false
    name: self
    type: const Tensor &
  - annotation: null
    dynamic_type: IntArrayRef
    is_nullable: false
    name: padding
    type: IntArrayRef
  - annotation: null
    dynamic_type: IntArrayRef
    is_nullable: false
    name: stride
    type: IntArrayRef
  - annotation: null
    dynamic_type: IntArrayRef
    is_nullable: false
    name: dilation
    type: IntArrayRef
  - annotation: null
    dynamic_type: int64_t
    is_nullable: false
    name: groups
    type: int64_t
  - annotation: null
    dynamic_type: bool
    is_nullable: false
    name: benchmark
    type: bool
  - annotation: null
    dynamic_type: bool
    is_nullable: false
    name: deterministic
    type: bool
  method_of:
  - Type
  - namespace
  mode: native
  python_module: ''
  returns:
  - dynamic_type: Tensor
    name: result
    type: Tensor
  inplace: false
  is_factory_method: null
  abstract: true
  requires_tensor: false
  device_guard: true
  with_gil: false
  deprecated: false
- name: cudnn_grid_sampler
  operator_name: cudnn_grid_sampler
  overload_name: ''
  use_c10_dispatcher: full
  category_override: ''
  matches_jit_signature: true
  schema_string: aten::cudnn_grid_sampler(Tensor self, Tensor grid) -> Tensor output
  method_prefix_derived: ''
  arguments:
  - annotation: null
    dynamic_type: Tensor
    is_nullable: false
    name: self
    type: const Tensor &
  - annotation: null
    dynamic_type: Tensor
    is_nullable: false
    name: grid
    type: const Tensor &
  method_of:
  - Type
  - namespace
  mode: native
  python_module: ''
  returns:
  - dynamic_type: Tensor
    field_name: output
    name: output
    type: Tensor
  inplace: false
  is_factory_method: null
  abstract: true
  requires_tensor: false
  device_guard: true
  with_gil: false
  deprecated: false
- name: cudnn_grid_sampler_backward
  operator_name: cudnn_grid_sampler_backward
  overload_name: ''
  use_c10_dispatcher: unboxed_only
  category_override: ''
  matches_jit_signature: true
  schema_string: aten::cudnn_grid_sampler_backward(Tensor self, Tensor grid, Tensor grad_output) -> (Tensor grad_self, Tensor grad_grid)
  method_prefix_derived: ''
  arguments:
  - annotation: null
    dynamic_type: Tensor
    is_nullable: false
    name: self
    type: const Tensor &
  - annotation: null
    dynamic_type: Tensor
    is_nullable: false
    name: grid
    type: const Tensor &
  - annotation: null
    dynamic_type: Tensor
    is_nullable: false
    name: grad_output
    type: const Tensor &
  method_of:
  - Type
  - namespace
  mode: native
  python_module: ''
  returns:
  - dynamic_type: Tensor
    field_name: grad_self
    name: grad_self
    type: Tensor
  - dynamic_type: Tensor
    field_name: grad_grid
    name: grad_grid
    type: Tensor
  inplace: false
  is_factory_method: null
  abstract: true
  requires_tensor: false
  device_guard: true
  with_gil: false
  deprecated: false
- name: cumsum
  operator_name: cumsum
  overload_name: ''
  use_c10_dispatcher: unboxed_only
  category_override: ''
  matches_jit_signature: true
  schema_string: aten::cumsum(Tensor self, int dim, *, ScalarType? dtype=None) -> Tensor
  method_prefix_derived: ''
  arguments:
  - annotation: null
    dynamic_type: Tensor
    is_nullable: false
    name: self
    type: const Tensor &
  - annotation: null
    dynamic_type: int64_t
    is_nullable: false
    name: dim
    type: int64_t
  - annotation: null
    default: c10::nullopt
    dynamic_type: ScalarType
    is_nullable: true
    kwarg_only: true
    name: dtype
    type: c10::optional<ScalarType>
  method_of:
  - Type
  - Tensor
  - namespace
  mode: native
  python_module: ''
  returns:
  - dynamic_type: Tensor
    name: result
    type: Tensor
  inplace: false
  is_factory_method: null
  abstract: false
  requires_tensor: false
  device_guard: true
  with_gil: false
  deprecated: false
- name: cumsum_out
  operator_name: cumsum
  overload_name: out
  use_c10_dispatcher: unboxed_only
  category_override: ''
  matches_jit_signature: true
  schema_string: aten::cumsum.out(Tensor self, int dim, *, ScalarType? dtype=None, Tensor(a!) out) -> Tensor(a!)
  method_prefix_derived: ''
  arguments:
  - allocate: true
    annotation: a!
    dynamic_type: Tensor
    is_nullable: false
    kwarg_only: false
    name: out
    output: true
    type: Tensor &
  - annotation: null
    dynamic_type: Tensor
    is_nullable: false
    name: self
    type: const Tensor &
  - annotation: null
    dynamic_type: int64_t
    is_nullable: false
    name: dim
    type: int64_t
  - annotation: null
    default: c10::nullopt
    dynamic_type: ScalarType
    is_nullable: true
    kwarg_only: true
    name: dtype
    type: c10::optional<ScalarType>
  method_of:
  - Type
  - namespace
  mode: native
  python_module: ''
  returns:
  - dynamic_type: Tensor
    name: out
    type: Tensor &
  inplace: false
  is_factory_method: null
  abstract: false
  requires_tensor: false
  device_guard: true
  with_gil: false
  deprecated: false
- name: cumsum
  operator_name: cumsum
  overload_name: dimname
  use_c10_dispatcher: unboxed_only
  category_override: ''
  matches_jit_signature: true
  schema_string: aten::cumsum.dimname(Tensor self, Dimname dim, *, ScalarType? dtype=None) -> Tensor
  method_prefix_derived: ''
  arguments:
  - annotation: null
    dynamic_type: Tensor
    is_nullable: false
    name: self
    type: const Tensor &
  - annotation: null
    dynamic_type: Dimname
    is_nullable: false
    name: dim
    type: Dimname
  - annotation: null
    default: c10::nullopt
    dynamic_type: ScalarType
    is_nullable: true
    kwarg_only: true
    name: dtype
    type: c10::optional<ScalarType>
  method_of:
  - Type
  - Tensor
  - namespace
  mode: native
  python_module: ''
  returns:
  - dynamic_type: Tensor
    name: result
    type: Tensor
  inplace: false
  is_factory_method: null
  abstract: false
  requires_tensor: false
  device_guard: true
  with_gil: false
  deprecated: false
- name: cumsum_out
  operator_name: cumsum
  overload_name: dimname_out
  use_c10_dispatcher: unboxed_only
  category_override: ''
  matches_jit_signature: true
  schema_string: aten::cumsum.dimname_out(Tensor self, Dimname dim, *, ScalarType? dtype=None, Tensor(a!) out) -> Tensor(a!)
  method_prefix_derived: ''
  arguments:
  - allocate: true
    annotation: a!
    dynamic_type: Tensor
    is_nullable: false
    kwarg_only: false
    name: out
    output: true
    type: Tensor &
  - annotation: null
    dynamic_type: Tensor
    is_nullable: false
    name: self
    type: const Tensor &
  - annotation: null
    dynamic_type: Dimname
    is_nullable: false
    name: dim
    type: Dimname
  - annotation: null
    default: c10::nullopt
    dynamic_type: ScalarType
    is_nullable: true
    kwarg_only: true
    name: dtype
    type: c10::optional<ScalarType>
  method_of:
  - Type
  - namespace
  mode: native
  python_module: ''
  returns:
  - dynamic_type: Tensor
    name: out
    type: Tensor &
  inplace: false
  is_factory_method: null
  abstract: false
  requires_tensor: false
  device_guard: true
  with_gil: false
  deprecated: false
- name: cumprod
  operator_name: cumprod
  overload_name: ''
  use_c10_dispatcher: unboxed_only
  category_override: ''
  matches_jit_signature: true
  schema_string: aten::cumprod(Tensor self, int dim, *, ScalarType? dtype=None) -> Tensor
  method_prefix_derived: ''
  arguments:
  - annotation: null
    dynamic_type: Tensor
    is_nullable: false
    name: self
    type: const Tensor &
  - annotation: null
    dynamic_type: int64_t
    is_nullable: false
    name: dim
    type: int64_t
  - annotation: null
    default: c10::nullopt
    dynamic_type: ScalarType
    is_nullable: true
    kwarg_only: true
    name: dtype
    type: c10::optional<ScalarType>
  method_of:
  - Type
  - Tensor
  - namespace
  mode: native
  python_module: ''
  returns:
  - dynamic_type: Tensor
    name: result
    type: Tensor
  inplace: false
  is_factory_method: null
  abstract: false
  requires_tensor: false
  device_guard: true
  with_gil: false
  deprecated: false
- name: cumprod_out
  operator_name: cumprod
  overload_name: out
  use_c10_dispatcher: unboxed_only
  category_override: ''
  matches_jit_signature: true
  schema_string: aten::cumprod.out(Tensor self, int dim, *, ScalarType? dtype=None, Tensor(a!) out) -> Tensor(a!)
  method_prefix_derived: ''
  arguments:
  - allocate: true
    annotation: a!
    dynamic_type: Tensor
    is_nullable: false
    kwarg_only: false
    name: out
    output: true
    type: Tensor &
  - annotation: null
    dynamic_type: Tensor
    is_nullable: false
    name: self
    type: const Tensor &
  - annotation: null
    dynamic_type: int64_t
    is_nullable: false
    name: dim
    type: int64_t
  - annotation: null
    default: c10::nullopt
    dynamic_type: ScalarType
    is_nullable: true
    kwarg_only: true
    name: dtype
    type: c10::optional<ScalarType>
  method_of:
  - Type
  - namespace
  mode: native
  python_module: ''
  returns:
  - dynamic_type: Tensor
    name: out
    type: Tensor &
  inplace: false
  is_factory_method: null
  abstract: false
  requires_tensor: false
  device_guard: true
  with_gil: false
  deprecated: false
- name: cumprod
  operator_name: cumprod
  overload_name: dimname
  use_c10_dispatcher: unboxed_only
  category_override: ''
  matches_jit_signature: true
  schema_string: aten::cumprod.dimname(Tensor self, Dimname dim, *, ScalarType? dtype=None) -> Tensor
  method_prefix_derived: ''
  arguments:
  - annotation: null
    dynamic_type: Tensor
    is_nullable: false
    name: self
    type: const Tensor &
  - annotation: null
    dynamic_type: Dimname
    is_nullable: false
    name: dim
    type: Dimname
  - annotation: null
    default: c10::nullopt
    dynamic_type: ScalarType
    is_nullable: true
    kwarg_only: true
    name: dtype
    type: c10::optional<ScalarType>
  method_of:
  - Type
  - Tensor
  - namespace
  mode: native
  python_module: ''
  returns:
  - dynamic_type: Tensor
    name: result
    type: Tensor
  inplace: false
  is_factory_method: null
  abstract: false
  requires_tensor: false
  device_guard: true
  with_gil: false
  deprecated: false
- name: cumprod_out
  operator_name: cumprod
  overload_name: dimname_out
  use_c10_dispatcher: unboxed_only
  category_override: ''
  matches_jit_signature: true
  schema_string: aten::cumprod.dimname_out(Tensor self, Dimname dim, *, ScalarType? dtype=None, Tensor(a!) out) -> Tensor(a!)
  method_prefix_derived: ''
  arguments:
  - allocate: true
    annotation: a!
    dynamic_type: Tensor
    is_nullable: false
    kwarg_only: false
    name: out
    output: true
    type: Tensor &
  - annotation: null
    dynamic_type: Tensor
    is_nullable: false
    name: self
    type: const Tensor &
  - annotation: null
    dynamic_type: Dimname
    is_nullable: false
    name: dim
    type: Dimname
  - annotation: null
    default: c10::nullopt
    dynamic_type: ScalarType
    is_nullable: true
    kwarg_only: true
    name: dtype
    type: c10::optional<ScalarType>
  method_of:
  - Type
  - namespace
  mode: native
  python_module: ''
  returns:
  - dynamic_type: Tensor
    name: out
    type: Tensor &
  inplace: false
  is_factory_method: null
  abstract: false
  requires_tensor: false
  device_guard: true
  with_gil: false
  deprecated: false
- name: ctc_loss
  operator_name: ctc_loss
  overload_name: IntList
  use_c10_dispatcher: unboxed_only
  category_override: ''
  matches_jit_signature: true
  schema_string: aten::ctc_loss.IntList(Tensor log_probs, Tensor targets, int[] input_lengths, int[] target_lengths, int blank=0, int reduction=Mean, bool zero_infinity=False) -> Tensor
  method_prefix_derived: ''
  arguments:
  - annotation: null
    dynamic_type: Tensor
    is_nullable: false
    name: log_probs
    type: const Tensor &
  - annotation: null
    dynamic_type: Tensor
    is_nullable: false
    name: targets
    type: const Tensor &
  - annotation: null
    dynamic_type: IntArrayRef
    is_nullable: false
    name: input_lengths
    type: IntArrayRef
  - annotation: null
    dynamic_type: IntArrayRef
    is_nullable: false
    name: target_lengths
    type: IntArrayRef
  - annotation: null
    default: 0
    dynamic_type: int64_t
    is_nullable: false
    name: blank
    type: int64_t
  - annotation: null
    default: at::Reduction::Mean
    dynamic_type: int64_t
    is_nullable: false
    name: reduction
    type: int64_t
  - annotation: null
    default: false
    dynamic_type: bool
    is_nullable: false
    name: zero_infinity
    type: bool
  method_of:
  - Type
  - namespace
  mode: native
  python_module: ''
  returns:
  - dynamic_type: Tensor
    name: result
    type: Tensor
  inplace: false
  is_factory_method: null
  abstract: false
  requires_tensor: false
  device_guard: true
  with_gil: false
  deprecated: false
- name: ctc_loss
  operator_name: ctc_loss
  overload_name: Tensor
  use_c10_dispatcher: full
  category_override: ''
  matches_jit_signature: true
  schema_string: aten::ctc_loss.Tensor(Tensor log_probs, Tensor targets, Tensor input_lengths, Tensor target_lengths, int blank=0, int reduction=Mean, bool zero_infinity=False) -> Tensor
  method_prefix_derived: ''
  arguments:
  - annotation: null
    dynamic_type: Tensor
    is_nullable: false
    name: log_probs
    type: const Tensor &
  - annotation: null
    dynamic_type: Tensor
    is_nullable: false
    name: targets
    type: const Tensor &
  - annotation: null
    dynamic_type: Tensor
    is_nullable: false
    name: input_lengths
    type: const Tensor &
  - annotation: null
    dynamic_type: Tensor
    is_nullable: false
    name: target_lengths
    type: const Tensor &
  - annotation: null
    default: 0
    dynamic_type: int64_t
    is_nullable: false
    name: blank
    type: int64_t
  - annotation: null
    default: at::Reduction::Mean
    dynamic_type: int64_t
    is_nullable: false
    name: reduction
    type: int64_t
  - annotation: null
    default: false
    dynamic_type: bool
    is_nullable: false
    name: zero_infinity
    type: bool
  method_of:
  - Type
  - namespace
  mode: native
  python_module: ''
  returns:
  - dynamic_type: Tensor
    name: result
    type: Tensor
  inplace: false
  is_factory_method: null
  abstract: false
  requires_tensor: false
  device_guard: true
  with_gil: false
  deprecated: false
- name: _ctc_loss
  operator_name: _ctc_loss
  overload_name: ''
  use_c10_dispatcher: unboxed_only
  category_override: ''
  matches_jit_signature: true
  schema_string: aten::_ctc_loss(Tensor log_probs, Tensor targets, int[] input_lengths, int[] target_lengths, int blank=0, bool zero_infinity=False) -> (Tensor, Tensor)
  method_prefix_derived: ''
  arguments:
  - annotation: null
    dynamic_type: Tensor
    is_nullable: false
    name: log_probs
    type: const Tensor &
  - annotation: null
    dynamic_type: Tensor
    is_nullable: false
    name: targets
    type: const Tensor &
  - annotation: null
    dynamic_type: IntArrayRef
    is_nullable: false
    name: input_lengths
    type: IntArrayRef
  - annotation: null
    dynamic_type: IntArrayRef
    is_nullable: false
    name: target_lengths
    type: IntArrayRef
  - annotation: null
    default: 0
    dynamic_type: int64_t
    is_nullable: false
    name: blank
    type: int64_t
  - annotation: null
    default: false
    dynamic_type: bool
    is_nullable: false
    name: zero_infinity
    type: bool
  method_of:
  - Type
  - namespace
  mode: native
  python_module: ''
  returns:
  - dynamic_type: Tensor
    name: result0
    type: Tensor
  - dynamic_type: Tensor
    name: result1
    type: Tensor
  inplace: false
  is_factory_method: null
  abstract: true
  requires_tensor: false
  device_guard: true
  with_gil: false
  deprecated: false
- name: _ctc_loss_backward
  operator_name: _ctc_loss_backward
  overload_name: ''
  use_c10_dispatcher: unboxed_only
  category_override: ''
  matches_jit_signature: true
  schema_string: aten::_ctc_loss_backward(Tensor grad, Tensor log_probs, Tensor targets, int[] input_lengths, int[] target_lengths, Tensor neg_log_likelihood, Tensor log_alpha, int blank, bool zero_infinity=False) -> Tensor
  method_prefix_derived: ''
  arguments:
  - annotation: null
    dynamic_type: Tensor
    is_nullable: false
    name: grad
    type: const Tensor &
  - annotation: null
    dynamic_type: Tensor
    is_nullable: false
    name: log_probs
    type: const Tensor &
  - annotation: null
    dynamic_type: Tensor
    is_nullable: false
    name: targets
    type: const Tensor &
  - annotation: null
    dynamic_type: IntArrayRef
    is_nullable: false
    name: input_lengths
    type: IntArrayRef
  - annotation: null
    dynamic_type: IntArrayRef
    is_nullable: false
    name: target_lengths
    type: IntArrayRef
  - annotation: null
    dynamic_type: Tensor
    is_nullable: false
    name: neg_log_likelihood
    type: const Tensor &
  - annotation: null
    dynamic_type: Tensor
    is_nullable: false
    name: log_alpha
    type: const Tensor &
  - annotation: null
    dynamic_type: int64_t
    is_nullable: false
    name: blank
    type: int64_t
  - annotation: null
    default: false
    dynamic_type: bool
    is_nullable: false
    name: zero_infinity
    type: bool
  method_of:
  - Type
  - namespace
  mode: native
  python_module: ''
  returns:
  - dynamic_type: Tensor
    name: result
    type: Tensor
  inplace: false
  is_factory_method: null
  abstract: true
  requires_tensor: false
  device_guard: true
  with_gil: false
  deprecated: false
- name: det
  operator_name: det
  overload_name: ''
  use_c10_dispatcher: full
  category_override: ''
  matches_jit_signature: true
  schema_string: aten::det(Tensor self) -> Tensor
  method_prefix_derived: ''
  arguments:
  - annotation: null
    dynamic_type: Tensor
    is_nullable: false
    name: self
    type: const Tensor &
  method_of:
  - Type
  - Tensor
  - namespace
  mode: native
  python_module: ''
  returns:
  - dynamic_type: Tensor
    name: result
    type: Tensor
  inplace: false
  is_factory_method: null
  abstract: false
  requires_tensor: false
  device_guard: true
  with_gil: false
  deprecated: false
- name: diag_embed
  operator_name: diag_embed
  overload_name: ''
  use_c10_dispatcher: full
  category_override: ''
  matches_jit_signature: true
  schema_string: aten::diag_embed(Tensor self, int offset=0, int dim1=-2, int dim2=-1) -> Tensor
  method_prefix_derived: ''
  arguments:
  - annotation: null
    dynamic_type: Tensor
    is_nullable: false
    name: self
    type: const Tensor &
  - annotation: null
    default: 0
    dynamic_type: int64_t
    is_nullable: false
    name: offset
    type: int64_t
  - annotation: null
    default: -2
    dynamic_type: int64_t
    is_nullable: false
    name: dim1
    type: int64_t
  - annotation: null
    default: -1
    dynamic_type: int64_t
    is_nullable: false
    name: dim2
    type: int64_t
  method_of:
  - Type
  - Tensor
  - namespace
  mode: native
  python_module: ''
  returns:
  - dynamic_type: Tensor
    name: result
    type: Tensor
  inplace: false
  is_factory_method: null
  abstract: false
  requires_tensor: false
  device_guard: true
  with_gil: false
  deprecated: false
- name: diagflat
  operator_name: diagflat
  overload_name: ''
  use_c10_dispatcher: full
  category_override: ''
  matches_jit_signature: true
  schema_string: aten::diagflat(Tensor self, int offset=0) -> Tensor
  method_prefix_derived: ''
  arguments:
  - annotation: null
    dynamic_type: Tensor
    is_nullable: false
    name: self
    type: const Tensor &
  - annotation: null
    default: 0
    dynamic_type: int64_t
    is_nullable: false
    name: offset
    type: int64_t
  method_of:
  - Type
  - Tensor
  - namespace
  mode: native
  python_module: ''
  returns:
  - dynamic_type: Tensor
    name: result
    type: Tensor
  inplace: false
  is_factory_method: null
  abstract: false
  requires_tensor: false
  device_guard: true
  with_gil: false
  deprecated: false
- name: diagonal
  operator_name: diagonal
  overload_name: ''
  use_c10_dispatcher: unboxed_only
  category_override: ''
  matches_jit_signature: true
  schema_string: aten::diagonal(Tensor(a) self, int offset=0, int dim1=0, int dim2=1) -> Tensor(a)
  method_prefix_derived: ''
  arguments:
  - annotation: a
    dynamic_type: Tensor
    is_nullable: false
    name: self
    type: const Tensor &
  - annotation: null
    default: 0
    dynamic_type: int64_t
    is_nullable: false
    name: offset
    type: int64_t
  - annotation: null
    default: 0
    dynamic_type: int64_t
    is_nullable: false
    name: dim1
    type: int64_t
  - annotation: null
    default: 1
    dynamic_type: int64_t
    is_nullable: false
    name: dim2
    type: int64_t
  method_of:
  - Type
  - Tensor
  - namespace
  mode: native
  python_module: ''
  returns:
  - dynamic_type: Tensor
    name: result
    type: Tensor
  inplace: false
  is_factory_method: null
  abstract: false
  requires_tensor: false
  device_guard: true
  with_gil: false
  deprecated: false
- name: fill_diagonal_
  operator_name: fill_diagonal_
  overload_name: ''
  use_c10_dispatcher: unboxed_only
  category_override: ''
  matches_jit_signature: true
  schema_string: aten::fill_diagonal_(Tensor(a!) self, Scalar fill_value, bool wrap=False) -> Tensor(a!)
  method_prefix_derived: ''
  arguments:
  - annotation: a!
    dynamic_type: Tensor
    is_nullable: false
    name: self
    type: Tensor &
  - annotation: null
    dynamic_type: Scalar
    is_nullable: false
    name: fill_value
    type: Scalar
  - annotation: null
    default: false
    dynamic_type: bool
    is_nullable: false
    name: wrap
    type: bool
  method_of:
  - Type
  - Tensor
  mode: native
  python_module: ''
  returns:
  - dynamic_type: Tensor
    name: self
    type: Tensor &
  inplace: true
  is_factory_method: null
  abstract: false
  requires_tensor: false
  device_guard: true
  with_gil: false
  deprecated: false
- name: div
  operator_name: div
  overload_name: Tensor
  use_c10_dispatcher: full
  category_override: ''
  matches_jit_signature: true
  schema_string: aten::div.Tensor(Tensor self, Tensor other) -> Tensor
  method_prefix_derived: ''
  arguments:
  - annotation: null
    dynamic_type: Tensor
    is_nullable: false
    name: self
    type: const Tensor &
  - annotation: null
    dynamic_type: Tensor
    is_nullable: false
    name: other
    type: const Tensor &
  method_of:
  - Type
  - Tensor
  - namespace
  mode: native
  python_module: ''
  returns:
  - dynamic_type: Tensor
    name: result
    type: Tensor
  inplace: false
  is_factory_method: null
  abstract: true
  requires_tensor: false
  device_guard: true
  with_gil: false
  deprecated: false
- name: div_
  operator_name: div_
  overload_name: Tensor
  use_c10_dispatcher: unboxed_only
  category_override: ''
  matches_jit_signature: true
  schema_string: aten::div_.Tensor(Tensor(a!) self, Tensor other) -> Tensor(a!)
  method_prefix_derived: ''
  arguments:
  - annotation: a!
    dynamic_type: Tensor
    is_nullable: false
    name: self
    type: Tensor &
  - annotation: null
    dynamic_type: Tensor
    is_nullable: false
    name: other
    type: const Tensor &
  method_of:
  - Type
  - Tensor
  mode: native
  python_module: ''
  returns:
  - dynamic_type: Tensor
    name: self
    type: Tensor &
  inplace: true
  is_factory_method: null
  abstract: true
  requires_tensor: false
  device_guard: true
  with_gil: false
  deprecated: false
- name: div_out
  operator_name: div
  overload_name: out
  use_c10_dispatcher: unboxed_only
  category_override: ''
  matches_jit_signature: true
  schema_string: aten::div.out(Tensor self, Tensor other, *, Tensor(a!) out) -> Tensor(a!)
  method_prefix_derived: ''
  arguments:
  - allocate: true
    annotation: a!
    dynamic_type: Tensor
    is_nullable: false
    kwarg_only: false
    name: out
    output: true
    type: Tensor &
  - annotation: null
    dynamic_type: Tensor
    is_nullable: false
    name: self
    type: const Tensor &
  - annotation: null
    dynamic_type: Tensor
    is_nullable: false
    name: other
    type: const Tensor &
  method_of:
  - Type
  - namespace
  mode: native
  python_module: ''
  returns:
  - dynamic_type: Tensor
    name: out
    type: Tensor &
  inplace: false
  is_factory_method: null
  abstract: true
  requires_tensor: false
  device_guard: true
  with_gil: false
  deprecated: false
- name: div
  operator_name: div
  overload_name: Scalar
  use_c10_dispatcher: full
  category_override: ''
  matches_jit_signature: true
  schema_string: aten::div.Scalar(Tensor self, Scalar other) -> Tensor
  method_prefix_derived: ''
  arguments:
  - annotation: null
    dynamic_type: Tensor
    is_nullable: false
    name: self
    type: const Tensor &
  - annotation: null
    dynamic_type: Scalar
    is_nullable: false
    name: other
    type: Scalar
  method_of:
  - Type
  - Tensor
  - namespace
  mode: native
  python_module: ''
  returns:
  - dynamic_type: Tensor
    name: result
    type: Tensor
  inplace: false
  is_factory_method: null
  abstract: false
  requires_tensor: false
  device_guard: true
  with_gil: false
  deprecated: false
- name: div_
  operator_name: div_
  overload_name: Scalar
  use_c10_dispatcher: unboxed_only
  category_override: ''
  matches_jit_signature: true
  schema_string: aten::div_.Scalar(Tensor(a!) self, Scalar other) -> Tensor(a!)
  method_prefix_derived: ''
  arguments:
  - annotation: a!
    dynamic_type: Tensor
    is_nullable: false
    name: self
    type: Tensor &
  - annotation: null
    dynamic_type: Scalar
    is_nullable: false
    name: other
    type: Scalar
  method_of:
  - Type
  - Tensor
  mode: native
  python_module: ''
  returns:
  - dynamic_type: Tensor
    name: self
    type: Tensor &
  inplace: true
  is_factory_method: null
  abstract: false
  requires_tensor: false
  device_guard: true
  with_gil: false
  deprecated: false
- name: dot
  operator_name: dot
  overload_name: ''
  use_c10_dispatcher: full
  category_override: ''
  matches_jit_signature: true
  schema_string: aten::dot(Tensor self, Tensor tensor) -> Tensor
  method_prefix_derived: ''
  arguments:
  - annotation: null
    dynamic_type: Tensor
    is_nullable: false
    name: self
    type: const Tensor &
  - annotation: null
    dynamic_type: Tensor
    is_nullable: false
    name: tensor
    type: const Tensor &
  method_of:
  - Type
  - Tensor
  - namespace
  mode: native
  python_module: ''
  returns:
  - dynamic_type: Tensor
    name: result
    type: Tensor
  inplace: false
  is_factory_method: null
  abstract: true
  requires_tensor: false
  device_guard: true
  with_gil: false
  deprecated: false
- name: dot_out
  operator_name: dot
  overload_name: out
  use_c10_dispatcher: unboxed_only
  category_override: ''
  matches_jit_signature: true
  schema_string: aten::dot.out(Tensor self, Tensor tensor, *, Tensor(a!) out) -> Tensor(a!)
  method_prefix_derived: ''
  arguments:
  - allocate: true
    annotation: a!
    dynamic_type: Tensor
    is_nullable: false
    kwarg_only: false
    name: out
    output: true
    type: Tensor &
  - annotation: null
    dynamic_type: Tensor
    is_nullable: false
    name: self
    type: const Tensor &
  - annotation: null
    dynamic_type: Tensor
    is_nullable: false
    name: tensor
    type: const Tensor &
  method_of:
  - Type
  - namespace
  mode: native
  python_module: ''
  returns:
  - dynamic_type: Tensor
    name: out
    type: Tensor &
  inplace: false
  is_factory_method: null
  abstract: false
  requires_tensor: false
  device_guard: true
  with_gil: false
  deprecated: false
- name: einsum
  operator_name: einsum
  overload_name: ''
  use_c10_dispatcher: unboxed_only
  category_override: ''
  matches_jit_signature: true
  schema_string: aten::einsum(str equation, Tensor[] tensors) -> Tensor
  method_prefix_derived: ''
  arguments:
  - annotation: null
    dynamic_type: std::string
    is_nullable: false
    name: equation
    type: std::string
  - annotation: null
    dynamic_type: TensorList
    is_nullable: false
    name: tensors
    type: TensorList
  method_of:
  - Type
  - namespace
  mode: native
  python_module: ''
  returns:
  - dynamic_type: Tensor
    name: result
    type: Tensor
  inplace: false
  is_factory_method: null
  abstract: false
  requires_tensor: false
  device_guard: true
  with_gil: false
  deprecated: false
- name: embedding
  operator_name: embedding
  overload_name: ''
  use_c10_dispatcher: full
  category_override: ''
  matches_jit_signature: true
  schema_string: aten::embedding(Tensor weight, Tensor indices, int padding_idx=-1, bool scale_grad_by_freq=False, bool sparse=False) -> Tensor
  method_prefix_derived: ''
  arguments:
  - annotation: null
    dynamic_type: Tensor
    is_nullable: false
    name: weight
    type: const Tensor &
  - annotation: null
    dynamic_type: Tensor
    is_nullable: false
    name: indices
    type: const Tensor &
  - annotation: null
    default: -1
    dynamic_type: int64_t
    is_nullable: false
    name: padding_idx
    type: int64_t
  - annotation: null
    default: false
    dynamic_type: bool
    is_nullable: false
    name: scale_grad_by_freq
    type: bool
  - annotation: null
    default: false
    dynamic_type: bool
    is_nullable: false
    name: sparse
    type: bool
  method_of:
  - Type
  - namespace
  mode: native
  python_module: ''
  returns:
  - dynamic_type: Tensor
    name: result
    type: Tensor
  inplace: false
  is_factory_method: null
  abstract: false
  requires_tensor: false
  device_guard: true
  with_gil: false
  deprecated: false
- name: embedding_backward
  operator_name: embedding_backward
  overload_name: ''
  use_c10_dispatcher: full
  category_override: ''
  matches_jit_signature: true
  schema_string: aten::embedding_backward(Tensor grad, Tensor indices, int num_weights, int padding_idx, bool scale_grad_by_freq, bool sparse) -> Tensor
  method_prefix_derived: ''
  arguments:
  - annotation: null
    dynamic_type: Tensor
    is_nullable: false
    name: grad
    type: const Tensor &
  - annotation: null
    dynamic_type: Tensor
    is_nullable: false
    name: indices
    type: const Tensor &
  - annotation: null
    dynamic_type: int64_t
    is_nullable: false
    name: num_weights
    type: int64_t
  - annotation: null
    dynamic_type: int64_t
    is_nullable: false
    name: padding_idx
    type: int64_t
  - annotation: null
    dynamic_type: bool
    is_nullable: false
    name: scale_grad_by_freq
    type: bool
  - annotation: null
    dynamic_type: bool
    is_nullable: false
    name: sparse
    type: bool
  method_of:
  - Type
  - namespace
  mode: native
  python_module: ''
  returns:
  - dynamic_type: Tensor
    name: result
    type: Tensor
  inplace: false
  is_factory_method: null
  abstract: false
  requires_tensor: false
  device_guard: true
  with_gil: false
  deprecated: false
- name: embedding_dense_backward
  operator_name: embedding_dense_backward
  overload_name: ''
  use_c10_dispatcher: full
  category_override: ''
  matches_jit_signature: true
  schema_string: aten::embedding_dense_backward(Tensor grad_output, Tensor indices, int num_weights, int padding_idx, bool scale_grad_by_freq) -> Tensor
  method_prefix_derived: ''
  arguments:
  - annotation: null
    dynamic_type: Tensor
    is_nullable: false
    name: grad_output
    type: const Tensor &
  - annotation: null
    dynamic_type: Tensor
    is_nullable: false
    name: indices
    type: const Tensor &
  - annotation: null
    dynamic_type: int64_t
    is_nullable: false
    name: num_weights
    type: int64_t
  - annotation: null
    dynamic_type: int64_t
    is_nullable: false
    name: padding_idx
    type: int64_t
  - annotation: null
    dynamic_type: bool
    is_nullable: false
    name: scale_grad_by_freq
    type: bool
  method_of:
  - Type
  - namespace
  mode: native
  python_module: ''
  returns:
  - dynamic_type: Tensor
    name: result
    type: Tensor
  inplace: false
  is_factory_method: null
  abstract: true
  requires_tensor: false
  device_guard: true
  with_gil: false
  deprecated: false
- name: embedding_renorm_
  operator_name: embedding_renorm_
  overload_name: ''
  use_c10_dispatcher: unboxed_only
  category_override: ''
  matches_jit_signature: true
  schema_string: aten::embedding_renorm_(Tensor(a!) self, Tensor indices, float max_norm, float norm_type) -> Tensor(a!)
  method_prefix_derived: ''
  arguments:
  - annotation: a!
    dynamic_type: Tensor
    is_nullable: false
    name: self
    type: Tensor &
  - annotation: null
    dynamic_type: Tensor
    is_nullable: false
    name: indices
    type: const Tensor &
  - annotation: null
    dynamic_type: double
    is_nullable: false
    name: max_norm
    type: double
  - annotation: null
    dynamic_type: double
    is_nullable: false
    name: norm_type
    type: double
  method_of:
  - Type
  - namespace
  mode: native
  python_module: ''
  returns:
  - dynamic_type: Tensor
    name: self
    type: Tensor &
  inplace: true
  is_factory_method: null
  abstract: true
  requires_tensor: false
  device_guard: true
  with_gil: false
  deprecated: false
- name: embedding_sparse_backward
  operator_name: embedding_sparse_backward
  overload_name: ''
  use_c10_dispatcher: full
  category_override: ''
  matches_jit_signature: true
  schema_string: aten::embedding_sparse_backward(Tensor grad, Tensor indices, int num_weights, int padding_idx, bool scale_grad_by_freq) -> Tensor
  method_prefix_derived: ''
  arguments:
  - annotation: null
    dynamic_type: Tensor
    is_nullable: false
    name: grad
    type: const Tensor &
  - annotation: null
    dynamic_type: Tensor
    is_nullable: false
    name: indices
    type: const Tensor &
  - annotation: null
    dynamic_type: int64_t
    is_nullable: false
    name: num_weights
    type: int64_t
  - annotation: null
    dynamic_type: int64_t
    is_nullable: false
    name: padding_idx
    type: int64_t
  - annotation: null
    dynamic_type: bool
    is_nullable: false
    name: scale_grad_by_freq
    type: bool
  method_of:
  - Type
  - namespace
  mode: native
  python_module: ''
  returns:
  - dynamic_type: Tensor
    name: result
    type: Tensor
  inplace: false
  is_factory_method: null
  abstract: false
  requires_tensor: false
  device_guard: true
  with_gil: false
  deprecated: false
- name: embedding_bag
  operator_name: embedding_bag
  overload_name: ''
  use_c10_dispatcher: unboxed_only
  category_override: ''
  matches_jit_signature: true
  schema_string: aten::embedding_bag(Tensor weight, Tensor indices, Tensor offsets, bool scale_grad_by_freq=False, int mode=0, bool sparse=False, Tensor? per_sample_weights=None) -> (Tensor, Tensor, Tensor, Tensor)
  method_prefix_derived: ''
  arguments:
  - annotation: null
    dynamic_type: Tensor
    is_nullable: false
    name: weight
    type: const Tensor &
  - annotation: null
    dynamic_type: Tensor
    is_nullable: false
    name: indices
    type: const Tensor &
  - annotation: null
    dynamic_type: Tensor
    is_nullable: false
    name: offsets
    type: const Tensor &
  - annotation: null
    default: false
    dynamic_type: bool
    is_nullable: false
    name: scale_grad_by_freq
    type: bool
  - annotation: null
    default: 0
    dynamic_type: int64_t
    is_nullable: false
    name: mode
    type: int64_t
  - annotation: null
    default: false
    dynamic_type: bool
    is_nullable: false
    name: sparse
    type: bool
  - annotation: null
    default: '{}'
    dynamic_type: Tensor
    is_nullable: true
    name: per_sample_weights
    type: const Tensor &
  method_of:
  - Type
  - namespace
  mode: native
  python_module: ''
  returns:
  - dynamic_type: Tensor
    name: result0
    type: Tensor
  - dynamic_type: Tensor
    name: result1
    type: Tensor
  - dynamic_type: Tensor
    name: result2
    type: Tensor
  - dynamic_type: Tensor
    name: result3
    type: Tensor
  inplace: false
  is_factory_method: null
  abstract: false
  requires_tensor: false
  device_guard: true
  with_gil: false
  deprecated: false
- name: _embedding_bag
  operator_name: _embedding_bag
  overload_name: ''
  use_c10_dispatcher: unboxed_only
  category_override: ''
  matches_jit_signature: true
  schema_string: aten::_embedding_bag(Tensor weight, Tensor indices, Tensor offsets, bool scale_grad_by_freq=False, int mode=0, bool sparse=False, Tensor? per_sample_weights=None) -> (Tensor, Tensor, Tensor, Tensor)
  method_prefix_derived: ''
  arguments:
  - annotation: null
    dynamic_type: Tensor
    is_nullable: false
    name: weight
    type: const Tensor &
  - annotation: null
    dynamic_type: Tensor
    is_nullable: false
    name: indices
    type: const Tensor &
  - annotation: null
    dynamic_type: Tensor
    is_nullable: false
    name: offsets
    type: const Tensor &
  - annotation: null
    default: false
    dynamic_type: bool
    is_nullable: false
    name: scale_grad_by_freq
    type: bool
  - annotation: null
    default: 0
    dynamic_type: int64_t
    is_nullable: false
    name: mode
    type: int64_t
  - annotation: null
    default: false
    dynamic_type: bool
    is_nullable: false
    name: sparse
    type: bool
  - annotation: null
    default: '{}'
    dynamic_type: Tensor
    is_nullable: true
    name: per_sample_weights
    type: const Tensor &
  method_of:
  - Type
  - namespace
  mode: native
  python_module: ''
  returns:
  - dynamic_type: Tensor
    name: result0
    type: Tensor
  - dynamic_type: Tensor
    name: result1
    type: Tensor
  - dynamic_type: Tensor
    name: result2
    type: Tensor
  - dynamic_type: Tensor
    name: result3
    type: Tensor
  inplace: false
  is_factory_method: null
  abstract: true
  requires_tensor: false
  device_guard: true
  with_gil: false
  deprecated: false
- name: _embedding_bag_backward
  operator_name: _embedding_bag_backward
  overload_name: ''
  use_c10_dispatcher: unboxed_only
  category_override: ''
  matches_jit_signature: true
  schema_string: aten::_embedding_bag_backward(Tensor grad, Tensor indices, Tensor offsets, Tensor offset2bag, Tensor bag_size, Tensor maximum_indices, int num_weights, bool scale_grad_by_freq, int mode, bool sparse, Tensor? per_sample_weights) -> Tensor
  method_prefix_derived: ''
  arguments:
  - annotation: null
    dynamic_type: Tensor
    is_nullable: false
    name: grad
    type: const Tensor &
  - annotation: null
    dynamic_type: Tensor
    is_nullable: false
    name: indices
    type: const Tensor &
  - annotation: null
    dynamic_type: Tensor
    is_nullable: false
    name: offsets
    type: const Tensor &
  - annotation: null
    dynamic_type: Tensor
    is_nullable: false
    name: offset2bag
    type: const Tensor &
  - annotation: null
    dynamic_type: Tensor
    is_nullable: false
    name: bag_size
    type: const Tensor &
  - annotation: null
    dynamic_type: Tensor
    is_nullable: false
    name: maximum_indices
    type: const Tensor &
  - annotation: null
    dynamic_type: int64_t
    is_nullable: false
    name: num_weights
    type: int64_t
  - annotation: null
    dynamic_type: bool
    is_nullable: false
    name: scale_grad_by_freq
    type: bool
  - annotation: null
    dynamic_type: int64_t
    is_nullable: false
    name: mode
    type: int64_t
  - annotation: null
    dynamic_type: bool
    is_nullable: false
    name: sparse
    type: bool
  - annotation: null
    dynamic_type: Tensor
    is_nullable: true
    name: per_sample_weights
    type: const Tensor &
  method_of:
  - Type
  - namespace
  mode: native
  python_module: ''
  returns:
  - dynamic_type: Tensor
    name: result
    type: Tensor
  inplace: false
  is_factory_method: null
  abstract: false
  requires_tensor: false
  device_guard: true
  with_gil: false
  deprecated: false
- name: _embedding_bag_sparse_backward
  operator_name: _embedding_bag_sparse_backward
  overload_name: ''
  use_c10_dispatcher: unboxed_only
  category_override: ''
  matches_jit_signature: true
  schema_string: aten::_embedding_bag_sparse_backward(Tensor grad, Tensor indices, Tensor offsets, Tensor offset2bag, Tensor bag_size, int num_weights, bool scale_grad_by_freq, int mode, Tensor? per_sample_weights) -> Tensor
  method_prefix_derived: ''
  arguments:
  - annotation: null
    dynamic_type: Tensor
    is_nullable: false
    name: grad
    type: const Tensor &
  - annotation: null
    dynamic_type: Tensor
    is_nullable: false
    name: indices
    type: const Tensor &
  - annotation: null
    dynamic_type: Tensor
    is_nullable: false
    name: offsets
    type: const Tensor &
  - annotation: null
    dynamic_type: Tensor
    is_nullable: false
    name: offset2bag
    type: const Tensor &
  - annotation: null
    dynamic_type: Tensor
    is_nullable: false
    name: bag_size
    type: const Tensor &
  - annotation: null
    dynamic_type: int64_t
    is_nullable: false
    name: num_weights
    type: int64_t
  - annotation: null
    dynamic_type: bool
    is_nullable: false
    name: scale_grad_by_freq
    type: bool
  - annotation: null
    dynamic_type: int64_t
    is_nullable: false
    name: mode
    type: int64_t
  - annotation: null
    dynamic_type: Tensor
    is_nullable: true
    name: per_sample_weights
    type: const Tensor &
  method_of:
  - Type
  - namespace
  mode: native
  python_module: ''
  returns:
  - dynamic_type: Tensor
    name: result
    type: Tensor
  inplace: false
  is_factory_method: null
  abstract: false
  requires_tensor: false
  device_guard: true
  with_gil: false
  deprecated: false
- name: _embedding_bag_dense_backward
  operator_name: _embedding_bag_dense_backward
  overload_name: ''
  use_c10_dispatcher: unboxed_only
  category_override: ''
  matches_jit_signature: true
  schema_string: aten::_embedding_bag_dense_backward(Tensor grad, Tensor indices, Tensor offsets, Tensor offset2bag, Tensor bag_size, Tensor maximum_indices, int num_weights, bool scale_grad_by_freq, int mode, Tensor? per_sample_weights) -> Tensor
  method_prefix_derived: ''
  arguments:
  - annotation: null
    dynamic_type: Tensor
    is_nullable: false
    name: grad
    type: const Tensor &
  - annotation: null
    dynamic_type: Tensor
    is_nullable: false
    name: indices
    type: const Tensor &
  - annotation: null
    dynamic_type: Tensor
    is_nullable: false
    name: offsets
    type: const Tensor &
  - annotation: null
    dynamic_type: Tensor
    is_nullable: false
    name: offset2bag
    type: const Tensor &
  - annotation: null
    dynamic_type: Tensor
    is_nullable: false
    name: bag_size
    type: const Tensor &
  - annotation: null
    dynamic_type: Tensor
    is_nullable: false
    name: maximum_indices
    type: const Tensor &
  - annotation: null
    dynamic_type: int64_t
    is_nullable: false
    name: num_weights
    type: int64_t
  - annotation: null
    dynamic_type: bool
    is_nullable: false
    name: scale_grad_by_freq
    type: bool
  - annotation: null
    dynamic_type: int64_t
    is_nullable: false
    name: mode
    type: int64_t
  - annotation: null
    dynamic_type: Tensor
    is_nullable: true
    name: per_sample_weights
    type: const Tensor &
  method_of:
  - Type
  - namespace
  mode: native
  python_module: ''
  returns:
  - dynamic_type: Tensor
    name: result
    type: Tensor
  inplace: false
  is_factory_method: null
  abstract: true
  requires_tensor: false
  device_guard: true
  with_gil: false
  deprecated: false
- name: _embedding_bag_per_sample_weights_backward
  operator_name: _embedding_bag_per_sample_weights_backward
  overload_name: ''
  use_c10_dispatcher: full
  category_override: ''
  matches_jit_signature: true
  schema_string: aten::_embedding_bag_per_sample_weights_backward(Tensor grad, Tensor weight, Tensor indices, Tensor offsets, Tensor offset2bag, int mode) -> Tensor
  method_prefix_derived: ''
  arguments:
  - annotation: null
    dynamic_type: Tensor
    is_nullable: false
    name: grad
    type: const Tensor &
  - annotation: null
    dynamic_type: Tensor
    is_nullable: false
    name: weight
    type: const Tensor &
  - annotation: null
    dynamic_type: Tensor
    is_nullable: false
    name: indices
    type: const Tensor &
  - annotation: null
    dynamic_type: Tensor
    is_nullable: false
    name: offsets
    type: const Tensor &
  - annotation: null
    dynamic_type: Tensor
    is_nullable: false
    name: offset2bag
    type: const Tensor &
  - annotation: null
    dynamic_type: int64_t
    is_nullable: false
    name: mode
    type: int64_t
  method_of:
  - Type
  - namespace
  mode: native
  python_module: ''
  returns:
  - dynamic_type: Tensor
    name: result
    type: Tensor
  inplace: false
  is_factory_method: null
  abstract: true
  requires_tensor: false
  device_guard: true
  with_gil: false
  deprecated: false
- name: empty
  operator_name: empty
  overload_name: names
  use_c10_dispatcher: unboxed_only
  category_override: ''
  matches_jit_signature: true
  schema_string: aten::empty.names(int[] size, *, Dimname[]? names, ScalarType? dtype=None, Layout? layout=None, Device? device=None, bool? pin_memory=None, MemoryFormat? memory_format=None) -> Tensor
  method_prefix_derived: ''
  arguments:
  - annotation: null
    dynamic_type: IntArrayRef
    is_nullable: false
    name: size
    type: IntArrayRef
  - annotation: null
    dynamic_type: DimnameList
    is_nullable: true
    kwarg_only: true
    name: names
    type: c10::optional<DimnameList>
  - annotation: null
    default: '{}'
    dynamic_type: TensorOptions
    is_nullable: false
    kwarg_only: true
    name: options
    type: const TensorOptions &
  - annotation: null
    default: c10::nullopt
    dynamic_type: MemoryFormat
    is_nullable: true
    kwarg_only: true
    name: memory_format
    type: c10::optional<MemoryFormat>
  method_of:
  - Type
  - namespace
  mode: native
  python_module: ''
  returns:
  - dynamic_type: Tensor
    name: result
    type: Tensor
  inplace: false
  is_factory_method: true
  abstract: false
  requires_tensor: false
  device_guard: false
  with_gil: false
  deprecated: false
- name: empty
  operator_name: empty
  overload_name: memory_format
  use_c10_dispatcher: unboxed_only
  category_override: ''
  matches_jit_signature: true
  schema_string: aten::empty.memory_format(int[] size, *, ScalarType? dtype=None, Layout? layout=None, Device? device=None, bool? pin_memory=None, MemoryFormat? memory_format=None) -> Tensor
  method_prefix_derived: ''
  arguments:
  - annotation: null
    dynamic_type: IntArrayRef
    is_nullable: false
    name: size
    type: IntArrayRef
  - annotation: null
    default: '{}'
    dynamic_type: TensorOptions
    is_nullable: false
    kwarg_only: true
    name: options
    type: const TensorOptions &
  - annotation: null
    default: c10::nullopt
    dynamic_type: MemoryFormat
    is_nullable: true
    kwarg_only: true
    name: memory_format
    type: c10::optional<MemoryFormat>
  method_of:
  - Type
  - namespace
  mode: native
  python_module: ''
  returns:
  - dynamic_type: Tensor
    name: result
    type: Tensor
  inplace: false
  is_factory_method: true
  abstract: true
  requires_tensor: false
  device_guard: true
  with_gil: false
  deprecated: false
- name: new_empty
  operator_name: new_empty
  overload_name: ''
  use_c10_dispatcher: unboxed_only
  category_override: ''
  matches_jit_signature: true
  schema_string: aten::new_empty(Tensor self, int[] size, *, ScalarType? dtype=None, Layout? layout=None, Device? device=None, bool? pin_memory=None) -> Tensor
  method_prefix_derived: ''
  arguments:
  - annotation: null
    dynamic_type: Tensor
    is_nullable: false
    name: self
    type: const Tensor &
  - annotation: null
    dynamic_type: IntArrayRef
    is_nullable: false
    name: size
    type: IntArrayRef
  - annotation: null
    default: '{}'
    dynamic_type: TensorOptions
    is_nullable: false
    kwarg_only: true
    name: options
    type: const TensorOptions &
  method_of:
  - Type
  - Tensor
  mode: native
  python_module: ''
  returns:
  - dynamic_type: Tensor
    name: result
    type: Tensor
  inplace: false
  is_factory_method: false
  abstract: false
  requires_tensor: false
  device_guard: true
  with_gil: false
  deprecated: false
- name: new_full
  operator_name: new_full
  overload_name: ''
  use_c10_dispatcher: unboxed_only
  category_override: ''
  matches_jit_signature: true
  schema_string: aten::new_full(Tensor self, int[] size, Scalar fill_value, *, ScalarType? dtype=None, Layout? layout=None, Device? device=None, bool? pin_memory=None) -> Tensor
  method_prefix_derived: ''
  arguments:
  - annotation: null
    dynamic_type: Tensor
    is_nullable: false
    name: self
    type: const Tensor &
  - annotation: null
    dynamic_type: IntArrayRef
    is_nullable: false
    name: size
    type: IntArrayRef
  - annotation: null
    dynamic_type: Scalar
    is_nullable: false
    name: fill_value
    type: Scalar
  - annotation: null
    default: '{}'
    dynamic_type: TensorOptions
    is_nullable: false
    kwarg_only: true
    name: options
    type: const TensorOptions &
  method_of:
  - Type
  - Tensor
  mode: native
  python_module: ''
  returns:
  - dynamic_type: Tensor
    name: result
    type: Tensor
  inplace: false
  is_factory_method: false
  abstract: false
  requires_tensor: false
  device_guard: true
  with_gil: false
  deprecated: false
- name: new_zeros
  operator_name: new_zeros
  overload_name: ''
  use_c10_dispatcher: unboxed_only
  category_override: ''
  matches_jit_signature: true
  schema_string: aten::new_zeros(Tensor self, int[] size, *, ScalarType? dtype=None, Layout? layout=None, Device? device=None, bool? pin_memory=None) -> Tensor
  method_prefix_derived: ''
  arguments:
  - annotation: null
    dynamic_type: Tensor
    is_nullable: false
    name: self
    type: const Tensor &
  - annotation: null
    dynamic_type: IntArrayRef
    is_nullable: false
    name: size
    type: IntArrayRef
  - annotation: null
    default: '{}'
    dynamic_type: TensorOptions
    is_nullable: false
    kwarg_only: true
    name: options
    type: const TensorOptions &
  method_of:
  - Type
  - Tensor
  mode: native
  python_module: ''
  returns:
  - dynamic_type: Tensor
    name: result
    type: Tensor
  inplace: false
  is_factory_method: false
  abstract: false
  requires_tensor: false
  device_guard: true
  with_gil: false
  deprecated: false
- name: _empty_affine_quantized
  operator_name: _empty_affine_quantized
  overload_name: ''
  use_c10_dispatcher: unboxed_only
  category_override: ''
  matches_jit_signature: true
  schema_string: aten::_empty_affine_quantized(int[] size, *, ScalarType? dtype=None, Layout? layout=None, Device? device=None, bool? pin_memory=None, float scale=1, int zero_point=0, MemoryFormat? memory_format=contiguous_format) -> Tensor
  method_prefix_derived: ''
  arguments:
  - annotation: null
    dynamic_type: IntArrayRef
    is_nullable: false
    name: size
    type: IntArrayRef
  - annotation: null
    default: '{}'
    dynamic_type: TensorOptions
    is_nullable: false
    kwarg_only: true
    name: options
    type: const TensorOptions &
  - annotation: null
    default: 1
    dynamic_type: double
    is_nullable: false
    kwarg_only: true
    name: scale
    type: double
  - annotation: null
    default: 0
    dynamic_type: int64_t
    is_nullable: false
    kwarg_only: true
    name: zero_point
    type: int64_t
  - annotation: null
    default: MemoryFormat::Contiguous
    dynamic_type: MemoryFormat
    is_nullable: true
    kwarg_only: true
    name: memory_format
    type: c10::optional<MemoryFormat>
  method_of:
  - Type
  - namespace
  mode: native
  python_module: ''
  returns:
  - dynamic_type: Tensor
    name: result
    type: Tensor
  inplace: false
  is_factory_method: true
  abstract: true
  requires_tensor: false
  device_guard: true
  with_gil: false
  deprecated: false
- name: _empty_per_channel_affine_quantized
  operator_name: _empty_per_channel_affine_quantized
  overload_name: ''
  use_c10_dispatcher: unboxed_only
  category_override: factory
  matches_jit_signature: true
  schema_string: aten::_empty_per_channel_affine_quantized(int[] size, *, Tensor scales, Tensor zero_points, int axis, ScalarType? dtype=None, Layout? layout=None, Device? device=None, bool? pin_memory=None, MemoryFormat? memory_format=contiguous_format) -> Tensor
  method_prefix_derived: ''
  arguments:
  - annotation: null
    dynamic_type: IntArrayRef
    is_nullable: false
    name: size
    type: IntArrayRef
  - annotation: null
    dynamic_type: Tensor
    is_nullable: false
    kwarg_only: true
    name: scales
    type: const Tensor &
  - annotation: null
    dynamic_type: Tensor
    is_nullable: false
    kwarg_only: true
    name: zero_points
    type: const Tensor &
  - annotation: null
    dynamic_type: int64_t
    is_nullable: false
    kwarg_only: true
    name: axis
    type: int64_t
  - annotation: null
    default: '{}'
    dynamic_type: TensorOptions
    is_nullable: false
    kwarg_only: true
    name: options
    type: const TensorOptions &
  - annotation: null
    default: MemoryFormat::Contiguous
    dynamic_type: MemoryFormat
    is_nullable: true
    kwarg_only: true
    name: memory_format
    type: c10::optional<MemoryFormat>
  method_of:
  - Type
  - namespace
  mode: native
  python_module: ''
  returns:
  - dynamic_type: Tensor
    name: result
    type: Tensor
  inplace: false
  is_factory_method: true
  abstract: true
  requires_tensor: false
  device_guard: true
  with_gil: false
  deprecated: false
- name: resize_
  operator_name: resize_
  overload_name: ''
  use_c10_dispatcher: unboxed_only
  category_override: ''
  matches_jit_signature: true
  schema_string: aten::resize_(Tensor(a!) self, int[] size, *, MemoryFormat? memory_format=None) -> Tensor(a!)
  method_prefix_derived: ''
  arguments:
  - annotation: a!
    dynamic_type: Tensor
    is_nullable: false
    name: self
    type: Tensor &
  - annotation: null
    dynamic_type: IntArrayRef
    is_nullable: false
    name: size
    type: IntArrayRef
  - annotation: null
    default: c10::nullopt
    dynamic_type: MemoryFormat
    is_nullable: true
    kwarg_only: true
    name: memory_format
    type: c10::optional<MemoryFormat>
  method_of:
  - Type
  - Tensor
  mode: native
  python_module: ''
  returns:
  - dynamic_type: Tensor
    name: self
    type: Tensor &
  inplace: true
  is_factory_method: null
  abstract: true
  requires_tensor: false
  device_guard: false
  with_gil: false
  deprecated: false
- name: empty_out
  operator_name: empty
  overload_name: out
  use_c10_dispatcher: unboxed_only
  category_override: ''
  matches_jit_signature: true
  schema_string: aten::empty.out(int[] size, *, MemoryFormat? memory_format=None, Tensor(a!) out) -> Tensor(a!)
  method_prefix_derived: ''
  arguments:
  - allocate: true
    annotation: a!
    dynamic_type: Tensor
    is_nullable: false
    kwarg_only: false
    name: out
    output: true
    type: Tensor &
  - annotation: null
    dynamic_type: IntArrayRef
    is_nullable: false
    name: size
    type: IntArrayRef
  - annotation: null
    default: c10::nullopt
    dynamic_type: MemoryFormat
    is_nullable: true
    kwarg_only: true
    name: memory_format
    type: c10::optional<MemoryFormat>
  method_of:
  - Type
  - namespace
  mode: native
  python_module: ''
  returns:
  - dynamic_type: Tensor
    name: out
    type: Tensor &
  inplace: false
  is_factory_method: null
  abstract: false
  requires_tensor: false
  device_guard: false
  with_gil: false
  deprecated: false
- name: empty_like
  operator_name: empty_like
  overload_name: ''
  use_c10_dispatcher: unboxed_only
  category_override: ''
  matches_jit_signature: true
  schema_string: aten::empty_like(Tensor self, *, MemoryFormat? memory_format=None) -> Tensor
  method_prefix_derived: ''
  arguments:
  - annotation: null
    dynamic_type: Tensor
    is_nullable: false
    name: self
    type: const Tensor &
  - annotation: null
    default: c10::nullopt
    dynamic_type: MemoryFormat
    is_nullable: true
    kwarg_only: true
    name: memory_format
    type: c10::optional<MemoryFormat>
  method_of:
  - Type
  - namespace
  mode: native
  python_module: ''
  returns:
  - dynamic_type: Tensor
    name: result
    type: Tensor
  inplace: false
  is_factory_method: null
  abstract: false
  requires_tensor: false
  device_guard: false
  with_gil: false
  deprecated: false
- name: empty_like
  operator_name: empty_like
  overload_name: dtype
  use_c10_dispatcher: unboxed_only
  category_override: ''
  matches_jit_signature: true
  schema_string: aten::empty_like.dtype(Tensor self, *, ScalarType dtype, Layout layout, Device device, bool pin_memory=False, MemoryFormat? memory_format=None) -> Tensor
  method_prefix_derived: ''
  arguments:
  - annotation: null
    dynamic_type: Tensor
    is_nullable: false
    name: self
    type: const Tensor &
  - annotation: null
    dynamic_type: TensorOptions
    is_nullable: false
    kwarg_only: true
    name: options
    type: const TensorOptions &
  - annotation: null
    default: c10::nullopt
    dynamic_type: MemoryFormat
    is_nullable: true
    kwarg_only: true
    name: memory_format
    type: c10::optional<MemoryFormat>
  method_of:
  - Type
  - namespace
  mode: native
  python_module: ''
  returns:
  - dynamic_type: Tensor
    name: result
    type: Tensor
  inplace: false
  is_factory_method: true
  abstract: false
  requires_tensor: false
  device_guard: false
  with_gil: false
  deprecated: false
- name: empty_strided
  operator_name: empty_strided
  overload_name: ''
  use_c10_dispatcher: unboxed_only
  category_override: ''
  matches_jit_signature: true
  schema_string: aten::empty_strided(int[] size, int[] stride, *, ScalarType? dtype=None, Layout? layout=None, Device? device=None, bool? pin_memory=None) -> Tensor
  method_prefix_derived: ''
  arguments:
  - annotation: null
    dynamic_type: IntArrayRef
    is_nullable: false
    name: size
    type: IntArrayRef
  - annotation: null
    dynamic_type: IntArrayRef
    is_nullable: false
    name: stride
    type: IntArrayRef
  - annotation: null
    default: '{}'
    dynamic_type: TensorOptions
    is_nullable: false
    kwarg_only: true
    name: options
    type: const TensorOptions &
  method_of:
  - Type
  - namespace
  mode: native
  python_module: ''
  returns:
  - dynamic_type: Tensor
    name: result
    type: Tensor
  inplace: false
  is_factory_method: true
  abstract: true
  requires_tensor: false
  device_guard: true
  with_gil: false
  deprecated: false
- name: erf
  operator_name: erf
  overload_name: ''
  use_c10_dispatcher: full
  category_override: ''
  matches_jit_signature: true
  schema_string: aten::erf(Tensor self) -> Tensor
  method_prefix_derived: ''
  arguments:
  - annotation: null
    dynamic_type: Tensor
    is_nullable: false
    name: self
    type: const Tensor &
  method_of:
  - Type
  - Tensor
  - namespace
  mode: native
  python_module: ''
  returns:
  - dynamic_type: Tensor
    name: result
    type: Tensor
  inplace: false
  is_factory_method: null
  abstract: false
  requires_tensor: false
  device_guard: true
  with_gil: false
  deprecated: false
- name: erf_
  operator_name: erf_
  overload_name: ''
  use_c10_dispatcher: unboxed_only
  category_override: ''
  matches_jit_signature: true
  schema_string: aten::erf_(Tensor(a!) self) -> Tensor(a!)
  method_prefix_derived: ''
  arguments:
  - annotation: a!
    dynamic_type: Tensor
    is_nullable: false
    name: self
    type: Tensor &
  method_of:
  - Type
  - Tensor
  - namespace
  mode: native
  python_module: ''
  returns:
  - dynamic_type: Tensor
    name: self
    type: Tensor &
  inplace: true
  is_factory_method: null
  abstract: true
  requires_tensor: false
  device_guard: true
  with_gil: false
  deprecated: false
- name: erf_out
  operator_name: erf
  overload_name: out
  use_c10_dispatcher: unboxed_only
  category_override: ''
  matches_jit_signature: true
  schema_string: aten::erf.out(Tensor self, *, Tensor(a!) out) -> Tensor(a!)
  method_prefix_derived: ''
  arguments:
  - allocate: true
    annotation: a!
    dynamic_type: Tensor
    is_nullable: false
    kwarg_only: false
    name: out
    output: true
    type: Tensor &
  - annotation: null
    dynamic_type: Tensor
    is_nullable: false
    name: self
    type: const Tensor &
  method_of:
  - Type
  - namespace
  mode: native
  python_module: ''
  returns:
  - dynamic_type: Tensor
    name: out
    type: Tensor &
  inplace: false
  is_factory_method: null
  abstract: true
  requires_tensor: false
  device_guard: true
  with_gil: false
  deprecated: false
- name: erfc
  operator_name: erfc
  overload_name: ''
  use_c10_dispatcher: full
  category_override: ''
  matches_jit_signature: true
  schema_string: aten::erfc(Tensor self) -> Tensor
  method_prefix_derived: ''
  arguments:
  - annotation: null
    dynamic_type: Tensor
    is_nullable: false
    name: self
    type: const Tensor &
  method_of:
  - Type
  - Tensor
  - namespace
  mode: native
  python_module: ''
  returns:
  - dynamic_type: Tensor
    name: result
    type: Tensor
  inplace: false
  is_factory_method: null
  abstract: false
  requires_tensor: false
  device_guard: true
  with_gil: false
  deprecated: false
- name: erfc_
  operator_name: erfc_
  overload_name: ''
  use_c10_dispatcher: unboxed_only
  category_override: ''
  matches_jit_signature: true
  schema_string: aten::erfc_(Tensor(a!) self) -> Tensor(a!)
  method_prefix_derived: ''
  arguments:
  - annotation: a!
    dynamic_type: Tensor
    is_nullable: false
    name: self
    type: Tensor &
  method_of:
  - Type
  - Tensor
  - namespace
  mode: native
  python_module: ''
  returns:
  - dynamic_type: Tensor
    name: self
    type: Tensor &
  inplace: true
  is_factory_method: null
  abstract: true
  requires_tensor: false
  device_guard: true
  with_gil: false
  deprecated: false
- name: erfc_out
  operator_name: erfc
  overload_name: out
  use_c10_dispatcher: unboxed_only
  category_override: ''
  matches_jit_signature: true
  schema_string: aten::erfc.out(Tensor self, *, Tensor(a!) out) -> Tensor(a!)
  method_prefix_derived: ''
  arguments:
  - allocate: true
    annotation: a!
    dynamic_type: Tensor
    is_nullable: false
    kwarg_only: false
    name: out
    output: true
    type: Tensor &
  - annotation: null
    dynamic_type: Tensor
    is_nullable: false
    name: self
    type: const Tensor &
  method_of:
  - Type
  - namespace
  mode: native
  python_module: ''
  returns:
  - dynamic_type: Tensor
    name: out
    type: Tensor &
  inplace: false
  is_factory_method: null
  abstract: true
  requires_tensor: false
  device_guard: true
  with_gil: false
  deprecated: false
- name: exp
  operator_name: exp
  overload_name: ''
  use_c10_dispatcher: full
  category_override: ''
  matches_jit_signature: true
  schema_string: aten::exp(Tensor self) -> Tensor
  method_prefix_derived: ''
  arguments:
  - annotation: null
    dynamic_type: Tensor
    is_nullable: false
    name: self
    type: const Tensor &
  method_of:
  - Type
  - Tensor
  - namespace
  mode: native
  python_module: ''
  returns:
  - dynamic_type: Tensor
    name: result
    type: Tensor
  inplace: false
  is_factory_method: null
  abstract: false
  requires_tensor: false
  device_guard: true
  with_gil: false
  deprecated: false
- name: exp_
  operator_name: exp_
  overload_name: ''
  use_c10_dispatcher: unboxed_only
  category_override: ''
  matches_jit_signature: true
  schema_string: aten::exp_(Tensor(a!) self) -> Tensor(a!)
  method_prefix_derived: ''
  arguments:
  - annotation: a!
    dynamic_type: Tensor
    is_nullable: false
    name: self
    type: Tensor &
  method_of:
  - Type
  - Tensor
  - namespace
  mode: native
  python_module: ''
  returns:
  - dynamic_type: Tensor
    name: self
    type: Tensor &
  inplace: true
  is_factory_method: null
  abstract: true
  requires_tensor: false
  device_guard: true
  with_gil: false
  deprecated: false
- name: exp_out
  operator_name: exp
  overload_name: out
  use_c10_dispatcher: unboxed_only
  category_override: ''
  matches_jit_signature: true
  schema_string: aten::exp.out(Tensor self, *, Tensor(a!) out) -> Tensor(a!)
  method_prefix_derived: ''
  arguments:
  - allocate: true
    annotation: a!
    dynamic_type: Tensor
    is_nullable: false
    kwarg_only: false
    name: out
    output: true
    type: Tensor &
  - annotation: null
    dynamic_type: Tensor
    is_nullable: false
    name: self
    type: const Tensor &
  method_of:
  - Type
  - namespace
  mode: native
  python_module: ''
  returns:
  - dynamic_type: Tensor
    name: out
    type: Tensor &
  inplace: false
  is_factory_method: null
  abstract: true
  requires_tensor: false
  device_guard: true
  with_gil: false
  deprecated: false
- name: expm1
  operator_name: expm1
  overload_name: ''
  use_c10_dispatcher: full
  category_override: ''
  matches_jit_signature: true
  schema_string: aten::expm1(Tensor self) -> Tensor
  method_prefix_derived: ''
  arguments:
  - annotation: null
    dynamic_type: Tensor
    is_nullable: false
    name: self
    type: const Tensor &
  method_of:
  - Type
  - Tensor
  - namespace
  mode: native
  python_module: ''
  returns:
  - dynamic_type: Tensor
    name: result
    type: Tensor
  inplace: false
  is_factory_method: null
  abstract: false
  requires_tensor: false
  device_guard: true
  with_gil: false
  deprecated: false
- name: expm1_
  operator_name: expm1_
  overload_name: ''
  use_c10_dispatcher: unboxed_only
  category_override: ''
  matches_jit_signature: true
  schema_string: aten::expm1_(Tensor(a!) self) -> Tensor(a!)
  method_prefix_derived: ''
  arguments:
  - annotation: a!
    dynamic_type: Tensor
    is_nullable: false
    name: self
    type: Tensor &
  method_of:
  - Type
  - Tensor
  - namespace
  mode: native
  python_module: ''
  returns:
  - dynamic_type: Tensor
    name: self
    type: Tensor &
  inplace: true
  is_factory_method: null
  abstract: false
  requires_tensor: false
  device_guard: true
  with_gil: false
  deprecated: false
- name: expm1_out
  operator_name: expm1
  overload_name: out
  use_c10_dispatcher: unboxed_only
  category_override: ''
  matches_jit_signature: true
  schema_string: aten::expm1.out(Tensor self, *, Tensor(a!) out) -> Tensor(a!)
  method_prefix_derived: ''
  arguments:
  - allocate: true
    annotation: a!
    dynamic_type: Tensor
    is_nullable: false
    kwarg_only: false
    name: out
    output: true
    type: Tensor &
  - annotation: null
    dynamic_type: Tensor
    is_nullable: false
    name: self
    type: const Tensor &
  method_of:
  - Type
  - namespace
  mode: native
  python_module: ''
  returns:
  - dynamic_type: Tensor
    name: out
    type: Tensor &
  inplace: false
  is_factory_method: null
  abstract: true
  requires_tensor: false
  device_guard: true
  with_gil: false
  deprecated: false
- name: expand
  operator_name: expand
  overload_name: ''
  use_c10_dispatcher: unboxed_only
  category_override: ''
  matches_jit_signature: true
  schema_string: aten::expand(Tensor(a) self, int[] size, *, bool implicit=False) -> Tensor(a)
  method_prefix_derived: ''
  arguments:
  - annotation: a
    dynamic_type: Tensor
    is_nullable: false
    name: self
    type: const Tensor &
  - annotation: null
    dynamic_type: IntArrayRef
    is_nullable: false
    name: size
    type: IntArrayRef
  - annotation: null
    default: false
    dynamic_type: bool
    is_nullable: false
    kwarg_only: true
    name: implicit
    type: bool
  method_of:
  - Type
  - Tensor
  mode: native
  python_module: ''
  returns:
  - dynamic_type: Tensor
    name: result
    type: Tensor
  inplace: false
  is_factory_method: null
  abstract: false
  requires_tensor: false
  device_guard: false
  with_gil: false
  deprecated: false
- name: expand_as
  operator_name: expand_as
  overload_name: ''
  use_c10_dispatcher: full
  category_override: ''
  matches_jit_signature: true
  schema_string: aten::expand_as(Tensor self, Tensor other) -> Tensor
  method_prefix_derived: ''
  arguments:
  - annotation: null
    dynamic_type: Tensor
    is_nullable: false
    name: self
    type: const Tensor &
  - annotation: null
    dynamic_type: Tensor
    is_nullable: false
    name: other
    type: const Tensor &
  method_of:
  - Type
  - Tensor
  mode: native
  python_module: ''
  returns:
  - dynamic_type: Tensor
    name: result
    type: Tensor
  inplace: false
  is_factory_method: null
  abstract: false
  requires_tensor: false
  device_guard: false
  with_gil: false
  deprecated: false
- name: eye
  operator_name: eye
  overload_name: ''
  use_c10_dispatcher: unboxed_only
  category_override: ''
  matches_jit_signature: true
  schema_string: aten::eye(int n, *, ScalarType? dtype=None, Layout? layout=None, Device? device=None, bool? pin_memory=None) -> Tensor
  method_prefix_derived: ''
  arguments:
  - annotation: null
    dynamic_type: int64_t
    is_nullable: false
    name: n
    type: int64_t
  - annotation: null
    default: '{}'
    dynamic_type: TensorOptions
    is_nullable: false
    kwarg_only: true
    name: options
    type: const TensorOptions &
  method_of:
  - Type
  - namespace
  mode: native
  python_module: ''
  returns:
  - dynamic_type: Tensor
    name: result
    type: Tensor
  inplace: false
  is_factory_method: true
  abstract: false
  requires_tensor: false
  device_guard: true
  with_gil: false
  deprecated: false
- name: eye
  operator_name: eye
  overload_name: m
  use_c10_dispatcher: unboxed_only
  category_override: ''
  matches_jit_signature: true
  schema_string: aten::eye.m(int n, int m, *, ScalarType? dtype=None, Layout? layout=None, Device? device=None, bool? pin_memory=None) -> Tensor
  method_prefix_derived: ''
  arguments:
  - annotation: null
    dynamic_type: int64_t
    is_nullable: false
    name: n
    type: int64_t
  - annotation: null
    dynamic_type: int64_t
    is_nullable: false
    name: m
    type: int64_t
  - annotation: null
    default: '{}'
    dynamic_type: TensorOptions
    is_nullable: false
    kwarg_only: true
    name: options
    type: const TensorOptions &
  method_of:
  - Type
  - namespace
  mode: native
  python_module: ''
  returns:
  - dynamic_type: Tensor
    name: result
    type: Tensor
  inplace: false
  is_factory_method: true
  abstract: false
  requires_tensor: false
  device_guard: true
  with_gil: false
  deprecated: false
- name: eye_out
  operator_name: eye
  overload_name: out
  use_c10_dispatcher: unboxed_only
  category_override: ''
  matches_jit_signature: true
  schema_string: aten::eye.out(int n, *, Tensor(a!) out) -> Tensor(a!)
  method_prefix_derived: ''
  arguments:
  - allocate: true
    annotation: a!
    dynamic_type: Tensor
    is_nullable: false
    kwarg_only: false
    name: out
    output: true
    type: Tensor &
  - annotation: null
    dynamic_type: int64_t
    is_nullable: false
    name: n
    type: int64_t
  method_of:
  - Type
  - namespace
  mode: native
  python_module: ''
  returns:
  - dynamic_type: Tensor
    name: out
    type: Tensor &
  inplace: false
  is_factory_method: null
  abstract: true
  requires_tensor: false
  device_guard: true
  with_gil: false
  deprecated: false
- name: eye_out
  operator_name: eye
  overload_name: m_out
  use_c10_dispatcher: unboxed_only
  category_override: ''
  matches_jit_signature: true
  schema_string: aten::eye.m_out(int n, int m, *, Tensor(a!) out) -> Tensor(a!)
  method_prefix_derived: ''
  arguments:
  - allocate: true
    annotation: a!
    dynamic_type: Tensor
    is_nullable: false
    kwarg_only: false
    name: out
    output: true
    type: Tensor &
  - annotation: null
    dynamic_type: int64_t
    is_nullable: false
    name: n
    type: int64_t
  - annotation: null
    dynamic_type: int64_t
    is_nullable: false
    name: m
    type: int64_t
  method_of:
  - Type
  - namespace
  mode: native
  python_module: ''
  returns:
  - dynamic_type: Tensor
    name: out
    type: Tensor &
  inplace: false
  is_factory_method: null
  abstract: true
  requires_tensor: false
  device_guard: true
  with_gil: false
  deprecated: false
- name: flatten
  operator_name: flatten
  overload_name: using_ints
  use_c10_dispatcher: full
  category_override: ''
  matches_jit_signature: true
  schema_string: aten::flatten.using_ints(Tensor self, int start_dim=0, int end_dim=-1) -> Tensor
  method_prefix_derived: ''
  arguments:
  - annotation: null
    dynamic_type: Tensor
    is_nullable: false
    name: self
    type: const Tensor &
  - annotation: null
    default: 0
    dynamic_type: int64_t
    is_nullable: false
    name: start_dim
    type: int64_t
  - annotation: null
    default: -1
    dynamic_type: int64_t
    is_nullable: false
    name: end_dim
    type: int64_t
  method_of:
  - Type
  - Tensor
  - namespace
  mode: native
  python_module: ''
  returns:
  - dynamic_type: Tensor
    name: result
    type: Tensor
  inplace: false
  is_factory_method: null
  abstract: false
  requires_tensor: false
  device_guard: true
  with_gil: false
  deprecated: false
- name: flatten
  operator_name: flatten
  overload_name: named_out_dim
  use_c10_dispatcher: unboxed_only
  category_override: ''
  matches_jit_signature: true
  schema_string: aten::flatten.named_out_dim(Tensor self, int start_dim, int end_dim, Dimname out_dim) -> Tensor
  method_prefix_derived: ''
  arguments:
  - annotation: null
    dynamic_type: Tensor
    is_nullable: false
    name: self
    type: const Tensor &
  - annotation: null
    dynamic_type: int64_t
    is_nullable: false
    name: start_dim
    type: int64_t
  - annotation: null
    dynamic_type: int64_t
    is_nullable: false
    name: end_dim
    type: int64_t
  - annotation: null
    dynamic_type: Dimname
    is_nullable: false
    name: out_dim
    type: Dimname
  method_of:
  - Type
  - Tensor
  - namespace
  mode: native
  python_module: ''
  returns:
  - dynamic_type: Tensor
    name: result
    type: Tensor
  inplace: false
  is_factory_method: null
  abstract: false
  requires_tensor: false
  device_guard: true
  with_gil: false
  deprecated: false
- name: flatten
  operator_name: flatten
  overload_name: using_names
  use_c10_dispatcher: unboxed_only
  category_override: ''
  matches_jit_signature: true
  schema_string: aten::flatten.using_names(Tensor self, Dimname start_dim, Dimname end_dim, Dimname out_dim) -> Tensor
  method_prefix_derived: ''
  arguments:
  - annotation: null
    dynamic_type: Tensor
    is_nullable: false
    name: self
    type: const Tensor &
  - annotation: null
    dynamic_type: Dimname
    is_nullable: false
    name: start_dim
    type: Dimname
  - annotation: null
    dynamic_type: Dimname
    is_nullable: false
    name: end_dim
    type: Dimname
  - annotation: null
    dynamic_type: Dimname
    is_nullable: false
    name: out_dim
    type: Dimname
  method_of:
  - Type
  - Tensor
  - namespace
  mode: native
  python_module: ''
  returns:
  - dynamic_type: Tensor
    name: result
    type: Tensor
  inplace: false
  is_factory_method: null
  abstract: false
  requires_tensor: false
  device_guard: true
  with_gil: false
  deprecated: false
- name: flatten
  operator_name: flatten
  overload_name: DimnameList
  use_c10_dispatcher: unboxed_only
  category_override: ''
  matches_jit_signature: true
  schema_string: aten::flatten.DimnameList(Tensor self, Dimname[] dims, Dimname out_dim) -> Tensor
  method_prefix_derived: ''
  arguments:
  - annotation: null
    dynamic_type: Tensor
    is_nullable: false
    name: self
    type: const Tensor &
  - annotation: null
    dynamic_type: DimnameList
    is_nullable: false
    name: dims
    type: DimnameList
  - annotation: null
    dynamic_type: Dimname
    is_nullable: false
    name: out_dim
    type: Dimname
  method_of:
  - Type
  - Tensor
  - namespace
  mode: native
  python_module: ''
  returns:
  - dynamic_type: Tensor
    name: result
    type: Tensor
  inplace: false
  is_factory_method: null
  abstract: false
  requires_tensor: false
  device_guard: true
  with_gil: false
  deprecated: false
- name: fill_
  operator_name: fill_
  overload_name: Scalar
  use_c10_dispatcher: unboxed_only
  category_override: ''
  matches_jit_signature: true
  schema_string: aten::fill_.Scalar(Tensor(a!) self, Scalar value) -> Tensor(a!)
  method_prefix_derived: ''
  arguments:
  - annotation: a!
    dynamic_type: Tensor
    is_nullable: false
    name: self
    type: Tensor &
  - annotation: null
    dynamic_type: Scalar
    is_nullable: false
    name: value
    type: Scalar
  method_of:
  - Type
  - Tensor
  - namespace
  mode: native
  python_module: ''
  returns:
  - dynamic_type: Tensor
    name: self
    type: Tensor &
  inplace: true
  is_factory_method: null
  abstract: false
  requires_tensor: false
  device_guard: true
  with_gil: false
  deprecated: false
- name: fill_
  operator_name: fill_
  overload_name: Tensor
  use_c10_dispatcher: unboxed_only
  category_override: ''
  matches_jit_signature: true
  schema_string: aten::fill_.Tensor(Tensor(a!) self, Tensor value) -> Tensor(a!)
  method_prefix_derived: ''
  arguments:
  - annotation: a!
    dynamic_type: Tensor
    is_nullable: false
    name: self
    type: Tensor &
  - annotation: null
    dynamic_type: Tensor
    is_nullable: false
    name: value
    type: const Tensor &
  method_of:
  - Type
  - Tensor
  - namespace
  mode: native
  python_module: ''
  returns:
  - dynamic_type: Tensor
    name: self
    type: Tensor &
  inplace: true
  is_factory_method: null
  abstract: false
  requires_tensor: false
  device_guard: true
  with_gil: false
  deprecated: false
- name: floor
  operator_name: floor
  overload_name: ''
  use_c10_dispatcher: full
  category_override: ''
  matches_jit_signature: true
  schema_string: aten::floor(Tensor self) -> Tensor
  method_prefix_derived: ''
  arguments:
  - annotation: null
    dynamic_type: Tensor
    is_nullable: false
    name: self
    type: const Tensor &
  method_of:
  - Type
  - Tensor
  - namespace
  mode: native
  python_module: ''
  returns:
  - dynamic_type: Tensor
    name: result
    type: Tensor
  inplace: false
  is_factory_method: null
  abstract: false
  requires_tensor: false
  device_guard: true
  with_gil: false
  deprecated: false
- name: floor_
  operator_name: floor_
  overload_name: ''
  use_c10_dispatcher: unboxed_only
  category_override: ''
  matches_jit_signature: true
  schema_string: aten::floor_(Tensor(a!) self) -> Tensor(a!)
  method_prefix_derived: ''
  arguments:
  - annotation: a!
    dynamic_type: Tensor
    is_nullable: false
    name: self
    type: Tensor &
  method_of:
  - Type
  - Tensor
  - namespace
  mode: native
  python_module: ''
  returns:
  - dynamic_type: Tensor
    name: self
    type: Tensor &
  inplace: true
  is_factory_method: null
  abstract: false
  requires_tensor: false
  device_guard: true
  with_gil: false
  deprecated: false
- name: floor_out
  operator_name: floor
  overload_name: out
  use_c10_dispatcher: unboxed_only
  category_override: ''
  matches_jit_signature: true
  schema_string: aten::floor.out(Tensor self, *, Tensor(a!) out) -> Tensor(a!)
  method_prefix_derived: ''
  arguments:
  - allocate: true
    annotation: a!
    dynamic_type: Tensor
    is_nullable: false
    kwarg_only: false
    name: out
    output: true
    type: Tensor &
  - annotation: null
    dynamic_type: Tensor
    is_nullable: false
    name: self
    type: const Tensor &
  method_of:
  - Type
  - namespace
  mode: native
  python_module: ''
  returns:
  - dynamic_type: Tensor
    name: out
    type: Tensor &
  inplace: false
  is_factory_method: null
  abstract: true
  requires_tensor: false
  device_guard: true
  with_gil: false
  deprecated: false
- name: frac
  operator_name: frac
  overload_name: ''
  use_c10_dispatcher: full
  category_override: ''
  matches_jit_signature: true
  schema_string: aten::frac(Tensor self) -> Tensor
  method_prefix_derived: ''
  arguments:
  - annotation: null
    dynamic_type: Tensor
    is_nullable: false
    name: self
    type: const Tensor &
  method_of:
  - Type
  - Tensor
  - namespace
  mode: native
  python_module: ''
  returns:
  - dynamic_type: Tensor
    name: result
    type: Tensor
  inplace: false
  is_factory_method: null
  abstract: false
  requires_tensor: false
  device_guard: true
  with_gil: false
  deprecated: false
- name: frac_
  operator_name: frac_
  overload_name: ''
  use_c10_dispatcher: unboxed_only
  category_override: ''
  matches_jit_signature: true
  schema_string: aten::frac_(Tensor(a!) self) -> Tensor(a!)
  method_prefix_derived: ''
  arguments:
  - annotation: a!
    dynamic_type: Tensor
    is_nullable: false
    name: self
    type: Tensor &
  method_of:
  - Type
  - Tensor
  - namespace
  mode: native
  python_module: ''
  returns:
  - dynamic_type: Tensor
    name: self
    type: Tensor &
  inplace: true
  is_factory_method: null
  abstract: false
  requires_tensor: false
  device_guard: true
  with_gil: false
  deprecated: false
- name: frac_out
  operator_name: frac
  overload_name: out
  use_c10_dispatcher: unboxed_only
  category_override: ''
  matches_jit_signature: true
  schema_string: aten::frac.out(Tensor self, *, Tensor(a!) out) -> Tensor(a!)
  method_prefix_derived: ''
  arguments:
  - allocate: true
    annotation: a!
    dynamic_type: Tensor
    is_nullable: false
    kwarg_only: false
    name: out
    output: true
    type: Tensor &
  - annotation: null
    dynamic_type: Tensor
    is_nullable: false
    name: self
    type: const Tensor &
  method_of:
  - Type
  - namespace
  mode: native
  python_module: ''
  returns:
  - dynamic_type: Tensor
    name: out
    type: Tensor &
  inplace: false
  is_factory_method: null
  abstract: false
  requires_tensor: false
  device_guard: true
  with_gil: false
  deprecated: false
- name: full
  operator_name: full
  overload_name: names
  use_c10_dispatcher: unboxed_only
  category_override: ''
  matches_jit_signature: true
  schema_string: aten::full.names(int[] size, Scalar fill_value, *, Dimname[]? names, ScalarType? dtype=None, Layout? layout=None, Device? device=None, bool? pin_memory=None) -> Tensor
  method_prefix_derived: ''
  arguments:
  - annotation: null
    dynamic_type: IntArrayRef
    is_nullable: false
    name: size
    type: IntArrayRef
  - annotation: null
    dynamic_type: Scalar
    is_nullable: false
    name: fill_value
    type: Scalar
  - annotation: null
    dynamic_type: DimnameList
    is_nullable: true
    kwarg_only: true
    name: names
    type: c10::optional<DimnameList>
  - annotation: null
    default: '{}'
    dynamic_type: TensorOptions
    is_nullable: false
    kwarg_only: true
    name: options
    type: const TensorOptions &
  method_of:
  - Type
  - namespace
  mode: native
  python_module: ''
  returns:
  - dynamic_type: Tensor
    name: result
    type: Tensor
  inplace: false
  is_factory_method: true
  abstract: false
  requires_tensor: false
  device_guard: false
  with_gil: false
  deprecated: false
- name: full
  operator_name: full
  overload_name: ''
  use_c10_dispatcher: unboxed_only
  category_override: ''
  matches_jit_signature: true
  schema_string: aten::full(int[] size, Scalar fill_value, *, ScalarType? dtype=None, Layout? layout=None, Device? device=None, bool? pin_memory=None) -> Tensor
  method_prefix_derived: ''
  arguments:
  - annotation: null
    dynamic_type: IntArrayRef
    is_nullable: false
    name: size
    type: IntArrayRef
  - annotation: null
    dynamic_type: Scalar
    is_nullable: false
    name: fill_value
    type: Scalar
  - annotation: null
    default: '{}'
    dynamic_type: TensorOptions
    is_nullable: false
    kwarg_only: true
    name: options
    type: const TensorOptions &
  method_of:
  - Type
  - namespace
  mode: native
  python_module: ''
  returns:
  - dynamic_type: Tensor
    name: result
    type: Tensor
  inplace: false
  is_factory_method: true
  abstract: false
  requires_tensor: false
  device_guard: true
  with_gil: false
  deprecated: false
- name: full_out
  operator_name: full
  overload_name: out
  use_c10_dispatcher: unboxed_only
  category_override: ''
  matches_jit_signature: true
  schema_string: aten::full.out(int[] size, Scalar fill_value, *, Tensor(a!) out) -> Tensor(a!)
  method_prefix_derived: ''
  arguments:
  - allocate: true
    annotation: a!
    dynamic_type: Tensor
    is_nullable: false
    kwarg_only: false
    name: out
    output: true
    type: Tensor &
  - annotation: null
    dynamic_type: IntArrayRef
    is_nullable: false
    name: size
    type: IntArrayRef
  - annotation: null
    dynamic_type: Scalar
    is_nullable: false
    name: fill_value
    type: Scalar
  method_of:
  - Type
  - namespace
  mode: native
  python_module: ''
  returns:
  - dynamic_type: Tensor
    name: out
    type: Tensor &
  inplace: false
  is_factory_method: null
  abstract: false
  requires_tensor: false
  device_guard: true
  with_gil: false
  deprecated: false
- name: full_like
  operator_name: full_like
  overload_name: ''
  use_c10_dispatcher: unboxed_only
  category_override: ''
  matches_jit_signature: true
  schema_string: aten::full_like(Tensor self, Scalar fill_value, *, MemoryFormat? memory_format=None) -> Tensor
  method_prefix_derived: ''
  arguments:
  - annotation: null
    dynamic_type: Tensor
    is_nullable: false
    name: self
    type: const Tensor &
  - annotation: null
    dynamic_type: Scalar
    is_nullable: false
    name: fill_value
    type: Scalar
  - annotation: null
    default: c10::nullopt
    dynamic_type: MemoryFormat
    is_nullable: true
    kwarg_only: true
    name: memory_format
    type: c10::optional<MemoryFormat>
  method_of:
  - Type
  - namespace
  mode: native
  python_module: ''
  returns:
  - dynamic_type: Tensor
    name: result
    type: Tensor
  inplace: false
  is_factory_method: null
  abstract: false
  requires_tensor: false
  device_guard: true
  with_gil: false
  deprecated: false
- name: full_like
  operator_name: full_like
  overload_name: dtype
  use_c10_dispatcher: unboxed_only
  category_override: ''
  matches_jit_signature: true
  schema_string: aten::full_like.dtype(Tensor self, Scalar fill_value, *, ScalarType dtype, Layout layout, Device device, bool pin_memory=False, MemoryFormat? memory_format=None) -> Tensor
  method_prefix_derived: ''
  arguments:
  - annotation: null
    dynamic_type: Tensor
    is_nullable: false
    name: self
    type: const Tensor &
  - annotation: null
    dynamic_type: Scalar
    is_nullable: false
    name: fill_value
    type: Scalar
  - annotation: null
    dynamic_type: TensorOptions
    is_nullable: false
    kwarg_only: true
    name: options
    type: const TensorOptions &
  - annotation: null
    default: c10::nullopt
    dynamic_type: MemoryFormat
    is_nullable: true
    kwarg_only: true
    name: memory_format
    type: c10::optional<MemoryFormat>
  method_of:
  - Type
  - namespace
  mode: native
  python_module: ''
  returns:
  - dynamic_type: Tensor
    name: result
    type: Tensor
  inplace: false
  is_factory_method: true
  abstract: false
  requires_tensor: false
  device_guard: true
  with_gil: false
  deprecated: false
- name: from_file
  operator_name: from_file
  overload_name: ''
  use_c10_dispatcher: unboxed_only
  category_override: ''
  matches_jit_signature: true
  schema_string: aten::from_file(str filename, bool? shared=None, int? size=0, *, ScalarType? dtype=None, Layout? layout=None, Device? device=None, bool? pin_memory=None) -> Tensor
  method_prefix_derived: ''
  arguments:
  - annotation: null
    dynamic_type: std::string
    is_nullable: false
    name: filename
    type: std::string
  - annotation: null
    default: c10::nullopt
    dynamic_type: bool
    is_nullable: true
    name: shared
    type: c10::optional<bool>
  - annotation: null
    default: 0
    dynamic_type: int64_t
    is_nullable: true
    name: size
    type: c10::optional<int64_t>
  - annotation: null
    default: '{}'
    dynamic_type: TensorOptions
    is_nullable: false
    kwarg_only: true
    name: options
    type: const TensorOptions &
  method_of:
  - Type
  - namespace
  mode: native
  python_module: ''
  returns:
  - dynamic_type: Tensor
    name: result
    type: Tensor
  inplace: false
  is_factory_method: true
  abstract: true
  requires_tensor: false
  device_guard: true
  with_gil: false
  deprecated: false
- name: grid_sampler
  operator_name: grid_sampler
  overload_name: ''
  use_c10_dispatcher: full
  category_override: ''
  matches_jit_signature: true
  schema_string: aten::grid_sampler(Tensor input, Tensor grid, int interpolation_mode, int padding_mode, bool align_corners) -> Tensor
  method_prefix_derived: ''
  arguments:
  - annotation: null
    dynamic_type: Tensor
    is_nullable: false
    name: input
    type: const Tensor &
  - annotation: null
    dynamic_type: Tensor
    is_nullable: false
    name: grid
    type: const Tensor &
  - annotation: null
    dynamic_type: int64_t
    is_nullable: false
    name: interpolation_mode
    type: int64_t
  - annotation: null
    dynamic_type: int64_t
    is_nullable: false
    name: padding_mode
    type: int64_t
  - annotation: null
    dynamic_type: bool
    is_nullable: false
    name: align_corners
    type: bool
  method_of:
  - Type
  - namespace
  mode: native
  python_module: ''
  returns:
  - dynamic_type: Tensor
    name: result
    type: Tensor
  inplace: false
  is_factory_method: null
  abstract: false
  requires_tensor: false
  device_guard: true
  with_gil: false
  deprecated: false
- name: grid_sampler_2d
  operator_name: grid_sampler_2d
  overload_name: ''
  use_c10_dispatcher: full
  category_override: ''
  matches_jit_signature: true
  schema_string: aten::grid_sampler_2d(Tensor input, Tensor grid, int interpolation_mode, int padding_mode, bool align_corners) -> Tensor
  method_prefix_derived: ''
  arguments:
  - annotation: null
    dynamic_type: Tensor
    is_nullable: false
    name: input
    type: const Tensor &
  - annotation: null
    dynamic_type: Tensor
    is_nullable: false
    name: grid
    type: const Tensor &
  - annotation: null
    dynamic_type: int64_t
    is_nullable: false
    name: interpolation_mode
    type: int64_t
  - annotation: null
    dynamic_type: int64_t
    is_nullable: false
    name: padding_mode
    type: int64_t
  - annotation: null
    dynamic_type: bool
    is_nullable: false
    name: align_corners
    type: bool
  method_of:
  - Type
  - namespace
  mode: native
  python_module: ''
  returns:
  - dynamic_type: Tensor
    name: result
    type: Tensor
  inplace: false
  is_factory_method: null
  abstract: true
  requires_tensor: false
  device_guard: true
  with_gil: false
  deprecated: false
- name: grid_sampler_2d_backward
  operator_name: grid_sampler_2d_backward
  overload_name: ''
  use_c10_dispatcher: unboxed_only
  category_override: ''
  matches_jit_signature: true
  schema_string: aten::grid_sampler_2d_backward(Tensor grad_output, Tensor input, Tensor grid, int interpolation_mode, int padding_mode, bool align_corners) -> (Tensor, Tensor)
  method_prefix_derived: ''
  arguments:
  - annotation: null
    dynamic_type: Tensor
    is_nullable: false
    name: grad_output
    type: const Tensor &
  - annotation: null
    dynamic_type: Tensor
    is_nullable: false
    name: input
    type: const Tensor &
  - annotation: null
    dynamic_type: Tensor
    is_nullable: false
    name: grid
    type: const Tensor &
  - annotation: null
    dynamic_type: int64_t
    is_nullable: false
    name: interpolation_mode
    type: int64_t
  - annotation: null
    dynamic_type: int64_t
    is_nullable: false
    name: padding_mode
    type: int64_t
  - annotation: null
    dynamic_type: bool
    is_nullable: false
    name: align_corners
    type: bool
  method_of:
  - Type
  - namespace
  mode: native
  python_module: ''
  returns:
  - dynamic_type: Tensor
    name: result0
    type: Tensor
  - dynamic_type: Tensor
    name: result1
    type: Tensor
  inplace: false
  is_factory_method: null
  abstract: true
  requires_tensor: false
  device_guard: true
  with_gil: false
  deprecated: false
- name: grid_sampler_3d
  operator_name: grid_sampler_3d
  overload_name: ''
  use_c10_dispatcher: full
  category_override: ''
  matches_jit_signature: true
  schema_string: aten::grid_sampler_3d(Tensor input, Tensor grid, int interpolation_mode, int padding_mode, bool align_corners) -> Tensor
  method_prefix_derived: ''
  arguments:
  - annotation: null
    dynamic_type: Tensor
    is_nullable: false
    name: input
    type: const Tensor &
  - annotation: null
    dynamic_type: Tensor
    is_nullable: false
    name: grid
    type: const Tensor &
  - annotation: null
    dynamic_type: int64_t
    is_nullable: false
    name: interpolation_mode
    type: int64_t
  - annotation: null
    dynamic_type: int64_t
    is_nullable: false
    name: padding_mode
    type: int64_t
  - annotation: null
    dynamic_type: bool
    is_nullable: false
    name: align_corners
    type: bool
  method_of:
  - Type
  - namespace
  mode: native
  python_module: ''
  returns:
  - dynamic_type: Tensor
    name: result
    type: Tensor
  inplace: false
  is_factory_method: null
  abstract: true
  requires_tensor: false
  device_guard: true
  with_gil: false
  deprecated: false
- name: grid_sampler_3d_backward
  operator_name: grid_sampler_3d_backward
  overload_name: ''
  use_c10_dispatcher: unboxed_only
  category_override: ''
  matches_jit_signature: true
  schema_string: aten::grid_sampler_3d_backward(Tensor grad_output, Tensor input, Tensor grid, int interpolation_mode, int padding_mode, bool align_corners) -> (Tensor, Tensor)
  method_prefix_derived: ''
  arguments:
  - annotation: null
    dynamic_type: Tensor
    is_nullable: false
    name: grad_output
    type: const Tensor &
  - annotation: null
    dynamic_type: Tensor
    is_nullable: false
    name: input
    type: const Tensor &
  - annotation: null
    dynamic_type: Tensor
    is_nullable: false
    name: grid
    type: const Tensor &
  - annotation: null
    dynamic_type: int64_t
    is_nullable: false
    name: interpolation_mode
    type: int64_t
  - annotation: null
    dynamic_type: int64_t
    is_nullable: false
    name: padding_mode
    type: int64_t
  - annotation: null
    dynamic_type: bool
    is_nullable: false
    name: align_corners
    type: bool
  method_of:
  - Type
  - namespace
  mode: native
  python_module: ''
  returns:
  - dynamic_type: Tensor
    name: result0
    type: Tensor
  - dynamic_type: Tensor
    name: result1
    type: Tensor
  inplace: false
  is_factory_method: null
  abstract: true
  requires_tensor: false
  device_guard: true
  with_gil: false
  deprecated: false
- name: hann_window
  operator_name: hann_window
  overload_name: ''
  use_c10_dispatcher: unboxed_only
  category_override: ''
  matches_jit_signature: true
  schema_string: aten::hann_window(int window_length, *, ScalarType? dtype=None, Layout? layout=None, Device? device=None, bool? pin_memory=None) -> Tensor
  method_prefix_derived: ''
  arguments:
  - annotation: null
    dynamic_type: int64_t
    is_nullable: false
    name: window_length
    type: int64_t
  - annotation: null
    default: '{}'
    dynamic_type: TensorOptions
    is_nullable: false
    kwarg_only: true
    name: options
    type: const TensorOptions &
  method_of:
  - Type
  - namespace
  mode: native
  python_module: ''
  returns:
  - dynamic_type: Tensor
    name: result
    type: Tensor
  inplace: false
  is_factory_method: true
  abstract: false
  requires_tensor: false
  device_guard: true
  with_gil: false
  deprecated: false
- name: hann_window
  operator_name: hann_window
  overload_name: periodic
  use_c10_dispatcher: unboxed_only
  category_override: ''
  matches_jit_signature: true
  schema_string: aten::hann_window.periodic(int window_length, bool periodic, *, ScalarType? dtype=None, Layout? layout=None, Device? device=None, bool? pin_memory=None) -> Tensor
  method_prefix_derived: ''
  arguments:
  - annotation: null
    dynamic_type: int64_t
    is_nullable: false
    name: window_length
    type: int64_t
  - annotation: null
    dynamic_type: bool
    is_nullable: false
    name: periodic
    type: bool
  - annotation: null
    default: '{}'
    dynamic_type: TensorOptions
    is_nullable: false
    kwarg_only: true
    name: options
    type: const TensorOptions &
  method_of:
  - Type
  - namespace
  mode: native
  python_module: ''
  returns:
  - dynamic_type: Tensor
    name: result
    type: Tensor
  inplace: false
  is_factory_method: true
  abstract: false
  requires_tensor: false
  device_guard: true
  with_gil: false
  deprecated: false
- name: hamming_window
  operator_name: hamming_window
  overload_name: ''
  use_c10_dispatcher: unboxed_only
  category_override: ''
  matches_jit_signature: true
  schema_string: aten::hamming_window(int window_length, *, ScalarType? dtype=None, Layout? layout=None, Device? device=None, bool? pin_memory=None) -> Tensor
  method_prefix_derived: ''
  arguments:
  - annotation: null
    dynamic_type: int64_t
    is_nullable: false
    name: window_length
    type: int64_t
  - annotation: null
    default: '{}'
    dynamic_type: TensorOptions
    is_nullable: false
    kwarg_only: true
    name: options
    type: const TensorOptions &
  method_of:
  - Type
  - namespace
  mode: native
  python_module: ''
  returns:
  - dynamic_type: Tensor
    name: result
    type: Tensor
  inplace: false
  is_factory_method: true
  abstract: false
  requires_tensor: false
  device_guard: true
  with_gil: false
  deprecated: false
- name: hamming_window
  operator_name: hamming_window
  overload_name: periodic
  use_c10_dispatcher: unboxed_only
  category_override: ''
  matches_jit_signature: true
  schema_string: aten::hamming_window.periodic(int window_length, bool periodic, *, ScalarType? dtype=None, Layout? layout=None, Device? device=None, bool? pin_memory=None) -> Tensor
  method_prefix_derived: ''
  arguments:
  - annotation: null
    dynamic_type: int64_t
    is_nullable: false
    name: window_length
    type: int64_t
  - annotation: null
    dynamic_type: bool
    is_nullable: false
    name: periodic
    type: bool
  - annotation: null
    default: '{}'
    dynamic_type: TensorOptions
    is_nullable: false
    kwarg_only: true
    name: options
    type: const TensorOptions &
  method_of:
  - Type
  - namespace
  mode: native
  python_module: ''
  returns:
  - dynamic_type: Tensor
    name: result
    type: Tensor
  inplace: false
  is_factory_method: true
  abstract: false
  requires_tensor: false
  device_guard: true
  with_gil: false
  deprecated: false
- name: hamming_window
  operator_name: hamming_window
  overload_name: periodic_alpha
  use_c10_dispatcher: unboxed_only
  category_override: ''
  matches_jit_signature: true
  schema_string: aten::hamming_window.periodic_alpha(int window_length, bool periodic, float alpha, *, ScalarType? dtype=None, Layout? layout=None, Device? device=None, bool? pin_memory=None) -> Tensor
  method_prefix_derived: ''
  arguments:
  - annotation: null
    dynamic_type: int64_t
    is_nullable: false
    name: window_length
    type: int64_t
  - annotation: null
    dynamic_type: bool
    is_nullable: false
    name: periodic
    type: bool
  - annotation: null
    dynamic_type: double
    is_nullable: false
    name: alpha
    type: double
  - annotation: null
    default: '{}'
    dynamic_type: TensorOptions
    is_nullable: false
    kwarg_only: true
    name: options
    type: const TensorOptions &
  method_of:
  - Type
  - namespace
  mode: native
  python_module: ''
  returns:
  - dynamic_type: Tensor
    name: result
    type: Tensor
  inplace: false
  is_factory_method: true
  abstract: false
  requires_tensor: false
  device_guard: true
  with_gil: false
  deprecated: false
- name: hamming_window
  operator_name: hamming_window
  overload_name: periodic_alpha_beta
  use_c10_dispatcher: unboxed_only
  category_override: ''
  matches_jit_signature: true
  schema_string: aten::hamming_window.periodic_alpha_beta(int window_length, bool periodic, float alpha, float beta, *, ScalarType? dtype=None, Layout? layout=None, Device? device=None, bool? pin_memory=None) -> Tensor
  method_prefix_derived: ''
  arguments:
  - annotation: null
    dynamic_type: int64_t
    is_nullable: false
    name: window_length
    type: int64_t
  - annotation: null
    dynamic_type: bool
    is_nullable: false
    name: periodic
    type: bool
  - annotation: null
    dynamic_type: double
    is_nullable: false
    name: alpha
    type: double
  - annotation: null
    dynamic_type: double
    is_nullable: false
    name: beta
    type: double
  - annotation: null
    default: '{}'
    dynamic_type: TensorOptions
    is_nullable: false
    kwarg_only: true
    name: options
    type: const TensorOptions &
  method_of:
  - Type
  - namespace
  mode: native
  python_module: ''
  returns:
  - dynamic_type: Tensor
    name: result
    type: Tensor
  inplace: false
  is_factory_method: true
  abstract: false
  requires_tensor: false
  device_guard: true
  with_gil: false
  deprecated: false
- name: hinge_embedding_loss
  operator_name: hinge_embedding_loss
  overload_name: ''
  use_c10_dispatcher: full
  category_override: ''
  matches_jit_signature: true
  schema_string: aten::hinge_embedding_loss(Tensor self, Tensor target, float margin=1.0, int reduction=Mean) -> Tensor
  method_prefix_derived: ''
  arguments:
  - annotation: null
    dynamic_type: Tensor
    is_nullable: false
    name: self
    type: const Tensor &
  - annotation: null
    dynamic_type: Tensor
    is_nullable: false
    name: target
    type: const Tensor &
  - annotation: null
    default: 1.0
    dynamic_type: double
    is_nullable: false
    name: margin
    type: double
  - annotation: null
    default: at::Reduction::Mean
    dynamic_type: int64_t
    is_nullable: false
    name: reduction
    type: int64_t
  method_of:
  - Type
  - namespace
  mode: native
  python_module: ''
  returns:
  - dynamic_type: Tensor
    name: result
    type: Tensor
  inplace: false
  is_factory_method: null
  abstract: false
  requires_tensor: false
  device_guard: true
  with_gil: false
  deprecated: false
- name: ger
  operator_name: ger
  overload_name: ''
  use_c10_dispatcher: full
  category_override: ''
  matches_jit_signature: true
  schema_string: aten::ger(Tensor self, Tensor vec2) -> Tensor
  method_prefix_derived: ''
  arguments:
  - annotation: null
    dynamic_type: Tensor
    is_nullable: false
    name: self
    type: const Tensor &
  - annotation: null
    dynamic_type: Tensor
    is_nullable: false
    name: vec2
    type: const Tensor &
  method_of:
  - Type
  - Tensor
  - namespace
  mode: native
  python_module: ''
  returns:
  - dynamic_type: Tensor
    name: result
    type: Tensor
  inplace: false
  is_factory_method: null
  abstract: true
  requires_tensor: false
  device_guard: true
  with_gil: false
  deprecated: false
- name: ger_out
  operator_name: ger
  overload_name: out
  use_c10_dispatcher: unboxed_only
  category_override: ''
  matches_jit_signature: true
  schema_string: aten::ger.out(Tensor self, Tensor vec2, *, Tensor(a!) out) -> Tensor(a!)
  method_prefix_derived: ''
  arguments:
  - allocate: true
    annotation: a!
    dynamic_type: Tensor
    is_nullable: false
    kwarg_only: false
    name: out
    output: true
    type: Tensor &
  - annotation: null
    dynamic_type: Tensor
    is_nullable: false
    name: self
    type: const Tensor &
  - annotation: null
    dynamic_type: Tensor
    is_nullable: false
    name: vec2
    type: const Tensor &
  method_of:
  - Type
  - namespace
  mode: native
  python_module: ''
  returns:
  - dynamic_type: Tensor
    name: out
    type: Tensor &
  inplace: false
  is_factory_method: null
  abstract: true
  requires_tensor: false
  device_guard: true
  with_gil: false
  deprecated: false
- name: group_norm
  operator_name: group_norm
  overload_name: ''
  use_c10_dispatcher: unboxed_only
  category_override: ''
  matches_jit_signature: true
  schema_string: aten::group_norm(Tensor input, int num_groups, Tensor? weight=None, Tensor? bias=None, float eps=1e-05, bool cudnn_enabled=True) -> Tensor
  method_prefix_derived: ''
  arguments:
  - annotation: null
    dynamic_type: Tensor
    is_nullable: false
    name: input
    type: const Tensor &
  - annotation: null
    dynamic_type: int64_t
    is_nullable: false
    name: num_groups
    type: int64_t
  - annotation: null
    default: '{}'
    dynamic_type: Tensor
    is_nullable: true
    name: weight
    type: const Tensor &
  - annotation: null
    default: '{}'
    dynamic_type: Tensor
    is_nullable: true
    name: bias
    type: const Tensor &
  - annotation: null
    default: 1.0e-05
    dynamic_type: double
    is_nullable: false
    name: eps
    type: double
  - annotation: null
    default: true
    dynamic_type: bool
    is_nullable: false
    name: cudnn_enabled
    type: bool
  method_of:
  - Type
  - namespace
  mode: native
  python_module: ''
  returns:
  - dynamic_type: Tensor
    name: result
    type: Tensor
  inplace: false
  is_factory_method: null
  abstract: false
  requires_tensor: false
  device_guard: true
  with_gil: false
  deprecated: false
- name: fft
  operator_name: fft
  overload_name: ''
  use_c10_dispatcher: full
  category_override: ''
  matches_jit_signature: true
  schema_string: aten::fft(Tensor self, int signal_ndim, bool normalized=False) -> Tensor
  method_prefix_derived: ''
  arguments:
  - annotation: null
    dynamic_type: Tensor
    is_nullable: false
    name: self
    type: const Tensor &
  - annotation: null
    dynamic_type: int64_t
    is_nullable: false
    name: signal_ndim
    type: int64_t
  - annotation: null
    default: false
    dynamic_type: bool
    is_nullable: false
    name: normalized
    type: bool
  method_of:
  - Type
  - Tensor
  - namespace
  mode: native
  python_module: ''
  returns:
  - dynamic_type: Tensor
    name: result
    type: Tensor
  inplace: false
  is_factory_method: null
  abstract: false
  requires_tensor: false
  device_guard: true
  with_gil: false
  deprecated: false
- name: ifft
  operator_name: ifft
  overload_name: ''
  use_c10_dispatcher: full
  category_override: ''
  matches_jit_signature: true
  schema_string: aten::ifft(Tensor self, int signal_ndim, bool normalized=False) -> Tensor
  method_prefix_derived: ''
  arguments:
  - annotation: null
    dynamic_type: Tensor
    is_nullable: false
    name: self
    type: const Tensor &
  - annotation: null
    dynamic_type: int64_t
    is_nullable: false
    name: signal_ndim
    type: int64_t
  - annotation: null
    default: false
    dynamic_type: bool
    is_nullable: false
    name: normalized
    type: bool
  method_of:
  - Type
  - Tensor
  - namespace
  mode: native
  python_module: ''
  returns:
  - dynamic_type: Tensor
    name: result
    type: Tensor
  inplace: false
  is_factory_method: null
  abstract: false
  requires_tensor: false
  device_guard: true
  with_gil: false
  deprecated: false
- name: rfft
  operator_name: rfft
  overload_name: ''
  use_c10_dispatcher: full
  category_override: ''
  matches_jit_signature: true
  schema_string: aten::rfft(Tensor self, int signal_ndim, bool normalized=False, bool onesided=True) -> Tensor
  method_prefix_derived: ''
  arguments:
  - annotation: null
    dynamic_type: Tensor
    is_nullable: false
    name: self
    type: const Tensor &
  - annotation: null
    dynamic_type: int64_t
    is_nullable: false
    name: signal_ndim
    type: int64_t
  - annotation: null
    default: false
    dynamic_type: bool
    is_nullable: false
    name: normalized
    type: bool
  - annotation: null
    default: true
    dynamic_type: bool
    is_nullable: false
    name: onesided
    type: bool
  method_of:
  - Type
  - Tensor
  - namespace
  mode: native
  python_module: ''
  returns:
  - dynamic_type: Tensor
    name: result
    type: Tensor
  inplace: false
  is_factory_method: null
  abstract: false
  requires_tensor: false
  device_guard: true
  with_gil: false
  deprecated: false
- name: irfft
  operator_name: irfft
  overload_name: ''
  use_c10_dispatcher: unboxed_only
  category_override: ''
  matches_jit_signature: true
  schema_string: aten::irfft(Tensor self, int signal_ndim, bool normalized=False, bool onesided=True, int[] signal_sizes=[]) -> Tensor
  method_prefix_derived: ''
  arguments:
  - annotation: null
    dynamic_type: Tensor
    is_nullable: false
    name: self
    type: const Tensor &
  - annotation: null
    dynamic_type: int64_t
    is_nullable: false
    name: signal_ndim
    type: int64_t
  - annotation: null
    default: false
    dynamic_type: bool
    is_nullable: false
    name: normalized
    type: bool
  - annotation: null
    default: true
    dynamic_type: bool
    is_nullable: false
    name: onesided
    type: bool
  - annotation: null
    default: '{}'
    dynamic_type: IntArrayRef
    is_nullable: false
    name: signal_sizes
    type: IntArrayRef
  method_of:
  - Type
  - Tensor
  - namespace
  mode: native
  python_module: ''
  returns:
  - dynamic_type: Tensor
    name: result
    type: Tensor
  inplace: false
  is_factory_method: null
  abstract: false
  requires_tensor: false
  device_guard: true
  with_gil: false
  deprecated: false
- name: _fft_with_size
  operator_name: _fft_with_size
  overload_name: ''
  use_c10_dispatcher: unboxed_only
  category_override: ''
  matches_jit_signature: true
  schema_string: aten::_fft_with_size(Tensor self, int signal_ndim, bool complex_input, bool complex_output, bool inverse, int[] checked_signal_sizes, bool normalized, bool onesided, int[] output_sizes) -> Tensor
  method_prefix_derived: ''
  arguments:
  - annotation: null
    dynamic_type: Tensor
    is_nullable: false
    name: self
    type: const Tensor &
  - annotation: null
    dynamic_type: int64_t
    is_nullable: false
    name: signal_ndim
    type: int64_t
  - annotation: null
    dynamic_type: bool
    is_nullable: false
    name: complex_input
    type: bool
  - annotation: null
    dynamic_type: bool
    is_nullable: false
    name: complex_output
    type: bool
  - annotation: null
    dynamic_type: bool
    is_nullable: false
    name: inverse
    type: bool
  - annotation: null
    dynamic_type: IntArrayRef
    is_nullable: false
    name: checked_signal_sizes
    type: IntArrayRef
  - annotation: null
    dynamic_type: bool
    is_nullable: false
    name: normalized
    type: bool
  - annotation: null
    dynamic_type: bool
    is_nullable: false
    name: onesided
    type: bool
  - annotation: null
    dynamic_type: IntArrayRef
    is_nullable: false
    name: output_sizes
    type: IntArrayRef
  method_of:
  - Type
  - namespace
  mode: native
  python_module: ''
  returns:
  - dynamic_type: Tensor
    name: result
    type: Tensor
  inplace: false
  is_factory_method: null
  abstract: true
  requires_tensor: false
  device_guard: true
  with_gil: false
  deprecated: false
- name: _cufft_get_plan_cache_size
  operator_name: _cufft_get_plan_cache_size
  overload_name: ''
  use_c10_dispatcher: full
  category_override: ''
  matches_jit_signature: true
  schema_string: aten::_cufft_get_plan_cache_size(int device_index) -> int
  method_prefix_derived: ''
  arguments:
  - annotation: null
    dynamic_type: int64_t
    is_nullable: false
    name: device_index
    type: int64_t
  method_of:
  - Type
  - namespace
  mode: native
  python_module: ''
  returns:
  - dynamic_type: int64_t
    name: result
    type: int64_t
  inplace: false
  is_factory_method: null
  abstract: false
  requires_tensor: false
  device_guard: true
  with_gil: false
  deprecated: false
- name: _cufft_get_plan_cache_max_size
  operator_name: _cufft_get_plan_cache_max_size
  overload_name: ''
  use_c10_dispatcher: full
  category_override: ''
  matches_jit_signature: true
  schema_string: aten::_cufft_get_plan_cache_max_size(int device_index) -> int
  method_prefix_derived: ''
  arguments:
  - annotation: null
    dynamic_type: int64_t
    is_nullable: false
    name: device_index
    type: int64_t
  method_of:
  - Type
  - namespace
  mode: native
  python_module: ''
  returns:
  - dynamic_type: int64_t
    name: result
    type: int64_t
  inplace: false
  is_factory_method: null
  abstract: false
  requires_tensor: false
  device_guard: true
  with_gil: false
  deprecated: false
- name: _cufft_set_plan_cache_max_size
  operator_name: _cufft_set_plan_cache_max_size
  overload_name: ''
  use_c10_dispatcher: unboxed_only
  category_override: ''
  matches_jit_signature: true
  schema_string: aten::_cufft_set_plan_cache_max_size(int device_index, int max_size) -> ()
  method_prefix_derived: ''
  arguments:
  - annotation: null
    dynamic_type: int64_t
    is_nullable: false
    name: device_index
    type: int64_t
  - annotation: null
    dynamic_type: int64_t
    is_nullable: false
    name: max_size
    type: int64_t
  method_of:
  - Type
  - namespace
  mode: native
  python_module: ''
  returns: []
  inplace: false
  is_factory_method: null
  abstract: false
  requires_tensor: false
  device_guard: true
  with_gil: false
  deprecated: false
- name: _cufft_clear_plan_cache
  operator_name: _cufft_clear_plan_cache
  overload_name: ''
  use_c10_dispatcher: unboxed_only
  category_override: ''
  matches_jit_signature: true
  schema_string: aten::_cufft_clear_plan_cache(int device_index) -> ()
  method_prefix_derived: ''
  arguments:
  - annotation: null
    dynamic_type: int64_t
    is_nullable: false
    name: device_index
    type: int64_t
  method_of:
  - Type
  - namespace
  mode: native
  python_module: ''
  returns: []
  inplace: false
  is_factory_method: null
  abstract: false
  requires_tensor: false
  device_guard: true
  with_gil: false
  deprecated: false
- name: index
  operator_name: index
  overload_name: Tensor
  use_c10_dispatcher: unboxed_only
  category_override: ''
  matches_jit_signature: true
  schema_string: aten::index.Tensor(Tensor self, Tensor?[] indices) -> Tensor
  method_prefix_derived: ''
  arguments:
  - annotation: null
    dynamic_type: Tensor
    is_nullable: false
    name: self
    type: const Tensor &
  - annotation: null
    dynamic_type: TensorList
    is_nullable: true
    name: indices
    type: TensorList
  method_of:
  - Type
  - Tensor
  - namespace
  mode: native
  python_module: ''
  returns:
  - dynamic_type: Tensor
    name: result
    type: Tensor
  inplace: false
  is_factory_method: null
  abstract: false
  requires_tensor: false
  device_guard: true
  with_gil: false
  deprecated: false
- name: index_copy_
  operator_name: index_copy_
  overload_name: ''
  use_c10_dispatcher: unboxed_only
  category_override: ''
  matches_jit_signature: true
  schema_string: aten::index_copy_(Tensor(a!) self, int dim, Tensor index, Tensor source) -> Tensor(a!)
  method_prefix_derived: ''
  arguments:
  - annotation: a!
    dynamic_type: Tensor
    is_nullable: false
    name: self
    type: Tensor &
  - annotation: null
    dynamic_type: int64_t
    is_nullable: false
    name: dim
    type: int64_t
  - annotation: null
    dynamic_type: Tensor
    is_nullable: false
    name: index
    type: const Tensor &
  - annotation: null
    dynamic_type: Tensor
    is_nullable: false
    name: source
    type: const Tensor &
  method_of:
  - Type
  - Tensor
  mode: native
  python_module: ''
  returns:
  - dynamic_type: Tensor
    name: self
    type: Tensor &
  inplace: true
  is_factory_method: null
  abstract: false
  requires_tensor: false
  device_guard: true
  with_gil: false
  deprecated: false
- name: index_copy
  operator_name: index_copy
  overload_name: ''
  use_c10_dispatcher: full
  category_override: ''
  matches_jit_signature: true
  schema_string: aten::index_copy(Tensor self, int dim, Tensor index, Tensor source) -> Tensor
  method_prefix_derived: ''
  arguments:
  - annotation: null
    dynamic_type: Tensor
    is_nullable: false
    name: self
    type: const Tensor &
  - annotation: null
    dynamic_type: int64_t
    is_nullable: false
    name: dim
    type: int64_t
  - annotation: null
    dynamic_type: Tensor
    is_nullable: false
    name: index
    type: const Tensor &
  - annotation: null
    dynamic_type: Tensor
    is_nullable: false
    name: source
    type: const Tensor &
  method_of:
  - Type
  - Tensor
  - namespace
  mode: native
  python_module: ''
  returns:
  - dynamic_type: Tensor
    name: result
    type: Tensor
  inplace: false
  is_factory_method: null
  abstract: false
  requires_tensor: false
  device_guard: true
  with_gil: false
  deprecated: false
- name: index_copy_
  operator_name: index_copy_
  overload_name: dimname
  use_c10_dispatcher: unboxed_only
  category_override: ''
  matches_jit_signature: true
  schema_string: aten::index_copy_.dimname(Tensor(a!) self, Dimname dim, Tensor index, Tensor source) -> Tensor(a!)
  method_prefix_derived: ''
  arguments:
  - annotation: a!
    dynamic_type: Tensor
    is_nullable: false
    name: self
    type: Tensor &
  - annotation: null
    dynamic_type: Dimname
    is_nullable: false
    name: dim
    type: Dimname
  - annotation: null
    dynamic_type: Tensor
    is_nullable: false
    name: index
    type: const Tensor &
  - annotation: null
    dynamic_type: Tensor
    is_nullable: false
    name: source
    type: const Tensor &
  method_of:
  - Type
  - Tensor
  mode: native
  python_module: ''
  returns:
  - dynamic_type: Tensor
    name: self
    type: Tensor &
  inplace: true
  is_factory_method: null
  abstract: false
  requires_tensor: false
  device_guard: true
  with_gil: false
  deprecated: false
- name: index_copy
  operator_name: index_copy
  overload_name: dimname
  use_c10_dispatcher: unboxed_only
  category_override: ''
  matches_jit_signature: true
  schema_string: aten::index_copy.dimname(Tensor self, Dimname dim, Tensor index, Tensor source) -> Tensor
  method_prefix_derived: ''
  arguments:
  - annotation: null
    dynamic_type: Tensor
    is_nullable: false
    name: self
    type: const Tensor &
  - annotation: null
    dynamic_type: Dimname
    is_nullable: false
    name: dim
    type: Dimname
  - annotation: null
    dynamic_type: Tensor
    is_nullable: false
    name: index
    type: const Tensor &
  - annotation: null
    dynamic_type: Tensor
    is_nullable: false
    name: source
    type: const Tensor &
  method_of:
  - Type
  - Tensor
  - namespace
  mode: native
  python_module: ''
  returns:
  - dynamic_type: Tensor
    name: result
    type: Tensor
  inplace: false
  is_factory_method: null
  abstract: false
  requires_tensor: false
  device_guard: true
  with_gil: false
  deprecated: false
- name: index_put_
  operator_name: index_put_
  overload_name: ''
  use_c10_dispatcher: unboxed_only
  category_override: ''
  matches_jit_signature: true
  schema_string: aten::index_put_(Tensor(a!) self, Tensor?[] indices, Tensor values, bool accumulate=False) -> Tensor(a!)
  method_prefix_derived: ''
  arguments:
  - annotation: a!
    dynamic_type: Tensor
    is_nullable: false
    name: self
    type: Tensor &
  - annotation: null
    dynamic_type: TensorList
    is_nullable: true
    name: indices
    type: TensorList
  - annotation: null
    dynamic_type: Tensor
    is_nullable: false
    name: values
    type: const Tensor &
  - annotation: null
    default: false
    dynamic_type: bool
    is_nullable: false
    name: accumulate
    type: bool
  method_of:
  - Type
  - Tensor
  - namespace
  mode: native
  python_module: ''
  returns:
  - dynamic_type: Tensor
    name: self
    type: Tensor &
  inplace: true
  is_factory_method: null
  abstract: false
  requires_tensor: false
  device_guard: true
  with_gil: false
  deprecated: false
- name: index_put
  operator_name: index_put
  overload_name: ''
  use_c10_dispatcher: unboxed_only
  category_override: ''
  matches_jit_signature: true
  schema_string: aten::index_put(Tensor self, Tensor?[] indices, Tensor values, bool accumulate=False) -> Tensor
  method_prefix_derived: ''
  arguments:
  - annotation: null
    dynamic_type: Tensor
    is_nullable: false
    name: self
    type: const Tensor &
  - annotation: null
    dynamic_type: TensorList
    is_nullable: true
    name: indices
    type: TensorList
  - annotation: null
    dynamic_type: Tensor
    is_nullable: false
    name: values
    type: const Tensor &
  - annotation: null
    default: false
    dynamic_type: bool
    is_nullable: false
    name: accumulate
    type: bool
  method_of:
  - Type
  - Tensor
  - namespace
  mode: native
  python_module: ''
  returns:
  - dynamic_type: Tensor
    name: result
    type: Tensor
  inplace: false
  is_factory_method: null
  abstract: false
  requires_tensor: false
  device_guard: true
  with_gil: false
  deprecated: false
- name: _index_put_impl_
  operator_name: _index_put_impl_
  overload_name: ''
  use_c10_dispatcher: unboxed_only
  category_override: ''
  matches_jit_signature: true
  schema_string: aten::_index_put_impl_(Tensor(a!) self, Tensor?[] indices, Tensor values, bool accumulate=False, bool unsafe=False) -> Tensor(a!)
  method_prefix_derived: ''
  arguments:
  - annotation: a!
    dynamic_type: Tensor
    is_nullable: false
    name: self
    type: Tensor &
  - annotation: null
    dynamic_type: TensorList
    is_nullable: true
    name: indices
    type: TensorList
  - annotation: null
    dynamic_type: Tensor
    is_nullable: false
    name: values
    type: const Tensor &
  - annotation: null
    default: false
    dynamic_type: bool
    is_nullable: false
    name: accumulate
    type: bool
  - annotation: null
    default: false
    dynamic_type: bool
    is_nullable: false
    name: unsafe
    type: bool
  method_of:
  - Type
  - namespace
  mode: native
  python_module: ''
  returns:
  - dynamic_type: Tensor
    name: self
    type: Tensor &
  inplace: true
  is_factory_method: null
  abstract: false
  requires_tensor: false
  device_guard: true
  with_gil: false
  deprecated: false
- name: instance_norm
  operator_name: instance_norm
  overload_name: ''
  use_c10_dispatcher: unboxed_only
  category_override: ''
  matches_jit_signature: true
  schema_string: aten::instance_norm(Tensor input, Tensor? weight, Tensor? bias, Tensor? running_mean, Tensor? running_var, bool use_input_stats, float momentum, float eps, bool cudnn_enabled) -> Tensor
  method_prefix_derived: ''
  arguments:
  - annotation: null
    dynamic_type: Tensor
    is_nullable: false
    name: input
    type: const Tensor &
  - annotation: null
    dynamic_type: Tensor
    is_nullable: true
    name: weight
    type: const Tensor &
  - annotation: null
    dynamic_type: Tensor
    is_nullable: true
    name: bias
    type: const Tensor &
  - annotation: null
    dynamic_type: Tensor
    is_nullable: true
    name: running_mean
    type: const Tensor &
  - annotation: null
    dynamic_type: Tensor
    is_nullable: true
    name: running_var
    type: const Tensor &
  - annotation: null
    dynamic_type: bool
    is_nullable: false
    name: use_input_stats
    type: bool
  - annotation: null
    dynamic_type: double
    is_nullable: false
    name: momentum
    type: double
  - annotation: null
    dynamic_type: double
    is_nullable: false
    name: eps
    type: double
  - annotation: null
    dynamic_type: bool
    is_nullable: false
    name: cudnn_enabled
    type: bool
  method_of:
  - Type
  - namespace
  mode: native
  python_module: ''
  returns:
  - dynamic_type: Tensor
    name: result
    type: Tensor
  inplace: false
  is_factory_method: null
  abstract: false
  requires_tensor: false
  device_guard: true
  with_gil: false
  deprecated: false
- name: inverse
  operator_name: inverse
  overload_name: ''
  use_c10_dispatcher: full
  category_override: ''
  matches_jit_signature: true
  schema_string: aten::inverse(Tensor self) -> Tensor
  method_prefix_derived: ''
  arguments:
  - annotation: null
    dynamic_type: Tensor
    is_nullable: false
    name: self
    type: const Tensor &
  method_of:
  - Type
  - Tensor
  - namespace
  mode: native
  python_module: ''
  returns:
  - dynamic_type: Tensor
    name: result
    type: Tensor
  inplace: false
  is_factory_method: null
  abstract: false
  requires_tensor: false
  device_guard: true
  with_gil: false
  deprecated: false
- name: inverse_out
  operator_name: inverse
  overload_name: out
  use_c10_dispatcher: unboxed_only
  category_override: ''
  matches_jit_signature: true
  schema_string: aten::inverse.out(Tensor self, *, Tensor(a!) out) -> Tensor(a!)
  method_prefix_derived: ''
  arguments:
  - allocate: true
    annotation: a!
    dynamic_type: Tensor
    is_nullable: false
    kwarg_only: false
    name: out
    output: true
    type: Tensor &
  - annotation: null
    dynamic_type: Tensor
    is_nullable: false
    name: self
    type: const Tensor &
  method_of:
  - Type
  - namespace
  mode: native
  python_module: ''
  returns:
  - dynamic_type: Tensor
    name: out
    type: Tensor &
  inplace: false
  is_factory_method: null
  abstract: false
  requires_tensor: false
  device_guard: true
  with_gil: false
  deprecated: false
- name: _inverse_helper
  operator_name: _inverse_helper
  overload_name: ''
  use_c10_dispatcher: full
  category_override: ''
  matches_jit_signature: true
  schema_string: aten::_inverse_helper(Tensor self) -> Tensor
  method_prefix_derived: ''
  arguments:
  - annotation: null
    dynamic_type: Tensor
    is_nullable: false
    name: self
    type: const Tensor &
  method_of:
  - Type
  - namespace
  mode: native
  python_module: ''
  returns:
  - dynamic_type: Tensor
    name: result
    type: Tensor
  inplace: false
  is_factory_method: null
  abstract: true
  requires_tensor: false
  device_guard: true
  with_gil: false
  deprecated: false
- name: isclose
  operator_name: isclose
  overload_name: ''
  use_c10_dispatcher: full
  category_override: ''
  matches_jit_signature: true
  schema_string: aten::isclose(Tensor self, Tensor other, float rtol=1e-05, float atol=1e-08, bool equal_nan=False) -> Tensor
  method_prefix_derived: ''
  arguments:
  - annotation: null
    dynamic_type: Tensor
    is_nullable: false
    name: self
    type: const Tensor &
  - annotation: null
    dynamic_type: Tensor
    is_nullable: false
    name: other
    type: const Tensor &
  - annotation: null
    default: 1.0e-05
    dynamic_type: double
    is_nullable: false
    name: rtol
    type: double
  - annotation: null
    default: 1.0e-08
    dynamic_type: double
    is_nullable: false
    name: atol
    type: double
  - annotation: null
    default: false
    dynamic_type: bool
    is_nullable: false
    name: equal_nan
    type: bool
  method_of:
  - Type
  - Tensor
  - namespace
  mode: native
  python_module: ''
  returns:
  - dynamic_type: Tensor
    name: result
    type: Tensor
  inplace: false
  is_factory_method: null
  abstract: false
  requires_tensor: false
  device_guard: true
  with_gil: false
  deprecated: false
- name: isnan
  operator_name: isnan
  overload_name: ''
  use_c10_dispatcher: full
  category_override: ''
  matches_jit_signature: true
  schema_string: aten::isnan(Tensor self) -> Tensor
  method_prefix_derived: ''
  arguments:
  - annotation: null
    dynamic_type: Tensor
    is_nullable: false
    name: self
    type: const Tensor &
  method_of:
  - Type
  - namespace
  mode: native
  python_module: ''
  returns:
  - dynamic_type: Tensor
    name: result
    type: Tensor
  inplace: false
  is_factory_method: null
  abstract: false
  requires_tensor: false
  device_guard: false
  with_gil: false
  deprecated: false
- name: is_distributed
  operator_name: is_distributed
  overload_name: ''
  use_c10_dispatcher: full
  category_override: ''
  matches_jit_signature: true
  schema_string: aten::is_distributed(Tensor self) -> bool
  method_prefix_derived: ''
  arguments:
  - annotation: null
    dynamic_type: Tensor
    is_nullable: false
    name: self
    type: const Tensor &
  method_of:
  - Type
  - Tensor
  - namespace
  mode: native
  python_module: ''
  returns:
  - dynamic_type: bool
    name: result
    type: bool
  inplace: false
  is_factory_method: null
  abstract: false
  requires_tensor: false
  device_guard: false
  with_gil: false
  deprecated: false
- name: is_floating_point
  operator_name: is_floating_point
  overload_name: ''
  use_c10_dispatcher: full
  category_override: ''
  matches_jit_signature: true
  schema_string: aten::is_floating_point(Tensor self) -> bool
  method_prefix_derived: ''
  arguments:
  - annotation: null
    dynamic_type: Tensor
    is_nullable: false
    name: self
    type: const Tensor &
  method_of:
  - Type
  - Tensor
  - namespace
  mode: native
  python_module: ''
  returns:
  - dynamic_type: bool
    name: result
    type: bool
  inplace: false
  is_factory_method: null
  abstract: false
  requires_tensor: false
  device_guard: false
  with_gil: false
  deprecated: false
- name: is_complex
  operator_name: is_complex
  overload_name: ''
  use_c10_dispatcher: full
  category_override: ''
  matches_jit_signature: true
  schema_string: aten::is_complex(Tensor self) -> bool
  method_prefix_derived: ''
  arguments:
  - annotation: null
    dynamic_type: Tensor
    is_nullable: false
    name: self
    type: const Tensor &
  method_of:
  - Type
  - Tensor
  - namespace
  mode: native
  python_module: ''
  returns:
  - dynamic_type: bool
    name: result
    type: bool
  inplace: false
  is_factory_method: null
  abstract: false
  requires_tensor: false
  device_guard: false
  with_gil: false
  deprecated: false
- name: is_nonzero
  operator_name: is_nonzero
  overload_name: ''
  use_c10_dispatcher: full
  category_override: ''
  matches_jit_signature: true
  schema_string: aten::is_nonzero(Tensor self) -> bool
  method_prefix_derived: ''
  arguments:
  - annotation: null
    dynamic_type: Tensor
    is_nullable: false
    name: self
    type: const Tensor &
  method_of:
  - Type
  - Tensor
  - namespace
  mode: native
  python_module: ''
  returns:
  - dynamic_type: bool
    name: result
    type: bool
  inplace: false
  is_factory_method: null
  abstract: false
  requires_tensor: false
  device_guard: false
  with_gil: false
  deprecated: false
- name: is_same_size
  operator_name: is_same_size
  overload_name: ''
  use_c10_dispatcher: full
  category_override: ''
  matches_jit_signature: true
  schema_string: aten::is_same_size(Tensor self, Tensor other) -> bool
  method_prefix_derived: ''
  arguments:
  - annotation: null
    dynamic_type: Tensor
    is_nullable: false
    name: self
    type: const Tensor &
  - annotation: null
    dynamic_type: Tensor
    is_nullable: false
    name: other
    type: const Tensor &
  method_of:
  - Type
  - Tensor
  - namespace
  mode: native
  python_module: ''
  returns:
  - dynamic_type: bool
    name: result
    type: bool
  inplace: false
  is_factory_method: null
  abstract: false
  requires_tensor: false
  device_guard: false
  with_gil: false
  deprecated: false
- name: is_signed
  operator_name: is_signed
  overload_name: ''
  use_c10_dispatcher: full
  category_override: ''
  matches_jit_signature: true
  schema_string: aten::is_signed(Tensor self) -> bool
  method_prefix_derived: ''
  arguments:
  - annotation: null
    dynamic_type: Tensor
    is_nullable: false
    name: self
    type: const Tensor &
  method_of:
  - Type
  - Tensor
  - namespace
  mode: native
  python_module: ''
  returns:
  - dynamic_type: bool
    name: result
    type: bool
  inplace: false
  is_factory_method: null
  abstract: false
  requires_tensor: false
  device_guard: false
  with_gil: false
  deprecated: false
- name: kl_div
  operator_name: kl_div
  overload_name: ''
  use_c10_dispatcher: full
  category_override: ''
  matches_jit_signature: true
  schema_string: aten::kl_div(Tensor self, Tensor target, int reduction=Mean) -> Tensor
  method_prefix_derived: ''
  arguments:
  - annotation: null
    dynamic_type: Tensor
    is_nullable: false
    name: self
    type: const Tensor &
  - annotation: null
    dynamic_type: Tensor
    is_nullable: false
    name: target
    type: const Tensor &
  - annotation: null
    default: at::Reduction::Mean
    dynamic_type: int64_t
    is_nullable: false
    name: reduction
    type: int64_t
  method_of:
  - Type
  - namespace
  mode: native
  python_module: ''
  returns:
  - dynamic_type: Tensor
    name: result
    type: Tensor
  inplace: false
  is_factory_method: null
  abstract: false
  requires_tensor: false
  device_guard: true
  with_gil: false
  deprecated: false
- name: kl_div_backward
  operator_name: kl_div_backward
  overload_name: ''
  use_c10_dispatcher: full
  category_override: ''
  matches_jit_signature: true
  schema_string: aten::kl_div_backward(Tensor grad_output, Tensor self, Tensor target, int reduction=Mean) -> Tensor
  method_prefix_derived: ''
  arguments:
  - annotation: null
    dynamic_type: Tensor
    is_nullable: false
    name: grad_output
    type: const Tensor &
  - annotation: null
    dynamic_type: Tensor
    is_nullable: false
    name: self
    type: const Tensor &
  - annotation: null
    dynamic_type: Tensor
    is_nullable: false
    name: target
    type: const Tensor &
  - annotation: null
    default: at::Reduction::Mean
    dynamic_type: int64_t
    is_nullable: false
    name: reduction
    type: int64_t
  method_of:
  - Type
  - namespace
  mode: native
  python_module: ''
  returns:
  - dynamic_type: Tensor
    name: result
    type: Tensor
  inplace: false
  is_factory_method: null
  abstract: true
  requires_tensor: false
  device_guard: true
  with_gil: false
  deprecated: false
- name: kthvalue
  operator_name: kthvalue
  overload_name: ''
  use_c10_dispatcher: unboxed_only
  category_override: ''
  matches_jit_signature: true
  schema_string: aten::kthvalue(Tensor self, int k, int dim=-1, bool keepdim=False) -> (Tensor values, Tensor indices)
  method_prefix_derived: ''
  arguments:
  - annotation: null
    dynamic_type: Tensor
    is_nullable: false
    name: self
    type: const Tensor &
  - annotation: null
    dynamic_type: int64_t
    is_nullable: false
    name: k
    type: int64_t
  - annotation: null
    default: -1
    dynamic_type: int64_t
    is_nullable: false
    name: dim
    type: int64_t
  - annotation: null
    default: false
    dynamic_type: bool
    is_nullable: false
    name: keepdim
    type: bool
  method_of:
  - Type
  - Tensor
  - namespace
  mode: native
  python_module: ''
  returns:
  - dynamic_type: Tensor
    field_name: values
    name: values
    type: Tensor
  - dynamic_type: Tensor
    field_name: indices
    name: indices
    type: Tensor
  inplace: false
  is_factory_method: null
  abstract: false
  requires_tensor: false
  device_guard: true
  with_gil: false
  deprecated: false
- name: kthvalue_out
  operator_name: kthvalue
  overload_name: values
  use_c10_dispatcher: unboxed_only
  category_override: ''
  matches_jit_signature: true
  schema_string: aten::kthvalue.values(Tensor self, int k, int dim=-1, bool keepdim=False, *, Tensor(a!) values, Tensor(b!) indices) -> (Tensor(a!) values, Tensor(b!) indices)
  method_prefix_derived: ''
  arguments:
  - allocate: true
    annotation: a!
    dynamic_type: Tensor
    field_name: values
    is_nullable: false
    kwarg_only: false
    name: values
    output: true
    type: Tensor &
  - allocate: true
    annotation: b!
    dynamic_type: Tensor
    field_name: indices
    is_nullable: false
    kwarg_only: false
    name: indices
    output: true
    type: Tensor &
  - annotation: null
    dynamic_type: Tensor
    is_nullable: false
    name: self
    type: const Tensor &
  - annotation: null
    dynamic_type: int64_t
    is_nullable: false
    name: k
    type: int64_t
  - annotation: null
    default: -1
    dynamic_type: int64_t
    is_nullable: false
    name: dim
    type: int64_t
  - annotation: null
    default: false
    dynamic_type: bool
    is_nullable: false
    name: keepdim
    type: bool
  method_of:
  - Type
  - namespace
  mode: native
  python_module: ''
  returns:
  - dynamic_type: Tensor
    field_name: values
    name: values
    type: Tensor &
  - dynamic_type: Tensor
    field_name: indices
    name: indices
    type: Tensor &
  inplace: false
  is_factory_method: null
  abstract: true
  requires_tensor: false
  device_guard: true
  with_gil: false
  deprecated: false
- name: kthvalue
  operator_name: kthvalue
  overload_name: dimname
  use_c10_dispatcher: unboxed_only
  category_override: ''
  matches_jit_signature: true
  schema_string: aten::kthvalue.dimname(Tensor self, int k, Dimname dim, bool keepdim=False) -> (Tensor values, Tensor indices)
  method_prefix_derived: ''
  arguments:
  - annotation: null
    dynamic_type: Tensor
    is_nullable: false
    name: self
    type: const Tensor &
  - annotation: null
    dynamic_type: int64_t
    is_nullable: false
    name: k
    type: int64_t
  - annotation: null
    dynamic_type: Dimname
    is_nullable: false
    name: dim
    type: Dimname
  - annotation: null
    default: false
    dynamic_type: bool
    is_nullable: false
    name: keepdim
    type: bool
  method_of:
  - Type
  - Tensor
  - namespace
  mode: native
  python_module: ''
  returns:
  - dynamic_type: Tensor
    field_name: values
    name: values
    type: Tensor
  - dynamic_type: Tensor
    field_name: indices
    name: indices
    type: Tensor
  inplace: false
  is_factory_method: null
  abstract: false
  requires_tensor: false
  device_guard: true
  with_gil: false
  deprecated: false
- name: kthvalue_out
  operator_name: kthvalue
  overload_name: dimname_out
  use_c10_dispatcher: unboxed_only
  category_override: ''
  matches_jit_signature: true
  schema_string: aten::kthvalue.dimname_out(Tensor self, int k, Dimname dim, bool keepdim=False, *, Tensor(a!) values, Tensor(b!) indices) -> (Tensor(a!) values, Tensor(b!) indices)
  method_prefix_derived: ''
  arguments:
  - allocate: true
    annotation: a!
    dynamic_type: Tensor
    field_name: values
    is_nullable: false
    kwarg_only: false
    name: values
    output: true
    type: Tensor &
  - allocate: true
    annotation: b!
    dynamic_type: Tensor
    field_name: indices
    is_nullable: false
    kwarg_only: false
    name: indices
    output: true
    type: Tensor &
  - annotation: null
    dynamic_type: Tensor
    is_nullable: false
    name: self
    type: const Tensor &
  - annotation: null
    dynamic_type: int64_t
    is_nullable: false
    name: k
    type: int64_t
  - annotation: null
    dynamic_type: Dimname
    is_nullable: false
    name: dim
    type: Dimname
  - annotation: null
    default: false
    dynamic_type: bool
    is_nullable: false
    name: keepdim
    type: bool
  method_of:
  - Type
  - namespace
  mode: native
  python_module: ''
  returns:
  - dynamic_type: Tensor
    field_name: values
    name: values
    type: Tensor &
  - dynamic_type: Tensor
    field_name: indices
    name: indices
    type: Tensor &
  inplace: false
  is_factory_method: null
  abstract: false
  requires_tensor: false
  device_guard: true
  with_gil: false
  deprecated: false
- name: layer_norm
  operator_name: layer_norm
  overload_name: ''
  use_c10_dispatcher: unboxed_only
  category_override: ''
  matches_jit_signature: true
  schema_string: aten::layer_norm(Tensor input, int[] normalized_shape, Tensor? weight=None, Tensor? bias=None, float eps=1e-05, bool cudnn_enable=True) -> Tensor
  method_prefix_derived: ''
  arguments:
  - annotation: null
    dynamic_type: Tensor
    is_nullable: false
    name: input
    type: const Tensor &
  - annotation: null
    dynamic_type: IntArrayRef
    is_nullable: false
    name: normalized_shape
    type: IntArrayRef
  - annotation: null
    default: '{}'
    dynamic_type: Tensor
    is_nullable: true
    name: weight
    type: const Tensor &
  - annotation: null
    default: '{}'
    dynamic_type: Tensor
    is_nullable: true
    name: bias
    type: const Tensor &
  - annotation: null
    default: 1.0e-05
    dynamic_type: double
    is_nullable: false
    name: eps
    type: double
  - annotation: null
    default: true
    dynamic_type: bool
    is_nullable: false
    name: cudnn_enable
    type: bool
  method_of:
  - Type
  - namespace
  mode: native
  python_module: ''
  returns:
  - dynamic_type: Tensor
    name: result
    type: Tensor
  inplace: false
  is_factory_method: null
  abstract: false
  requires_tensor: false
  device_guard: true
  with_gil: false
  deprecated: false
- name: native_layer_norm
  operator_name: native_layer_norm
  overload_name: ''
  use_c10_dispatcher: unboxed_only
  category_override: ''
  matches_jit_signature: true
  schema_string: aten::native_layer_norm(Tensor input, Tensor? weight, Tensor? bias, int M, int N, float eps) -> (Tensor, Tensor, Tensor)
  method_prefix_derived: ''
  arguments:
  - annotation: null
    dynamic_type: Tensor
    is_nullable: false
    name: input
    type: const Tensor &
  - annotation: null
    dynamic_type: Tensor
    is_nullable: true
    name: weight
    type: const Tensor &
  - annotation: null
    dynamic_type: Tensor
    is_nullable: true
    name: bias
    type: const Tensor &
  - annotation: null
    dynamic_type: int64_t
    is_nullable: false
    name: M
    type: int64_t
  - annotation: null
    dynamic_type: int64_t
    is_nullable: false
    name: N
    type: int64_t
  - annotation: null
    dynamic_type: double
    is_nullable: false
    name: eps
    type: double
  method_of:
  - Type
  - namespace
  mode: native
  python_module: ''
  returns:
  - dynamic_type: Tensor
    name: result0
    type: Tensor
  - dynamic_type: Tensor
    name: result1
    type: Tensor
  - dynamic_type: Tensor
    name: result2
    type: Tensor
  inplace: false
  is_factory_method: null
  abstract: true
  requires_tensor: false
  device_guard: true
  with_gil: false
  deprecated: false
- name: native_layer_norm_backward
  operator_name: native_layer_norm_backward
  overload_name: ''
  use_c10_dispatcher: unboxed_only
  category_override: ''
  matches_jit_signature: true
  schema_string: aten::native_layer_norm_backward(Tensor grad_out, Tensor input, Tensor mean, Tensor rstd, Tensor? weight, int M, int N, bool[3] output_mask) -> (Tensor, Tensor, Tensor)
  method_prefix_derived: ''
  arguments:
  - annotation: null
    dynamic_type: Tensor
    is_nullable: false
    name: grad_out
    type: const Tensor &
  - annotation: null
    dynamic_type: Tensor
    is_nullable: false
    name: input
    type: const Tensor &
  - annotation: null
    dynamic_type: Tensor
    is_nullable: false
    name: mean
    type: const Tensor &
  - annotation: null
    dynamic_type: Tensor
    is_nullable: false
    name: rstd
    type: const Tensor &
  - annotation: null
    dynamic_type: Tensor
    is_nullable: true
    name: weight
    type: const Tensor &
  - annotation: null
    dynamic_type: int64_t
    is_nullable: false
    name: M
    type: int64_t
  - annotation: null
    dynamic_type: int64_t
    is_nullable: false
    name: N
    type: int64_t
  - annotation: null
    dynamic_type: std::array<bool,3>
    is_nullable: false
    name: output_mask
    type: std::array<bool,3>
  method_of:
  - Type
  - namespace
  mode: native
  python_module: ''
  returns:
  - dynamic_type: Tensor
    name: result0
    type: Tensor
  - dynamic_type: Tensor
    name: result1
    type: Tensor
  - dynamic_type: Tensor
    name: result2
    type: Tensor
  inplace: false
  is_factory_method: null
  abstract: true
  requires_tensor: false
  device_guard: true
  with_gil: false
  deprecated: false
- name: linear
  operator_name: linear
  overload_name: ''
  use_c10_dispatcher: unboxed_only
  category_override: ''
  matches_jit_signature: true
  schema_string: aten::linear(Tensor input, Tensor weight, Tensor? bias=None) -> Tensor
  method_prefix_derived: ''
  arguments:
  - annotation: null
    dynamic_type: Tensor
    is_nullable: false
    name: input
    type: const Tensor &
  - annotation: null
    dynamic_type: Tensor
    is_nullable: false
    name: weight
    type: const Tensor &
  - annotation: null
    default: '{}'
    dynamic_type: Tensor
    is_nullable: true
    name: bias
    type: const Tensor &
  method_of:
  - Type
  - namespace
  mode: native
  python_module: nn
  returns:
  - dynamic_type: Tensor
    name: result
    type: Tensor
  inplace: false
  is_factory_method: null
  abstract: false
  requires_tensor: false
  device_guard: true
  with_gil: false
  deprecated: false
- name: mkldnn_linear
  operator_name: mkldnn_linear
  overload_name: ''
  use_c10_dispatcher: unboxed_only
  category_override: ''
  matches_jit_signature: true
  schema_string: aten::mkldnn_linear(Tensor input, Tensor weight, Tensor? bias=None) -> Tensor
  method_prefix_derived: ''
  arguments:
  - annotation: null
    dynamic_type: Tensor
    is_nullable: false
    name: input
    type: const Tensor &
  - annotation: null
    dynamic_type: Tensor
    is_nullable: false
    name: weight
    type: const Tensor &
  - annotation: null
    default: '{}'
    dynamic_type: Tensor
    is_nullable: true
    name: bias
    type: const Tensor &
  method_of:
  - Type
  - namespace
  mode: native
  python_module: nn
  returns:
  - dynamic_type: Tensor
    name: result
    type: Tensor
  inplace: false
  is_factory_method: null
  abstract: true
  requires_tensor: false
  device_guard: true
  with_gil: false
  deprecated: false
- name: fbgemm_linear_int8_weight_fp32_activation
  operator_name: fbgemm_linear_int8_weight_fp32_activation
  overload_name: ''
  use_c10_dispatcher: unboxed_only
  category_override: ''
  matches_jit_signature: true
  schema_string: aten::fbgemm_linear_int8_weight_fp32_activation(Tensor input, Tensor weight, Tensor packed, Tensor col_offsets, Scalar weight_scale, Scalar weight_zero_point, Tensor bias) -> Tensor
  method_prefix_derived: ''
  arguments:
  - annotation: null
    dynamic_type: Tensor
    is_nullable: false
    name: input
    type: const Tensor &
  - annotation: null
    dynamic_type: Tensor
    is_nullable: false
    name: weight
    type: const Tensor &
  - annotation: null
    dynamic_type: Tensor
    is_nullable: false
    name: packed
    type: const Tensor &
  - annotation: null
    dynamic_type: Tensor
    is_nullable: false
    name: col_offsets
    type: const Tensor &
  - annotation: null
    dynamic_type: Scalar
    is_nullable: false
    name: weight_scale
    type: Scalar
  - annotation: null
    dynamic_type: Scalar
    is_nullable: false
    name: weight_zero_point
    type: Scalar
  - annotation: null
    dynamic_type: Tensor
    is_nullable: false
    name: bias
    type: const Tensor &
  method_of:
  - Type
  - namespace
  mode: native
  python_module: ''
  returns:
  - dynamic_type: Tensor
    name: result
    type: Tensor
  inplace: false
  is_factory_method: null
  abstract: false
  requires_tensor: false
  device_guard: true
  with_gil: false
  deprecated: false
- name: fbgemm_linear_int8_weight
  operator_name: fbgemm_linear_int8_weight
  overload_name: ''
  use_c10_dispatcher: full
  category_override: ''
  matches_jit_signature: true
  schema_string: aten::fbgemm_linear_int8_weight(Tensor input, Tensor weight, Tensor packed, Tensor col_offsets, Scalar weight_scale, Scalar weight_zero_point, Tensor bias) -> Tensor
  method_prefix_derived: ''
  arguments:
  - annotation: null
    dynamic_type: Tensor
    is_nullable: false
    name: input
    type: const Tensor &
  - annotation: null
    dynamic_type: Tensor
    is_nullable: false
    name: weight
    type: const Tensor &
  - annotation: null
    dynamic_type: Tensor
    is_nullable: false
    name: packed
    type: const Tensor &
  - annotation: null
    dynamic_type: Tensor
    is_nullable: false
    name: col_offsets
    type: const Tensor &
  - annotation: null
    dynamic_type: Scalar
    is_nullable: false
    name: weight_scale
    type: Scalar
  - annotation: null
    dynamic_type: Scalar
    is_nullable: false
    name: weight_zero_point
    type: Scalar
  - annotation: null
    dynamic_type: Tensor
    is_nullable: false
    name: bias
    type: const Tensor &
  method_of:
  - Type
  - namespace
  mode: native
  python_module: ''
  returns:
  - dynamic_type: Tensor
    name: result
    type: Tensor
  inplace: false
  is_factory_method: null
  abstract: false
  requires_tensor: false
  device_guard: true
  with_gil: false
  deprecated: false
- name: fbgemm_linear_quantize_weight
  operator_name: fbgemm_linear_quantize_weight
  overload_name: ''
  use_c10_dispatcher: unboxed_only
  category_override: ''
  matches_jit_signature: true
  schema_string: aten::fbgemm_linear_quantize_weight(Tensor input) -> (Tensor, Tensor, float, int)
  method_prefix_derived: ''
  arguments:
  - annotation: null
    dynamic_type: Tensor
    is_nullable: false
    name: input
    type: const Tensor &
  method_of:
  - Type
  - namespace
  mode: native
  python_module: ''
  returns:
  - dynamic_type: Tensor
    name: result0
    type: Tensor
  - dynamic_type: Tensor
    name: result1
    type: Tensor
  - dynamic_type: double
    name: result2
    type: double
  - dynamic_type: int64_t
    name: result3
    type: int64_t
  inplace: false
  is_factory_method: null
  abstract: false
  requires_tensor: false
  device_guard: true
  with_gil: false
  deprecated: false
- name: fbgemm_pack_gemm_matrix_fp16
  operator_name: fbgemm_pack_gemm_matrix_fp16
  overload_name: ''
  use_c10_dispatcher: full
  category_override: ''
  matches_jit_signature: true
  schema_string: aten::fbgemm_pack_gemm_matrix_fp16(Tensor input) -> Tensor
  method_prefix_derived: ''
  arguments:
  - annotation: null
    dynamic_type: Tensor
    is_nullable: false
    name: input
    type: const Tensor &
  method_of:
  - Type
  - namespace
  mode: native
  python_module: ''
  returns:
  - dynamic_type: Tensor
    name: result
    type: Tensor
  inplace: false
  is_factory_method: null
  abstract: false
  requires_tensor: false
  device_guard: true
  with_gil: false
  deprecated: false
- name: fbgemm_linear_fp16_weight_fp32_activation
  operator_name: fbgemm_linear_fp16_weight_fp32_activation
  overload_name: ''
  use_c10_dispatcher: unboxed_only
  category_override: ''
  matches_jit_signature: true
  schema_string: aten::fbgemm_linear_fp16_weight_fp32_activation(Tensor input, Tensor packed_weight, Tensor bias) -> Tensor
  method_prefix_derived: ''
  arguments:
  - annotation: null
    dynamic_type: Tensor
    is_nullable: false
    name: input
    type: const Tensor &
  - annotation: null
    dynamic_type: Tensor
    is_nullable: false
    name: packed_weight
    type: const Tensor &
  - annotation: null
    dynamic_type: Tensor
    is_nullable: false
    name: bias
    type: const Tensor &
  method_of:
  - Type
  - namespace
  mode: native
  python_module: ''
  returns:
  - dynamic_type: Tensor
    name: result
    type: Tensor
  inplace: false
  is_factory_method: null
  abstract: false
  requires_tensor: false
  device_guard: true
  with_gil: false
  deprecated: false
- name: fbgemm_linear_fp16_weight
  operator_name: fbgemm_linear_fp16_weight
  overload_name: ''
  use_c10_dispatcher: full
  category_override: ''
  matches_jit_signature: true
  schema_string: aten::fbgemm_linear_fp16_weight(Tensor input, Tensor packed_weight, Tensor bias) -> Tensor
  method_prefix_derived: ''
  arguments:
  - annotation: null
    dynamic_type: Tensor
    is_nullable: false
    name: input
    type: const Tensor &
  - annotation: null
    dynamic_type: Tensor
    is_nullable: false
    name: packed_weight
    type: const Tensor &
  - annotation: null
    dynamic_type: Tensor
    is_nullable: false
    name: bias
    type: const Tensor &
  method_of:
  - Type
  - namespace
  mode: native
  python_module: ''
  returns:
  - dynamic_type: Tensor
    name: result
    type: Tensor
  inplace: false
  is_factory_method: null
  abstract: false
  requires_tensor: false
  device_guard: true
  with_gil: false
  deprecated: false
- name: fbgemm_pack_quantized_matrix
  operator_name: fbgemm_pack_quantized_matrix
  overload_name: ''
  use_c10_dispatcher: full
  category_override: ''
  matches_jit_signature: true
  schema_string: aten::fbgemm_pack_quantized_matrix(Tensor input) -> Tensor
  method_prefix_derived: ''
  arguments:
  - annotation: null
    dynamic_type: Tensor
    is_nullable: false
    name: input
    type: const Tensor &
  method_of:
  - Type
  - namespace
  mode: native
  python_module: ''
  returns:
  - dynamic_type: Tensor
    name: result
    type: Tensor
  inplace: false
  is_factory_method: null
  abstract: false
  requires_tensor: false
  device_guard: true
  with_gil: false
  deprecated: false
- name: fbgemm_pack_quantized_matrix
  operator_name: fbgemm_pack_quantized_matrix
  overload_name: KN
  use_c10_dispatcher: full
  category_override: ''
  matches_jit_signature: true
  schema_string: aten::fbgemm_pack_quantized_matrix.KN(Tensor input, int K, int N) -> Tensor
  method_prefix_derived: ''
  arguments:
  - annotation: null
    dynamic_type: Tensor
    is_nullable: false
    name: input
    type: const Tensor &
  - annotation: null
    dynamic_type: int64_t
    is_nullable: false
    name: K
    type: int64_t
  - annotation: null
    dynamic_type: int64_t
    is_nullable: false
    name: N
    type: int64_t
  method_of:
  - Type
  - namespace
  mode: native
  python_module: ''
  returns:
  - dynamic_type: Tensor
    name: result
    type: Tensor
  inplace: false
  is_factory_method: null
  abstract: false
  requires_tensor: false
  device_guard: true
  with_gil: false
  deprecated: false
- name: linspace
  operator_name: linspace
  overload_name: ''
  use_c10_dispatcher: unboxed_only
  category_override: ''
  matches_jit_signature: true
  schema_string: aten::linspace(Scalar start, Scalar end, int steps=100, *, ScalarType? dtype=None, Layout? layout=None, Device? device=None, bool? pin_memory=None) -> Tensor
  method_prefix_derived: ''
  arguments:
  - annotation: null
    dynamic_type: Scalar
    is_nullable: false
    name: start
    type: Scalar
  - annotation: null
    dynamic_type: Scalar
    is_nullable: false
    name: end
    type: Scalar
  - annotation: null
    default: 100
    dynamic_type: int64_t
    is_nullable: false
    name: steps
    type: int64_t
  - annotation: null
    default: '{}'
    dynamic_type: TensorOptions
    is_nullable: false
    kwarg_only: true
    name: options
    type: const TensorOptions &
  method_of:
  - Type
  - namespace
  mode: native
  python_module: ''
  returns:
  - dynamic_type: Tensor
    name: result
    type: Tensor
  inplace: false
  is_factory_method: true
  abstract: false
  requires_tensor: false
  device_guard: true
  with_gil: false
  deprecated: false
- name: linspace_out
  operator_name: linspace
  overload_name: out
  use_c10_dispatcher: unboxed_only
  category_override: ''
  matches_jit_signature: true
  schema_string: aten::linspace.out(Scalar start, Scalar end, int steps=100, *, Tensor(a!) out) -> Tensor(a!)
  method_prefix_derived: ''
  arguments:
  - allocate: true
    annotation: a!
    dynamic_type: Tensor
    is_nullable: false
    kwarg_only: false
    name: out
    output: true
    type: Tensor &
  - annotation: null
    dynamic_type: Scalar
    is_nullable: false
    name: start
    type: Scalar
  - annotation: null
    dynamic_type: Scalar
    is_nullable: false
    name: end
    type: Scalar
  - annotation: null
    default: 100
    dynamic_type: int64_t
    is_nullable: false
    name: steps
    type: int64_t
  method_of:
  - Type
  - namespace
  mode: native
  python_module: ''
  returns:
  - dynamic_type: Tensor
    name: out
    type: Tensor &
  inplace: false
  is_factory_method: null
  abstract: true
  requires_tensor: false
  device_guard: true
  with_gil: false
  deprecated: false
- name: log
  operator_name: log
  overload_name: ''
  use_c10_dispatcher: full
  category_override: ''
  matches_jit_signature: true
  schema_string: aten::log(Tensor self) -> Tensor
  method_prefix_derived: ''
  arguments:
  - annotation: null
    dynamic_type: Tensor
    is_nullable: false
    name: self
    type: const Tensor &
  method_of:
  - Type
  - Tensor
  - namespace
  mode: native
  python_module: ''
  returns:
  - dynamic_type: Tensor
    name: result
    type: Tensor
  inplace: false
  is_factory_method: null
  abstract: false
  requires_tensor: false
  device_guard: true
  with_gil: false
  deprecated: false
- name: log_
  operator_name: log_
  overload_name: ''
  use_c10_dispatcher: unboxed_only
  category_override: ''
  matches_jit_signature: true
  schema_string: aten::log_(Tensor(a!) self) -> Tensor(a!)
  method_prefix_derived: ''
  arguments:
  - annotation: a!
    dynamic_type: Tensor
    is_nullable: false
    name: self
    type: Tensor &
  method_of:
  - Type
  - Tensor
  - namespace
  mode: native
  python_module: ''
  returns:
  - dynamic_type: Tensor
    name: self
    type: Tensor &
  inplace: true
  is_factory_method: null
  abstract: false
  requires_tensor: false
  device_guard: true
  with_gil: false
  deprecated: false
- name: log_out
  operator_name: log
  overload_name: out
  use_c10_dispatcher: unboxed_only
  category_override: ''
  matches_jit_signature: true
  schema_string: aten::log.out(Tensor self, *, Tensor(a!) out) -> Tensor(a!)
  method_prefix_derived: ''
  arguments:
  - allocate: true
    annotation: a!
    dynamic_type: Tensor
    is_nullable: false
    kwarg_only: false
    name: out
    output: true
    type: Tensor &
  - annotation: null
    dynamic_type: Tensor
    is_nullable: false
    name: self
    type: const Tensor &
  method_of:
  - Type
  - namespace
  mode: native
  python_module: ''
  returns:
  - dynamic_type: Tensor
    name: out
    type: Tensor &
  inplace: false
  is_factory_method: null
  abstract: true
  requires_tensor: false
  device_guard: true
  with_gil: false
  deprecated: false
- name: log10
  operator_name: log10
  overload_name: ''
  use_c10_dispatcher: full
  category_override: ''
  matches_jit_signature: true
  schema_string: aten::log10(Tensor self) -> Tensor
  method_prefix_derived: ''
  arguments:
  - annotation: null
    dynamic_type: Tensor
    is_nullable: false
    name: self
    type: const Tensor &
  method_of:
  - Type
  - Tensor
  - namespace
  mode: native
  python_module: ''
  returns:
  - dynamic_type: Tensor
    name: result
    type: Tensor
  inplace: false
  is_factory_method: null
  abstract: false
  requires_tensor: false
  device_guard: true
  with_gil: false
  deprecated: false
- name: log10_
  operator_name: log10_
  overload_name: ''
  use_c10_dispatcher: unboxed_only
  category_override: ''
  matches_jit_signature: true
  schema_string: aten::log10_(Tensor(a!) self) -> Tensor(a!)
  method_prefix_derived: ''
  arguments:
  - annotation: a!
    dynamic_type: Tensor
    is_nullable: false
    name: self
    type: Tensor &
  method_of:
  - Type
  - Tensor
  - namespace
  mode: native
  python_module: ''
  returns:
  - dynamic_type: Tensor
    name: self
    type: Tensor &
  inplace: true
  is_factory_method: null
  abstract: false
  requires_tensor: false
  device_guard: true
  with_gil: false
  deprecated: false
- name: log10_out
  operator_name: log10
  overload_name: out
  use_c10_dispatcher: unboxed_only
  category_override: ''
  matches_jit_signature: true
  schema_string: aten::log10.out(Tensor self, *, Tensor(a!) out) -> Tensor(a!)
  method_prefix_derived: ''
  arguments:
  - allocate: true
    annotation: a!
    dynamic_type: Tensor
    is_nullable: false
    kwarg_only: false
    name: out
    output: true
    type: Tensor &
  - annotation: null
    dynamic_type: Tensor
    is_nullable: false
    name: self
    type: const Tensor &
  method_of:
  - Type
  - namespace
  mode: native
  python_module: ''
  returns:
  - dynamic_type: Tensor
    name: out
    type: Tensor &
  inplace: false
  is_factory_method: null
  abstract: true
  requires_tensor: false
  device_guard: true
  with_gil: false
  deprecated: false
- name: log1p
  operator_name: log1p
  overload_name: ''
  use_c10_dispatcher: full
  category_override: ''
  matches_jit_signature: true
  schema_string: aten::log1p(Tensor self) -> Tensor
  method_prefix_derived: ''
  arguments:
  - annotation: null
    dynamic_type: Tensor
    is_nullable: false
    name: self
    type: const Tensor &
  method_of:
  - Type
  - Tensor
  - namespace
  mode: native
  python_module: ''
  returns:
  - dynamic_type: Tensor
    name: result
    type: Tensor
  inplace: false
  is_factory_method: null
  abstract: false
  requires_tensor: false
  device_guard: true
  with_gil: false
  deprecated: false
- name: log1p_
  operator_name: log1p_
  overload_name: ''
  use_c10_dispatcher: unboxed_only
  category_override: ''
  matches_jit_signature: true
  schema_string: aten::log1p_(Tensor(a!) self) -> Tensor(a!)
  method_prefix_derived: ''
  arguments:
  - annotation: a!
    dynamic_type: Tensor
    is_nullable: false
    name: self
    type: Tensor &
  method_of:
  - Type
  - Tensor
  - namespace
  mode: native
  python_module: ''
  returns:
  - dynamic_type: Tensor
    name: self
    type: Tensor &
  inplace: true
  is_factory_method: null
  abstract: true
  requires_tensor: false
  device_guard: true
  with_gil: false
  deprecated: false
- name: log1p_out
  operator_name: log1p
  overload_name: out
  use_c10_dispatcher: unboxed_only
  category_override: ''
  matches_jit_signature: true
  schema_string: aten::log1p.out(Tensor self, *, Tensor(a!) out) -> Tensor(a!)
  method_prefix_derived: ''
  arguments:
  - allocate: true
    annotation: a!
    dynamic_type: Tensor
    is_nullable: false
    kwarg_only: false
    name: out
    output: true
    type: Tensor &
  - annotation: null
    dynamic_type: Tensor
    is_nullable: false
    name: self
    type: const Tensor &
  method_of:
  - Type
  - namespace
  mode: native
  python_module: ''
  returns:
  - dynamic_type: Tensor
    name: out
    type: Tensor &
  inplace: false
  is_factory_method: null
  abstract: true
  requires_tensor: false
  device_guard: true
  with_gil: false
  deprecated: false
- name: log2
  operator_name: log2
  overload_name: ''
  use_c10_dispatcher: full
  category_override: ''
  matches_jit_signature: true
  schema_string: aten::log2(Tensor self) -> Tensor
  method_prefix_derived: ''
  arguments:
  - annotation: null
    dynamic_type: Tensor
    is_nullable: false
    name: self
    type: const Tensor &
  method_of:
  - Type
  - Tensor
  - namespace
  mode: native
  python_module: ''
  returns:
  - dynamic_type: Tensor
    name: result
    type: Tensor
  inplace: false
  is_factory_method: null
  abstract: false
  requires_tensor: false
  device_guard: true
  with_gil: false
  deprecated: false
- name: log2_
  operator_name: log2_
  overload_name: ''
  use_c10_dispatcher: unboxed_only
  category_override: ''
  matches_jit_signature: true
  schema_string: aten::log2_(Tensor(a!) self) -> Tensor(a!)
  method_prefix_derived: ''
  arguments:
  - annotation: a!
    dynamic_type: Tensor
    is_nullable: false
    name: self
    type: Tensor &
  method_of:
  - Type
  - Tensor
  - namespace
  mode: native
  python_module: ''
  returns:
  - dynamic_type: Tensor
    name: self
    type: Tensor &
  inplace: true
  is_factory_method: null
  abstract: false
  requires_tensor: false
  device_guard: true
  with_gil: false
  deprecated: false
- name: log2_out
  operator_name: log2
  overload_name: out
  use_c10_dispatcher: unboxed_only
  category_override: ''
  matches_jit_signature: true
  schema_string: aten::log2.out(Tensor self, *, Tensor(a!) out) -> Tensor(a!)
  method_prefix_derived: ''
  arguments:
  - allocate: true
    annotation: a!
    dynamic_type: Tensor
    is_nullable: false
    kwarg_only: false
    name: out
    output: true
    type: Tensor &
  - annotation: null
    dynamic_type: Tensor
    is_nullable: false
    name: self
    type: const Tensor &
  method_of:
  - Type
  - namespace
  mode: native
  python_module: ''
  returns:
  - dynamic_type: Tensor
    name: out
    type: Tensor &
  inplace: false
  is_factory_method: null
  abstract: true
  requires_tensor: false
  device_guard: true
  with_gil: false
  deprecated: false
- name: logdet
  operator_name: logdet
  overload_name: ''
  use_c10_dispatcher: full
  category_override: ''
  matches_jit_signature: true
  schema_string: aten::logdet(Tensor self) -> Tensor
  method_prefix_derived: ''
  arguments:
  - annotation: null
    dynamic_type: Tensor
    is_nullable: false
    name: self
    type: const Tensor &
  method_of:
  - Type
  - Tensor
  - namespace
  mode: native
  python_module: ''
  returns:
  - dynamic_type: Tensor
    name: result
    type: Tensor
  inplace: false
  is_factory_method: null
  abstract: false
  requires_tensor: false
  device_guard: true
  with_gil: false
  deprecated: false
- name: logspace
  operator_name: logspace
  overload_name: ''
  use_c10_dispatcher: unboxed_only
  category_override: ''
  matches_jit_signature: true
  schema_string: aten::logspace(Scalar start, Scalar end, int steps=100, float base=10.0, *, ScalarType? dtype=None, Layout? layout=None, Device? device=None, bool? pin_memory=None) -> Tensor
  method_prefix_derived: ''
  arguments:
  - annotation: null
    dynamic_type: Scalar
    is_nullable: false
    name: start
    type: Scalar
  - annotation: null
    dynamic_type: Scalar
    is_nullable: false
    name: end
    type: Scalar
  - annotation: null
    default: 100
    dynamic_type: int64_t
    is_nullable: false
    name: steps
    type: int64_t
  - annotation: null
    default: 10.0
    dynamic_type: double
    is_nullable: false
    name: base
    type: double
  - annotation: null
    default: '{}'
    dynamic_type: TensorOptions
    is_nullable: false
    kwarg_only: true
    name: options
    type: const TensorOptions &
  method_of:
  - Type
  - namespace
  mode: native
  python_module: ''
  returns:
  - dynamic_type: Tensor
    name: result
    type: Tensor
  inplace: false
  is_factory_method: true
  abstract: false
  requires_tensor: false
  device_guard: true
  with_gil: false
  deprecated: false
- name: logspace_out
  operator_name: logspace
  overload_name: out
  use_c10_dispatcher: unboxed_only
  category_override: ''
  matches_jit_signature: true
  schema_string: aten::logspace.out(Scalar start, Scalar end, int steps=100, float base=10.0, *, Tensor(a!) out) -> Tensor(a!)
  method_prefix_derived: ''
  arguments:
  - allocate: true
    annotation: a!
    dynamic_type: Tensor
    is_nullable: false
    kwarg_only: false
    name: out
    output: true
    type: Tensor &
  - annotation: null
    dynamic_type: Scalar
    is_nullable: false
    name: start
    type: Scalar
  - annotation: null
    dynamic_type: Scalar
    is_nullable: false
    name: end
    type: Scalar
  - annotation: null
    default: 100
    dynamic_type: int64_t
    is_nullable: false
    name: steps
    type: int64_t
  - annotation: null
    default: 10.0
    dynamic_type: double
    is_nullable: false
    name: base
    type: double
  method_of:
  - Type
  - namespace
  mode: native
  python_module: ''
  returns:
  - dynamic_type: Tensor
    name: out
    type: Tensor &
  inplace: false
  is_factory_method: null
  abstract: true
  requires_tensor: false
  device_guard: true
  with_gil: false
  deprecated: false
- name: log_softmax
  operator_name: log_softmax
  overload_name: int
  use_c10_dispatcher: unboxed_only
  category_override: ''
  matches_jit_signature: true
  schema_string: aten::log_softmax.int(Tensor self, int dim, ScalarType? dtype=None) -> Tensor
  method_prefix_derived: ''
  arguments:
  - annotation: null
    dynamic_type: Tensor
    is_nullable: false
    name: self
    type: const Tensor &
  - annotation: null
    dynamic_type: int64_t
    is_nullable: false
    name: dim
    type: int64_t
  - annotation: null
    default: c10::nullopt
    dynamic_type: ScalarType
    is_nullable: true
    name: dtype
    type: c10::optional<ScalarType>
  method_of:
  - Type
  - Tensor
  - namespace
  mode: native
  python_module: ''
  returns:
  - dynamic_type: Tensor
    name: result
    type: Tensor
  inplace: false
  is_factory_method: null
  abstract: false
  requires_tensor: false
  device_guard: true
  with_gil: false
  deprecated: false
- name: log_softmax
  operator_name: log_softmax
  overload_name: Dimname
  use_c10_dispatcher: unboxed_only
  category_override: ''
  matches_jit_signature: true
  schema_string: aten::log_softmax.Dimname(Tensor self, Dimname dim, *, ScalarType? dtype=None) -> Tensor
  method_prefix_derived: ''
  arguments:
  - annotation: null
    dynamic_type: Tensor
    is_nullable: false
    name: self
    type: const Tensor &
  - annotation: null
    dynamic_type: Dimname
    is_nullable: false
    name: dim
    type: Dimname
  - annotation: null
    default: c10::nullopt
    dynamic_type: ScalarType
    is_nullable: true
    kwarg_only: true
    name: dtype
    type: c10::optional<ScalarType>
  method_of:
  - Type
  - Tensor
  - namespace
  mode: native
  python_module: ''
  returns:
  - dynamic_type: Tensor
    name: result
    type: Tensor
  inplace: false
  is_factory_method: null
  abstract: false
  requires_tensor: false
  device_guard: true
  with_gil: false
  deprecated: false
- name: _log_softmax
  operator_name: _log_softmax
  overload_name: ''
  use_c10_dispatcher: full
  category_override: ''
  matches_jit_signature: true
  schema_string: aten::_log_softmax(Tensor self, int dim, bool half_to_float) -> Tensor
  method_prefix_derived: ''
  arguments:
  - annotation: null
    dynamic_type: Tensor
    is_nullable: false
    name: self
    type: const Tensor &
  - annotation: null
    dynamic_type: int64_t
    is_nullable: false
    name: dim
    type: int64_t
  - annotation: null
    dynamic_type: bool
    is_nullable: false
    name: half_to_float
    type: bool
  method_of:
  - Type
  - namespace
  mode: native
  python_module: ''
  returns:
  - dynamic_type: Tensor
    name: result
    type: Tensor
  inplace: false
  is_factory_method: null
  abstract: true
  requires_tensor: false
  device_guard: true
  with_gil: false
  deprecated: false
- name: _log_softmax_backward_data
  operator_name: _log_softmax_backward_data
  overload_name: ''
  use_c10_dispatcher: full
  category_override: ''
  matches_jit_signature: true
  schema_string: aten::_log_softmax_backward_data(Tensor grad_output, Tensor output, int dim, Tensor self) -> Tensor
  method_prefix_derived: ''
  arguments:
  - annotation: null
    dynamic_type: Tensor
    is_nullable: false
    name: grad_output
    type: const Tensor &
  - annotation: null
    dynamic_type: Tensor
    is_nullable: false
    name: output
    type: const Tensor &
  - annotation: null
    dynamic_type: int64_t
    is_nullable: false
    name: dim
    type: int64_t
  - annotation: null
    dynamic_type: Tensor
    is_nullable: false
    name: self
    type: const Tensor &
  method_of:
  - Type
  - namespace
  mode: native
  python_module: ''
  returns:
  - dynamic_type: Tensor
    name: result
    type: Tensor
  inplace: false
  is_factory_method: null
  abstract: true
  requires_tensor: false
  device_guard: true
  with_gil: false
  deprecated: false
- name: logsumexp
  operator_name: logsumexp
  overload_name: ''
  use_c10_dispatcher: unboxed_only
  category_override: ''
  matches_jit_signature: true
  schema_string: aten::logsumexp(Tensor self, int[1] dim, bool keepdim=False) -> Tensor
  method_prefix_derived: ''
  arguments:
  - annotation: null
    dynamic_type: Tensor
    is_nullable: false
    name: self
    type: const Tensor &
  - annotation: null
    dynamic_type: IntArrayRef
    is_nullable: false
    name: dim
    size: 1
    type: IntArrayRef
  - annotation: null
    default: false
    dynamic_type: bool
    is_nullable: false
    name: keepdim
    type: bool
  method_of:
  - Type
  - Tensor
  - namespace
  mode: native
  python_module: ''
  returns:
  - dynamic_type: Tensor
    name: result
    type: Tensor
  inplace: false
  is_factory_method: null
  abstract: false
  requires_tensor: false
  device_guard: true
  with_gil: false
  deprecated: false
- name: logsumexp_out
  operator_name: logsumexp
  overload_name: out
  use_c10_dispatcher: unboxed_only
  category_override: ''
  matches_jit_signature: true
  schema_string: aten::logsumexp.out(Tensor self, int[1] dim, bool keepdim=False, *, Tensor(a!) out) -> Tensor(a!)
  method_prefix_derived: ''
  arguments:
  - allocate: true
    annotation: a!
    dynamic_type: Tensor
    is_nullable: false
    kwarg_only: false
    name: out
    output: true
    type: Tensor &
  - annotation: null
    dynamic_type: Tensor
    is_nullable: false
    name: self
    type: const Tensor &
  - annotation: null
    dynamic_type: IntArrayRef
    is_nullable: false
    name: dim
    size: 1
    type: IntArrayRef
  - annotation: null
    default: false
    dynamic_type: bool
    is_nullable: false
    name: keepdim
    type: bool
  method_of:
  - Type
  - namespace
  mode: native
  python_module: ''
  returns:
  - dynamic_type: Tensor
    name: out
    type: Tensor &
  inplace: false
  is_factory_method: null
  abstract: false
  requires_tensor: false
  device_guard: true
  with_gil: false
  deprecated: false
- name: logsumexp
  operator_name: logsumexp
  overload_name: names
  use_c10_dispatcher: unboxed_only
  category_override: ''
  matches_jit_signature: true
  schema_string: aten::logsumexp.names(Tensor self, Dimname[1] dim, bool keepdim=False) -> Tensor
  method_prefix_derived: ''
  arguments:
  - annotation: null
    dynamic_type: Tensor
    is_nullable: false
    name: self
    type: const Tensor &
  - annotation: null
    dynamic_type: DimnameList
    is_nullable: false
    name: dim
    size: 1
    type: DimnameList
  - annotation: null
    default: false
    dynamic_type: bool
    is_nullable: false
    name: keepdim
    type: bool
  method_of:
  - Type
  - Tensor
  - namespace
  mode: native
  python_module: ''
  returns:
  - dynamic_type: Tensor
    name: result
    type: Tensor
  inplace: false
  is_factory_method: null
  abstract: false
  requires_tensor: false
  device_guard: true
  with_gil: false
  deprecated: false
- name: logsumexp_out
  operator_name: logsumexp
  overload_name: names_out
  use_c10_dispatcher: unboxed_only
  category_override: ''
  matches_jit_signature: true
  schema_string: aten::logsumexp.names_out(Tensor self, Dimname[1] dim, bool keepdim=False, *, Tensor(a!) out) -> Tensor(a!)
  method_prefix_derived: ''
  arguments:
  - allocate: true
    annotation: a!
    dynamic_type: Tensor
    is_nullable: false
    kwarg_only: false
    name: out
    output: true
    type: Tensor &
  - annotation: null
    dynamic_type: Tensor
    is_nullable: false
    name: self
    type: const Tensor &
  - annotation: null
    dynamic_type: DimnameList
    is_nullable: false
    name: dim
    size: 1
    type: DimnameList
  - annotation: null
    default: false
    dynamic_type: bool
    is_nullable: false
    name: keepdim
    type: bool
  method_of:
  - Type
  - namespace
  mode: native
  python_module: ''
  returns:
  - dynamic_type: Tensor
    name: out
    type: Tensor &
  inplace: false
  is_factory_method: null
  abstract: false
  requires_tensor: false
  device_guard: true
  with_gil: false
  deprecated: false
- name: margin_ranking_loss
  operator_name: margin_ranking_loss
  overload_name: ''
  use_c10_dispatcher: full
  category_override: ''
  matches_jit_signature: true
  schema_string: aten::margin_ranking_loss(Tensor input1, Tensor input2, Tensor target, float margin=0.0, int reduction=Mean) -> Tensor
  method_prefix_derived: ''
  arguments:
  - annotation: null
    dynamic_type: Tensor
    is_nullable: false
    name: input1
    type: const Tensor &
  - annotation: null
    dynamic_type: Tensor
    is_nullable: false
    name: input2
    type: const Tensor &
  - annotation: null
    dynamic_type: Tensor
    is_nullable: false
    name: target
    type: const Tensor &
  - annotation: null
    default: 0.0
    dynamic_type: double
    is_nullable: false
    name: margin
    type: double
  - annotation: null
    default: at::Reduction::Mean
    dynamic_type: int64_t
    is_nullable: false
    name: reduction
    type: int64_t
  method_of:
  - Type
  - namespace
  mode: native
  python_module: ''
  returns:
  - dynamic_type: Tensor
    name: result
    type: Tensor
  inplace: false
  is_factory_method: null
  abstract: false
  requires_tensor: false
  device_guard: true
  with_gil: false
  deprecated: false
- name: matmul
  operator_name: matmul
  overload_name: ''
  use_c10_dispatcher: full
  category_override: ''
  matches_jit_signature: true
  schema_string: aten::matmul(Tensor self, Tensor other) -> Tensor
  method_prefix_derived: ''
  arguments:
  - annotation: null
    dynamic_type: Tensor
    is_nullable: false
    name: self
    type: const Tensor &
  - annotation: null
    dynamic_type: Tensor
    is_nullable: false
    name: other
    type: const Tensor &
  method_of:
  - Type
  - Tensor
  - namespace
  mode: native
  python_module: ''
  returns:
  - dynamic_type: Tensor
    name: result
    type: Tensor
  inplace: false
  is_factory_method: null
  abstract: false
  requires_tensor: false
  device_guard: true
  with_gil: false
  deprecated: false
- name: matmul_out
  operator_name: matmul
  overload_name: out
  use_c10_dispatcher: unboxed_only
  category_override: ''
  matches_jit_signature: true
  schema_string: aten::matmul.out(Tensor self, Tensor other, *, Tensor(a!) out) -> Tensor(a!)
  method_prefix_derived: ''
  arguments:
  - allocate: true
    annotation: a!
    dynamic_type: Tensor
    is_nullable: false
    kwarg_only: false
    name: out
    output: true
    type: Tensor &
  - annotation: null
    dynamic_type: Tensor
    is_nullable: false
    name: self
    type: const Tensor &
  - annotation: null
    dynamic_type: Tensor
    is_nullable: false
    name: other
    type: const Tensor &
  method_of:
  - Type
  - namespace
  mode: native
  python_module: ''
  returns:
  - dynamic_type: Tensor
    name: out
    type: Tensor &
  inplace: false
  is_factory_method: null
  abstract: false
  requires_tensor: false
  device_guard: true
  with_gil: false
  deprecated: false
- name: matrix_rank
  operator_name: matrix_rank
  overload_name: tol
  use_c10_dispatcher: full
  category_override: ''
  matches_jit_signature: true
  schema_string: aten::matrix_rank.tol(Tensor self, float tol, bool symmetric=False) -> Tensor
  method_prefix_derived: ''
  arguments:
  - annotation: null
    dynamic_type: Tensor
    is_nullable: false
    name: self
    type: const Tensor &
  - annotation: null
    dynamic_type: double
    is_nullable: false
    name: tol
    type: double
  - annotation: null
    default: false
    dynamic_type: bool
    is_nullable: false
    name: symmetric
    type: bool
  method_of:
  - Type
  - namespace
  mode: native
  python_module: ''
  returns:
  - dynamic_type: Tensor
    name: result
    type: Tensor
  inplace: false
  is_factory_method: null
  abstract: false
  requires_tensor: false
  device_guard: true
  with_gil: false
  deprecated: false
- name: matrix_rank
  operator_name: matrix_rank
  overload_name: ''
  use_c10_dispatcher: full
  category_override: ''
  matches_jit_signature: true
  schema_string: aten::matrix_rank(Tensor self, bool symmetric=False) -> Tensor
  method_prefix_derived: ''
  arguments:
  - annotation: null
    dynamic_type: Tensor
    is_nullable: false
    name: self
    type: const Tensor &
  - annotation: null
    default: false
    dynamic_type: bool
    is_nullable: false
    name: symmetric
    type: bool
  method_of:
  - Type
  - namespace
  mode: native
  python_module: ''
  returns:
  - dynamic_type: Tensor
    name: result
    type: Tensor
  inplace: false
  is_factory_method: null
  abstract: false
  requires_tensor: false
  device_guard: true
  with_gil: false
  deprecated: false
- name: matrix_power
  operator_name: matrix_power
  overload_name: ''
  use_c10_dispatcher: full
  category_override: ''
  matches_jit_signature: true
  schema_string: aten::matrix_power(Tensor self, int n) -> Tensor
  method_prefix_derived: ''
  arguments:
  - annotation: null
    dynamic_type: Tensor
    is_nullable: false
    name: self
    type: const Tensor &
  - annotation: null
    dynamic_type: int64_t
    is_nullable: false
    name: n
    type: int64_t
  method_of:
  - Type
  - Tensor
  - namespace
  mode: native
  python_module: ''
  returns:
  - dynamic_type: Tensor
    name: result
    type: Tensor
  inplace: false
  is_factory_method: null
  abstract: false
  requires_tensor: false
  device_guard: true
  with_gil: false
  deprecated: false
- name: max
  operator_name: max
  overload_name: dim
  use_c10_dispatcher: unboxed_only
  category_override: ''
  matches_jit_signature: true
  schema_string: aten::max.dim(Tensor self, int dim, bool keepdim=False) -> (Tensor values, Tensor indices)
  method_prefix_derived: ''
  arguments:
  - annotation: null
    dynamic_type: Tensor
    is_nullable: false
    name: self
    type: const Tensor &
  - annotation: null
    dynamic_type: int64_t
    is_nullable: false
    name: dim
    type: int64_t
  - annotation: null
    default: false
    dynamic_type: bool
    is_nullable: false
    name: keepdim
    type: bool
  method_of:
  - Type
  - Tensor
  - namespace
  mode: native
  python_module: ''
  returns:
  - dynamic_type: Tensor
    field_name: values
    name: values
    type: Tensor
  - dynamic_type: Tensor
    field_name: indices
    name: indices
    type: Tensor
  inplace: false
  is_factory_method: null
  abstract: false
  requires_tensor: false
  device_guard: true
  with_gil: false
  deprecated: false
- name: max_out
  operator_name: max
  overload_name: dim_max
  use_c10_dispatcher: unboxed_only
  category_override: ''
  matches_jit_signature: true
  schema_string: aten::max.dim_max(Tensor self, int dim, bool keepdim=False, *, Tensor(a!) max, Tensor(b!) max_values) -> (Tensor(a!) values, Tensor(b!) indices)
  method_prefix_derived: ''
  arguments:
  - allocate: true
    annotation: a!
    dynamic_type: Tensor
    field_name: values
    is_nullable: false
    kwarg_only: false
    name: max
    output: true
    type: Tensor &
  - allocate: true
    annotation: b!
    dynamic_type: Tensor
    field_name: indices
    is_nullable: false
    kwarg_only: false
    name: max_values
    output: true
    type: Tensor &
  - annotation: null
    dynamic_type: Tensor
    is_nullable: false
    name: self
    type: const Tensor &
  - annotation: null
    dynamic_type: int64_t
    is_nullable: false
    name: dim
    type: int64_t
  - annotation: null
    default: false
    dynamic_type: bool
    is_nullable: false
    name: keepdim
    type: bool
  method_of:
  - Type
  - namespace
  mode: native
  python_module: ''
  returns:
  - dynamic_type: Tensor
    field_name: values
    name: max
    type: Tensor &
  - dynamic_type: Tensor
    field_name: indices
    name: max_values
    type: Tensor &
  inplace: false
  is_factory_method: null
  abstract: false
  requires_tensor: false
  device_guard: true
  with_gil: false
  deprecated: false
- name: max_values
  operator_name: max_values
  overload_name: ''
  use_c10_dispatcher: unboxed_only
  category_override: ''
  matches_jit_signature: true
  schema_string: aten::max_values(Tensor self, int[1] dim, bool keepdim=False) -> Tensor
  method_prefix_derived: ''
  arguments:
  - annotation: null
    dynamic_type: Tensor
    is_nullable: false
    name: self
    type: const Tensor &
  - annotation: null
    dynamic_type: IntArrayRef
    is_nullable: false
    name: dim
    size: 1
    type: IntArrayRef
  - annotation: null
    default: false
    dynamic_type: bool
    is_nullable: false
    name: keepdim
    type: bool
  method_of:
  - Type
  - Tensor
  - namespace
  mode: native
  python_module: ''
  returns:
  - dynamic_type: Tensor
    name: result
    type: Tensor
  inplace: false
  is_factory_method: null
  abstract: false
  requires_tensor: false
  device_guard: true
  with_gil: false
  deprecated: false
- name: max
  operator_name: max
  overload_name: names_dim
  use_c10_dispatcher: unboxed_only
  category_override: ''
  matches_jit_signature: true
  schema_string: aten::max.names_dim(Tensor self, Dimname dim, bool keepdim=False) -> (Tensor values, Tensor indices)
  method_prefix_derived: ''
  arguments:
  - annotation: null
    dynamic_type: Tensor
    is_nullable: false
    name: self
    type: const Tensor &
  - annotation: null
    dynamic_type: Dimname
    is_nullable: false
    name: dim
    type: Dimname
  - annotation: null
    default: false
    dynamic_type: bool
    is_nullable: false
    name: keepdim
    type: bool
  method_of:
  - Type
  - Tensor
  - namespace
  mode: native
  python_module: ''
  returns:
  - dynamic_type: Tensor
    field_name: values
    name: values
    type: Tensor
  - dynamic_type: Tensor
    field_name: indices
    name: indices
    type: Tensor
  inplace: false
  is_factory_method: null
  abstract: false
  requires_tensor: false
  device_guard: true
  with_gil: false
  deprecated: false
- name: max_out
  operator_name: max
  overload_name: names_dim_max
  use_c10_dispatcher: unboxed_only
  category_override: ''
  matches_jit_signature: true
  schema_string: aten::max.names_dim_max(Tensor self, Dimname dim, bool keepdim=False, *, Tensor(a!) max, Tensor(b!) max_values) -> (Tensor(a!) values, Tensor(b!) indices)
  method_prefix_derived: ''
  arguments:
  - allocate: true
    annotation: a!
    dynamic_type: Tensor
    field_name: values
    is_nullable: false
    kwarg_only: false
    name: max
    output: true
    type: Tensor &
  - allocate: true
    annotation: b!
    dynamic_type: Tensor
    field_name: indices
    is_nullable: false
    kwarg_only: false
    name: max_values
    output: true
    type: Tensor &
  - annotation: null
    dynamic_type: Tensor
    is_nullable: false
    name: self
    type: const Tensor &
  - annotation: null
    dynamic_type: Dimname
    is_nullable: false
    name: dim
    type: Dimname
  - annotation: null
    default: false
    dynamic_type: bool
    is_nullable: false
    name: keepdim
    type: bool
  method_of:
  - Type
  - namespace
  mode: native
  python_module: ''
  returns:
  - dynamic_type: Tensor
    field_name: values
    name: max
    type: Tensor &
  - dynamic_type: Tensor
    field_name: indices
    name: max_values
    type: Tensor &
  inplace: false
  is_factory_method: null
  abstract: false
  requires_tensor: false
  device_guard: true
  with_gil: false
  deprecated: false
- name: max_values
  operator_name: max_values
  overload_name: names
  use_c10_dispatcher: unboxed_only
  category_override: ''
  matches_jit_signature: true
  schema_string: aten::max_values.names(Tensor self, Dimname[1] dim, bool keepdim=False) -> Tensor
  method_prefix_derived: ''
  arguments:
  - annotation: null
    dynamic_type: Tensor
    is_nullable: false
    name: self
    type: const Tensor &
  - annotation: null
    dynamic_type: DimnameList
    is_nullable: false
    name: dim
    size: 1
    type: DimnameList
  - annotation: null
    default: false
    dynamic_type: bool
    is_nullable: false
    name: keepdim
    type: bool
  method_of:
  - Type
  - Tensor
  - namespace
  mode: native
  python_module: ''
  returns:
  - dynamic_type: Tensor
    name: result
    type: Tensor
  inplace: false
  is_factory_method: null
  abstract: false
  requires_tensor: false
  device_guard: true
  with_gil: false
  deprecated: false
- name: max_pool1d_with_indices
  operator_name: max_pool1d_with_indices
  overload_name: ''
  use_c10_dispatcher: unboxed_only
  category_override: ''
  matches_jit_signature: true
  schema_string: aten::max_pool1d_with_indices(Tensor self, int[1] kernel_size, int[1] stride=[], int[1] padding=0, int[1] dilation=1, bool ceil_mode=False) -> (Tensor, Tensor)
  method_prefix_derived: ''
  arguments:
  - annotation: null
    dynamic_type: Tensor
    is_nullable: false
    name: self
    type: const Tensor &
  - annotation: null
    dynamic_type: IntArrayRef
    is_nullable: false
    name: kernel_size
    size: 1
    type: IntArrayRef
  - annotation: null
    default: '{}'
    dynamic_type: IntArrayRef
    is_nullable: false
    name: stride
    size: 1
    type: IntArrayRef
  - annotation: null
    default: 0
    dynamic_type: IntArrayRef
    is_nullable: false
    name: padding
    size: 1
    type: IntArrayRef
  - annotation: null
    default: 1
    dynamic_type: IntArrayRef
    is_nullable: false
    name: dilation
    size: 1
    type: IntArrayRef
  - annotation: null
    default: false
    dynamic_type: bool
    is_nullable: false
    name: ceil_mode
    type: bool
  method_of:
  - Type
  - namespace
  mode: native
  python_module: ''
  returns:
  - dynamic_type: Tensor
    name: result0
    type: Tensor
  - dynamic_type: Tensor
    name: result1
    type: Tensor
  inplace: false
  is_factory_method: null
  abstract: false
  requires_tensor: false
  device_guard: true
  with_gil: false
  deprecated: false
- name: max_pool1d
  operator_name: max_pool1d
  overload_name: ''
  use_c10_dispatcher: unboxed_only
  category_override: ''
  matches_jit_signature: true
  schema_string: aten::max_pool1d(Tensor self, int[1] kernel_size, int[1] stride=[], int[1] padding=0, int[1] dilation=1, bool ceil_mode=False) -> Tensor
  method_prefix_derived: ''
  arguments:
  - annotation: null
    dynamic_type: Tensor
    is_nullable: false
    name: self
    type: const Tensor &
  - annotation: null
    dynamic_type: IntArrayRef
    is_nullable: false
    name: kernel_size
    size: 1
    type: IntArrayRef
  - annotation: null
    default: '{}'
    dynamic_type: IntArrayRef
    is_nullable: false
    name: stride
    size: 1
    type: IntArrayRef
  - annotation: null
    default: 0
    dynamic_type: IntArrayRef
    is_nullable: false
    name: padding
    size: 1
    type: IntArrayRef
  - annotation: null
    default: 1
    dynamic_type: IntArrayRef
    is_nullable: false
    name: dilation
    size: 1
    type: IntArrayRef
  - annotation: null
    default: false
    dynamic_type: bool
    is_nullable: false
    name: ceil_mode
    type: bool
  method_of:
  - Type
  - namespace
  mode: native
  python_module: ''
  returns:
  - dynamic_type: Tensor
    name: result
    type: Tensor
  inplace: false
  is_factory_method: null
  abstract: false
  requires_tensor: false
  device_guard: true
  with_gil: false
  deprecated: false
- name: max_pool2d
  operator_name: max_pool2d
  overload_name: ''
  use_c10_dispatcher: unboxed_only
  category_override: ''
  matches_jit_signature: true
  schema_string: aten::max_pool2d(Tensor self, int[2] kernel_size, int[2] stride=[], int[2] padding=0, int[2] dilation=1, bool ceil_mode=False) -> Tensor
  method_prefix_derived: ''
  arguments:
  - annotation: null
    dynamic_type: Tensor
    is_nullable: false
    name: self
    type: const Tensor &
  - annotation: null
    dynamic_type: IntArrayRef
    is_nullable: false
    name: kernel_size
    size: 2
    type: IntArrayRef
  - annotation: null
    default: '{}'
    dynamic_type: IntArrayRef
    is_nullable: false
    name: stride
    size: 2
    type: IntArrayRef
  - annotation: null
    default: 0
    dynamic_type: IntArrayRef
    is_nullable: false
    name: padding
    size: 2
    type: IntArrayRef
  - annotation: null
    default: 1
    dynamic_type: IntArrayRef
    is_nullable: false
    name: dilation
    size: 2
    type: IntArrayRef
  - annotation: null
    default: false
    dynamic_type: bool
    is_nullable: false
    name: ceil_mode
    type: bool
  method_of:
  - Type
  - namespace
  mode: native
  python_module: ''
  returns:
  - dynamic_type: Tensor
    name: result
    type: Tensor
  inplace: false
  is_factory_method: null
  abstract: false
  requires_tensor: false
  device_guard: true
  with_gil: false
  deprecated: false
- name: mkldnn_max_pool2d
  operator_name: mkldnn_max_pool2d
  overload_name: ''
  use_c10_dispatcher: unboxed_only
  category_override: ''
  matches_jit_signature: true
  schema_string: aten::mkldnn_max_pool2d(Tensor self, int[2] kernel_size, int[2] stride=[], int[2] padding=0, int[2] dilation=1, bool ceil_mode=False) -> Tensor
  method_prefix_derived: ''
  arguments:
  - annotation: null
    dynamic_type: Tensor
    is_nullable: false
    name: self
    type: const Tensor &
  - annotation: null
    dynamic_type: IntArrayRef
    is_nullable: false
    name: kernel_size
    size: 2
    type: IntArrayRef
  - annotation: null
    default: '{}'
    dynamic_type: IntArrayRef
    is_nullable: false
    name: stride
    size: 2
    type: IntArrayRef
  - annotation: null
    default: 0
    dynamic_type: IntArrayRef
    is_nullable: false
    name: padding
    size: 2
    type: IntArrayRef
  - annotation: null
    default: 1
    dynamic_type: IntArrayRef
    is_nullable: false
    name: dilation
    size: 2
    type: IntArrayRef
  - annotation: null
    default: false
    dynamic_type: bool
    is_nullable: false
    name: ceil_mode
    type: bool
  method_of:
  - Type
  - namespace
  mode: native
  python_module: ''
  returns:
  - dynamic_type: Tensor
    name: result
    type: Tensor
  inplace: false
  is_factory_method: null
  abstract: true
  requires_tensor: true
  device_guard: true
  with_gil: false
  deprecated: false
- name: quantized_max_pool2d
  operator_name: quantized_max_pool2d
  overload_name: ''
  use_c10_dispatcher: unboxed_only
  category_override: ''
  matches_jit_signature: true
  schema_string: aten::quantized_max_pool2d(Tensor self, int[2] kernel_size, int[2] stride=[], int[2] padding=0, int[2] dilation=1, bool ceil_mode=False) -> Tensor
  method_prefix_derived: ''
  arguments:
  - annotation: null
    dynamic_type: Tensor
    is_nullable: false
    name: self
    type: const Tensor &
  - annotation: null
    dynamic_type: IntArrayRef
    is_nullable: false
    name: kernel_size
    size: 2
    type: IntArrayRef
  - annotation: null
    default: '{}'
    dynamic_type: IntArrayRef
    is_nullable: false
    name: stride
    size: 2
    type: IntArrayRef
  - annotation: null
    default: 0
    dynamic_type: IntArrayRef
    is_nullable: false
    name: padding
    size: 2
    type: IntArrayRef
  - annotation: null
    default: 1
    dynamic_type: IntArrayRef
    is_nullable: false
    name: dilation
    size: 2
    type: IntArrayRef
  - annotation: null
    default: false
    dynamic_type: bool
    is_nullable: false
    name: ceil_mode
    type: bool
  method_of:
  - Type
  - namespace
  mode: native
  python_module: ''
  returns:
  - dynamic_type: Tensor
    name: result
    type: Tensor
  inplace: false
  is_factory_method: null
  abstract: true
  requires_tensor: true
  device_guard: true
  with_gil: false
  deprecated: false
- name: max_pool3d
  operator_name: max_pool3d
  overload_name: ''
  use_c10_dispatcher: unboxed_only
  category_override: ''
  matches_jit_signature: true
  schema_string: aten::max_pool3d(Tensor self, int[3] kernel_size, int[3] stride=[], int[3] padding=0, int[3] dilation=1, bool ceil_mode=False) -> Tensor
  method_prefix_derived: ''
  arguments:
  - annotation: null
    dynamic_type: Tensor
    is_nullable: false
    name: self
    type: const Tensor &
  - annotation: null
    dynamic_type: IntArrayRef
    is_nullable: false
    name: kernel_size
    size: 3
    type: IntArrayRef
  - annotation: null
    default: '{}'
    dynamic_type: IntArrayRef
    is_nullable: false
    name: stride
    size: 3
    type: IntArrayRef
  - annotation: null
    default: 0
    dynamic_type: IntArrayRef
    is_nullable: false
    name: padding
    size: 3
    type: IntArrayRef
  - annotation: null
    default: 1
    dynamic_type: IntArrayRef
    is_nullable: false
    name: dilation
    size: 3
    type: IntArrayRef
  - annotation: null
    default: false
    dynamic_type: bool
    is_nullable: false
    name: ceil_mode
    type: bool
  method_of:
  - Type
  - namespace
  mode: native
  python_module: ''
  returns:
  - dynamic_type: Tensor
    name: result
    type: Tensor
  inplace: false
  is_factory_method: null
  abstract: false
  requires_tensor: false
  device_guard: true
  with_gil: false
  deprecated: false
- name: mean
  operator_name: mean
  overload_name: ''
  use_c10_dispatcher: unboxed_only
  category_override: ''
  matches_jit_signature: true
  schema_string: aten::mean(Tensor self, *, ScalarType? dtype=None) -> Tensor
  method_prefix_derived: ''
  arguments:
  - annotation: null
    dynamic_type: Tensor
    is_nullable: false
    name: self
    type: const Tensor &
  - annotation: null
    default: c10::nullopt
    dynamic_type: ScalarType
    is_nullable: true
    kwarg_only: true
    name: dtype
    type: c10::optional<ScalarType>
  method_of:
  - Type
  - Tensor
  - namespace
  mode: native
  python_module: ''
  returns:
  - dynamic_type: Tensor
    name: result
    type: Tensor
  inplace: false
  is_factory_method: null
  abstract: true
  requires_tensor: false
  device_guard: true
  with_gil: false
  deprecated: false
- name: mean
  operator_name: mean
  overload_name: dim
  use_c10_dispatcher: unboxed_only
  category_override: ''
  matches_jit_signature: true
  schema_string: aten::mean.dim(Tensor self, int[1] dim, bool keepdim=False, *, ScalarType? dtype=None) -> Tensor
  method_prefix_derived: ''
  arguments:
  - annotation: null
    dynamic_type: Tensor
    is_nullable: false
    name: self
    type: const Tensor &
  - annotation: null
    dynamic_type: IntArrayRef
    is_nullable: false
    name: dim
    size: 1
    type: IntArrayRef
  - annotation: null
    default: false
    dynamic_type: bool
    is_nullable: false
    name: keepdim
    type: bool
  - annotation: null
    default: c10::nullopt
    dynamic_type: ScalarType
    is_nullable: true
    kwarg_only: true
    name: dtype
    type: c10::optional<ScalarType>
  method_of:
  - Type
  - Tensor
  - namespace
  mode: native
  python_module: ''
  returns:
  - dynamic_type: Tensor
    name: result
    type: Tensor
  inplace: false
  is_factory_method: null
  abstract: true
  requires_tensor: false
  device_guard: true
  with_gil: false
  deprecated: false
- name: mean_out
  operator_name: mean
  overload_name: out
  use_c10_dispatcher: unboxed_only
  category_override: ''
  matches_jit_signature: true
  schema_string: aten::mean.out(Tensor self, int[1] dim, bool keepdim=False, *, ScalarType? dtype=None, Tensor(a!) out) -> Tensor(a!)
  method_prefix_derived: ''
  arguments:
  - allocate: true
    annotation: a!
    dynamic_type: Tensor
    is_nullable: false
    kwarg_only: false
    name: out
    output: true
    type: Tensor &
  - annotation: null
    dynamic_type: Tensor
    is_nullable: false
    name: self
    type: const Tensor &
  - annotation: null
    dynamic_type: IntArrayRef
    is_nullable: false
    name: dim
    size: 1
    type: IntArrayRef
  - annotation: null
    default: false
    dynamic_type: bool
    is_nullable: false
    name: keepdim
    type: bool
  - annotation: null
    default: c10::nullopt
    dynamic_type: ScalarType
    is_nullable: true
    kwarg_only: true
    name: dtype
    type: c10::optional<ScalarType>
  method_of:
  - Type
  - namespace
  mode: native
  python_module: ''
  returns:
  - dynamic_type: Tensor
    name: out
    type: Tensor &
  inplace: false
  is_factory_method: null
  abstract: true
  requires_tensor: false
  device_guard: true
  with_gil: false
  deprecated: false
- name: mean
  operator_name: mean
  overload_name: names_dim
  use_c10_dispatcher: unboxed_only
  category_override: ''
  matches_jit_signature: true
  schema_string: aten::mean.names_dim(Tensor self, Dimname[1] dim, bool keepdim=False, *, ScalarType? dtype=None) -> Tensor
  method_prefix_derived: ''
  arguments:
  - annotation: null
    dynamic_type: Tensor
    is_nullable: false
    name: self
    type: const Tensor &
  - annotation: null
    dynamic_type: DimnameList
    is_nullable: false
    name: dim
    size: 1
    type: DimnameList
  - annotation: null
    default: false
    dynamic_type: bool
    is_nullable: false
[truncated: 971,431 more chars]
