# Supplementary material
Source: ML conference proceedings conference paper supplement (https://proceedings.neurips.cc/paper_files/paper/2021/hash/d367eef13f90793bd8121e2f675f0dc2-Abstract.html)
Supplement: Supplementary file 1 [file d367eef13f90793bd8121e2f675f0dc2-Supplemental.zip › Scallop-Supplementary-camera-ready/code/tch-rs/third_party/pytorch/README]

The Declarations-B.yaml files included in this directory have been obtained
by compiling PyTorch from source using the code in branch B from the official
GitHub repo: https://github.com/pytorch/pytorch
