# Supplementary material
Source: ML conference proceedings conference paper supplement (https://proceedings.neurips.cc/paper_files/paper/2021/hash/d367eef13f90793bd8121e2f675f0dc2-Abstract.html)
Supplement: Supplementary file 1 [file d367eef13f90793bd8121e2f675f0dc2-Supplemental.zip › Scallop-Supplementary-camera-ready/code/tch-rs/torch-sys/libtch/CMakeLists.txt]

cmake_minimum_required(VERSION 3.5 FATAL_ERROR)
project(tch)

find_package(Torch REQUIRED)

add_library(tch STATIC torch_api.cpp)
target_link_libraries(tch "${TORCH_LIBRARIES}")
set_property(TARGET tch PROPERTY CXX_STANDARD 11)
install(TARGETS tch DESTINATION .)
