# Supplementary material
Source: ML conference proceedings conference paper supplement (https://proceedings.neurips.cc/paper_files/paper/2021/hash/d367eef13f90793bd8121e2f675f0dc2-Abstract.html)
Supplement: Supplementary file 1 [file d367eef13f90793bd8121e2f675f0dc2-Supplemental.zip › Scallop-Supplementary-camera-ready/code/tch-rs/torch-sys/libtch/dummy_cuda_dependency.cpp]

#include<stdio.h>
#include<stdint.h>
using namespace std;
extern "C" {
    void dummy_cuda_dependency();
}

struct cublasContext;

namespace at {
    namespace cuda {
        cublasContext* getCurrentCUDABlasHandle();
        int warp_size();
    }
}
char * magma_strerror(int err);
void dummy_cuda_dependency() {
    at::cuda::getCurrentCUDABlasHandle();
    at::cuda::warp_size();
}
