# Supplementary material
Source: ML conference proceedings conference paper supplement (https://proceedings.neurips.cc/paper_files/paper/2021/hash/d367eef13f90793bd8121e2f675f0dc2-Abstract.html)
Supplement: Supplementary file 1 [file d367eef13f90793bd8121e2f675f0dc2-Supplemental.zip › Scallop-Supplementary-camera-ready/code/tch-rs/torch-sys/src/c_generated.rs]

/* THIS FILE IS AUTOMATICALLY GENERATED, DO NOT EDIT BY HAND! */
#[allow(clippy::all)]
use crate::{C_scalar, C_tensor};
use libc::c_int;

extern "C" {
    pub fn atg___and__(out__: *mut *mut C_tensor, self_: *mut C_tensor, other_: *mut C_scalar);
    pub fn atg___and__1(out__: *mut *mut C_tensor, self_: *mut C_tensor, other_: *mut C_tensor);
    pub fn atg___iand__(out__: *mut *mut C_tensor, self_: *mut C_tensor, other_: *mut C_scalar);
    pub fn atg___iand__1(out__: *mut *mut C_tensor, self_: *mut C_tensor, other_: *mut C_tensor);
    pub fn atg___ilshift__(out__: *mut *mut C_tensor, self_: *mut C_tensor, other_: *mut C_scalar);
    pub fn atg___ilshift__1(out__: *mut *mut C_tensor, self_: *mut C_tensor, other_: *mut C_tensor);
    pub fn atg___ior__(out__: *mut *mut C_tensor, self_: *mut C_tensor, other_: *mut C_scalar);
    pub fn atg___ior__1(out__: *mut *mut C_tensor, self_: *mut C_tensor, other_: *mut C_tensor);
    pub fn atg___irshift__(out__: *mut *mut C_tensor, self_: *mut C_tensor, other_: *mut C_scalar);
    pub fn atg___irshift__1(out__: *mut *mut C_tensor, self_: *mut C_tensor, other_: *mut C_tensor);
    pub fn atg___ixor__(out__: *mut *mut C_tensor, self_: *mut C_tensor, other_: *mut C_scalar);
    pub fn atg___ixor__1(out__: *mut *mut C_tensor, self_: *mut C_tensor, other_: *mut C_tensor);
    pub fn atg___lshift__(out__: *mut *mut C_tensor, self_: *mut C_tensor, other_: *mut C_scalar);
    pub fn atg___lshift__1(out__: *mut *mut C_tensor, self_: *mut C_tensor, other_: *mut C_tensor);
    pub fn atg___or__(out__: *mut *mut C_tensor, self_: *mut C_tensor, other_: *mut C_scalar);
    pub fn atg___or__1(out__: *mut *mut C_tensor, self_: *mut C_tensor, other_: *mut C_tensor);
    pub fn atg___rshift__(out__: *mut *mut C_tensor, self_: *mut C_tensor, other_: *mut C_scalar);
    pub fn atg___rshift__1(out__: *mut *mut C_tensor, self_: *mut C_tensor, other_: *mut C_tensor);
    pub fn atg___xor__(out__: *mut *mut C_tensor, self_: *mut C_tensor, other_: *mut C_scalar);
    pub fn atg___xor__1(out__: *mut *mut C_tensor, self_: *mut C_tensor, other_: *mut C_tensor);
    pub fn atg__adaptive_avg_pool2d(
        out__: *mut *mut C_tensor,
        self_: *mut C_tensor,
        output_size_data: *const i64,
        output_size_len: c_int,
    );
    pub fn atg__adaptive_avg_pool2d_backward(
        out__: *mut *mut C_tensor,
        grad_output_: *mut C_tensor,
        self_: *mut C_tensor,
    );
    pub fn atg__add_batch_dim(
        out__: *mut *mut C_tensor,
        self_: *mut C_tensor,
        batch_dim_: i64,
        level_: i64,
    );
    pub fn atg__add_relu(out__: *mut *mut C_tensor, self_: *mut C_tensor, other_: *mut C_tensor);
    pub fn atg__add_relu_(out__: *mut *mut C_tensor, self_: *mut C_tensor, other_: *mut C_tensor);
    pub fn atg__add_relu_out(
        out__: *mut *mut C_tensor,
        out_: *mut C_tensor,
        self_: *mut C_tensor,
        other_: *mut C_tensor,
    );
    pub fn atg__addmv_impl_(
        out__: *mut *mut C_tensor,
        self_: *mut C_tensor,
        self2_: *mut C_tensor,
        mat_: *mut C_tensor,
        vec_: *mut C_tensor,
    );
    pub fn atg__aminmax(out__: *mut *mut C_tensor, self_: *mut C_tensor);
    pub fn atg__aminmax1(
        out__: *mut *mut C_tensor,
        self_: *mut C_tensor,
        dim_: i64,
        keepdim_: c_int,
    );
    pub fn atg__amp_update_scale(
        out__: *mut *mut C_tensor,
        growth_tracker_: *mut C_tensor,
        current_scale_: *mut C_tensor,
        found_inf_: *mut C_tensor,
        scale_growth_factor_: f64,
        scale_backoff_factor_: f64,
        growth_interval_: i64,
    );
    pub fn atg__baddbmm_mkl_(
        out__: *mut *mut C_tensor,
        self_: *mut C_tensor,
        batch1_: *mut C_tensor,
        batch2_: *mut C_tensor,
    );
    pub fn atg__bmm(
        out__: *mut *mut C_tensor,
        self_: *mut C_tensor,
        mat2_: *mut C_tensor,
        deterministic_: c_int,
    );
    pub fn atg__bmm_out(
        out__: *mut *mut C_tensor,
        out_: *mut C_tensor,
        self_: *mut C_tensor,
        mat2_: *mut C_tensor,
        deterministic_: c_int,
    );
    pub fn atg__cast_byte(out__: *mut *mut C_tensor, self_: *mut C_tensor, non_blocking_: c_int);
    pub fn atg__cast_char(out__: *mut *mut C_tensor, self_: *mut C_tensor, non_blocking_: c_int);
    pub fn atg__cast_double(out__: *mut *mut C_tensor, self_: *mut C_tensor, non_blocking_: c_int);
    pub fn atg__cast_float(out__: *mut *mut C_tensor, self_: *mut C_tensor, non_blocking_: c_int);
    pub fn atg__cast_half(out__: *mut *mut C_tensor, self_: *mut C_tensor, non_blocking_: c_int);
    pub fn atg__cast_int(out__: *mut *mut C_tensor, self_: *mut C_tensor, non_blocking_: c_int);
    pub fn atg__cast_long(out__: *mut *mut C_tensor, self_: *mut C_tensor, non_blocking_: c_int);
    pub fn atg__cast_short(out__: *mut *mut C_tensor, self_: *mut C_tensor, non_blocking_: c_int);
    pub fn atg__cat(
        out__: *mut *mut C_tensor,
        tensors_data: *const *mut C_tensor,
        tensors_len: c_int,
        dim_: i64,
    );
    pub fn atg__cat_out(
        out__: *mut *mut C_tensor,
        out_: *mut C_tensor,
        tensors_data: *const *mut C_tensor,
        tensors_len: c_int,
        dim_: i64,
    );
    pub fn atg__cdist_backward(
        out__: *mut *mut C_tensor,
        grad_: *mut C_tensor,
        x1_: *mut C_tensor,
        x2_: *mut C_tensor,
        p_: f64,
        cdist_: *mut C_tensor,
    );
    pub fn atg__cholesky_helper(out__: *mut *mut C_tensor, self_: *mut C_tensor, upper_: c_int);
    pub fn atg__cholesky_solve_helper(
        out__: *mut *mut C_tensor,
        self_: *mut C_tensor,
        A_: *mut C_tensor,
        upper_: c_int,
    );
    pub fn atg__coalesced_(out__: *mut *mut C_tensor, self_: *mut C_tensor, coalesced_: c_int);
    pub fn atg__compute_linear_combination(
        out__: *mut *mut C_tensor,
        input_: *mut C_tensor,
        coefficients_: *mut C_tensor,
    );
    pub fn atg__compute_linear_combination_out(
        out__: *mut *mut C_tensor,
        out_: *mut C_tensor,
        input_: *mut C_tensor,
        coefficients_: *mut C_tensor,
    );
    pub fn atg__conj(out__: *mut *mut C_tensor, self_: *mut C_tensor);
    pub fn atg__convolution(
        out__: *mut *mut C_tensor,
        input_: *mut C_tensor,
        weight_: *mut C_tensor,
        bias_: *mut C_tensor,
        stride_data: *const i64,
        stride_len: c_int,
        padding_data: *const i64,
        padding_len: c_int,
        dilation_data: *const i64,
        dilation_len: c_int,
        transposed_: c_int,
        output_padding_data: *const i64,
        output_padding_len: c_int,
        groups_: i64,
        benchmark_: c_int,
        deterministic_: c_int,
        cudnn_enabled_: c_int,
    );
    pub fn atg__convolution1(
        out__: *mut *mut C_tensor,
        input_: *mut C_tensor,
        weight_: *mut C_tensor,
        bias_: *mut C_tensor,
        stride_data: *const i64,
        stride_len: c_int,
        padding_data: *const i64,
        padding_len: c_int,
        dilation_data: *const i64,
        dilation_len: c_int,
        transposed_: c_int,
        output_padding_data: *const i64,
        output_padding_len: c_int,
        groups_: i64,
        benchmark_: c_int,
        deterministic_: c_int,
        cudnn_enabled_: c_int,
        allow_tf32_: c_int,
    );
    pub fn atg__convolution_nogroup(
        out__: *mut *mut C_tensor,
        input_: *mut C_tensor,
        weight_: *mut C_tensor,
        bias_: *mut C_tensor,
        stride_data: *const i64,
        stride_len: c_int,
        padding_data: *const i64,
        padding_len: c_int,
        dilation_data: *const i64,
        dilation_len: c_int,
        transposed_: c_int,
        output_padding_data: *const i64,
        output_padding_len: c_int,
    );
    pub fn atg__copy_from(
        out__: *mut *mut C_tensor,
        self_: *mut C_tensor,
        dst_: *mut C_tensor,
        non_blocking_: c_int,
    );
    pub fn atg__ctc_loss(
        out__: *mut *mut C_tensor,
        log_probs_: *mut C_tensor,
        targets_: *mut C_tensor,
        input_lengths_data: *const i64,
        input_lengths_len: c_int,
        target_lengths_data: *const i64,
        target_lengths_len: c_int,
        blank_: i64,
        zero_infinity_: c_int,
    );
    pub fn atg__ctc_loss_backward(
        out__: *mut *mut C_tensor,
        grad_: *mut C_tensor,
        log_probs_: *mut C_tensor,
        targets_: *mut C_tensor,
        input_lengths_data: *const i64,
        input_lengths_len: c_int,
        target_lengths_data: *const i64,
        target_lengths_len: c_int,
        neg_log_likelihood_: *mut C_tensor,
        log_alpha_: *mut C_tensor,
        blank_: i64,
        zero_infinity_: c_int,
    );
    pub fn atg__cudnn_ctc_loss(
        out__: *mut *mut C_tensor,
        log_probs_: *mut C_tensor,
        targets_: *mut C_tensor,
        input_lengths_data: *const i64,
        input_lengths_len: c_int,
        target_lengths_data: *const i64,
        target_lengths_len: c_int,
        blank_: i64,
        deterministic_: c_int,
        zero_infinity_: c_int,
    );
    pub fn atg__cudnn_init_dropout_state(
        out__: *mut *mut C_tensor,
        dropout_: f64,
        train_: c_int,
        dropout_seed_: i64,
        options_kind: c_int,
        options_device: c_int,
    );
    pub fn atg__cudnn_rnn(
        out__: *mut *mut C_tensor,
        input_: *mut C_tensor,
        weight_data: *const *mut C_tensor,
        weight_len: c_int,
        weight_stride0_: i64,
        weight_buf_: *mut C_tensor,
        hx_: *mut C_tensor,
        cx_: *mut C_tensor,
        mode_: i64,
        hidden_size_: i64,
        proj_size_: i64,
        num_layers_: i64,
        batch_first_: c_int,
        dropout_: f64,
        train_: c_int,
        bidirectional_: c_int,
        batch_sizes_data: *const i64,
        batch_sizes_len: c_int,
        dropout_state_: *mut C_tensor,
    );
    pub fn atg__cudnn_rnn_flatten_weight(
        out__: *mut *mut C_tensor,
        weight_arr_data: *const *mut C_tensor,
        weight_arr_len: c_int,
        weight_stride0_: i64,
        input_size_: i64,
        mode_: i64,
        hidden_size_: i64,
        proj_size_: i64,
        num_layers_: i64,
        batch_first_: c_int,
        bidirectional_: c_int,
    );
    pub fn atg__cumprod(out__: *mut *mut C_tensor, self_: *mut C_tensor, dim_: i64);
    pub fn atg__cumprod_out(
        out__: *mut *mut C_tensor,
        out_: *mut C_tensor,
        self_: *mut C_tensor,
        dim_: i64,
    );
    pub fn atg__cumsum(out__: *mut *mut C_tensor, self_: *mut C_tensor, dim_: i64);
    pub fn atg__cumsum_out(
        out__: *mut *mut C_tensor,
        out_: *mut C_tensor,
        self_: *mut C_tensor,
        dim_: i64,
    );
    pub fn atg__dim_arange(out__: *mut *mut C_tensor, like_: *mut C_tensor, dim_: i64);
    pub fn atg__dirichlet_grad(
        out__: *mut *mut C_tensor,
        x_: *mut C_tensor,
        alpha_: *mut C_tensor,
        total_: *mut C_tensor,
    );
    pub fn atg__embedding_bag(
        out__: *mut *mut C_tensor,
        weight_: *mut C_tensor,
        indices_: *mut C_tensor,
        offsets_: *mut C_tensor,
        scale_grad_by_freq_: c_int,
        mode_: i64,
        sparse_: c_int,
        per_sample_weights_: *mut C_tensor,
        include_last_offset_: c_int,
    );
    pub fn atg__embedding_bag_backward(
        out__: *mut *mut C_tensor,
        grad_: *mut C_tensor,
        indices_: *mut C_tensor,
        offsets_: *mut C_tensor,
        offset2bag_: *mut C_tensor,
        bag_size_: *mut C_tensor,
        maximum_indices_: *mut C_tensor,
        num_weights_: i64,
        scale_grad_by_freq_: c_int,
        mode_: i64,
        sparse_: c_int,
        per_sample_weights_: *mut C_tensor,
    );
    pub fn atg__embedding_bag_dense_backward(
        out__: *mut *mut C_tensor,
        grad_: *mut C_tensor,
        indices_: *mut C_tensor,
        offsets_: *mut C_tensor,
        offset2bag_: *mut C_tensor,
        bag_size_: *mut C_tensor,
        maximum_indices_: *mut C_tensor,
        num_weights_: i64,
        scale_grad_by_freq_: c_int,
        mode_: i64,
        per_sample_weights_: *mut C_tensor,
    );
    pub fn atg__embedding_bag_forward_only(
        out__: *mut *mut C_tensor,
        weight_: *mut C_tensor,
        indices_: *mut C_tensor,
        offsets_: *mut C_tensor,
        scale_grad_by_freq_: c_int,
        mode_: i64,
        sparse_: c_int,
        per_sample_weights_: *mut C_tensor,
        include_last_offset_: c_int,
    );
    pub fn atg__embedding_bag_per_sample_weights_backward(
        out__: *mut *mut C_tensor,
        grad_: *mut C_tensor,
        weight_: *mut C_tensor,
        indices_: *mut C_tensor,
        offsets_: *mut C_tensor,
        offset2bag_: *mut C_tensor,
        mode_: i64,
    );
    pub fn atg__embedding_bag_sparse_backward(
        out__: *mut *mut C_tensor,
        grad_: *mut C_tensor,
        indices_: *mut C_tensor,
        offsets_: *mut C_tensor,
        offset2bag_: *mut C_tensor,
        bag_size_: *mut C_tensor,
        num_weights_: i64,
        scale_grad_by_freq_: c_int,
        mode_: i64,
        per_sample_weights_: *mut C_tensor,
    );
    pub fn atg__empty_affine_quantized(
        out__: *mut *mut C_tensor,
        size_data: *const i64,
        size_len: c_int,
        options_kind: c_int,
        options_device: c_int,
        scale_: f64,
        zero_point_: i64,
    );
    pub fn atg__empty_per_channel_affine_quantized(
        out__: *mut *mut C_tensor,
        size_data: *const i64,
        size_len: c_int,
        scales_: *mut C_tensor,
        zero_points_: *mut C_tensor,
        axis_: i64,
        options_kind: c_int,
        options_device: c_int,
    );
    pub fn atg__euclidean_dist(out__: *mut *mut C_tensor, x1_: *mut C_tensor, x2_: *mut C_tensor);
    pub fn atg__fake_quantize_learnable_per_channel_affine(
        out__: *mut *mut C_tensor,
        self_: *mut C_tensor,
        scale_: *mut C_tensor,
        zero_point_: *mut C_tensor,
        axis_: i64,
        quant_min_: i64,
        quant_max_: i64,
        grad_factor_: f64,
    );
    pub fn atg__fake_quantize_learnable_per_channel_affine_backward(
        out__: *mut *mut C_tensor,
        grad_: *mut C_tensor,
        self_: *mut C_tensor,
        scale_: *mut C_tensor,
        zero_point_: *mut C_tensor,
        axis_: i64,
        quant_min_: i64,
        quant_max_: i64,
        grad_factor_: f64,
    );
    pub fn atg__fake_quantize_learnable_per_tensor_affine(
        out__: *mut *mut C_tensor,
        self_: *mut C_tensor,
        scale_: *mut C_tensor,
        zero_point_: *mut C_tensor,
        quant_min_: i64,
        quant_max_: i64,
        grad_factor_: f64,
    );
    pub fn atg__fake_quantize_learnable_per_tensor_affine_backward(
        out__: *mut *mut C_tensor,
        grad_: *mut C_tensor,
        self_: *mut C_tensor,
        scale_: *mut C_tensor,
        zero_point_: *mut C_tensor,
        quant_min_: i64,
        quant_max_: i64,
        grad_factor_: f64,
    );
    pub fn atg__fft_c2c(
        out__: *mut *mut C_tensor,
        self_: *mut C_tensor,
        dim_data: *const i64,
        dim_len: c_int,
        normalization_: i64,
        forward_: c_int,
    );
    pub fn atg__fft_c2c_out(
        out__: *mut *mut C_tensor,
        out_: *mut C_tensor,
        self_: *mut C_tensor,
        dim_data: *const i64,
        dim_len: c_int,
        normalization_: i64,
        forward_: c_int,
    );
    pub fn atg__fft_c2r(
        out__: *mut *mut C_tensor,
        self_: *mut C_tensor,
        dim_data: *const i64,
        dim_len: c_int,
        normalization_: i64,
        last_dim_size_: i64,
    );
    pub fn atg__fft_c2r_out(
        out__: *mut *mut C_tensor,
        out_: *mut C_tensor,
        self_: *mut C_tensor,
        dim_data: *const i64,
        dim_len: c_int,
        normalization_: i64,
        last_dim_size_: i64,
    );
    pub fn atg__fft_r2c(
        out__: *mut *mut C_tensor,
        self_: *mut C_tensor,
        dim_data: *const i64,
        dim_len: c_int,
        normalization_: i64,
        onesided_: c_int,
    );
    pub fn atg__fft_r2c_out(
        out__: *mut *mut C_tensor,
        out_: *mut C_tensor,
        self_: *mut C_tensor,
        dim_data: *const i64,
        dim_len: c_int,
        normalization_: i64,
        onesided_: c_int,
    );
    pub fn atg__fused_dropout(out__: *mut *mut C_tensor, self_: *mut C_tensor, p_: f64);
    pub fn atg__fw_primal(out__: *mut *mut C_tensor, self_: *mut C_tensor, level_: i64);
    pub fn atg__gather_sparse_backward(
        out__: *mut *mut C_tensor,
        self_: *mut C_tensor,
        dim_: i64,
        index_: *mut C_tensor,
        grad_: *mut C_tensor,
    );
    pub fn atg__grid_sampler_2d_cpu_fallback(
        out__: *mut *mut C_tensor,
        input_: *mut C_tensor,
        grid_: *mut C_tensor,
        interpolation_mode_: i64,
        padding_mode_: i64,
        align_corners_: c_int,
    );
    pub fn atg__grid_sampler_2d_cpu_fallback_backward(
        out__: *mut *mut C_tensor,
        grad_output_: *mut C_tensor,
        input_: *mut C_tensor,
        grid_: *mut C_tensor,
        interpolation_mode_: i64,
        padding_mode_: i64,
        align_corners_: c_int,
    );
    pub fn atg__index_copy_(
        out__: *mut *mut C_tensor,
        self_: *mut C_tensor,
        dim_: i64,
        index_: *mut C_tensor,
        source_: *mut C_tensor,
    );
    pub fn atg__index_put_impl_(
        out__: *mut *mut C_tensor,
        self_: *mut C_tensor,
        indices_data: *const *mut C_tensor,
        indices_len: c_int,
        values_: *mut C_tensor,
        accumulate_: c_int,
        unsafe_: c_int,
    );
    pub fn atg__indices(out__: *mut *mut C_tensor, self_: *mut C_tensor);
    pub fn atg__inverse_helper(out__: *mut *mut C_tensor, self_: *mut C_tensor);
    pub fn atg__linalg_inv_out_helper_(
        out__: *mut *mut C_tensor,
        self_: *mut C_tensor,
        infos_lu_: *mut C_tensor,
        infos_getri_: *mut C_tensor,
    );
    pub fn atg__linalg_qr_helper(
        out__: *mut *mut C_tensor,
        self_: *mut C_tensor,
        mode_ptr: *const u8,
        mode_len: c_int,
    );
    pub fn atg__linalg_solve_out_helper_(
        out__: *mut *mut C_tensor,
        self_: *mut C_tensor,
        other_: *mut C_tensor,
        infos_: *mut C_tensor,
    );
    pub fn atg__log_softmax(
        out__: *mut *mut C_tensor,
        self_: *mut C_tensor,
        dim_: i64,
        half_to_float_: c_int,
    );
    pub fn atg__log_softmax_backward_data(
        out__: *mut *mut C_tensor,
        grad_output_: *mut C_tensor,
        output_: *mut C_tensor,
        dim_: i64,
        self_: *mut C_tensor,
    );
    pub fn atg__logcumsumexp(out__: *mut *mut C_tensor, self_: *mut C_tensor, dim_: i64);
    pub fn atg__logcumsumexp_out(
        out__: *mut *mut C_tensor,
        out_: *mut C_tensor,
        self_: *mut C_tensor,
        dim_: i64,
    );
    pub fn atg__lu_solve_helper(
        out__: *mut *mut C_tensor,
        self_: *mut C_tensor,
        LU_data_: *mut C_tensor,
        LU_pivots_: *mut C_tensor,
    );
    pub fn atg__lu_with_info(
        out__: *mut *mut C_tensor,
        self_: *mut C_tensor,
        pivot_: c_int,
        check_errors_: c_int,
    );
    pub fn atg__make_dual(
        out__: *mut *mut C_tensor,
        primal_: *mut C_tensor,
        tangent_: *mut C_tensor,
        level_: i64,
    );
    pub fn atg__make_per_channel_quantized_tensor(
        out__: *mut *mut C_tensor,
        self_: *mut C_tensor,
        scale_: *mut C_tensor,
        zero_point_: *mut C_tensor,
        axis_: i64,
    );
    pub fn atg__make_per_tensor_quantized_tensor(
        out__: *mut *mut C_tensor,
        self_: *mut C_tensor,
        scale_: f64,
        zero_point_: i64,
    );
    pub fn atg__masked_scale(
        out__: *mut *mut C_tensor,
        self_: *mut C_tensor,
        mask_: *mut C_tensor,
        scale_: f64,
    );
    pub fn atg__mkldnn_reshape(
        out__: *mut *mut C_tensor,
        self_: *mut C_tensor,
        shape_data: *const i64,
        shape_len: c_int,
    );
    pub fn atg__mkldnn_transpose(
        out__: *mut *mut C_tensor,
        self_: *mut C_tensor,
        dim0_: i64,
        dim1_: i64,
    );
    pub fn atg__mkldnn_transpose_(
        out__: *mut *mut C_tensor,
        self_: *mut C_tensor,
        dim0_: i64,
        dim1_: i64,
    );
    pub fn atg__mode(out__: *mut *mut C_tensor, self_: *mut C_tensor, dim_: i64, keepdim_: c_int);
    pub fn atg__mode_out(
        out__: *mut *mut C_tensor,
        values_: *mut C_tensor,
        indices_: *mut C_tensor,
        self_: *mut C_tensor,
        dim_: i64,
        keepdim_: c_int,
    );
    pub fn atg__nnpack_spatial_convolution(
        out__: *mut *mut C_tensor,
        input_: *mut C_tensor,
        weight_: *mut C_tensor,
        bias_: *mut C_tensor,
        padding_data: *const i64,
        padding_len: c_int,
        stride_data: *const i64,
        stride_len: c_int,
    );
    pub fn atg__nnpack_spatial_convolution_backward_input(
        out__: *mut *mut C_tensor,
        input_: *mut C_tensor,
        grad_output_: *mut C_tensor,
        weight_: *mut C_tensor,
        padding_data: *const i64,
        padding_len: c_int,
    );
    pub fn atg__nnpack_spatial_convolution_backward_weight(
        out__: *mut *mut C_tensor,
        input_: *mut C_tensor,
        weightsize_data: *const i64,
        weightsize_len: c_int,
        grad_output_: *mut C_tensor,
        padding_data: *const i64,
        padding_len: c_int,
    );
    pub fn atg__pack_padded_sequence(
        out__: *mut *mut C_tensor,
        input_: *mut C_tensor,
        lengths_: *mut C_tensor,
        batch_first_: c_int,
    );
    pub fn atg__pack_padded_sequence_backward(
        out__: *mut *mut C_tensor,
        grad_: *mut C_tensor,
        input_size_data: *const i64,
        input_size_len: c_int,
        batch_sizes_: *mut C_tensor,
        batch_first_: c_int,
    );
    pub fn atg__pad_packed_sequence(
        out__: *mut *mut C_tensor,
        data_: *mut C_tensor,
        batch_sizes_: *mut C_tensor,
        batch_first_: c_int,
        padding_value_: *mut C_scalar,
        total_length_: i64,
    );
    pub fn atg__pdist_backward(
        out__: *mut *mut C_tensor,
        grad_: *mut C_tensor,
        self_: *mut C_tensor,
        p_: f64,
        pdist_: *mut C_tensor,
    );
    pub fn atg__remove_batch_dim(
        out__: *mut *mut C_tensor,
        self_: *mut C_tensor,
        level_: i64,
        batch_size_: i64,
        out_dim_: i64,
    );
    pub fn atg__reshape_from_tensor(
        out__: *mut *mut C_tensor,
        self_: *mut C_tensor,
        shape_: *mut C_tensor,
    );
    pub fn atg__rowwise_prune(
        out__: *mut *mut C_tensor,
        weight_: *mut C_tensor,
        mask_: *mut C_tensor,
        compressed_indices_dtype_: c_int,
    );
    pub fn atg__s_where(
        out__: *mut *mut C_tensor,
        condition_: *mut C_tensor,
        self_: *mut C_tensor,
        other_: *mut C_tensor,
    );
    pub fn atg__sample_dirichlet(out__: *mut *mut C_tensor, self_: *mut C_tensor);
    pub fn atg__saturate_weight_to_fp16(out__: *mut *mut C_tensor, weight_: *mut C_tensor);
    pub fn atg__shape_as_tensor(out__: *mut *mut C_tensor, self_: *mut C_tensor);
    pub fn atg__sobol_engine_draw(
        out__: *mut *mut C_tensor,
        quasi_: *mut C_tensor,
        n_: i64,
        sobolstate_: *mut C_tensor,
        dimension_: i64,
        num_generated_: i64,
        dtype_: c_int,
    );
    pub fn atg__sobol_engine_ff_(
        out__: *mut *mut C_tensor,
        self_: *mut C_tensor,
        n_: i64,
        sobolstate_: *mut C_tensor,
        dimension_: i64,
        num_generated_: i64,
    );
    pub fn atg__sobol_engine_initialize_state_(
        out__: *mut *mut C_tensor,
        self_: *mut C_tensor,
        dimension_: i64,
    );
    pub fn atg__sobol_engine_scramble_(
        out__: *mut *mut C_tensor,
        self_: *mut C_tensor,
        ltm_: *mut C_tensor,
        dimension_: i64,
    );
    pub fn atg__softmax(
        out__: *mut *mut C_tensor,
        self_: *mut C_tensor,
        dim_: i64,
        half_to_float_: c_int,
    );
    pub fn atg__softmax_backward_data(
        out__: *mut *mut C_tensor,
        grad_output_: *mut C_tensor,
        output_: *mut C_tensor,
        dim_: i64,
        self_: *mut C_tensor,
    );
    pub fn atg__solve_helper(out__: *mut *mut C_tensor, self_: *mut C_tensor, A_: *mut C_tensor);
    pub fn atg__sparse_addmm(
        out__: *mut *mut C_tensor,
        self_: *mut C_tensor,
        sparse_: *mut C_tensor,
        dense_: *mut C_tensor,
    );
    pub fn atg__sparse_coo_tensor_unsafe(
        out__: *mut *mut C_tensor,
        indices_: *mut C_tensor,
        values_: *mut C_tensor,
        size_data: *const i64,
        size_len: c_int,
        options_kind: c_int,
        options_device: c_int,
    );
    pub fn atg__sparse_coo_tensor_with_dims(
        out__: *mut *mut C_tensor,
        sparse_dim_: i64,
        dense_dim_: i64,
        size_data: *const i64,
        size_len: c_int,
        options_kind: c_int,
        options_device: c_int,
    );
    pub fn atg__sparse_coo_tensor_with_dims_and_tensors(
        out__: *mut *mut C_tensor,
        sparse_dim_: i64,
        dense_dim_: i64,
        size_data: *const i64,
        size_len: c_int,
        indices_: *mut C_tensor,
        values_: *mut C_tensor,
        options_kind: c_int,
        options_device: c_int,
    );
    pub fn atg__sparse_log_softmax(
        out__: *mut *mut C_tensor,
        self_: *mut C_tensor,
        dim_: i64,
        dtype_: c_int,
    );
    pub fn atg__sparse_log_softmax1(
        out__: *mut *mut C_tensor,
        self_: *mut C_tensor,
        dim_: i64,
        half_to_float_: c_int,
    );
    pub fn atg__sparse_log_softmax_backward_data(
        out__: *mut *mut C_tensor,
        grad_output_: *mut C_tensor,
        output_: *mut C_tensor,
        dim_: i64,
        self_: *mut C_tensor,
    );
    pub fn atg__sparse_matrix_mask_helper(
        out__: *mut *mut C_tensor,
        t_: *mut C_tensor,
        mask_indices_: *mut C_tensor,
    );
    pub fn atg__sparse_mm(out__: *mut *mut C_tensor, sparse_: *mut C_tensor, dense_: *mut C_tensor);
    pub fn atg__sparse_softmax(
        out__: *mut *mut C_tensor,
        self_: *mut C_tensor,
        dim_: i64,
        dtype_: c_int,
    );
    pub fn atg__sparse_softmax1(
        out__: *mut *mut C_tensor,
        self_: *mut C_tensor,
        dim_: i64,
        half_to_float_: c_int,
    );
    pub fn atg__sparse_softmax_backward_data(
        out__: *mut *mut C_tensor,
        grad_output_: *mut C_tensor,
        output_: *mut C_tensor,
        dim_: i64,
        self_: *mut C_tensor,
    );
    pub fn atg__sparse_sparse_matmul(
        out__: *mut *mut C_tensor,
        self_: *mut C_tensor,
        other_: *mut C_tensor,
    );
    pub fn atg__sparse_sum(out__: *mut *mut C_tensor, self_: *mut C_tensor);
    pub fn atg__sparse_sum1(out__: *mut *mut C_tensor, self_: *mut C_tensor, dtype_: c_int);
    pub fn atg__sparse_sum2(
        out__: *mut *mut C_tensor,
        self_: *mut C_tensor,
        dim_data: *const i64,
        dim_len: c_int,
    );
    pub fn atg__sparse_sum3(
        out__: *mut *mut C_tensor,
        self_: *mut C_tensor,
        dim_data: *const i64,
        dim_len: c_int,
        dtype_: c_int,
    );
    pub fn atg__sparse_sum_backward(
        out__: *mut *mut C_tensor,
        grad_: *mut C_tensor,
        self_: *mut C_tensor,
        dim_data: *const i64,
        dim_len: c_int,
    );
    pub fn atg__stack(
        out__: *mut *mut C_tensor,
        tensors_data: *const *mut C_tensor,
        tensors_len: c_int,
        dim_: i64,
    );
    pub fn atg__stack_out(
        out__: *mut *mut C_tensor,
        out_: *mut C_tensor,
        tensors_data: *const *mut C_tensor,
        tensors_len: c_int,
        dim_: i64,
    );
    pub fn atg__standard_gamma(out__: *mut *mut C_tensor, self_: *mut C_tensor);
    pub fn atg__standard_gamma_grad(
        out__: *mut *mut C_tensor,
        self_: *mut C_tensor,
        output_: *mut C_tensor,
    );
    pub fn atg__std(out__: *mut *mut C_tensor, self_: *mut C_tensor, unbiased_: c_int);
    pub fn atg__svd_helper(
        out__: *mut *mut C_tensor,
        self_: *mut C_tensor,
        some_: c_int,
        compute_uv_: c_int,
    );
    pub fn atg__syevd_helper(
        out__: *mut *mut C_tensor,
        self_: *mut C_tensor,
        compute_eigenvectors_: c_int,
        uplo_ptr: *const u8,
        uplo_len: c_int,
    );
    pub fn atg__symeig_helper(
        out__: *mut *mut C_tensor,
        self_: *mut C_tensor,
        eigenvectors_: c_int,
        upper_: c_int,
    );
    pub fn atg__test_ambiguous_defaults(
        out__: *mut *mut C_tensor,
        dummy_: *mut C_tensor,
        a_: i64,
        b_: i64,
    );
    pub fn atg__test_ambiguous_defaults1(
        out__: *mut *mut C_tensor,
        dummy_: *mut C_tensor,
        a_: i64,
        b_ptr: *const u8,
        b_len: c_int,
    );
    pub fn atg__test_optional_filled_intlist(
        out__: *mut *mut C_tensor,
        values_: *mut C_tensor,
        addends_data: *const i64,
        addends_len: c_int,
    );
    pub fn atg__test_optional_intlist(
        out__: *mut *mut C_tensor,
        values_: *mut C_tensor,
        addends_data: *const i64,
        addends_len: c_int,
    );
    pub fn atg__test_serialization_subcmul(
        out__: *mut *mut C_tensor,
        self_: *mut C_tensor,
        other_: *mut C_tensor,
    );
    pub fn atg__test_string_default(
        out__: *mut *mut C_tensor,
        dummy_: *mut C_tensor,
        a_ptr: *const u8,
        a_len: c_int,
        b_ptr: *const u8,
        b_len: c_int,
    );
    pub fn atg__triangular_solve_helper(
        out__: *mut *mut C_tensor,
        self_: *mut C_tensor,
        A_: *mut C_tensor,
        upper_: c_int,
        transpose_: c_int,
        unitriangular_: c_int,
    );
    pub fn atg__trilinear(
        out__: *mut *mut C_tensor,
        i1_: *mut C_tensor,
        i2_: *mut C_tensor,
        i3_: *mut C_tensor,
        expand1_data: *const i64,
        expand1_len: c_int,
        expand2_data: *const i64,
        expand2_len: c_int,
        expand3_data: *const i64,
        expand3_len: c_int,
        sumdim_data: *const i64,
        sumdim_len: c_int,
        unroll_dim_: i64,
    );
    pub fn atg__unique(
        out__: *mut *mut C_tensor,
        self_: *mut C_tensor,
        sorted_: c_int,
        return_inverse_: c_int,
    );
    pub fn atg__unique2(
        out__: *mut *mut C_tensor,
        self_: *mut C_tensor,
        sorted_: c_int,
        return_inverse_: c_int,
        return_counts_: c_int,
    );
    pub fn atg__unpack_dual(out__: *mut *mut C_tensor, dual_: *mut C_tensor, level_: i64);
    pub fn atg__unsafe_view(
        out__: *mut *mut C_tensor,
        self_: *mut C_tensor,
        size_data: *const i64,
        size_len: c_int,
    );
    pub fn atg__values(out__: *mut *mut C_tensor, self_: *mut C_tensor);
    pub fn atg__var(out__: *mut *mut C_tensor, self_: *mut C_tensor, unbiased_: c_int);
    pub fn atg__weight_norm(
        out__: *mut *mut C_tensor,
        v_: *mut C_tensor,
        g_: *mut C_tensor,
        dim_: i64,
    );
    pub fn atg__weight_norm_cuda_interface(
        out__: *mut *mut C_tensor,
        v_: *mut C_tensor,
        g_: *mut C_tensor,
        dim_: i64,
    );
    pub fn atg__weight_norm_cuda_interface_backward(
        out__: *mut *mut C_tensor,
        grad_w_: *mut C_tensor,
        saved_v_: *mut C_tensor,
        saved_g_: *mut C_tensor,
        saved_norms_: *mut C_tensor,
        dim_: i64,
    );
    pub fn atg__weight_norm_differentiable_backward(
        out__: *mut *mut C_tensor,
        grad_w_: *mut C_tensor,
        saved_v_: *mut C_tensor,
        saved_g_: *mut C_tensor,
        saved_norms_: *mut C_tensor,
        dim_: i64,
    );
    pub fn atg_abs(out__: *mut *mut C_tensor, self_: *mut C_tensor);
    pub fn atg_abs_(out__: *mut *mut C_tensor, self_: *mut C_tensor);
    pub fn atg_abs_out(out__: *mut *mut C_tensor, out_: *mut C_tensor, self_: *mut C_tensor);
    pub fn atg_absolute(out__: *mut *mut C_tensor, self_: *mut C_tensor);
    pub fn atg_absolute_(out__: *mut *mut C_tensor, self_: *mut C_tensor);
    pub fn atg_absolute_out(out__: *mut *mut C_tensor, out_: *mut C_tensor, self_: *mut C_tensor);
    pub fn atg_acos(out__: *mut *mut C_tensor, self_: *mut C_tensor);
    pub fn atg_acos_(out__: *mut *mut C_tensor, self_: *mut C_tensor);
    pub fn atg_acos_out(out__: *mut *mut C_tensor, out_: *mut C_tensor, self_: *mut C_tensor);
    pub fn atg_acosh(out__: *mut *mut C_tensor, self_: *mut C_tensor);
    pub fn atg_acosh_(out__: *mut *mut C_tensor, self_: *mut C_tensor);
    pub fn atg_acosh_out(out__: *mut *mut C_tensor, out_: *mut C_tensor, self_: *mut C_tensor);
    pub fn atg_adaptive_avg_pool1d(
        out__: *mut *mut C_tensor,
        self_: *mut C_tensor,
        output_size_data: *const i64,
        output_size_len: c_int,
    );
    pub fn atg_adaptive_avg_pool2d(
        out__: *mut *mut C_tensor,
        self_: *mut C_tensor,
        output_size_data: *const i64,
        output_size_len: c_int,
    );
    pub fn atg_adaptive_avg_pool2d_out(
        out__: *mut *mut C_tensor,
        out_: *mut C_tensor,
        self_: *mut C_tensor,
        output_size_data: *const i64,
        output_size_len: c_int,
    );
    pub fn atg_adaptive_avg_pool3d(
        out__: *mut *mut C_tensor,
        self_: *mut C_tensor,
        output_size_data: *const i64,
        output_size_len: c_int,
    );
    pub fn atg_adaptive_avg_pool3d_backward(
        out__: *mut *mut C_tensor,
        grad_output_: *mut C_tensor,
        self_: *mut C_tensor,
    );
    pub fn atg_adaptive_avg_pool3d_backward_out(
        out__: *mut *mut C_tensor,
        grad_input_: *mut C_tensor,
        grad_output_: *mut C_tensor,
        self_: *mut C_tensor,
    );
    pub fn atg_adaptive_avg_pool3d_out(
        out__: *mut *mut C_tensor,
        out_: *mut C_tensor,
        self_: *mut C_tensor,
        output_size_data: *const i64,
        output_size_len: c_int,
    );
    pub fn atg_adaptive_max_pool1d(
        out__: *mut *mut C_tensor,
        self_: *mut C_tensor,
        output_size_data: *const i64,
        output_size_len: c_int,
    );
    pub fn atg_adaptive_max_pool2d(
        out__: *mut *mut C_tensor,
        self_: *mut C_tensor,
        output_size_data: *const i64,
        output_size_len: c_int,
    );
    pub fn atg_adaptive_max_pool2d_backward(
        out__: *mut *mut C_tensor,
        grad_output_: *mut C_tensor,
        self_: *mut C_tensor,
        indices_: *mut C_tensor,
    );
    pub fn atg_adaptive_max_pool2d_backward_out(
        out__: *mut *mut C_tensor,
        grad_input_: *mut C_tensor,
        grad_output_: *mut C_tensor,
        self_: *mut C_tensor,
        indices_: *mut C_tensor,
    );
    pub fn atg_adaptive_max_pool2d_out(
        out__: *mut *mut C_tensor,
        out_: *mut C_tensor,
        indices_: *mut C_tensor,
        self_: *mut C_tensor,
        output_size_data: *const i64,
        output_size_len: c_int,
    );
    pub fn atg_adaptive_max_pool3d(
        out__: *mut *mut C_tensor,
        self_: *mut C_tensor,
        output_size_data: *const i64,
        output_size_len: c_int,
    );
    pub fn atg_adaptive_max_pool3d_backward(
        out__: *mut *mut C_tensor,
        grad_output_: *mut C_tensor,
        self_: *mut C_tensor,
        indices_: *mut C_tensor,
    );
    pub fn atg_adaptive_max_pool3d_backward_out(
        out__: *mut *mut C_tensor,
        grad_input_: *mut C_tensor,
        grad_output_: *mut C_tensor,
        self_: *mut C_tensor,
        indices_: *mut C_tensor,
    );
    pub fn atg_adaptive_max_pool3d_out(
        out__: *mut *mut C_tensor,
        out_: *mut C_tensor,
        indices_: *mut C_tensor,
        self_: *mut C_tensor,
        output_size_data: *const i64,
        output_size_len: c_int,
    );
    pub fn atg_add(out__: *mut *mut C_tensor, self_: *mut C_tensor, other_: *mut C_tensor);
    pub fn atg_add1(out__: *mut *mut C_tensor, self_: *mut C_tensor, other_: *mut C_scalar);
    pub fn atg_add_(out__: *mut *mut C_tensor, self_: *mut C_tensor, other_: *mut C_tensor);
    pub fn atg_add_1(out__: *mut *mut C_tensor, self_: *mut C_tensor, other_: *mut C_scalar);
    pub fn atg_add_out(
        out__: *mut *mut C_tensor,
        out_: *mut C_tensor,
        self_: *mut C_tensor,
        other_: *mut C_tensor,
    );
    pub fn atg_addbmm(
        out__: *mut *mut C_tensor,
        self_: *mut C_tensor,
        batch1_: *mut C_tensor,
        batch2_: *mut C_tensor,
    );
    pub fn atg_addbmm_(
        out__: *mut *mut C_tensor,
        self_: *mut C_tensor,
        batch1_: *mut C_tensor,
        batch2_: *mut C_tensor,
    );
    pub fn atg_addbmm_out(
        out__: *mut *mut C_tensor,
        out_: *mut C_tensor,
        self_: *mut C_tensor,
        batch1_: *mut C_tensor,
        batch2_: *mut C_tensor,
    );
    pub fn atg_addcdiv(
        out__: *mut *mut C_tensor,
        self_: *mut C_tensor,
        tensor1_: *mut C_tensor,
        tensor2_: *mut C_tensor,
    );
    pub fn atg_addcdiv_(
        out__: *mut *mut C_tensor,
        self_: *mut C_tensor,
        tensor1_: *mut C_tensor,
        tensor2_: *mut C_tensor,
    );
    pub fn atg_addcdiv_out(
        out__: *mut *mut C_tensor,
        out_: *mut C_tensor,
        self_: *mut C_tensor,
        tensor1_: *mut C_tensor,
        tensor2_: *mut C_tensor,
    );
    pub fn atg_addcmul(
        out__: *mut *mut C_tensor,
        self_: *mut C_tensor,
        tensor1_: *mut C_tensor,
        tensor2_: *mut C_tensor,
    );
    pub fn atg_addcmul_(
        out__: *mut *mut C_tensor,
        self_: *mut C_tensor,
        tensor1_: *mut C_tensor,
        tensor2_: *mut C_tensor,
    );
    pub fn atg_addcmul_out(
        out__: *mut *mut C_tensor,
        out_: *mut C_tensor,
        self_: *mut C_tensor,
        tensor1_: *mut C_tensor,
        tensor2_: *mut C_tensor,
    );
    pub fn atg_addmm(
        out__: *mut *mut C_tensor,
        self_: *mut C_tensor,
        mat1_: *mut C_tensor,
        mat2_: *mut C_tensor,
    );
    pub fn atg_addmm_(
        out__: *mut *mut C_tensor,
        self_: *mut C_tensor,
        mat1_: *mut C_tensor,
        mat2_: *mut C_tensor,
    );
    pub fn atg_addmm_out(
        out__: *mut *mut C_tensor,
        out_: *mut C_tensor,
        self_: *mut C_tensor,
        mat1_: *mut C_tensor,
        mat2_: *mut C_tensor,
    );
    pub fn atg_addmv(
        out__: *mut *mut C_tensor,
        self_: *mut C_tensor,
        mat_: *mut C_tensor,
        vec_: *mut C_tensor,
    );
    pub fn atg_addmv_(
        out__: *mut *mut C_tensor,
        self_: *mut C_tensor,
        mat_: *mut C_tensor,
        vec_: *mut C_tensor,
    );
    pub fn atg_addmv_out(
        out__: *mut *mut C_tensor,
        out_: *mut C_tensor,
        self_: *mut C_tensor,
        mat_: *mut C_tensor,
        vec_: *mut C_tensor,
    );
    pub fn atg_addr(
        out__: *mut *mut C_tensor,
        self_: *mut C_tensor,
        vec1_: *mut C_tensor,
        vec2_: *mut C_tensor,
    );
    pub fn atg_addr_(
        out__: *mut *mut C_tensor,
        self_: *mut C_tensor,
        vec1_: *mut C_tensor,
        vec2_: *mut C_tensor,
    );
    pub fn atg_addr_out(
        out__: *mut *mut C_tensor,
        out_: *mut C_tensor,
        self_: *mut C_tensor,
        vec1_: *mut C_tensor,
        vec2_: *mut C_tensor,
    );
    pub fn atg_affine_grid_generator(
        out__: *mut *mut C_tensor,
        theta_: *mut C_tensor,
        size_data: *const i64,
        size_len: c_int,
        align_corners_: c_int,
    );
    pub fn atg_affine_grid_generator_backward(
        out__: *mut *mut C_tensor,
        grad_: *mut C_tensor,
        size_data: *const i64,
        size_len: c_int,
        align_corners_: c_int,
    );
    pub fn atg_alias(out__: *mut *mut C_tensor, self_: *mut C_tensor);
    pub fn atg_align_as(out__: *mut *mut C_tensor, self_: *mut C_tensor, other_: *mut C_tensor);
    pub fn atg_align_tensors(
        tensors_data: *const *mut C_tensor,
        tensors_len: c_int,
    ) -> *mut *mut C_tensor;
    pub fn atg_all(out__: *mut *mut C_tensor, self_: *mut C_tensor);
    pub fn atg_all1(out__: *mut *mut C_tensor, self_: *mut C_tensor, dim_: i64, keepdim_: c_int);
    pub fn atg_all_out(
        out__: *mut *mut C_tensor,
        out_: *mut C_tensor,
        self_: *mut C_tensor,
        dim_: i64,
        keepdim_: c_int,
    );
    pub fn atg_alpha_dropout(
        out__: *mut *mut C_tensor,
        input_: *mut C_tensor,
        p_: f64,
        train_: c_int,
    );
    pub fn atg_alpha_dropout_(
        out__: *mut *mut C_tensor,
        self_: *mut C_tensor,
        p_: f64,
        train_: c_int,
    );
    pub fn atg_amax(
        out__: *mut *mut C_tensor,
        self_: *mut C_tensor,
        dim_data: *const i64,
        dim_len: c_int,
        keepdim_: c_int,
    );
    pub fn atg_amax_out(
        out__: *mut *mut C_tensor,
        out_: *mut C_tensor,
        self_: *mut C_tensor,
        dim_data: *const i64,
        dim_len: c_int,
        keepdim_: c_int,
    );
    pub fn atg_amin(
        out__: *mut *mut C_tensor,
        self_: *mut C_tensor,
        dim_data: *const i64,
        dim_len: c_int,
        keepdim_: c_int,
    );
    pub fn atg_amin_out(
        out__: *mut *mut C_tensor,
        out_: *mut C_tensor,
        self_: *mut C_tensor,
        dim_data: *const i64,
        dim_len: c_int,
        keepdim_: c_int,
    );
    pub fn atg_angle(out__: *mut *mut C_tensor, self_: *mut C_tensor);
    pub fn atg_angle_out(out__: *mut *mut C_tensor, out_: *mut C_tensor, self_: *mut C_tensor);
    pub fn atg_any(out__: *mut *mut C_tensor, self_: *mut C_tensor);
    pub fn atg_any1(out__: *mut *mut C_tensor, self_: *mut C_tensor, dim_: i64, keepdim_: c_int);
    pub fn atg_any_out(
        out__: *mut *mut C_tensor,
        out_: *mut C_tensor,
        self_: *mut C_tensor,
        dim_: i64,
        keepdim_: c_int,
    );
    pub fn atg_arange(
        out__: *mut *mut C_tensor,
        end_: *mut C_scalar,
        options_kind: c_int,
        options_device: c_int,
    );
    pub fn atg_arange1(
        out__: *mut *mut C_tensor,
        start_: *mut C_scalar,
        end_: *mut C_scalar,
        options_kind: c_int,
        options_device: c_int,
    );
    pub fn atg_arange2(
        out__: *mut *mut C_tensor,
        start_: *mut C_scalar,
        end_: *mut C_scalar,
        step_: *mut C_scalar,
        options_kind: c_int,
        options_device: c_int,
    );
    pub fn atg_arange_out(out__: *mut *mut C_tensor, out_: *mut C_tensor, end_: *mut C_scalar);
    pub fn atg_arange_out1(
        out__: *mut *mut C_tensor,
        out_: *mut C_tensor,
        start_: *mut C_scalar,
        end_: *mut C_scalar,
    );
    pub fn atg_arccos(out__: *mut *mut C_tensor, self_: *mut C_tensor);
    pub fn atg_arccos_(out__: *mut *mut C_tensor, self_: *mut C_tensor);
    pub fn atg_arccos_out(out__: *mut *mut C_tensor, out_: *mut C_tensor, self_: *mut C_tensor);
    pub fn atg_arccosh(out__: *mut *mut C_tensor, self_: *mut C_tensor);
    pub fn atg_arccosh_(out__: *mut *mut C_tensor, self_: *mut C_tensor);
    pub fn atg_arccosh_out(out__: *mut *mut C_tensor, out_: *mut C_tensor, self_: *mut C_tensor);
    pub fn atg_arcsin(out__: *mut *mut C_tensor, self_: *mut C_tensor);
    pub fn atg_arcsin_(out__: *mut *mut C_tensor, self_: *mut C_tensor);
    pub fn atg_arcsin_out(out__: *mut *mut C_tensor, out_: *mut C_tensor, self_: *mut C_tensor);
    pub fn atg_arcsinh(out__: *mut *mut C_tensor, self_: *mut C_tensor);
    pub fn atg_arcsinh_(out__: *mut *mut C_tensor, self_: *mut C_tensor);
    pub fn atg_arcsinh_out(out__: *mut *mut C_tensor, out_: *mut C_tensor, self_: *mut C_tensor);
    pub fn atg_arctan(out__: *mut *mut C_tensor, self_: *mut C_tensor);
    pub fn atg_arctan_(out__: *mut *mut C_tensor, self_: *mut C_tensor);
    pub fn atg_arctan_out(out__: *mut *mut C_tensor, out_: *mut C_tensor, self_: *mut C_tensor);
    pub fn atg_arctanh(out__: *mut *mut C_tensor, self_: *mut C_tensor);
    pub fn atg_arctanh_(out__: *mut *mut C_tensor, self_: *mut C_tensor);
    pub fn atg_arctanh_out(out__: *mut *mut C_tensor, out_: *mut C_tensor, self_: *mut C_tensor);
    pub fn atg_argmax(
        out__: *mut *mut C_tensor,
        self_: *mut C_tensor,
        dim_v: i64,
        dim_null: i8,
        keepdim_: c_int,
    );
    pub fn atg_argmax_out(
        out__: *mut *mut C_tensor,
        out_: *mut C_tensor,
        self_: *mut C_tensor,
        dim_v: i64,
        dim_null: i8,
        keepdim_: c_int,
    );
    pub fn atg_argmin(
        out__: *mut *mut C_tensor,
        self_: *mut C_tensor,
        dim_v: i64,
        dim_null: i8,
        keepdim_: c_int,
    );
    pub fn atg_argmin_out(
        out__: *mut *mut C_tensor,
        out_: *mut C_tensor,
        self_: *mut C_tensor,
        dim_v: i64,
        dim_null: i8,
        keepdim_: c_int,
    );
    pub fn atg_argsort(
        out__: *mut *mut C_tensor,
        self_: *mut C_tensor,
        dim_: i64,
        descending_: c_int,
    );
    pub fn atg_as_strided(
        out__: *mut *mut C_tensor,
        self_: *mut C_tensor,
        size_data: *const i64,
        size_len: c_int,
        stride_data: *const i64,
        stride_len: c_int,
        storage_offset_v: i64,
        storage_offset_null: i8,
    );
    pub fn atg_as_strided_(
        out__: *mut *mut C_tensor,
        self_: *mut C_tensor,
        size_data: *const i64,
        size_len: c_int,
        stride_data: *const i64,
        stride_len: c_int,
        storage_offset_v: i64,
        storage_offset_null: i8,
    );
    pub fn atg_asin(out__: *mut *mut C_tensor, self_: *mut C_tensor);
    pub fn atg_asin_(out__: *mut *mut C_tensor, self_: *mut C_tensor);
    pub fn atg_asin_out(out__: *mut *mut C_tensor, out_: *mut C_tensor, self_: *mut C_tensor);
    pub fn atg_asinh(out__: *mut *mut C_tensor, self_: *mut C_tensor);
    pub fn atg_asinh_(out__: *mut *mut C_tensor, self_: *mut C_tensor);
    pub fn atg_asinh_out(out__: *mut *mut C_tensor, out_: *mut C_tensor, self_: *mut C_tensor);
    pub fn atg_atan(out__: *mut *mut C_tensor, self_: *mut C_tensor);
    pub fn atg_atan2(out__: *mut *mut C_tensor, self_: *mut C_tensor, other_: *mut C_tensor);
    pub fn atg_atan2_(out__: *mut *mut C_tensor, self_: *mut C_tensor, other_: *mut C_tensor);
    pub fn atg_atan2_out(
        out__: *mut *mut C_tensor,
        out_: *mut C_tensor,
        self_: *mut C_tensor,
        other_: *mut C_tensor,
    );
    pub fn atg_atan_(out__: *mut *mut C_tensor, self_: *mut C_tensor);
    pub fn atg_atan_out(out__: *mut *mut C_tensor, out_: *mut C_tensor, self_: *mut C_tensor);
    pub fn atg_atanh(out__: *mut *mut C_tensor, self_: *mut C_tensor);
    pub fn atg_atanh_(out__: *mut *mut C_tensor, self_: *mut C_tensor);
    pub fn atg_atanh_out(out__: *mut *mut C_tensor, out_: *mut C_tensor, self_: *mut C_tensor);
    pub fn atg_atleast_1d(out__: *mut *mut C_tensor, self_: *mut C_tensor);
    pub fn atg_atleast_1d1(
        tensors_data: *const *mut C_tensor,
        tensors_len: c_int,
    ) -> *mut *mut C_tensor;
    pub fn atg_atleast_2d(out__: *mut *mut C_tensor, self_: *mut C_tensor);
    pub fn atg_atleast_2d1(
        tensors_data: *const *mut C_tensor,
        tensors_len: c_int,
    ) -> *mut *mut C_tensor;
    pub fn atg_atleast_3d(out__: *mut *mut C_tensor, self_: *mut C_tensor);
    pub fn atg_atleast_3d1(
        tensors_data: *const *mut C_tensor,
        tensors_len: c_int,
    ) -> *mut *mut C_tensor;
    pub fn atg_avg_pool1d(
        out__: *mut *mut C_tensor,
        self_: *mut C_tensor,
        kernel_size_data: *const i64,
        kernel_size_len: c_int,
        stride_data: *const i64,
        stride_len: c_int,
        padding_data: *const i64,
        padding_len: c_int,
        ceil_mode_: c_int,
        count_include_pad_: c_int,
    );
    pub fn atg_avg_pool2d(
        out__: *mut *mut C_tensor,
        self_: *mut C_tensor,
        kernel_size_data: *const i64,
        kernel_size_len: c_int,
        stride_data: *const i64,
        stride_len: c_int,
        padding_data: *const i64,
        padding_len: c_int,
        ceil_mode_: c_int,
        count_include_pad_: c_int,
        divisor_override_v: i64,
        divisor_override_null: i8,
    );
    pub fn atg_avg_pool2d_backward(
        out__: *mut *mut C_tensor,
        grad_output_: *mut C_tensor,
        self_: *mut C_tensor,
        kernel_size_data: *const i64,
        kernel_size_len: c_int,
        stride_data: *const i64,
        stride_len: c_int,
        padding_data: *const i64,
        padding_len: c_int,
        ceil_mode_: c_int,
        count_include_pad_: c_int,
        divisor_override_v: i64,
        divisor_override_null: i8,
    );
    pub fn atg_avg_pool2d_backward_out(
        out__: *mut *mut C_tensor,
        grad_input_: *mut C_tensor,
        grad_output_: *mut C_tensor,
        self_: *mut C_tensor,
        kernel_size_data: *const i64,
        kernel_size_len: c_int,
        stride_data: *const i64,
        stride_len: c_int,
        padding_data: *const i64,
        padding_len: c_int,
        ceil_mode_: c_int,
        count_include_pad_: c_int,
        divisor_override_v: i64,
        divisor_override_null: i8,
    );
    pub fn atg_avg_pool2d_out(
        out__: *mut *mut C_tensor,
        out_: *mut C_tensor,
        self_: *mut C_tensor,
        kernel_size_data: *const i64,
        kernel_size_len: c_int,
        stride_data: *const i64,
        stride_len: c_int,
        padding_data: *const i64,
        padding_len: c_int,
        ceil_mode_: c_int,
        count_include_pad_: c_int,
        divisor_override_v: i64,
        divisor_override_null: i8,
    );
    pub fn atg_avg_pool3d(
        out__: *mut *mut C_tensor,
        self_: *mut C_tensor,
        kernel_size_data: *const i64,
        kernel_size_len: c_int,
        stride_data: *const i64,
        stride_len: c_int,
        padding_data: *const i64,
        padding_len: c_int,
        ceil_mode_: c_int,
        count_include_pad_: c_int,
        divisor_override_v: i64,
        divisor_override_null: i8,
    );
    pub fn atg_avg_pool3d_backward(
        out__: *mut *mut C_tensor,
        grad_output_: *mut C_tensor,
        self_: *mut C_tensor,
        kernel_size_data: *const i64,
        kernel_size_len: c_int,
        stride_data: *const i64,
        stride_len: c_int,
        padding_data: *const i64,
        padding_len: c_int,
        ceil_mode_: c_int,
        count_include_pad_: c_int,
        divisor_override_v: i64,
        divisor_override_null: i8,
    );
    pub fn atg_avg_pool3d_backward_out(
        out__: *mut *mut C_tensor,
        grad_input_: *mut C_tensor,
        grad_output_: *mut C_tensor,
        self_: *mut C_tensor,
        kernel_size_data: *const i64,
        kernel_size_len: c_int,
        stride_data: *const i64,
        stride_len: c_int,
        padding_data: *const i64,
        padding_len: c_int,
        ceil_mode_: c_int,
        count_include_pad_: c_int,
        divisor_override_v: i64,
        divisor_override_null: i8,
    );
    pub fn atg_avg_pool3d_out(
        out__: *mut *mut C_tensor,
        out_: *mut C_tensor,
        self_: *mut C_tensor,
        kernel_size_data: *const i64,
        kernel_size_len: c_int,
        stride_data: *const i64,
        stride_len: c_int,
        padding_data: *const i64,
        padding_len: c_int,
        ceil_mode_: c_int,
        count_include_pad_: c_int,
        divisor_override_v: i64,
        divisor_override_null: i8,
    );
    pub fn atg_baddbmm(
        out__: *mut *mut C_tensor,
        self_: *mut C_tensor,
        batch1_: *mut C_tensor,
        batch2_: *mut C_tensor,
    );
    pub fn atg_baddbmm_(
        out__: *mut *mut C_tensor,
        self_: *mut C_tensor,
        batch1_: *mut C_tensor,
        batch2_: *mut C_tensor,
    );
    pub fn atg_baddbmm_out(
        out__: *mut *mut C_tensor,
        out_: *mut C_tensor,
        self_: *mut C_tensor,
        batch1_: *mut C_tensor,
        batch2_: *mut C_tensor,
    );
    pub fn atg_bartlett_window(
        out__: *mut *mut C_tensor,
        window_length_: i64,
        options_kind: c_int,
        options_device: c_int,
    );
    pub fn atg_bartlett_window1(
        out__: *mut *mut C_tensor,
        window_length_: i64,
        periodic_: c_int,
        options_kind: c_int,
        options_device: c_int,
    );
    pub fn atg_batch_norm(
        out__: *mut *mut C_tensor,
        input_: *mut C_tensor,
        weight_: *mut C_tensor,
        bias_: *mut C_tensor,
        running_mean_: *mut C_tensor,
        running_var_: *mut C_tensor,
        training_: c_int,
        momentum_: f64,
        eps_: f64,
        cudnn_enabled_: c_int,
    );
    pub fn atg_batch_norm_backward_elemt(
        out__: *mut *mut C_tensor,
        grad_out_: *mut C_tensor,
        input_: *mut C_tensor,
        mean_: *mut C_tensor,
        invstd_: *mut C_tensor,
        weight_: *mut C_tensor,
        mean_dy_: *mut C_tensor,
        mean_dy_xmu_: *mut C_tensor,
    );
    pub fn atg_batch_norm_backward_reduce(
        out__: *mut *mut C_tensor,
        grad_out_: *mut C_tensor,
        input_: *mut C_tensor,
        mean_: *mut C_tensor,
        invstd_: *mut C_tensor,
        weight_: *mut C_tensor,
        input_g_: c_int,
        weight_g_: c_int,
        bias_g_: c_int,
    );
    pub fn atg_batch_norm_elemt(
        out__: *mut *mut C_tensor,
        input_: *mut C_tensor,
        weight_: *mut C_tensor,
        bias_: *mut C_tensor,
        mean_: *mut C_tensor,
        invstd_: *mut C_tensor,
        eps_: f64,
    );
    pub fn atg_batch_norm_elemt_out(
        out__: *mut *mut C_tensor,
        out_: *mut C_tensor,
        input_: *mut C_tensor,
        weight_: *mut C_tensor,
        bias_: *mut C_tensor,
        mean_: *mut C_tensor,
        invstd_: *mut C_tensor,
        eps_: f64,
    );
    pub fn atg_batch_norm_gather_stats(
        out__: *mut *mut C_tensor,
        input_: *mut C_tensor,
        mean_: *mut C_tensor,
        invstd_: *mut C_tensor,
        running_mean_: *mut C_tensor,
        running_var_: *mut C_tensor,
        momentum_: f64,
        eps_: f64,
        count_: i64,
    );
    pub fn atg_batch_norm_gather_stats_with_counts(
        out__: *mut *mut C_tensor,
        input_: *mut C_tensor,
        mean_: *mut C_tensor,
        invstd_: *mut C_tensor,
        running_mean_: *mut C_tensor,
        running_var_: *mut C_tensor,
        momentum_: f64,
        eps_: f64,
        counts_: *mut C_tensor,
    );
    pub fn atg_batch_norm_stats(out__: *mut *mut C_tensor, input_: *mut C_tensor, eps_: f64);
    pub fn atg_batch_norm_update_stats(
        out__: *mut *mut C_tensor,
        input_: *mut C_tensor,
        running_mean_: *mut C_tensor,
        running_var_: *mut C_tensor,
        momentum_: f64,
    );
    pub fn atg_bernoulli(out__: *mut *mut C_tensor, self_: *mut C_tensor);
    pub fn atg_bernoulli1(out__: *mut *mut C_tensor, self_: *mut C_tensor, p_: f64);
    pub fn atg_bernoulli_(out__: *mut *mut C_tensor, self_: *mut C_tensor, p_: *mut C_tensor);
    pub fn atg_bernoulli_1(out__: *mut *mut C_tensor, self_: *mut C_tensor, p_: f64);
    pub fn atg_bernoulli_out(out__: *mut *mut C_tensor, out_: *mut C_tensor, self_: *mut C_tensor);
    pub fn atg_bilinear(
        out__: *mut *mut C_tensor,
        input1_: *mut C_tensor,
        input2_: *mut C_tensor,
        weight_: *mut C_tensor,
        bias_: *mut C_tensor,
    );
    pub fn atg_binary_cross_entropy(
        out__: *mut *mut C_tensor,
        self_: *mut C_tensor,
        target_: *mut C_tensor,
        weight_: *mut C_tensor,
        reduction_: i64,
    );
    pub fn atg_binary_cross_entropy_backward(
        out__: *mut *mut C_tensor,
        grad_output_: *mut C_tensor,
        self_: *mut C_tensor,
        target_: *mut C_tensor,
        weight_: *mut C_tensor,
        reduction_: i64,
    );
    pub fn atg_binary_cross_entropy_backward_out(
        out__: *mut *mut C_tensor,
        grad_input_: *mut C_tensor,
        grad_output_: *mut C_tensor,
        self_: *mut C_tensor,
        target_: *mut C_tensor,
        weight_: *mut C_tensor,
        reduction_: i64,
    );
    pub fn atg_binary_cross_entropy_out(
        out__: *mut *mut C_tensor,
        out_: *mut C_tensor,
        self_: *mut C_tensor,
        target_: *mut C_tensor,
        weight_: *mut C_tensor,
        reduction_: i64,
    );
    pub fn atg_binary_cross_entropy_with_logits(
        out__: *mut *mut C_tensor,
        self_: *mut C_tensor,
        target_: *mut C_tensor,
        weight_: *mut C_tensor,
        pos_weight_: *mut C_tensor,
        reduction_: i64,
    );
    pub fn atg_binary_cross_entropy_with_logits_backward(
        out__: *mut *mut C_tensor,
        grad_output_: *mut C_tensor,
        self_: *mut C_tensor,
        target_: *mut C_tensor,
        weight_: *mut C_tensor,
        pos_weight_: *mut C_tensor,
        reduction_: i64,
    );
    pub fn atg_bincount(
        out__: *mut *mut C_tensor,
        self_: *mut C_tensor,
        weights_: *mut C_tensor,
        minlength_: i64,
    );
    pub fn atg_binomial(out__: *mut *mut C_tensor, count_: *mut C_tensor, prob_: *mut C_tensor);
    pub fn atg_bitwise_and(out__: *mut *mut C_tensor, self_: *mut C_tensor, other_: *mut C_scalar);
    pub fn atg_bitwise_and1(out__: *mut *mut C_tensor, self_: *mut C_tensor, other_: *mut C_tensor);
    pub fn atg_bitwise_and_(out__: *mut *mut C_tensor, self_: *mut C_tensor, other_: *mut C_scalar);
    pub fn atg_bitwise_and_1(
        out__: *mut *mut C_tensor,
        self_: *mut C_tensor,
        other_: *mut C_tensor,
    );
    pub fn atg_bitwise_and_out(
        out__: *mut *mut C_tensor,
        out_: *mut C_tensor,
        self_: *mut C_tensor,
        other_: *mut C_tensor,
    );
    pub fn atg_bitwise_and_out1(
        out__: *mut *mut C_tensor,
        out_: *mut C_tensor,
        self_: *mut C_tensor,
        other_: *mut C_scalar,
    );
    pub fn atg_bitwise_not(out__: *mut *mut C_tensor, self_: *mut C_tensor);
    pub fn atg_bitwise_not_(out__: *mut *mut C_tensor, self_: *mut C_tensor);
    pub fn atg_bitwise_not_out(
        out__: *mut *mut C_tensor,
        out_: *mut C_tensor,
        self_: *mut C_tensor,
    );
    pub fn atg_bitwise_or(out__: *mut *mut C_tensor, self_: *mut C_tensor, other_: *mut C_scalar);
    pub fn atg_bitwise_or1(out__: *mut *mut C_tensor, self_: *mut C_tensor, other_: *mut C_tensor);
    pub fn atg_bitwise_or_(out__: *mut *mut C_tensor, self_: *mut C_tensor, other_: *mut C_scalar);
    pub fn atg_bitwise_or_1(out__: *mut *mut C_tensor, self_: *mut C_tensor, other_: *mut C_tensor);
    pub fn atg_bitwise_or_out(
        out__: *mut *mut C_tensor,
        out_: *mut C_tensor,
        self_: *mut C_tensor,
        other_: *mut C_tensor,
    );
    pub fn atg_bitwise_or_out1(
        out__: *mut *mut C_tensor,
        out_: *mut C_tensor,
        self_: *mut C_tensor,
        other_: *mut C_scalar,
    );
    pub fn atg_bitwise_xor(out__: *mut *mut C_tensor, self_: *mut C_tensor, other_: *mut C_scalar);
    pub fn atg_bitwise_xor1(out__: *mut *mut C_tensor, self_: *mut C_tensor, other_: *mut C_tensor);
    pub fn atg_bitwise_xor_(out__: *mut *mut C_tensor, self_: *mut C_tensor, other_: *mut C_scalar);
    pub fn atg_bitwise_xor_1(
        out__: *mut *mut C_tensor,
        self_: *mut C_tensor,
        other_: *mut C_tensor,
    );
    pub fn atg_bitwise_xor_out(
        out__: *mut *mut C_tensor,
        out_: *mut C_tensor,
        self_: *mut C_tensor,
        other_: *mut C_tensor,
    );
    pub fn atg_bitwise_xor_out1(
        out__: *mut *mut C_tensor,
        out_: *mut C_tensor,
        self_: *mut C_tensor,
        other_: *mut C_scalar,
    );
    pub fn atg_blackman_window(
        out__: *mut *mut C_tensor,
        window_length_: i64,
        options_kind: c_int,
        options_device: c_int,
    );
    pub fn atg_blackman_window1(
        out__: *mut *mut C_tensor,
        window_length_: i64,
        periodic_: c_int,
        options_kind: c_int,
        options_device: c_int,
    );
    pub fn atg_block_diag(
        out__: *mut *mut C_tensor,
        tensors_data: *const *mut C_tensor,
        tensors_len: c_int,
    );
    pub fn atg_bmm(out__: *mut *mut C_tensor, self_: *mut C_tensor, mat2_: *mut C_tensor);
    pub fn atg_bmm_out(
        out__: *mut *mut C_tensor,
        out_: *mut C_tensor,
        self_: *mut C_tensor,
        mat2_: *mut C_tensor,
    );
    pub fn atg_broadcast_tensors(
        tensors_data: *const *mut C_tensor,
        tensors_len: c_int,
    ) -> *mut *mut C_tensor;
    pub fn atg_broadcast_to(
        out__: *mut *mut C_tensor,
        self_: *mut C_tensor,
        size_data: *const i64,
        size_len: c_int,
    );
    pub fn atg_bucketize(
        out__: *mut *mut C_tensor,
        self_: *mut C_tensor,
        boundaries_: *mut C_tensor,
        out_int32_: c_int,
        right_: c_int,
    );
    pub fn atg_bucketize1(
        out__: *mut *mut C_tensor,
        self_scalar_: *mut C_scalar,
        boundaries_: *mut C_tensor,
        out_int32_: c_int,
        right_: c_int,
    );
    pub fn atg_bucketize_out(
        out__: *mut *mut C_tensor,
        out_: *mut C_tensor,
        self_: *mut C_tensor,
        boundaries_: *mut C_tensor,
        out_int32_: c_int,
        right_: c_int,
    );
    pub fn atg_cartesian_prod(
        out__: *mut *mut C_tensor,
        tensors_data: *const *mut C_tensor,
        tensors_len: c_int,
    );
    pub fn atg_cat(
        out__: *mut *mut C_tensor,
        tensors_data: *const *mut C_tensor,
        tensors_len: c_int,
        dim_: i64,
    );
    pub fn atg_cat_out(
        out__: *mut *mut C_tensor,
        out_: *mut C_tensor,
        tensors_data: *const *mut C_tensor,
        tensors_len: c_int,
        dim_: i64,
    );
    pub fn atg_cauchy_(out__: *mut *mut C_tensor, self_: *mut C_tensor, median_: f64, sigma_: f64);
    pub fn atg_cdist(
        out__: *mut *mut C_tensor,
        x1_: *mut C_tensor,
        x2_: *mut C_tensor,
        p_: f64,
        compute_mode_v: i64,
        compute_mode_null: i8,
    );
    pub fn atg_ceil(out__: *mut *mut C_tensor, self_: *mut C_tensor);
    pub fn atg_ceil_(out__: *mut *mut C_tensor, self_: *mut C_tensor);
    pub fn atg_ceil_out(out__: *mut *mut C_tensor, out_: *mut C_tensor, self_: *mut C_tensor);
    pub fn atg_celu(out__: *mut *mut C_tensor, self_: *mut C_tensor);
    pub fn atg_celu_(out__: *mut *mut C_tensor, self_: *mut C_tensor);
    pub fn atg_chain_matmul(
        out__: *mut *mut C_tensor,
        matrices_data: *const *mut C_tensor,
        matrices_len: c_int,
    );
    pub fn atg_channel_shuffle(out__: *mut *mut C_tensor, self_: *mut C_tensor, groups_: i64);
    pub fn atg_cholesky(out__: *mut *mut C_tensor, self_: *mut C_tensor, upper_: c_int);
    pub fn atg_cholesky_inverse(out__: *mut *mut C_tensor, self_: *mut C_tensor, upper_: c_int);
    pub fn atg_cholesky_inverse_out(
        out__: *mut *mut C_tensor,
        out_: *mut C_tensor,
        self_: *mut C_tensor,
        upper_: c_int,
    );
    pub fn atg_cholesky_out(
        out__: *mut *mut C_tensor,
        out_: *mut C_tensor,
        self_: *mut C_tensor,
        upper_: c_int,
    );
    pub fn atg_cholesky_solve(
        out__: *mut *mut C_tensor,
        self_: *mut C_tensor,
        input2_: *mut C_tensor,
        upper_: c_int,
    );
    pub fn atg_cholesky_solve_out(
        out__: *mut *mut C_tensor,
        out_: *mut C_tensor,
        self_: *mut C_tensor,
        input2_: *mut C_tensor,
        upper_: c_int,
    );
    pub fn atg_choose_qparams_optimized(
        out__: *mut *mut C_tensor,
        input_: *mut C_tensor,
        numel_: i64,
        n_bins_: i64,
        ratio_: f64,
        bit_width_: i64,
    );
    pub fn atg_chunk(self_: *mut C_tensor, chunks_: i64, dim_: i64) -> *mut *mut C_tensor;
    pub fn atg_clamp(
        out__: *mut *mut C_tensor,
        self_: *mut C_tensor,
        min_: *mut C_scalar,
        max_: *mut C_scalar,
    );
    pub fn atg_clamp_(
        out__: *mut *mut C_tensor,
        self_: *mut C_tensor,
        min_: *mut C_scalar,
        max_: *mut C_scalar,
    );
    pub fn atg_clamp_max(out__: *mut *mut C_tensor, self_: *mut C_tensor, max_: *mut C_scalar);
    pub fn atg_clamp_max_(out__: *mut *mut C_tensor, self_: *mut C_tensor, max_: *mut C_scalar);
    pub fn atg_clamp_max_out(
        out__: *mut *mut C_tensor,
        out_: *mut C_tensor,
        self_: *mut C_tensor,
        max_: *mut C_scalar,
    );
    pub fn atg_clamp_min(out__: *mut *mut C_tensor, self_: *mut C_tensor, min_: *mut C_scalar);
    pub fn atg_clamp_min_(out__: *mut *mut C_tensor, self_: *mut C_tensor, min_: *mut C_scalar);
    pub fn atg_clamp_min_out(
        out__: *mut *mut C_tensor,
        out_: *mut C_tensor,
        self_: *mut C_tensor,
        min_: *mut C_scalar,
    );
    pub fn atg_clamp_out(
        out__: *mut *mut C_tensor,
        out_: *mut C_tensor,
        self_: *mut C_tensor,
        min_: *mut C_scalar,
        max_: *mut C_scalar,
    );
    pub fn atg_clip(
        out__: *mut *mut C_tensor,
        self_: *mut C_tensor,
        min_: *mut C_scalar,
        max_: *mut C_scalar,
    );
    pub fn atg_clip_(
        out__: *mut *mut C_tensor,
        self_: *mut C_tensor,
        min_: *mut C_scalar,
        max_: *mut C_scalar,
    );
    pub fn atg_clip_out(
        out__: *mut *mut C_tensor,
        out_: *mut C_tensor,
        self_: *mut C_tensor,
        min_: *mut C_scalar,
        max_: *mut C_scalar,
    );
    pub fn atg_coalesce(out__: *mut *mut C_tensor, self_: *mut C_tensor);
    pub fn atg_col2im(
        out__: *mut *mut C_tensor,
        self_: *mut C_tensor,
        output_size_data: *const i64,
        output_size_len: c_int,
        kernel_size_data: *const i64,
        kernel_size_len: c_int,
        dilation_data: *const i64,
        dilation_len: c_int,
        padding_data: *const i64,
        padding_len: c_int,
        stride_data: *const i64,
        stride_len: c_int,
    );
    pub fn atg_col2im_backward(
        out__: *mut *mut C_tensor,
        grad_output_: *mut C_tensor,
        kernel_size_data: *const i64,
        kernel_size_len: c_int,
        dilation_data: *const i64,
        dilation_len: c_int,
        padding_data: *const i64,
        padding_len: c_int,
        stride_data: *const i64,
        stride_len: c_int,
    );
    pub fn atg_col2im_backward_out(
        out__: *mut *mut C_tensor,
        grad_input_: *mut C_tensor,
        grad_output_: *mut C_tensor,
        kernel_size_data: *const i64,
        kernel_size_len: c_int,
        dilation_data: *const i64,
        dilation_len: c_int,
        padding_data: *const i64,
        padding_len: c_int,
        stride_data: *const i64,
        stride_len: c_int,
    );
    pub fn atg_col2im_out(
        out__: *mut *mut C_tensor,
        out_: *mut C_tensor,
        self_: *mut C_tensor,
        output_size_data: *const i64,
        output_size_len: c_int,
        kernel_size_data: *const i64,
        kernel_size_len: c_int,
        dilation_data: *const i64,
        dilation_len: c_int,
        padding_data: *const i64,
        padding_len: c_int,
        stride_data: *const i64,
        stride_len: c_int,
    );
    pub fn atg_column_stack(
        out__: *mut *mut C_tensor,
        tensors_data: *const *mut C_tensor,
        tensors_len: c_int,
    );
    pub fn atg_column_stack_out(
        out__: *mut *mut C_tensor,
        out_: *mut C_tensor,
        tensors_data: *const *mut C_tensor,
        tensors_len: c_int,
    );
    pub fn atg_combinations(
        out__: *mut *mut C_tensor,
        self_: *mut C_tensor,
        r_: i64,
        with_replacement_: c_int,
    );
    pub fn atg_complex(out__: *mut *mut C_tensor, real_: *mut C_tensor, imag_: *mut C_tensor);
    pub fn atg_complex_out(
        out__: *mut *mut C_tensor,
        out_: *mut C_tensor,
        real_: *mut C_tensor,
        imag_: *mut C_tensor,
    );
    pub fn atg_conj(out__: *mut *mut C_tensor, self_: *mut C_tensor);
    pub fn atg_conj_out(out__: *mut *mut C_tensor, out_: *mut C_tensor, self_: *mut C_tensor);
    pub fn atg_constant_pad_nd(
        out__: *mut *mut C_tensor,
        self_: *mut C_tensor,
        pad_data: *const i64,
        pad_len: c_int,
    );
    pub fn atg_contiguous(out__: *mut *mut C_tensor, self_: *mut C_tensor);
    pub fn atg_conv1d(
        out__: *mut *mut C_tensor,
        input_: *mut C_tensor,
        weight_: *mut C_tensor,
        bias_: *mut C_tensor,
        stride_data: *const i64,
        stride_len: c_int,
        padding_data: *const i64,
        padding_len: c_int,
        dilation_data: *const i64,
        dilation_len: c_int,
        groups_: i64,
    );
    pub fn atg_conv2d(
        out__: *mut *mut C_tensor,
        input_: *mut C_tensor,
        weight_: *mut C_tensor,
        bias_: *mut C_tensor,
        stride_data: *const i64,
        stride_len: c_int,
        padding_data: *const i64,
        padding_len: c_int,
        dilation_data: *const i64,
        dilation_len: c_int,
        groups_: i64,
    );
    pub fn atg_conv3d(
        out__: *mut *mut C_tensor,
        input_: *mut C_tensor,
        weight_: *mut C_tensor,
        bias_: *mut C_tensor,
        stride_data: *const i64,
        stride_len: c_int,
        padding_data: *const i64,
        padding_len: c_int,
        dilation_data: *const i64,
        dilation_len: c_int,
        groups_: i64,
    );
    pub fn atg_conv_tbc(
        out__: *mut *mut C_tensor,
        self_: *mut C_tensor,
        weight_: *mut C_tensor,
        bias_: *mut C_tensor,
        pad_: i64,
    );
    pub fn atg_conv_tbc_backward(
        out__: *mut *mut C_tensor,
        self_: *mut C_tensor,
        input_: *mut C_tensor,
        weight_: *mut C_tensor,
        bias_: *mut C_tensor,
        pad_: i64,
    );
    pub fn atg_conv_transpose1d(
        out__: *mut *mut C_tensor,
        input_: *mut C_tensor,
        weight_: *mut C_tensor,
        bias_: *mut C_tensor,
        stride_data: *const i64,
        stride_len: c_int,
        padding_data: *const i64,
        padding_len: c_int,
        output_padding_data: *const i64,
        output_padding_len: c_int,
        groups_: i64,
        dilation_data: *const i64,
        dilation_len: c_int,
    );
    pub fn atg_conv_transpose2d(
        out__: *mut *mut C_tensor,
        input_: *mut C_tensor,
        weight_: *mut C_tensor,
        bias_: *mut C_tensor,
        stride_data: *const i64,
        stride_len: c_int,
        padding_data: *const i64,
        padding_len: c_int,
        output_padding_data: *const i64,
        output_padding_len: c_int,
        groups_: i64,
        dilation_data: *const i64,
        dilation_len: c_int,
    );
    pub fn atg_conv_transpose3d(
        out__: *mut *mut C_tensor,
        input_: *mut C_tensor,
        weight_: *mut C_tensor,
        bias_: *mut C_tensor,
        stride_data: *const i64,
        stride_len: c_int,
        padding_data: *const i64,
        padding_len: c_int,
        output_padding_data: *const i64,
        output_padding_len: c_int,
        groups_: i64,
        dilation_data: *const i64,
        dilation_len: c_int,
    );
    pub fn atg_convolution(
        out__: *mut *mut C_tensor,
        input_: *mut C_tensor,
        weight_: *mut C_tensor,
        bias_: *mut C_tensor,
        stride_data: *const i64,
        stride_len: c_int,
        padding_data: *const i64,
        padding_len: c_int,
        dilation_data: *const i64,
        dilation_len: c_int,
        transposed_: c_int,
        output_padding_data: *const i64,
        output_padding_len: c_int,
        groups_: i64,
    );
    pub fn atg_convolution_overrideable(
        out__: *mut *mut C_tensor,
        input_: *mut C_tensor,
        weight_: *mut C_tensor,
        bias_: *mut C_tensor,
        stride_data: *const i64,
        stride_len: c_int,
        padding_data: *const i64,
        padding_len: c_int,
        dilation_data: *const i64,
        dilation_len: c_int,
        transposed_: c_int,
        output_padding_data: *const i64,
        output_padding_len: c_int,
        groups_: i64,
    );
    pub fn atg_copy_sparse_to_sparse_(
        out__: *mut *mut C_tensor,
        self_: *mut C_tensor,
        src_: *mut C_tensor,
        non_blocking_: c_int,
    );
    pub fn atg_copysign(out__: *mut *mut C_tensor, self_: *mut C_tensor, other_: *mut C_tensor);
    pub fn atg_copysign1(out__: *mut *mut C_tensor, self_: *mut C_tensor, other_: *mut C_scalar);
    pub fn atg_copysign_(out__: *mut *mut C_tensor, self_: *mut C_tensor, other_: *mut C_tensor);
    pub fn atg_copysign_1(out__: *mut *mut C_tensor, self_: *mut C_tensor, other_: *mut C_scalar);
    pub fn atg_copysign_out(
        out__: *mut *mut C_tensor,
        out_: *mut C_tensor,
        self_: *mut C_tensor,
        other_: *mut C_tensor,
    );
    pub fn atg_cos(out__: *mut *mut C_tensor, self_: *mut C_tensor);
    pub fn atg_cos_(out__: *mut *mut C_tensor, self_: *mut C_tensor);
    pub fn atg_cos_out(out__: *mut *mut C_tensor, out_: *mut C_tensor, self_: *mut C_tensor);
    pub fn atg_cosh(out__: *mut *mut C_tensor, self_: *mut C_tensor);
    pub fn atg_cosh_(out__: *mut *mut C_tensor, self_: *mut C_tensor);
    pub fn atg_cosh_out(out__: *mut *mut C_tensor, out_: *mut C_tensor, self_: *mut C_tensor);
    pub fn atg_cosine_embedding_loss(
        out__: *mut *mut C_tensor,
        input1_: *mut C_tensor,
        input2_: *mut C_tensor,
        target_: *mut C_tensor,
        margin_: f64,
        reduction_: i64,
    );
    pub fn atg_cosine_similarity(
        out__: *mut *mut C_tensor,
        x1_: *mut C_tensor,
        x2_: *mut C_tensor,
        dim_: i64,
        eps_: f64,
    );
    pub fn atg_count_nonzero(
        out__: *mut *mut C_tensor,
        self_: *mut C_tensor,
        dim_data: *const i64,
        dim_len: c_int,
    );
    pub fn atg_count_nonzero1(
        out__: *mut *mut C_tensor,
        self_: *mut C_tensor,
        dim_v: i64,
        dim_null: i8,
    );
    pub fn atg_cross(
        out__: *mut *mut C_tensor,
        self_: *mut C_tensor,
        other_: *mut C_tensor,
        dim_v: i64,
        dim_null: i8,
    );
    pub fn atg_cross_out(
        out__: *mut *mut C_tensor,
        out_: *mut C_tensor,
        self_: *mut C_tensor,
        other_: *mut C_tensor,
        dim_v: i64,
        dim_null: i8,
    );
    pub fn atg_ctc_loss(
        out__: *mut *mut C_tensor,
        log_probs_: *mut C_tensor,
        targets_: *mut C_tensor,
        input_lengths_data: *const i64,
        input_lengths_len: c_int,
        target_lengths_data: *const i64,
        target_lengths_len: c_int,
        blank_: i64,
        reduction_: i64,
        zero_infinity_: c_int,
    );
    pub fn atg_ctc_loss1(
        out__: *mut *mut C_tensor,
        log_probs_: *mut C_tensor,
        targets_: *mut C_tensor,
        input_lengths_: *mut C_tensor,
        target_lengths_: *mut C_tensor,
        blank_: i64,
        reduction_: i64,
        zero_infinity_: c_int,
    );
    pub fn atg_cudnn_affine_grid_generator(
        out__: *mut *mut C_tensor,
        theta_: *mut C_tensor,
        n_: i64,
        C_: i64,
        H_: i64,
        W_: i64,
    );
    pub fn atg_cudnn_affine_grid_generator_backward(
        out__: *mut *mut C_tensor,
        grad_: *mut C_tensor,
        n_: i64,
        C_: i64,
        H_: i64,
        W_: i64,
    );
    pub fn atg_cudnn_batch_norm(
        out__: *mut *mut C_tensor,
        input_: *mut C_tensor,
        weight_: *mut C_tensor,
        bias_: *mut C_tensor,
        running_mean_: *mut C_tensor,
        running_var_: *mut C_tensor,
        training_: c_int,
        exponential_average_factor_: f64,
        epsilon_: f64,
    );
    pub fn atg_cudnn_batch_norm_backward(
        out__: *mut *mut C_tensor,
        input_: *mut C_tensor,
        grad_output_: *mut C_tensor,
        weight_: *mut C_tensor,
        running_mean_: *mut C_tensor,
        running_var_: *mut C_tensor,
        save_mean_: *mut C_tensor,
        save_var_: *mut C_tensor,
        epsilon_: f64,
        reserveSpace_: *mut C_tensor,
    );
    pub fn atg_cudnn_convolution(
        out__: *mut *mut C_tensor,
        self_: *mut C_tensor,
        weight_: *mut C_tensor,
        padding_data: *const i64,
        padding_len: c_int,
        stride_data: *const i64,
        stride_len: c_int,
        dilation_data: *const i64,
        dilation_len: c_int,
        groups_: i64,
        benchmark_: c_int,
        deterministic_: c_int,
    );
    pub fn atg_cudnn_convolution1(
        out__: *mut *mut C_tensor,
        self_: *mut C_tensor,
        weight_: *mut C_tensor,
        bias_: *mut C_tensor,
        padding_data: *const i64,
        padding_len: c_int,
        stride_data: *const i64,
        stride_len: c_int,
        dilation_data: *const i64,
        dilation_len: c_int,
        groups_: i64,
        benchmark_: c_int,
        deterministic_: c_int,
    );
    pub fn atg_cudnn_convolution2(
        out__: *mut *mut C_tensor,
        self_: *mut C_tensor,
        weight_: *mut C_tensor,
        padding_data: *const i64,
        padding_len: c_int,
        stride_data: *const i64,
        stride_len: c_int,
        dilation_data: *const i64,
        dilation_len: c_int,
        groups_: i64,
        benchmark_: c_int,
        deterministic_: c_int,
        allow_tf32_: c_int,
    );
    pub fn atg_cudnn_convolution_backward_input(
        out__: *mut *mut C_tensor,
        self_size_data: *const i64,
        self_size_len: c_int,
        grad_output_: *mut C_tensor,
        weight_: *mut C_tensor,
        padding_data: *const i64,
        padding_len: c_int,
        stride_data: *const i64,
        stride_len: c_int,
        dilation_data: *const i64,
        dilation_len: c_int,
        groups_: i64,
        benchmark_: c_int,
        deterministic_: c_int,
        allow_tf32_: c_int,
    );
    pub fn atg_cudnn_convolution_backward_weight(
        out__: *mut *mut C_tensor,
        weight_size_data: *const i64,
        weight_size_len: c_int,
        grad_output_: *mut C_tensor,
        self_: *mut C_tensor,
        padding_data: *const i64,
        padding_len: c_int,
        stride_data: *const i64,
        stride_len: c_int,
        dilation_data: *const i64,
        dilation_len: c_int,
        groups_: i64,
        benchmark_: c_int,
        deterministic_: c_int,
        allow_tf32_: c_int,
    );
    pub fn atg_cudnn_convolution_transpose(
        out__: *mut *mut C_tensor,
        self_: *mut C_tensor,
        weight_: *mut C_tensor,
        padding_data: *const i64,
        padding_len: c_int,
        output_padding_data: *const i64,
        output_padding_len: c_int,
        stride_data: *const i64,
        stride_len: c_int,
        dilation_data: *const i64,
        dilation_len: c_int,
        groups_: i64,
        benchmark_: c_int,
        deterministic_: c_int,
    );
    pub fn atg_cudnn_convolution_transpose1(
        out__: *mut *mut C_tensor,
        self_: *mut C_tensor,
        weight_: *mut C_tensor,
        bias_: *mut C_tensor,
        padding_data: *const i64,
        padding_len: c_int,
        output_padding_data: *const i64,
        output_padding_len: c_int,
        stride_data: *const i64,
        stride_len: c_int,
        dilation_data: *const i64,
        dilation_len: c_int,
        groups_: i64,
        benchmark_: c_int,
        deterministic_: c_int,
    );
    pub fn atg_cudnn_convolution_transpose2(
        out__: *mut *mut C_tensor,
        self_: *mut C_tensor,
        weight_: *mut C_tensor,
        padding_data: *const i64,
        padding_len: c_int,
        output_padding_data: *const i64,
        output_padding_len: c_int,
        stride_data: *const i64,
        stride_len: c_int,
        dilation_data: *const i64,
        dilation_len: c_int,
        groups_: i64,
        benchmark_: c_int,
        deterministic_: c_int,
        allow_tf32_: c_int,
    );
    pub fn atg_cudnn_convolution_transpose_backward_input(
        out__: *mut *mut C_tensor,
        grad_output_: *mut C_tensor,
        weight_: *mut C_tensor,
        padding_data: *const i64,
        padding_len: c_int,
        stride_data: *const i64,
        stride_len: c_int,
        dilation_data: *const i64,
        dilation_len: c_int,
        groups_: i64,
        benchmark_: c_int,
        deterministic_: c_int,
        allow_tf32_: c_int,
    );
    pub fn atg_cudnn_convolution_transpose_backward_weight(
        out__: *mut *mut C_tensor,
        weight_size_data: *const i64,
        weight_size_len: c_int,
        grad_output_: *mut C_tensor,
        self_: *mut C_tensor,
        padding_data: *const i64,
        padding_len: c_int,
        stride_data: *const i64,
        stride_len: c_int,
        dilation_data: *const i64,
        dilation_len: c_int,
        groups_: i64,
        benchmark_: c_int,
        deterministic_: c_int,
        allow_tf32_: c_int,
    );
    pub fn atg_cudnn_grid_sampler(
        out__: *mut *mut C_tensor,
        self_: *mut C_tensor,
        grid_: *mut C_tensor,
    );
    pub fn atg_cudnn_grid_sampler_backward(
        out__: *mut *mut C_tensor,
        self_: *mut C_tensor,
        grid_: *mut C_tensor,
        grad_output_: *mut C_tensor,
    );
    pub fn atg_cummax(out__: *mut *mut C_tensor, self_: *mut C_tensor, dim_: i64);
    pub fn atg_cummax_out(
        out__: *mut *mut C_tensor,
        values_: *mut C_tensor,
        indices_: *mut C_tensor,
        self_: *mut C_tensor,
        dim_: i64,
    );
    pub fn atg_cummaxmin_backward(
        out__: *mut *mut C_tensor,
        grad_: *mut C_tensor,
        input_: *mut C_tensor,
        indices_: *mut C_tensor,
        dim_: i64,
    );
    pub fn atg_cummin(out__: *mut *mut C_tensor, self_: *mut C_tensor, dim_: i64);
    pub fn atg_cummin_out(
        out__: *mut *mut C_tensor,
        values_: *mut C_tensor,
        indices_: *mut C_tensor,
        self_: *mut C_tensor,
        dim_: i64,
    );
    pub fn atg_cumprod(out__: *mut *mut C_tensor, self_: *mut C_tensor, dim_: i64, dtype_: c_int);
    pub fn atg_cumprod_(out__: *mut *mut C_tensor, self_: *mut C_tensor, dim_: i64, dtype_: c_int);
    pub fn atg_cumprod_backward(
        out__: *mut *mut C_tensor,
        grad_: *mut C_tensor,
        input_: *mut C_tensor,
        dim_: i64,
    );
    pub fn atg_cumprod_out(
        out__: *mut *mut C_tensor,
        out_: *mut C_tensor,
        self_: *mut C_tensor,
        dim_: i64,
        dtype_: c_int,
    );
    pub fn atg_cumsum(out__: *mut *mut C_tensor, self_: *mut C_tensor, dim_: i64, dtype_: c_int);
    pub fn atg_cumsum_(out__: *mut *mut C_tensor, self_: *mut C_tensor, dim_: i64, dtype_: c_int);
    pub fn atg_cumsum_out(
        out__: *mut *mut C_tensor,
        out_: *mut C_tensor,
        self_: *mut C_tensor,
        dim_: i64,
        dtype_: c_int,
    );
    pub fn atg_data(out__: *mut *mut C_tensor, self_: *mut C_tensor);
    pub fn atg_deg2rad(out__: *mut *mut C_tensor, self_: *mut C_tensor);
    pub fn atg_deg2rad_(out__: *mut *mut C_tensor, self_: *mut C_tensor);
    pub fn atg_deg2rad_out(out__: *mut *mut C_tensor, out_: *mut C_tensor, self_: *mut C_tensor);
    pub fn atg_dequantize(out__: *mut *mut C_tensor, self_: *mut C_tensor);
    pub fn atg_dequantize1(
        tensors_data: *const *mut C_tensor,
        tensors_len: c_int,
    ) -> *mut *mut C_tensor;
    pub fn atg_det(out__: *mut *mut C_tensor, self_: *mut C_tensor);
    pub fn atg_detach(out__: *mut *mut C_tensor, self_: *mut C_tensor);
    pub fn atg_detach_(out__: *mut *mut C_tensor, self_: *mut C_tensor);
    pub fn atg_diag(out__: *mut *mut C_tensor, self_: *mut C_tensor, diagonal_: i64);
    pub fn atg_diag_backward(
        out__: *mut *mut C_tensor,
        grad_: *mut C_tensor,
        input_sizes_data: *const i64,
        input_sizes_len: c_int,
        diagonal_: i64,
    );
    pub fn atg_diag_embed(
        out__: *mut *mut C_tensor,
        self_: *mut C_tensor,
        offset_: i64,
        dim1_: i64,
        dim2_: i64,
    );
    pub fn atg_diag_out(
        out__: *mut *mut C_tensor,
        out_: *mut C_tensor,
        self_: *mut C_tensor,
        diagonal_: i64,
    );
    pub fn atg_diagflat(out__: *mut *mut C_tensor, self_: *mut C_tensor, offset_: i64);
    pub fn atg_diagonal(
        out__: *mut *mut C_tensor,
        self_: *mut C_tensor,
        offset_: i64,
        dim1_: i64,
        dim2_: i64,
    );
    pub fn atg_diagonal_backward(
        out__: *mut *mut C_tensor,
        grad_: *mut C_tensor,
        input_sizes_data: *const i64,
        input_sizes_len: c_int,
        offset_: i64,
        dim1_: i64,
        dim2_: i64,
    );
    pub fn atg_diff(
        out__: *mut *mut C_tensor,
        self_: *mut C_tensor,
        n_: i64,
        dim_: i64,
        prepend_: *mut C_tensor,
        append_: *mut C_tensor,
    );
    pub fn atg_diff_out(
        out__: *mut *mut C_tensor,
        out_: *mut C_tensor,
        self_: *mut C_tensor,
        n_: i64,
        dim_: i64,
        prepend_: *mut C_tensor,
        append_: *mut C_tensor,
    );
    pub fn atg_digamma(out__: *mut *mut C_tensor, self_: *mut C_tensor);
    pub fn atg_digamma_(out__: *mut *mut C_tensor, self_: *mut C_tensor);
    pub fn atg_digamma_out(out__: *mut *mut C_tensor, out_: *mut C_tensor, self_: *mut C_tensor);
    pub fn atg_dist(out__: *mut *mut C_tensor, self_: *mut C_tensor, other_: *mut C_tensor);
    pub fn atg_div(out__: *mut *mut C_tensor, self_: *mut C_tensor, other_: *mut C_tensor);
    pub fn atg_div1(out__: *mut *mut C_tensor, self_: *mut C_tensor, other_: *mut C_scalar);
    pub fn atg_div2(
        out__: *mut *mut C_tensor,
        self_: *mut C_tensor,
        other_: *mut C_tensor,
        rounding_mode_ptr: *const u8,
        rounding_mode_len: c_int,
    );
    pub fn atg_div3(
        out__: *mut *mut C_tensor,
        self_: *mut C_tensor,
        other_: *mut C_scalar,
        rounding_mode_ptr: *const u8,
        rounding_mode_len: c_int,
    );
    pub fn atg_div_(out__: *mut *mut C_tensor, self_: *mut C_tensor, other_: *mut C_tensor);
    pub fn atg_div_1(out__: *mut *mut C_tensor, self_: *mut C_tensor, other_: *mut C_scalar);
    pub fn atg_div_2(
        out__: *mut *mut C_tensor,
        self_: *mut C_tensor,
        other_: *mut C_tensor,
        rounding_mode_ptr: *const u8,
        rounding_mode_len: c_int,
    );
    pub fn atg_div_3(
        out__: *mut *mut C_tensor,
        self_: *mut C_tensor,
        other_: *mut C_scalar,
        rounding_mode_ptr: *const u8,
        rounding_mode_len: c_int,
    );
    pub fn atg_div_out(
        out__: *mut *mut C_tensor,
        out_: *mut C_tensor,
        self_: *mut C_tensor,
        other_: *mut C_tensor,
    );
    pub fn atg_div_out1(
        out__: *mut *mut C_tensor,
        out_: *mut C_tensor,
        self_: *mut C_tensor,
        other_: *mut C_tensor,
        rounding_mode_ptr: *const u8,
        rounding_mode_len: c_int,
    );
    pub fn atg_divide(out__: *mut *mut C_tensor, self_: *mut C_tensor, other_: *mut C_tensor);
    pub fn atg_divide1(out__: *mut *mut C_tensor, self_: *mut C_tensor, other_: *mut C_scalar);
    pub fn atg_divide2(
        out__: *mut *mut C_tensor,
        self_: *mut C_tensor,
        other_: *mut C_tensor,
        rounding_mode_ptr: *const u8,
        rounding_mode_len: c_int,
    );
    pub fn atg_divide3(
        out__: *mut *mut C_tensor,
        self_: *mut C_tensor,
        other_: *mut C_scalar,
        rounding_mode_ptr: *const u8,
        rounding_mode_len: c_int,
    );
    pub fn atg_divide_(out__: *mut *mut C_tensor, self_: *mut C_tensor, other_: *mut C_tensor);
    pub fn atg_divide_1(out__: *mut *mut C_tensor, self_: *mut C_tensor, other_: *mut C_scalar);
    pub fn atg_divide_2(
        out__: *mut *mut C_tensor,
        self_: *mut C_tensor,
        other_: *mut C_tensor,
        rounding_mode_ptr: *const u8,
        rounding_mode_len: c_int,
    );
    pub fn atg_divide_3(
        out__: *mut *mut C_tensor,
        self_: *mut C_tensor,
        other_: *mut C_scalar,
        rounding_mode_ptr: *const u8,
        rounding_mode_len: c_int,
    );
    pub fn atg_divide_out(
        out__: *mut *mut C_tensor,
        out_: *mut C_tensor,
        self_: *mut C_tensor,
        other_: *mut C_tensor,
    );
    pub fn atg_divide_out1(
        out__: *mut *mut C_tensor,
        out_: *mut C_tensor,
        self_: *mut C_tensor,
        other_: *mut C_tensor,
        rounding_mode_ptr: *const u8,
        rounding_mode_len: c_int,
    );
    pub fn atg_dot(out__: *mut *mut C_tensor, self_: *mut C_tensor, tensor_: *mut C_tensor);
    pub fn atg_dot_out(
        out__: *mut *mut C_tensor,
        out_: *mut C_tensor,
        self_: *mut C_tensor,
        tensor_: *mut C_tensor,
    );
    pub fn atg_dropout(out__: *mut *mut C_tensor, input_: *mut C_tensor, p_: f64, train_: c_int);
    pub fn atg_dropout_(out__: *mut *mut C_tensor, self_: *mut C_tensor, p_: f64, train_: c_int);
    pub fn atg_dstack(
        out__: *mut *mut C_tensor,
        tensors_data: *const *mut C_tensor,
        tensors_len: c_int,
    );
    pub fn atg_dstack_out(
        out__: *mut *mut C_tensor,
        out_: *mut C_tensor,
        tensors_data: *const *mut C_tensor,
        tensors_len: c_int,
    );
    pub fn atg_eig(out__: *mut *mut C_tensor, self_: *mut C_tensor, eigenvectors_: c_int);
    pub fn atg_eig_out(
        out__: *mut *mut C_tensor,
        e_: *mut C_tensor,
        v_: *mut C_tensor,
        self_: *mut C_tensor,
        eigenvectors_: c_int,
    );
    pub fn atg_einsum(
        out__: *mut *mut C_tensor,
        equation_ptr: *const u8,
        equation_len: c_int,
        tensors_data: *const *mut C_tensor,
        tensors_len: c_int,
    );
    pub fn atg_elu(out__: *mut *mut C_tensor, self_: *mut C_tensor);
    pub fn atg_elu_(out__: *mut *mut C_tensor, self_: *mut C_tensor);
    pub fn atg_elu_backward(
        out__: *mut *mut C_tensor,
        grad_output_: *mut C_tensor,
        alpha_: *mut C_scalar,
        scale_: *mut C_scalar,
        input_scale_: *mut C_scalar,
        is_result_: c_int,
        self_or_result_: *mut C_tensor,
    );
    pub fn atg_elu_out(out__: *mut *mut C_tensor, out_: *mut C_tensor, self_: *mut C_tensor);
    pub fn atg_embedding(
        out__: *mut *mut C_tensor,
        weight_: *mut C_tensor,
        indices_: *mut C_tensor,
        padding_idx_: i64,
        scale_grad_by_freq_: c_int,
        sparse_: c_int,
    );
    pub fn atg_embedding_backward(
        out__: *mut *mut C_tensor,
        grad_: *mut C_tensor,
        indices_: *mut C_tensor,
        num_weights_: i64,
        padding_idx_: i64,
        scale_grad_by_freq_: c_int,
        sparse_: c_int,
    );
    pub fn atg_embedding_bag(
        out__: *mut *mut C_tensor,
        weight_: *mut C_tensor,
        indices_: *mut C_tensor,
        offsets_: *mut C_tensor,
        scale_grad_by_freq_: c_int,
        mode_: i64,
        sparse_: c_int,
        per_sample_weights_: *mut C_tensor,
        include_last_offset_: c_int,
    );
    pub fn atg_embedding_dense_backward(
        out__: *mut *mut C_tensor,
        grad_output_: *mut C_tensor,
        indices_: *mut C_tensor,
        num_weights_: i64,
        padding_idx_: i64,
        scale_grad_by_freq_: c_int,
    );
    pub fn atg_embedding_renorm_(
        out__: *mut *mut C_tensor,
        self_: *mut C_tensor,
        indices_: *mut C_tensor,
        max_norm_: f64,
        norm_type_: f64,
    );
    pub fn atg_embedding_sparse_backward(
        out__: *mut *mut C_tensor,
        grad_: *mut C_tensor,
        indices_: *mut C_tensor,
        num_weights_: i64,
        padding_idx_: i64,
        scale_grad_by_freq_: c_int,
    );
    pub fn atg_empty(
        out__: *mut *mut C_tensor,
        size_data: *const i64,
        size_len: c_int,
        options_kind: c_int,
        options_device: c_int,
    );
    pub fn atg_empty_like(out__: *mut *mut C_tensor, self_: *mut C_tensor);
    pub fn atg_empty_meta(
        out__: *mut *mut C_tensor,
        size_data: *const i64,
        size_len: c_int,
        options_kind: c_int,
        options_device: c_int,
    );
    pub fn atg_empty_out(
        out__: *mut *mut C_tensor,
        out_: *mut C_tensor,
        size_data: *const i64,
        size_len: c_int,
    );
    pub fn atg_empty_quantized(
        out__: *mut *mut C_tensor,
        size_data: *const i64,
        size_len: c_int,
        qtensor_: *mut C_tensor,
    );
    pub fn atg_empty_strided(
        out__: *mut *mut C_tensor,
        size_data: *const i64,
        size_len: c_int,
        stride_data: *const i64,
        stride_len: c_int,
        options_kind: c_int,
        options_device: c_int,
    );
    pub fn atg_eq(out__: *mut *mut C_tensor, self_: *mut C_tensor, other_: *mut C_scalar);
    pub fn atg_eq1(out__: *mut *mut C_tensor, self_: *mut C_tensor, other_: *mut C_tensor);
    pub fn atg_eq_(out__: *mut *mut C_tensor, self_: *mut C_tensor, other_: *mut C_scalar);
    pub fn atg_eq_1(out__: *mut *mut C_tensor, self_: *mut C_tensor, other_: *mut C_tensor);
    pub fn atg_eq_out(
        out__: *mut *mut C_tensor,
        out_: *mut C_tensor,
        self_: *mut C_tensor,
        other_: *mut C_scalar,
    );
    pub fn atg_eq_out1(
        out__: *mut *mut C_tensor,
        out_: *mut C_tensor,
        self_: *mut C_tensor,
        other_: *mut C_tensor,
    );
    pub fn atg_erf(out__: *mut *mut C_tensor, self_: *mut C_tensor);
    pub fn atg_erf_(out__: *mut *mut C_tensor, self_: *mut C_tensor);
    pub fn atg_erf_out(out__: *mut *mut C_tensor, out_: *mut C_tensor, self_: *mut C_tensor);
    pub fn atg_erfc(out__: *mut *mut C_tensor, self_: *mut C_tensor);
    pub fn atg_erfc_(out__: *mut *mut C_tensor, self_: *mut C_tensor);
    pub fn atg_erfc_out(out__: *mut *mut C_tensor, out_: *mut C_tensor, self_: *mut C_tensor);
    pub fn atg_erfinv(out__: *mut *mut C_tensor, self_: *mut C_tensor);
    pub fn atg_erfinv_(out__: *mut *mut C_tensor, self_: *mut C_tensor);
    pub fn atg_erfinv_out(out__: *mut *mut C_tensor, out_: *mut C_tensor, self_: *mut C_tensor);
    pub fn atg_exp(out__: *mut *mut C_tensor, self_: *mut C_tensor);
    pub fn atg_exp2(out__: *mut *mut C_tensor, self_: *mut C_tensor);
    pub fn atg_exp2_(out__: *mut *mut C_tensor, self_: *mut C_tensor);
    pub fn atg_exp2_out(out__: *mut *mut C_tensor, out_: *mut C_tensor, self_: *mut C_tensor);
    pub fn atg_exp_(out__: *mut *mut C_tensor, self_: *mut C_tensor);
    pub fn atg_exp_out(out__: *mut *mut C_tensor, out_: *mut C_tensor, self_: *mut C_tensor);
    pub fn atg_expand(
        out__: *mut *mut C_tensor,
        self_: *mut C_tensor,
        size_data: *const i64,
        size_len: c_int,
        implicit_: c_int,
    );
    pub fn atg_expand_as(out__: *mut *mut C_tensor, self_: *mut C_tensor, other_: *mut C_tensor);
    pub fn atg_expm1(out__: *mut *mut C_tensor, self_: *mut C_tensor);
    pub fn atg_expm1_(out__: *mut *mut C_tensor, self_: *mut C_tensor);
    pub fn atg_expm1_out(out__: *mut *mut C_tensor, out_: *mut C_tensor, self_: *mut C_tensor);
    pub fn atg_exponential_(out__: *mut *mut C_tensor, self_: *mut C_tensor, lambd_: f64);
    pub fn atg_eye(out__: *mut *mut C_tensor, n_: i64, options_kind: c_int, options_device: c_int);
    pub fn atg_eye1(
        out__: *mut *mut C_tensor,
        n_: i64,
        m_: i64,
        options_kind: c_int,
        options_device: c_int,
    );
    pub fn atg_eye_out(out__: *mut *mut C_tensor, out_: *mut C_tensor, n_: i64);
    pub fn atg_eye_out1(out__: *mut *mut C_tensor, out_: *mut C_tensor, n_: i64, m_: i64);
    pub fn atg_fake_quantize_per_channel_affine(
        out__: *mut *mut C_tensor,
        self_: *mut C_tensor,
        scale_: *mut C_tensor,
        zero_point_: *mut C_tensor,
        axis_: i64,
        quant_min_: i64,
        quant_max_: i64,
    );
    pub fn atg_fake_quantize_per_channel_affine_cachemask(
        out__: *mut *mut C_tensor,
        self_: *mut C_tensor,
        scale_: *mut C_tensor,
        zero_point_: *mut C_tensor,
        axis_: i64,
        quant_min_: i64,
        quant_max_: i64,
    );
    pub fn atg_fake_quantize_per_channel_affine_cachemask_backward(
        out__: *mut *mut C_tensor,
        grad_: *mut C_tensor,
        mask_: *mut C_tensor,
    );
    pub fn atg_fake_quantize_per_tensor_affine(
        out__: *mut *mut C_tensor,
        self_: *mut C_tensor,
        scale_: f64,
        zero_point_: i64,
        quant_min_: i64,
        quant_max_: i64,
    );
    pub fn atg_fake_quantize_per_tensor_affine_cachemask(
        out__: *mut *mut C_tensor,
        self_: *mut C_tensor,
        scale_: f64,
        zero_point_: i64,
        quant_min_: i64,
        quant_max_: i64,
    );
    pub fn atg_fake_quantize_per_tensor_affine_cachemask_backward(
        out__: *mut *mut C_tensor,
        grad_: *mut C_tensor,
        mask_: *mut C_tensor,
    );
    pub fn atg_fbgemm_linear_fp16_weight(
        out__: *mut *mut C_tensor,
        input_: *mut C_tensor,
        packed_weight_: *mut C_tensor,
        bias_: *mut C_tensor,
    );
    pub fn atg_fbgemm_linear_fp16_weight_fp32_activation(
        out__: *mut *mut C_tensor,
        input_: *mut C_tensor,
        packed_weight_: *mut C_tensor,
        bias_: *mut C_tensor,
    );
    pub fn atg_fbgemm_linear_int8_weight(
        out__: *mut *mut C_tensor,
        input_: *mut C_tensor,
        weight_: *mut C_tensor,
        packed_: *mut C_tensor,
        col_offsets_: *mut C_tensor,
        weight_scale_: *mut C_scalar,
        weight_zero_point_: *mut C_scalar,
        bias_: *mut C_tensor,
    );
    pub fn atg_fbgemm_linear_int8_weight_fp32_activation(
        out__: *mut *mut C_tensor,
        input_: *mut C_tensor,
        weight_: *mut C_tensor,
        packed_: *mut C_tensor,
        col_offsets_: *mut C_tensor,
        weight_scale_: *mut C_scalar,
        weight_zero_point_: *mut C_scalar,
        bias_: *mut C_tensor,
    );
    pub fn atg_fbgemm_pack_gemm_matrix_fp16(out__: *mut *mut C_tensor, input_: *mut C_tensor);
    pub fn atg_fbgemm_pack_quantized_matrix(out__: *mut *mut C_tensor, input_: *mut C_tensor);
    pub fn atg_fbgemm_pack_quantized_matrix1(
        out__: *mut *mut C_tensor,
        input_: *mut C_tensor,
        K_: i64,
        n_: i64,
    );
    pub fn atg_feature_alpha_dropout(
        out__: *mut *mut C_tensor,
        input_: *mut C_tensor,
        p_: f64,
        train_: c_int,
    );
    pub fn atg_feature_alpha_dropout_(
        out__: *mut *mut C_tensor,
        self_: *mut C_tensor,
        p_: f64,
        train_: c_int,
    );
    pub fn atg_feature_dropout(
        out__: *mut *mut C_tensor,
        input_: *mut C_tensor,
        p_: f64,
        train_: c_int,
    );
    pub fn atg_feature_dropout_(
        out__: *mut *mut C_tensor,
        self_: *mut C_tensor,
        p_: f64,
        train_: c_int,
    );
    pub fn atg_fft_fft(
        out__: *mut *mut C_tensor,
        self_: *mut C_tensor,
        n_v: i64,
        n_null: i8,
        dim_: i64,
        norm_ptr: *const u8,
        norm_len: c_int,
    );
    pub fn atg_fft_fft2(
        out__: *mut *mut C_tensor,
        self_: *mut C_tensor,
        s_data: *const i64,
        s_len: c_int,
        dim_data: *const i64,
        dim_len: c_int,
        norm_ptr: *const u8,
        norm_len: c_int,
    );
    pub fn atg_fft_fft2_out(
        out__: *mut *mut C_tensor,
        out_: *mut C_tensor,
        self_: *mut C_tensor,
        s_data: *const i64,
        s_len: c_int,
        dim_data: *const i64,
        dim_len: c_int,
        norm_ptr: *const u8,
        norm_len: c_int,
    );
    pub fn atg_fft_fft_out(
        out__: *mut *mut C_tensor,
        out_: *mut C_tensor,
        self_: *mut C_tensor,
        n_v: i64,
        n_null: i8,
        dim_: i64,
        norm_ptr: *const u8,
        norm_len: c_int,
    );
    pub fn atg_fft_fftfreq(
        out__: *mut *mut C_tensor,
        n_: i64,
        d_: f64,
        options_kind: c_int,
        options_device: c_int,
    );
    pub fn atg_fft_fftfreq_out(out__: *mut *mut C_tensor, out_: *mut C_tensor, n_: i64, d_: f64);
    pub fn atg_fft_fftn(
        out__: *mut *mut C_tensor,
        self_: *mut C_tensor,
        s_data: *const i64,
        s_len: c_int,
        dim_data: *const i64,
        dim_len: c_int,
        norm_ptr: *const u8,
        norm_len: c_int,
    );
    pub fn atg_fft_fftn_out(
        out__: *mut *mut C_tensor,
        out_: *mut C_tensor,
        self_: *mut C_tensor,
        s_data: *const i64,
        s_len: c_int,
        dim_data: *const i64,
        dim_len: c_int,
        norm_ptr: *const u8,
        norm_len: c_int,
    );
    pub fn atg_fft_fftshift(
        out__: *mut *mut C_tensor,
        self_: *mut C_tensor,
        dim_data: *const i64,
        dim_len: c_int,
    );
    pub fn atg_fft_hfft(
        out__: *mut *mut C_tensor,
        self_: *mut C_tensor,
        n_v: i64,
        n_null: i8,
        dim_: i64,
        norm_ptr: *const u8,
        norm_len: c_int,
    );
    pub fn atg_fft_hfft_out(
        out__: *mut *mut C_tensor,
        out_: *mut C_tensor,
        self_: *mut C_tensor,
        n_v: i64,
        n_null: i8,
        dim_: i64,
        norm_ptr: *const u8,
        norm_len: c_int,
    );
    pub fn atg_fft_ifft(
        out__: *mut *mut C_tensor,
        self_: *mut C_tensor,
        n_v: i64,
        n_null: i8,
        dim_: i64,
        norm_ptr: *const u8,
        norm_len: c_int,
    );
    pub fn atg_fft_ifft2(
        out__: *mut *mut C_tensor,
        self_: *mut C_tensor,
        s_data: *const i64,
        s_len: c_int,
        dim_data: *const i64,
        dim_len: c_int,
        norm_ptr: *const u8,
        norm_len: c_int,
    );
    pub fn atg_fft_ifft2_out(
        out__: *mut *mut C_tensor,
        out_: *mut C_tensor,
        self_: *mut C_tensor,
        s_data: *const i64,
        s_len: c_int,
        dim_data: *const i64,
        dim_len: c_int,
        norm_ptr: *const u8,
        norm_len: c_int,
    );
    pub fn atg_fft_ifft_out(
        out__: *mut *mut C_tensor,
        out_: *mut C_tensor,
        self_: *mut C_tensor,
        n_v: i64,
        n_null: i8,
        dim_: i64,
        norm_ptr: *const u8,
        norm_len: c_int,
    );
    pub fn atg_fft_ifftn(
        out__: *mut *mut C_tensor,
        self_: *mut C_tensor,
        s_data: *const i64,
        s_len: c_int,
        dim_data: *const i64,
        dim_len: c_int,
        norm_ptr: *const u8,
        norm_len: c_int,
    );
    pub fn atg_fft_ifftn_out(
        out__: *mut *mut C_tensor,
        out_: *mut C_tensor,
        self_: *mut C_tensor,
        s_data: *const i64,
        s_len: c_int,
        dim_data: *const i64,
        dim_len: c_int,
        norm_ptr: *const u8,
        norm_len: c_int,
    );
    pub fn atg_fft_ifftshift(
        out__: *mut *mut C_tensor,
        self_: *mut C_tensor,
        dim_data: *const i64,
        dim_len: c_int,
    );
    pub fn atg_fft_ihfft(
        out__: *mut *mut C_tensor,
        self_: *mut C_tensor,
        n_v: i64,
        n_null: i8,
        dim_: i64,
        norm_ptr: *const u8,
        norm_len: c_int,
    );
    pub fn atg_fft_ihfft_out(
        out__: *mut *mut C_tensor,
        out_: *mut C_tensor,
        self_: *mut C_tensor,
        n_v: i64,
        n_null: i8,
        dim_: i64,
        norm_ptr: *const u8,
        norm_len: c_int,
    );
    pub fn atg_fft_irfft(
        out__: *mut *mut C_tensor,
        self_: *mut C_tensor,
        n_v: i64,
        n_null: i8,
        dim_: i64,
        norm_ptr: *const u8,
        norm_len: c_int,
    );
    pub fn atg_fft_irfft2(
        out__: *mut *mut C_tensor,
        self_: *mut C_tensor,
        s_data: *const i64,
        s_len: c_int,
        dim_data: *const i64,
        dim_len: c_int,
        norm_ptr: *const u8,
        norm_len: c_int,
    );
    pub fn atg_fft_irfft2_out(
        out__: *mut *mut C_tensor,
        out_: *mut C_tensor,
        self_: *mut C_tensor,
        s_data: *const i64,
        s_len: c_int,
        dim_data: *const i64,
        dim_len: c_int,
        norm_ptr: *const u8,
        norm_len: c_int,
    );
    pub fn atg_fft_irfft_out(
        out__: *mut *mut C_tensor,
        out_: *mut C_tensor,
        self_: *mut C_tensor,
        n_v: i64,
        n_null: i8,
        dim_: i64,
        norm_ptr: *const u8,
        norm_len: c_int,
    );
    pub fn atg_fft_irfftn(
        out__: *mut *mut C_tensor,
        self_: *mut C_tensor,
        s_data: *const i64,
        s_len: c_int,
        dim_data: *const i64,
        dim_len: c_int,
        norm_ptr: *const u8,
        norm_len: c_int,
    );
    pub fn atg_fft_irfftn_out(
        out__: *mut *mut C_tensor,
        out_: *mut C_tensor,
        self_: *mut C_tensor,
        s_data: *const i64,
        s_len: c_int,
        dim_data: *const i64,
        dim_len: c_int,
        norm_ptr: *const u8,
        norm_len: c_int,
    );
    pub fn atg_fft_rfft(
        out__: *mut *mut C_tensor,
        self_: *mut C_tensor,
        n_v: i64,
        n_null: i8,
        dim_: i64,
        norm_ptr: *const u8,
        norm_len: c_int,
    );
    pub fn atg_fft_rfft2(
        out__: *mut *mut C_tensor,
        self_: *mut C_tensor,
        s_data: *const i64,
        s_len: c_int,
        dim_data: *const i64,
        dim_len: c_int,
        norm_ptr: *const u8,
        norm_len: c_int,
    );
    pub fn atg_fft_rfft2_out(
        out__: *mut *mut C_tensor,
        out_: *mut C_tensor,
        self_: *mut C_tensor,
        s_data: *const i64,
        s_len: c_int,
        dim_data: *const i64,
        dim_len: c_int,
        norm_ptr: *const u8,
        norm_len: c_int,
    );
    pub fn atg_fft_rfft_out(
        out__: *mut *mut C_tensor,
        out_: *mut C_tensor,
        self_: *mut C_tensor,
        n_v: i64,
        n_null: i8,
        dim_: i64,
        norm_ptr: *const u8,
        norm_len: c_int,
    );
    pub fn atg_fft_rfftfreq(
        out__: *mut *mut C_tensor,
        n_: i64,
        d_: f64,
        options_kind: c_int,
        options_device: c_int,
    );
    pub fn atg_fft_rfftfreq_out(out__: *mut *mut C_tensor, out_: *mut C_tensor, n_: i64, d_: f64);
    pub fn atg_fft_rfftn(
        out__: *mut *mut C_tensor,
        self_: *mut C_tensor,
        s_data: *const i64,
        s_len: c_int,
        dim_data: *const i64,
        dim_len: c_int,
        norm_ptr: *const u8,
        norm_len: c_int,
    );
    pub fn atg_fft_rfftn_out(
        out__: *mut *mut C_tensor,
        out_: *mut C_tensor,
        self_: *mut C_tensor,
        s_data: *const i64,
        s_len: c_int,
        dim_data: *const i64,
        dim_len: c_int,
        norm_ptr: *const u8,
        norm_len: c_int,
    );
    pub fn atg_fill_(out__: *mut *mut C_tensor, self_: *mut C_tensor, value_: *mut C_scalar);
    pub fn atg_fill_1(out__: *mut *mut C_tensor, self_: *mut C_tensor, value_: *mut C_tensor);
    pub fn atg_fill_diagonal_(
        out__: *mut *mut C_tensor,
        self_: *mut C_tensor,
        fill_value_: *mut C_scalar,
        wrap_: c_int,
    );
    pub fn atg_fix(out__: *mut *mut C_tensor, self_: *mut C_tensor);
    pub fn atg_fix_(out__: *mut *mut C_tensor, self_: *mut C_tensor);
    pub fn atg_fix_out(out__: *mut *mut C_tensor, out_: *mut C_tensor, self_: *mut C_tensor);
    pub fn atg_flatten(
        out__: *mut *mut C_tensor,
        self_: *mut C_tensor,
        start_dim_: i64,
        end_dim_: i64,
    );
    pub fn atg_flip(
        out__: *mut *mut C_tensor,
        self_: *mut C_tensor,
        dims_data: *const i64,
        dims_len: c_int,
    );
    pub fn atg_fliplr(out__: *mut *mut C_tensor, self_: *mut C_tensor);
    pub fn atg_flipud(out__: *mut *mut C_tensor, self_: *mut C_tensor);
    pub fn atg_float_power(
        out__: *mut *mut C_tensor,
        self_: *mut C_tensor,
        exponent_: *mut C_tensor,
    );
    pub fn atg_float_power1(
        out__: *mut *mut C_tensor,
        self_scalar_: *mut C_scalar,
        exponent_: *mut C_tensor,
    );
    pub fn atg_float_power2(
        out__: *mut *mut C_tensor,
        self_: *mut C_tensor,
        exponent_: *mut C_scalar,
    );
    pub fn atg_float_power_(
        out__: *mut *mut C_tensor,
        self_: *mut C_tensor,
        exponent_: *mut C_scalar,
    );
    pub fn atg_float_power_1(
        out__: *mut *mut C_tensor,
        self_: *mut C_tensor,
        exponent_: *mut C_tensor,
    );
    pub fn atg_float_power_out(
        out__: *mut *mut C_tensor,
        out_: *mut C_tensor,
        self_: *mut C_tensor,
        exponent_: *mut C_tensor,
    );
    pub fn atg_float_power_out1(
        out__: *mut *mut C_tensor,
        out_: *mut C_tensor,
        self_scalar_: *mut C_scalar,
        exponent_: *mut C_tensor,
    );
    pub fn atg_float_power_out2(
        out__: *mut *mut C_tensor,
        out_: *mut C_tensor,
        self_: *mut C_tensor,
        exponent_: *mut C_scalar,
    );
    pub fn atg_floor(out__: *mut *mut C_tensor, self_: *mut C_tensor);
    pub fn atg_floor_(out__: *mut *mut C_tensor, self_: *mut C_tensor);
    pub fn atg_floor_divide(out__: *mut *mut C_tensor, self_: *mut C_tensor, other_: *mut C_tensor);
    pub fn atg_floor_divide1(
        out__: *mut *mut C_tensor,
        self_: *mut C_tensor,
        other_: *mut C_scalar,
    );
    pub fn atg_floor_divide_(
        out__: *mut *mut C_tensor,
        self_: *mut C_tensor,
        other_: *mut C_tensor,
    );
    pub fn atg_floor_divide_1(
        out__: *mut *mut C_tensor,
        self_: *mut C_tensor,
        other_: *mut C_scalar,
    );
    pub fn atg_floor_divide_out(
        out__: *mut *mut C_tensor,
        out_: *mut C_tensor,
        self_: *mut C_tensor,
        other_: *mut C_tensor,
    );
    pub fn atg_floor_out(out__: *mut *mut C_tensor, out_: *mut C_tensor, self_: *mut C_tensor);
    pub fn atg_fmax(out__: *mut *mut C_tensor, self_: *mut C_tensor, other_: *mut C_tensor);
    pub fn atg_fmax_out(
        out__: *mut *mut C_tensor,
        out_: *mut C_tensor,
        self_: *mut C_tensor,
        other_: *mut C_tensor,
    );
    pub fn atg_fmin(out__: *mut *mut C_tensor, self_: *mut C_tensor, other_: *mut C_tensor);
    pub fn atg_fmin_out(
        out__: *mut *mut C_tensor,
        out_: *mut C_tensor,
        self_: *mut C_tensor,
        other_: *mut C_tensor,
    );
    pub fn atg_fmod(out__: *mut *mut C_tensor, self_: *mut C_tensor, other_: *mut C_scalar);
    pub fn atg_fmod1(out__: *mut *mut C_tensor, self_: *mut C_tensor, other_: *mut C_tensor);
    pub fn atg_fmod_(out__: *mut *mut C_tensor, self_: *mut C_tensor, other_: *mut C_scalar);
    pub fn atg_fmod_1(out__: *mut *mut C_tensor, self_: *mut C_tensor, other_: *mut C_tensor);
    pub fn atg_fmod_out(
        out__: *mut *mut C_tensor,
        out_: *mut C_tensor,
        self_: *mut C_tensor,
        other_: *mut C_scalar,
    );
    pub fn atg_fmod_out1(
        out__: *mut *mut C_tensor,
        out_: *mut C_tensor,
        self_: *mut C_tensor,
        other_: *mut C_tensor,
    );
    pub fn atg_frac(out__: *mut *mut C_tensor, self_: *mut C_tensor);
    pub fn atg_frac_(out__: *mut *mut C_tensor, self_: *mut C_tensor);
    pub fn atg_frac_out(out__: *mut *mut C_tensor, out_: *mut C_tensor, self_: *mut C_tensor);
    pub fn atg_fractional_max_pool2d(
        out__: *mut *mut C_tensor,
        self_: *mut C_tensor,
        kernel_size_data: *const i64,
        kernel_size_len: c_int,
        output_size_data: *const i64,
        output_size_len: c_int,
        random_samples_: *mut C_tensor,
    );
    pub fn atg_fractional_max_pool2d_backward(
        out__: *mut *mut C_tensor,
        grad_output_: *mut C_tensor,
        self_: *mut C_tensor,
        kernel_size_data: *const i64,
        kernel_size_len: c_int,
        output_size_data: *const i64,
        output_size_len: c_int,
        indices_: *mut C_tensor,
    );
    pub fn atg_fractional_max_pool2d_backward_out(
        out__: *mut *mut C_tensor,
        grad_input_: *mut C_tensor,
        grad_output_: *mut C_tensor,
        self_: *mut C_tensor,
        kernel_size_data: *const i64,
        kernel_size_len: c_int,
        output_size_data: *const i64,
        output_size_len: c_int,
        indices_: *mut C_tensor,
    );
    pub fn atg_fractional_max_pool2d_out(
        out__: *mut *mut C_tensor,
        output_: *mut C_tensor,
        indices_: *mut C_tensor,
        self_: *mut C_tensor,
        kernel_size_data: *const i64,
        kernel_size_len: c_int,
        output_size_data: *const i64,
        output_size_len: c_int,
        random_samples_: *mut C_tensor,
    );
    pub fn atg_fractional_max_pool3d(
        out__: *mut *mut C_tensor,
        self_: *mut C_tensor,
        kernel_size_data: *const i64,
        kernel_size_len: c_int,
        output_size_data: *const i64,
        output_size_len: c_int,
        random_samples_: *mut C_tensor,
    );
    pub fn atg_fractional_max_pool3d_backward(
        out__: *mut *mut C_tensor,
        grad_output_: *mut C_tensor,
        self_: *mut C_tensor,
        kernel_size_data: *const i64,
        kernel_size_len: c_int,
        output_size_data: *const i64,
        output_size_len: c_int,
        indices_: *mut C_tensor,
    );
    pub fn atg_fractional_max_pool3d_backward_out(
        out__: *mut *mut C_tensor,
        grad_input_: *mut C_tensor,
        grad_output_: *mut C_tensor,
        self_: *mut C_tensor,
        kernel_size_data: *const i64,
        kernel_size_len: c_int,
        output_size_data: *const i64,
        output_size_len: c_int,
        indices_: *mut C_tensor,
    );
    pub fn atg_fractional_max_pool3d_out(
        out__: *mut *mut C_tensor,
        output_: *mut C_tensor,
        indices_: *mut C_tensor,
        self_: *mut C_tensor,
        kernel_size_data: *const i64,
        kernel_size_len: c_int,
        output_size_data: *const i64,
        output_size_len: c_int,
        random_samples_: *mut C_tensor,
    );
    pub fn atg_frobenius_norm(out__: *mut *mut C_tensor, self_: *mut C_tensor);
    pub fn atg_frobenius_norm1(
        out__: *mut *mut C_tensor,
        self_: *mut C_tensor,
        dim_data: *const i64,
        dim_len: c_int,
        keepdim_: c_int,
    );
    pub fn atg_frobenius_norm_out(
        out__: *mut *mut C_tensor,
        out_: *mut C_tensor,
        self_: *mut C_tensor,
        dim_data: *const i64,
        dim_len: c_int,
        keepdim_: c_int,
    );
    pub fn atg_from_file(
        out__: *mut *mut C_tensor,
        filename_ptr: *const u8,
        filename_len: c_int,
        shared_: c_int,
        size_v: i64,
        size_null: i8,
        options_kind: c_int,
        options_device: c_int,
    );
    pub fn atg_full(
        out__: *mut *mut C_tensor,
        size_data: *const i64,
        size_len: c_int,
        fill_value_: *mut C_scalar,
        options_kind: c_int,
        options_device: c_int,
    );
    pub fn atg_full_like(
        out__: *mut *mut C_tensor,
        self_: *mut C_tensor,
        fill_value_: *mut C_scalar,
    );
    pub fn atg_full_out(
        out__: *mut *mut C_tensor,
        out_: *mut C_tensor,
        size_data: *const i64,
        size_len: c_int,
        fill_value_: *mut C_scalar,
    );
    pub fn atg_gather(
        out__: *mut *mut C_tensor,
        self_: *mut C_tensor,
        dim_: i64,
        index_: *mut C_tensor,
        sparse_grad_: c_int,
    );
    pub fn atg_gather_backward(
        out__: *mut *mut C_tensor,
        grad_: *mut C_tensor,
        self_: *mut C_tensor,
        dim_: i64,
        index_: *mut C_tensor,
        sparse_grad_: c_int,
    );
    pub fn atg_gather_out(
        out__: *mut *mut C_tensor,
        out_: *mut C_tensor,
        self_: *mut C_tensor,
        dim_: i64,
        index_: *mut C_tensor,
        sparse_grad_: c_int,
    );
    pub fn atg_gcd(out__: *mut *mut C_tensor, self_: *mut C_tensor, other_: *mut C_tensor);
    pub fn atg_gcd_(out__: *mut *mut C_tensor, self_: *mut C_tensor, other_: *mut C_tensor);
    pub fn atg_gcd_out(
        out__: *mut *mut C_tensor,
        out_: *mut C_tensor,
        self_: *mut C_tensor,
        other_: *mut C_tensor,
    );
    pub fn atg_ge(out__: *mut *mut C_tensor, self_: *mut C_tensor, other_: *mut C_scalar);
    pub fn atg_ge1(out__: *mut *mut C_tensor, self_: *mut C_tensor, other_: *mut C_tensor);
    pub fn atg_ge_(out__: *mut *mut C_tensor, self_: *mut C_tensor, other_: *mut C_scalar);
    pub fn atg_ge_1(out__: *mut *mut C_tensor, self_: *mut C_tensor, other_: *mut C_tensor);
    pub fn atg_ge_out(
        out__: *mut *mut C_tensor,
        out_: *mut C_tensor,
        self_: *mut C_tensor,
        other_: *mut C_scalar,
    );
    pub fn atg_ge_out1(
        out__: *mut *mut C_tensor,
        out_: *mut C_tensor,
        self_: *mut C_tensor,
        other_: *mut C_tensor,
    );
    pub fn atg_gelu(out__: *mut *mut C_tensor, self_: *mut C_tensor);
    pub fn atg_gelu_backward(out__: *mut *mut C_tensor, grad_: *mut C_tensor, self_: *mut C_tensor);
    pub fn atg_geometric_(out__: *mut *mut C_tensor, self_: *mut C_tensor, p_: f64);
    pub fn atg_geqrf(out__: *mut *mut C_tensor, self_: *mut C_tensor);
    pub fn atg_geqrf_out(
        out__: *mut *mut C_tensor,
        a_: *mut C_tensor,
        tau_: *mut C_tensor,
        self_: *mut C_tensor,
    );
    pub fn atg_ger(out__: *mut *mut C_tensor, self_: *mut C_tensor, vec2_: *mut C_tensor);
    pub fn atg_ger_out(
        out__: *mut *mut C_tensor,
        out_: *mut C_tensor,
        self_: *mut C_tensor,
        vec2_: *mut C_tensor,
    );
    pub fn atg_glu(out__: *mut *mut C_tensor, self_: *mut C_tensor, dim_: i64);
    pub fn atg_glu_backward(
        out__: *mut *mut C_tensor,
        grad_output_: *mut C_tensor,
        self_: *mut C_tensor,
        dim_: i64,
    );
    pub fn atg_glu_backward_out(
        out__: *mut *mut C_tensor,
        grad_input_: *mut C_tensor,
        grad_output_: *mut C_tensor,
        self_: *mut C_tensor,
        dim_: i64,
    );
    pub fn atg_glu_out(
        out__: *mut *mut C_tensor,
        out_: *mut C_tensor,
        self_: *mut C_tensor,
        dim_: i64,
    );
    pub fn atg_grad(out__: *mut *mut C_tensor, self_: *mut C_tensor);
    pub fn atg_greater(out__: *mut *mut C_tensor, self_: *mut C_tensor, other_: *mut C_scalar);
    pub fn atg_greater1(out__: *mut *mut C_tensor, self_: *mut C_tensor, other_: *mut C_tensor);
    pub fn atg_greater_(out__: *mut *mut C_tensor, self_: *mut C_tensor, other_: *mut C_scalar);
    pub fn atg_greater_1(out__: *mut *mut C_tensor, self_: *mut C_tensor, other_: *mut C_tensor);
    pub fn atg_greater_equal(
        out__: *mut *mut C_tensor,
        self_: *mut C_tensor,
        other_: *mut C_scalar,
    );
    pub fn atg_greater_equal1(
        out__: *mut *mut C_tensor,
        self_: *mut C_tensor,
        other_: *mut C_tensor,
    );
    pub fn atg_greater_equal_(
        out__: *mut *mut C_tensor,
        self_: *mut C_tensor,
        other_: *mut C_scalar,
    );
    pub fn atg_greater_equal_1(
        out__: *mut *mut C_tensor,
        self_: *mut C_tensor,
        other_: *mut C_tensor,
    );
    pub fn atg_greater_equal_out(
        out__: *mut *mut C_tensor,
        out_: *mut C_tensor,
        self_: *mut C_tensor,
        other_: *mut C_scalar,
    );
    pub fn atg_greater_equal_out1(
        out__: *mut *mut C_tensor,
        out_: *mut C_tensor,
        self_: *mut C_tensor,
        other_: *mut C_tensor,
    );
    pub fn atg_greater_out(
        out__: *mut *mut C_tensor,
        out_: *mut C_tensor,
        self_: *mut C_tensor,
        other_: *mut C_scalar,
    );
    pub fn atg_greater_out1(
        out__: *mut *mut C_tensor,
        out_: *mut C_tensor,
        self_: *mut C_tensor,
        other_: *mut C_tensor,
    );
    pub fn atg_grid_sampler(
        out__: *mut *mut C_tensor,
        input_: *mut C_tensor,
        grid_: *mut C_tensor,
        interpolation_mode_: i64,
        padding_mode_: i64,
        align_corners_: c_int,
    );
    pub fn atg_grid_sampler_2d(
        out__: *mut *mut C_tensor,
        input_: *mut C_tensor,
        grid_: *mut C_tensor,
        interpolation_mode_: i64,
        padding_mode_: i64,
        align_corners_: c_int,
    );
    pub fn atg_grid_sampler_2d_backward(
        out__: *mut *mut C_tensor,
        grad_output_: *mut C_tensor,
        input_: *mut C_tensor,
        grid_: *mut C_tensor,
        interpolation_mode_: i64,
        padding_mode_: i64,
        align_corners_: c_int,
    );
    pub fn atg_grid_sampler_3d(
        out__: *mut *mut C_tensor,
        input_: *mut C_tensor,
        grid_: *mut C_tensor,
        interpolation_mode_: i64,
        padding_mode_: i64,
        align_corners_: c_int,
    );
    pub fn atg_grid_sampler_3d_backward(
        out__: *mut *mut C_tensor,
        grad_output_: *mut C_tensor,
        input_: *mut C_tensor,
        grid_: *mut C_tensor,
        interpolation_mode_: i64,
        padding_mode_: i64,
        align_corners_: c_int,
    );
    pub fn atg_group_norm(
        out__: *mut *mut C_tensor,
        input_: *mut C_tensor,
        num_groups_: i64,
        weight_: *mut C_tensor,
        bias_: *mut C_tensor,
        eps_: f64,
        cudnn_enabled_: c_int,
    );
    pub fn atg_gru(
        out__: *mut *mut C_tensor,
        input_: *mut C_tensor,
        hx_: *mut C_tensor,
        params_data: *const *mut C_tensor,
        params_len: c_int,
        has_biases_: c_int,
        num_layers_: i64,
        dropout_: f64,
        train_: c_int,
        bidirectional_: c_int,
        batch_first_: c_int,
    );
    pub fn atg_gru1(
        out__: *mut *mut C_tensor,
        data_: *mut C_tensor,
        batch_sizes_: *mut C_tensor,
        hx_: *mut C_tensor,
        params_data: *const *mut C_tensor,
        params_len: c_int,
        has_biases_: c_int,
        num_layers_: i64,
        dropout_: f64,
        train_: c_int,
        bidirectional_: c_int,
    );
    pub fn atg_gru_cell(
        out__: *mut *mut C_tensor,
        input_: *mut C_tensor,
        hx_: *mut C_tensor,
        w_ih_: *mut C_tensor,
        w_hh_: *mut C_tensor,
        b_ih_: *mut C_tensor,
        b_hh_: *mut C_tensor,
    );
    pub fn atg_gt(out__: *mut *mut C_tensor, self_: *mut C_tensor, other_: *mut C_scalar);
    pub fn atg_gt1(out__: *mut *mut C_tensor, self_: *mut C_tensor, other_: *mut C_tensor);
    pub fn atg_gt_(out__: *mut *mut C_tensor, self_: *mut C_tensor, other_: *mut C_scalar);
    pub fn atg_gt_1(out__: *mut *mut C_tensor, self_: *mut C_tensor, other_: *mut C_tensor);
    pub fn atg_gt_out(
        out__: *mut *mut C_tensor,
        out_: *mut C_tensor,
        self_: *mut C_tensor,
        other_: *mut C_scalar,
    );
    pub fn atg_gt_out1(
        out__: *mut *mut C_tensor,
        out_: *mut C_tensor,
        self_: *mut C_tensor,
        other_: *mut C_tensor,
    );
    pub fn atg_hamming_window(
        out__: *mut *mut C_tensor,
        window_length_: i64,
        options_kind: c_int,
        options_device: c_int,
    );
    pub fn atg_hamming_window1(
        out__: *mut *mut C_tensor,
        window_length_: i64,
        periodic_: c_int,
        options_kind: c_int,
        options_device: c_int,
    );
    pub fn atg_hamming_window2(
        out__: *mut *mut C_tensor,
        window_length_: i64,
        periodic_: c_int,
        alpha_: f64,
        options_kind: c_int,
        options_device: c_int,
    );
    pub fn atg_hamming_window3(
        out__: *mut *mut C_tensor,
        window_length_: i64,
        periodic_: c_int,
        alpha_: f64,
        beta_: f64,
        options_kind: c_int,
        options_device: c_int,
    );
    pub fn atg_hann_window(
        out__: *mut *mut C_tensor,
        window_length_: i64,
        options_kind: c_int,
        options_device: c_int,
    );
    pub fn atg_hann_window1(
        out__: *mut *mut C_tensor,
        window_length_: i64,
        periodic_: c_int,
        options_kind: c_int,
        options_device: c_int,
    );
    pub fn atg_hardshrink(out__: *mut *mut C_tensor, self_: *mut C_tensor);
    pub fn atg_hardshrink_backward(
        out__: *mut *mut C_tensor,
        grad_out_: *mut C_tensor,
        self_: *mut C_tensor,
        lambd_: *mut C_scalar,
    );
    pub fn atg_hardsigmoid(out__: *mut *mut C_tensor, self_: *mut C_tensor);
    pub fn atg_hardsigmoid_(out__: *mut *mut C_tensor, self_: *mut C_tensor);
    pub fn atg_hardsigmoid_backward(
        out__: *mut *mut C_tensor,
        grad_output_: *mut C_tensor,
        self_: *mut C_tensor,
    );
    pub fn atg_hardsigmoid_out(
        out__: *mut *mut C_tensor,
        out_: *mut C_tensor,
        self_: *mut C_tensor,
    );
    pub fn atg_hardswish(out__: *mut *mut C_tensor, self_: *mut C_tensor);
    pub fn atg_hardswish_(out__: *mut *mut C_tensor, self_: *mut C_tensor);
    pub fn atg_hardswish_backward(
        out__: *mut *mut C_tensor,
        grad_output_: *mut C_tensor,
        self_: *mut C_tensor,
    );
    pub fn atg_hardswish_out(out__: *mut *mut C_tensor, out_: *mut C_tensor, self_: *mut C_tensor);
    pub fn atg_hardtanh(out__: *mut *mut C_tensor, self_: *mut C_tensor);
    pub fn atg_hardtanh_(out__: *mut *mut C_tensor, self_: *mut C_tensor);
    pub fn atg_hardtanh_backward(
        out__: *mut *mut C_tensor,
        grad_output_: *mut C_tensor,
        self_: *mut C_tensor,
        min_val_: *mut C_scalar,
        max_val_: *mut C_scalar,
    );
    pub fn atg_hardtanh_backward_out(
        out__: *mut *mut C_tensor,
        grad_input_: *mut C_tensor,
        grad_output_: *mut C_tensor,
        self_: *mut C_tensor,
        min_val_: *mut C_scalar,
        max_val_: *mut C_scalar,
    );
    pub fn atg_hardtanh_out(out__: *mut *mut C_tensor, out_: *mut C_tensor, self_: *mut C_tensor);
    pub fn atg_heaviside(out__: *mut *mut C_tensor, self_: *mut C_tensor, values_: *mut C_tensor);
    pub fn atg_heaviside_(out__: *mut *mut C_tensor, self_: *mut C_tensor, values_: *mut C_tensor);
    pub fn atg_heaviside_out(
        out__: *mut *mut C_tensor,
        out_: *mut C_tensor,
        self_: *mut C_tensor,
        values_: *mut C_tensor,
    );
    pub fn atg_hinge_embedding_loss(
        out__: *mut *mut C_tensor,
        self_: *mut C_tensor,
        target_: *mut C_tensor,
        margin_: f64,
        reduction_: i64,
    );
    pub fn atg_histc(out__: *mut *mut C_tensor, self_: *mut C_tensor, bins_: i64);
    pub fn atg_histc_out(
        out__: *mut *mut C_tensor,
        out_: *mut C_tensor,
        self_: *mut C_tensor,
        bins_: i64,
    );
    pub fn atg_hspmm(out__: *mut *mut C_tensor, mat1_: *mut C_tensor, mat2_: *mut C_tensor);
    pub fn atg_hspmm_out(
        out__: *mut *mut C_tensor,
        out_: *mut C_tensor,
        mat1_: *mut C_tensor,
        mat2_: *mut C_tensor,
    );
    pub fn atg_hstack(
        out__: *mut *mut C_tensor,
        tensors_data: *const *mut C_tensor,
        tensors_len: c_int,
    );
    pub fn atg_hstack_out(
        out__: *mut *mut C_tensor,
        out_: *mut C_tensor,
        tensors_data: *const *mut C_tensor,
        tensors_len: c_int,
    );
    pub fn atg_hypot(out__: *mut *mut C_tensor, self_: *mut C_tensor, other_: *mut C_tensor);
    pub fn atg_hypot_(out__: *mut *mut C_tensor, self_: *mut C_tensor, other_: *mut C_tensor);
    pub fn atg_hypot_out(
        out__: *mut *mut C_tensor,
        out_: *mut C_tensor,
        self_: *mut C_tensor,
        other_: *mut C_tensor,
    );
    pub fn atg_i0(out__: *mut *mut C_tensor, self_: *mut C_tensor);
    pub fn atg_i0_(out__: *mut *mut C_tensor, self_: *mut C_tensor);
    pub fn atg_i0_out(out__: *mut *mut C_tensor, out_: *mut C_tensor, self_: *mut C_tensor);
    pub fn atg_igamma(out__: *mut *mut C_tensor, self_: *mut C_tensor, other_: *mut C_tensor);
    pub fn atg_igamma_(out__: *mut *mut C_tensor, self_: *mut C_tensor, other_: *mut C_tensor);
    pub fn atg_igamma_out(
        out__: *mut *mut C_tensor,
        out_: *mut C_tensor,
        self_: *mut C_tensor,
        other_: *mut C_tensor,
    );
    pub fn atg_igammac(out__: *mut *mut C_tensor, self_: *mut C_tensor, other_: *mut C_tensor);
    pub fn atg_igammac_(out__: *mut *mut C_tensor, self_: *mut C_tensor, other_: *mut C_tensor);
    pub fn atg_igammac_out(
        out__: *mut *mut C_tensor,
        out_: *mut C_tensor,
        self_: *mut C_tensor,
        other_: *mut C_tensor,
    );
    pub fn atg_im2col(
        out__: *mut *mut C_tensor,
        self_: *mut C_tensor,
        kernel_size_data: *const i64,
        kernel_size_len: c_int,
        dilation_data: *const i64,
        dilation_len: c_int,
        padding_data: *const i64,
        padding_len: c_int,
        stride_data: *const i64,
        stride_len: c_int,
    );
    pub fn atg_im2col_backward(
        out__: *mut *mut C_tensor,
        grad_output_: *mut C_tensor,
        input_size_data: *const i64,
        input_size_len: c_int,
        kernel_size_data: *const i64,
        kernel_size_len: c_int,
        dilation_data: *const i64,
        dilation_len: c_int,
        padding_data: *const i64,
        padding_len: c_int,
        stride_data: *const i64,
        stride_len: c_int,
    );
    pub fn atg_im2col_backward_out(
        out__: *mut *mut C_tensor,
        grad_input_: *mut C_tensor,
        grad_output_: *mut C_tensor,
        input_size_data: *const i64,
        input_size_len: c_int,
        kernel_size_data: *const i64,
        kernel_size_len: c_int,
        dilation_data: *const i64,
        dilation_len: c_int,
        padding_data: *const i64,
        padding_len: c_int,
        stride_data: *const i64,
        stride_len: c_int,
    );
    pub fn atg_im2col_out(
        out__: *mut *mut C_tensor,
        out_: *mut C_tensor,
        self_: *mut C_tensor,
        kernel_size_data: *const i64,
        kernel_size_len: c_int,
        dilation_data: *const i64,
        dilation_len: c_int,
        padding_data: *const i64,
        padding_len: c_int,
        stride_data: *const i64,
        stride_len: c_int,
    );
    pub fn atg_imag(out__: *mut *mut C_tensor, self_: *mut C_tensor);
    pub fn atg_index(
        out__: *mut *mut C_tensor,
        self_: *mut C_tensor,
        indices_data: *const *mut C_tensor,
        indices_len: c_int,
    );
    pub fn atg_index_add(
        out__: *mut *mut C_tensor,
        self_: *mut C_tensor,
        dim_: i64,
        index_: *mut C_tensor,
        source_: *mut C_tensor,
    );
    pub fn atg_index_add_(
        out__: *mut *mut C_tensor,
        self_: *mut C_tensor,
        dim_: i64,
        index_: *mut C_tensor,
        source_: *mut C_tensor,
    );
    pub fn atg_index_copy(
        out__: *mut *mut C_tensor,
        self_: *mut C_tensor,
        dim_: i64,
        index_: *mut C_tensor,
        source_: *mut C_tensor,
    );
    pub fn atg_index_copy_(
        out__: *mut *mut C_tensor,
        self_: *mut C_tensor,
        dim_: i64,
        index_: *mut C_tensor,
        source_: *mut C_tensor,
    );
    pub fn atg_index_fill(
        out__: *mut *mut C_tensor,
        self_: *mut C_tensor,
        dim_: i64,
        index_: *mut C_tensor,
        value_: *mut C_scalar,
    );
    pub fn atg_index_fill1(
        out__: *mut *mut C_tensor,
        self_: *mut C_tensor,
        dim_: i64,
        index_: *mut C_tensor,
        value_: *mut C_tensor,
    );
    pub fn atg_index_fill_(
        out__: *mut *mut C_tensor,
        self_: *mut C_tensor,
        dim_: i64,
        index_: *mut C_tensor,
        value_: *mut C_scalar,
    );
    pub fn atg_index_fill_1(
        out__: *mut *mut C_tensor,
        self_: *mut C_tensor,
        dim_: i64,
        index_: *mut C_tensor,
        value_: *mut C_tensor,
    );
    pub fn atg_index_put(
        out__: *mut *mut C_tensor,
        self_: *mut C_tensor,
        indices_data: *const *mut C_tensor,
        indices_len: c_int,
        values_: *mut C_tensor,
        accumulate_: c_int,
    );
    pub fn atg_index_put_(
        out__: *mut *mut C_tensor,
        self_: *mut C_tensor,
        indices_data: *const *mut C_tensor,
        indices_len: c_int,
        values_: *mut C_tensor,
        accumulate_: c_int,
    );
    pub fn atg_index_select(
        out__: *mut *mut C_tensor,
        self_: *mut C_tensor,
        dim_: i64,
        index_: *mut C_tensor,
    );
    pub fn atg_index_select_backward(
        out__: *mut *mut C_tensor,
        grad_: *mut C_tensor,
        self_sizes_data: *const i64,
        self_sizes_len: c_int,
        dim_: i64,
        index_: *mut C_tensor,
    );
    pub fn atg_index_select_out(
        out__: *mut *mut C_tensor,
        out_: *mut C_tensor,
        self_: *mut C_tensor,
        dim_: i64,
        index_: *mut C_tensor,
    );
    pub fn atg_indices(out__: *mut *mut C_tensor, self_: *mut C_tensor);
    pub fn atg_infinitely_differentiable_gelu_backward(
        out__: *mut *mut C_tensor,
        grad_: *mut C_tensor,
        self_: *mut C_tensor,
    );
    pub fn atg_inner(out__: *mut *mut C_tensor, self_: *mut C_tensor, other_: *mut C_tensor);
    pub fn atg_inner_out(
        out__: *mut *mut C_tensor,
        out_: *mut C_tensor,
        self_: *mut C_tensor,
        other_: *mut C_tensor,
    );
    pub fn atg_instance_norm(
        out__: *mut *mut C_tensor,
        input_: *mut C_tensor,
        weight_: *mut C_tensor,
        bias_: *mut C_tensor,
        running_mean_: *mut C_tensor,
        running_var_: *mut C_tensor,
        use_input_stats_: c_int,
        momentum_: f64,
        eps_: f64,
        cudnn_enabled_: c_int,
    );
    pub fn atg_int_repr(out__: *mut *mut C_tensor, self_: *mut C_tensor);
    pub fn atg_inverse(out__: *mut *mut C_tensor, self_: *mut C_tensor);
    pub fn atg_inverse_out(out__: *mut *mut C_tensor, out_: *mut C_tensor, self_: *mut C_tensor);
    pub fn atg_isclose(
        out__: *mut *mut C_tensor,
        self_: *mut C_tensor,
        other_: *mut C_tensor,
        rtol_: f64,
        atol_: f64,
        equal_nan_: c_int,
    );
    pub fn atg_isfinite(out__: *mut *mut C_tensor, self_: *mut C_tensor);
    pub fn atg_isinf(out__: *mut *mut C_tensor, self_: *mut C_tensor);
    pub fn atg_isnan(out__: *mut *mut C_tensor, self_: *mut C_tensor);
    pub fn atg_isneginf(out__: *mut *mut C_tensor, self_: *mut C_tensor);
    pub fn atg_isneginf_out(out__: *mut *mut C_tensor, out_: *mut C_tensor, self_: *mut C_tensor);
    pub fn atg_isposinf(out__: *mut *mut C_tensor, self_: *mut C_tensor);
    pub fn atg_isposinf_out(out__: *mut *mut C_tensor, out_: *mut C_tensor, self_: *mut C_tensor);
    pub fn atg_isreal(out__: *mut *mut C_tensor, self_: *mut C_tensor);
    pub fn atg_istft(
        out__: *mut *mut C_tensor,
        self_: *mut C_tensor,
        n_fft_: i64,
        hop_length_v: i64,
        hop_length_null: i8,
        win_length_v: i64,
        win_length_null: i8,
        window_: *mut C_tensor,
        center_: c_int,
        normalized_: c_int,
        onesided_: c_int,
        length_v: i64,
        length_null: i8,
        return_complex_: c_int,
    );
    pub fn atg_kaiser_window(
        out__: *mut *mut C_tensor,
        window_length_: i64,
        options_kind: c_int,
        options_device: c_int,
    );
    pub fn atg_kaiser_window1(
        out__: *mut *mut C_tensor,
        window_length_: i64,
        periodic_: c_int,
        options_kind: c_int,
        options_device: c_int,
    );
    pub fn atg_kaiser_window2(
        out__: *mut *mut C_tensor,
        window_length_: i64,
        periodic_: c_int,
        beta_: f64,
        options_kind: c_int,
        options_device: c_int,
    );
    pub fn atg_kl_div(
        out__: *mut *mut C_tensor,
        self_: *mut C_tensor,
        target_: *mut C_tensor,
        reduction_: i64,
        log_target_: c_int,
    );
    pub fn atg_kl_div_backward(
        out__: *mut *mut C_tensor,
        grad_output_: *mut C_tensor,
        self_: *mut C_tensor,
        target_: *mut C_tensor,
        reduction_: i64,
        log_target_: c_int,
    );
    pub fn atg_kron(out__: *mut *mut C_tensor, self_: *mut C_tensor, other_: *mut C_tensor);
    pub fn atg_kron_out(
        out__: *mut *mut C_tensor,
        out_: *mut C_tensor,
        self_: *mut C_tensor,
        other_: *mut C_tensor,
    );
    pub fn atg_kthvalue(
        out__: *mut *mut C_tensor,
        self_: *mut C_tensor,
        k_: i64,
        dim_: i64,
        keepdim_: c_int,
    );
    pub fn atg_kthvalue_out(
        out__: *mut *mut C_tensor,
        values_: *mut C_tensor,
        indices_: *mut C_tensor,
        self_: *mut C_tensor,
        k_: i64,
        dim_: i64,
        keepdim_: c_int,
    );
    pub fn atg_l1_loss(
        out__: *mut *mut C_tensor,
        self_: *mut C_tensor,
        target_: *mut C_tensor,
        reduction_: i64,
    );
    pub fn atg_l1_loss_backward(
        out__: *mut *mut C_tensor,
        grad_output_: *mut C_tensor,
        self_: *mut C_tensor,
        target_: *mut C_tensor,
        reduction_: i64,
    );
    pub fn atg_l1_loss_backward_out(
        out__: *mut *mut C_tensor,
        grad_input_: *mut C_tensor,
        grad_output_: *mut C_tensor,
        self_: *mut C_tensor,
        target_: *mut C_tensor,
        reduction_: i64,
    );
    pub fn atg_l1_loss_out(
        out__: *mut *mut C_tensor,
        out_: *mut C_tensor,
        self_: *mut C_tensor,
        target_: *mut C_tensor,
        reduction_: i64,
    );
    pub fn atg_layer_norm(
        out__: *mut *mut C_tensor,
        input_: *mut C_tensor,
        normalized_shape_data: *const i64,
        normalized_shape_len: c_int,
        weight_: *mut C_tensor,
        bias_: *mut C_tensor,
        eps_: f64,
        cudnn_enable_: c_int,
    );
    pub fn atg_lcm(out__: *mut *mut C_tensor, self_: *mut C_tensor, other_: *mut C_tensor);
    pub fn atg_lcm_(out__: *mut *mut C_tensor, self_: *mut C_tensor, other_: *mut C_tensor);
    pub fn atg_lcm_out(
        out__: *mut *mut C_tensor,
        out_: *mut C_tensor,
        self_: *mut C_tensor,
        other_: *mut C_tensor,
    );
    pub fn atg_ldexp(out__: *mut *mut C_tensor, self_: *mut C_tensor, other_: *mut C_tensor);
    pub fn atg_ldexp_(out__: *mut *mut C_tensor, self_: *mut C_tensor, other_: *mut C_tensor);
    pub fn atg_ldexp_out(
        out__: *mut *mut C_tensor,
        out_: *mut C_tensor,
        self_: *mut C_tensor,
        other_: *mut C_tensor,
    );
    pub fn atg_le(out__: *mut *mut C_tensor, self_: *mut C_tensor, other_: *mut C_scalar);
    pub fn atg_le1(out__: *mut *mut C_tensor, self_: *mut C_tensor, other_: *mut C_tensor);
    pub fn atg_le_(out__: *mut *mut C_tensor, self_: *mut C_tensor, other_: *mut C_scalar);
    pub fn atg_le_1(out__: *mut *mut C_tensor, self_: *mut C_tensor, other_: *mut C_tensor);
    pub fn atg_le_out(
        out__: *mut *mut C_tensor,
        out_: *mut C_tensor,
        self_: *mut C_tensor,
        other_: *mut C_scalar,
    );
    pub fn atg_le_out1(
        out__: *mut *mut C_tensor,
        out_: *mut C_tensor,
        self_: *mut C_tensor,
        other_: *mut C_tensor,
    );
    pub fn atg_leaky_relu(out__: *mut *mut C_tensor, self_: *mut C_tensor);
    pub fn atg_leaky_relu_(out__: *mut *mut C_tensor, self_: *mut C_tensor);
    pub fn atg_leaky_relu_backward(
        out__: *mut *mut C_tensor,
        grad_output_: *mut C_tensor,
        self_: *mut C_tensor,
        negative_slope_: *mut C_scalar,
        self_is_result_: c_int,
    );
    pub fn atg_leaky_relu_out(out__: *mut *mut C_tensor, out_: *mut C_tensor, self_: *mut C_tensor);
    pub fn atg_lerp(
        out__: *mut *mut C_tensor,
        self_: *mut C_tensor,
        end_: *mut C_tensor,
        weight_: *mut C_scalar,
    );
    pub fn atg_lerp1(
        out__: *mut *mut C_tensor,
        self_: *mut C_tensor,
        end_: *mut C_tensor,
        weight_: *mut C_tensor,
    );
    pub fn atg_lerp_(
        out__: *mut *mut C_tensor,
        self_: *mut C_tensor,
        end_: *mut C_tensor,
        weight_: *mut C_scalar,
    );
    pub fn atg_lerp_1(
        out__: *mut *mut C_tensor,
        self_: *mut C_tensor,
        end_: *mut C_tensor,
        weight_: *mut C_tensor,
    );
    pub fn atg_lerp_out(
        out__: *mut *mut C_tensor,
        out_: *mut C_tensor,
        self_: *mut C_tensor,
        end_: *mut C_tensor,
        weight_: *mut C_scalar,
    );
    pub fn atg_lerp_out1(
        out__: *mut *mut C_tensor,
        out_: *mut C_tensor,
        self_: *mut C_tensor,
        end_: *mut C_tensor,
        weight_: *mut C_tensor,
    );
    pub fn atg_less(out__: *mut *mut C_tensor, self_: *mut C_tensor, other_: *mut C_scalar);
    pub fn atg_less1(out__: *mut *mut C_tensor, self_: *mut C_tensor, other_: *mut C_tensor);
    pub fn atg_less_(out__: *mut *mut C_tensor, self_: *mut C_tensor, other_: *mut C_scalar);
    pub fn atg_less_1(out__: *mut *mut C_tensor, self_: *mut C_tensor, other_: *mut C_tensor);
    pub fn atg_less_equal(out__: *mut *mut C_tensor, self_: *mut C_tensor, other_: *mut C_scalar);
    pub fn atg_less_equal1(out__: *mut *mut C_tensor, self_: *mut C_tensor, other_: *mut C_tensor);
    pub fn atg_less_equal_(out__: *mut *mut C_tensor, self_: *mut C_tensor, other_: *mut C_scalar);
    pub fn atg_less_equal_1(out__: *mut *mut C_tensor, self_: *mut C_tensor, other_: *mut C_tensor);
    pub fn atg_less_equal_out(
        out__: *mut *mut C_tensor,
        out_: *mut C_tensor,
        self_: *mut C_tensor,
        other_: *mut C_scalar,
    );
    pub fn atg_less_equal_out1(
        out__: *mut *mut C_tensor,
        out_: *mut C_tensor,
        self_: *mut C_tensor,
        other_: *mut C_tensor,
    );
    pub fn atg_less_out(
        out__: *mut *mut C_tensor,
        out_: *mut C_tensor,
        self_: *mut C_tensor,
        other_: *mut C_scalar,
    );
    pub fn atg_less_out1(
        out__: *mut *mut C_tensor,
        out_: *mut C_tensor,
        self_: *mut C_tensor,
        other_: *mut C_tensor,
    );
    pub fn atg_lgamma(out__: *mut *mut C_tensor, self_: *mut C_tensor);
    pub fn atg_lgamma_(out__: *mut *mut C_tensor, self_: *mut C_tensor);
    pub fn atg_lgamma_out(out__: *mut *mut C_tensor, out_: *mut C_tensor, self_: *mut C_tensor);
    pub fn atg_linalg_cholesky(out__: *mut *mut C_tensor, self_: *mut C_tensor);
    pub fn atg_linalg_cholesky_out(
        out__: *mut *mut C_tensor,
        out_: *mut C_tensor,
        self_: *mut C_tensor,
    );
    pub fn atg_linalg_cond(out__: *mut *mut C_tensor, self_: *mut C_tensor, p_: *mut C_scalar);
    pub fn atg_linalg_cond1(
        out__: *mut *mut C_tensor,
        self_: *mut C_tensor,
        p_ptr: *const u8,
        p_len: c_int,
    );
    pub fn atg_linalg_cond_out(
        out__: *mut *mut C_tensor,
        out_: *mut C_tensor,
        self_: *mut C_tensor,
        p_: *mut C_scalar,
    );
    pub fn atg_linalg_cond_out1(
        out__: *mut *mut C_tensor,
        out_: *mut C_tensor,
        self_: *mut C_tensor,
        p_ptr: *const u8,
        p_len: c_int,
    );
    pub fn atg_linalg_det(out__: *mut *mut C_tensor, self_: *mut C_tensor);
    pub fn atg_linalg_eigh(
        out__: *mut *mut C_tensor,
        self_: *mut C_tensor,
        UPLO_ptr: *const u8,
        UPLO_len: c_int,
    );
    pub fn atg_linalg_eigh_out(
        out__: *mut *mut C_tensor,
        eigvals_: *mut C_tensor,
        eigvecs_: *mut C_tensor,
        self_: *mut C_tensor,
        UPLO_ptr: *const u8,
        UPLO_len: c_int,
    );
    pub fn atg_linalg_eigvalsh(
        out__: *mut *mut C_tensor,
        self_: *mut C_tensor,
        UPLO_ptr: *const u8,
        UPLO_len: c_int,
    );
    pub fn atg_linalg_eigvalsh_out(
        out__: *mut *mut C_tensor,
        out_: *mut C_tensor,
        self_: *mut C_tensor,
        UPLO_ptr: *const u8,
        UPLO_len: c_int,
    );
    pub fn atg_linalg_inv(out__: *mut *mut C_tensor, self_: *mut C_tensor);
    pub fn atg_linalg_inv_out(out__: *mut *mut C_tensor, out_: *mut C_tensor, self_: *mut C_tensor);
    pub fn atg_linalg_matrix_rank(
        out__: *mut *mut C_tensor,
        self_: *mut C_tensor,
        tol_v: f64,
        tol_null: i8,
        hermitian_: c_int,
    );
    pub fn atg_linalg_matrix_rank_out(
        out__: *mut *mut C_tensor,
        out_: *mut C_tensor,
        self_: *mut C_tensor,
        tol_v: f64,
        tol_null: i8,
        hermitian_: c_int,
    );
    pub fn atg_linalg_norm(
        out__: *mut *mut C_tensor,
        self_: *mut C_tensor,
        ord_: *mut C_scalar,
        dim_data: *const i64,
        dim_len: c_int,
        keepdim_: c_int,
        dtype_: c_int,
    );
    pub fn atg_linalg_norm1(
        out__: *mut *mut C_tensor,
        self_: *mut C_tensor,
        ord_ptr: *const u8,
        ord_len: c_int,
        dim_data: *const i64,
        dim_len: c_int,
        keepdim_: c_int,
        dtype_: c_int,
    );
    pub fn atg_linalg_norm_out(
        out__: *mut *mut C_tensor,
        out_: *mut C_tensor,
        self_: *mut C_tensor,
        ord_: *mut C_scalar,
        dim_data: *const i64,
        dim_len: c_int,
        keepdim_: c_int,
        dtype_: c_int,
    );
    pub fn atg_linalg_norm_out1(
        out__: *mut *mut C_tensor,
        out_: *mut C_tensor,
        self_: *mut C_tensor,
        ord_ptr: *const u8,
        ord_len: c_int,
        dim_data: *const i64,
        dim_len: c_int,
        keepdim_: c_int,
        dtype_: c_int,
    );
    pub fn atg_linalg_pinv(
        out__: *mut *mut C_tensor,
        self_: *mut C_tensor,
        rcond_: f64,
        hermitian_: c_int,
    );
    pub fn atg_linalg_pinv1(
        out__: *mut *mut C_tensor,
        self_: *mut C_tensor,
        rcond_: *mut C_tensor,
        hermitian_: c_int,
    );
    pub fn atg_linalg_pinv_out(
        out__: *mut *mut C_tensor,
        out_: *mut C_tensor,
        self_: *mut C_tensor,
        rcond_: f64,
        hermitian_: c_int,
    );
    pub fn atg_linalg_pinv_out1(
        out__: *mut *mut C_tensor,
        out_: *mut C_tensor,
        self_: *mut C_tensor,
        rcond_: *mut C_tensor,
        hermitian_: c_int,
    );
    pub fn atg_linalg_qr(
        out__: *mut *mut C_tensor,
        self_: *mut C_tensor,
        mode_ptr: *const u8,
        mode_len: c_int,
    );
    pub fn atg_linalg_qr_out(
        out__: *mut *mut C_tensor,
        Q_: *mut C_tensor,
        R_: *mut C_tensor,
        self_: *mut C_tensor,
        mode_ptr: *const u8,
        mode_len: c_int,
    );
    pub fn atg_linalg_slogdet(out__: *mut *mut C_tensor, self_: *mut C_tensor);
    pub fn atg_linalg_slogdet_out(
        out__: *mut *mut C_tensor,
        sign_: *mut C_tensor,
        logabsdet_: *mut C_tensor,
        self_: *mut C_tensor,
    );
    pub fn atg_linalg_solve(
        out__: *mut *mut C_tensor,
        input_: *mut C_tensor,
        other_: *mut C_tensor,
    );
    pub fn atg_linalg_solve_out(
        out__: *mut *mut C_tensor,
        out_: *mut C_tensor,
        input_: *mut C_tensor,
        other_: *mut C_tensor,
    );
    pub fn atg_linalg_svd(
        out__: *mut *mut C_tensor,
        self_: *mut C_tensor,
        full_matrices_: c_int,
        compute_uv_: c_int,
    );
    pub fn atg_linalg_svd_out(
        out__: *mut *mut C_tensor,
        U_: *mut C_tensor,
        S_: *mut C_tensor,
        V_: *mut C_tensor,
        self_: *mut C_tensor,
        full_matrices_: c_int,
        compute_uv_: c_int,
    );
    pub fn atg_linalg_tensorinv(out__: *mut *mut C_tensor, self_: *mut C_tensor, ind_: i64);
    pub fn atg_linalg_tensorinv_out(
        out__: *mut *mut C_tensor,
        out_: *mut C_tensor,
        self_: *mut C_tensor,
        ind_: i64,
    );
    pub fn atg_linalg_tensorsolve(
        out__: *mut *mut C_tensor,
        self_: *mut C_tensor,
        other_: *mut C_tensor,
        dims_data: *const i64,
        dims_len: c_int,
    );
    pub fn atg_linalg_tensorsolve_out(
        out__: *mut *mut C_tensor,
        out_: *mut C_tensor,
        self_: *mut C_tensor,
        other_: *mut C_tensor,
        dims_data: *const i64,
        dims_len: c_int,
    );
    pub fn atg_linear(
        out__: *mut *mut C_tensor,
        input_: *mut C_tensor,
        weight_: *mut C_tensor,
        bias_: *mut C_tensor,
    );
    pub fn atg_linspace(
        out__: *mut *mut C_tensor,
        start_: *mut C_scalar,
        end_: *mut C_scalar,
        steps_v: i64,
        steps_null: i8,
        options_kind: c_int,
        options_device: c_int,
    );
    pub fn atg_linspace_out(
        out__: *mut *mut C_tensor,
        out_: *mut C_tensor,
        start_: *mut C_scalar,
        end_: *mut C_scalar,
        steps_v: i64,
        steps_null: i8,
    );
    pub fn atg_log(out__: *mut *mut C_tensor, self_: *mut C_tensor);
    pub fn atg_log10(out__: *mut *mut C_tensor, self_: *mut C_tensor);
    pub fn atg_log10_(out__: *mut *mut C_tensor, self_: *mut C_tensor);
    pub fn atg_log10_out(out__: *mut *mut C_tensor, out_: *mut C_tensor, self_: *mut C_tensor);
    pub fn atg_log1p(out__: *mut *mut C_tensor, self_: *mut C_tensor);
    pub fn atg_log1p_(out__: *mut *mut C_tensor, self_: *mut C_tensor);
    pub fn atg_log1p_out(out__: *mut *mut C_tensor, out_: *mut C_tensor, self_: *mut C_tensor);
    pub fn atg_log2(out__: *mut *mut C_tensor, self_: *mut C_tensor);
    pub fn atg_log2_(out__: *mut *mut C_tensor, self_: *mut C_tensor);
    pub fn atg_log2_out(out__: *mut *mut C_tensor, out_: *mut C_tensor, self_: *mut C_tensor);
    pub fn atg_log_(out__: *mut *mut C_tensor, self_: *mut C_tensor);
    pub fn atg_log_normal_(out__: *mut *mut C_tensor, self_: *mut C_tensor, mean_: f64, std_: f64);
    pub fn atg_log_out(out__: *mut *mut C_tensor, out_: *mut C_tensor, self_: *mut C_tensor);
    pub fn atg_log_sigmoid(out__: *mut *mut C_tensor, self_: *mut C_tensor);
    pub fn atg_log_sigmoid_backward(
        out__: *mut *mut C_tensor,
        grad_output_: *mut C_tensor,
        self_: *mut C_tensor,
        buffer_: *mut C_tensor,
    );
    pub fn atg_log_sigmoid_backward_out(
        out__: *mut *mut C_tensor,
        grad_input_: *mut C_tensor,
        grad_output_: *mut C_tensor,
        self_: *mut C_tensor,
        buffer_: *mut C_tensor,
    );
    pub fn atg_log_sigmoid_out(
        out__: *mut *mut C_tensor,
        out_: *mut C_tensor,
        self_: *mut C_tensor,
    );
    pub fn atg_log_softmax(
        out__: *mut *mut C_tensor,
        self_: *mut C_tensor,
        dim_: i64,
        dtype_: c_int,
    );
    pub fn atg_logaddexp(out__: *mut *mut C_tensor, self_: *mut C_tensor, other_: *mut C_tensor);
    pub fn atg_logaddexp2(out__: *mut *mut C_tensor, self_: *mut C_tensor, other_: *mut C_tensor);
    pub fn atg_logaddexp2_out(
        out__: *mut *mut C_tensor,
        out_: *mut C_tensor,
        self_: *mut C_tensor,
        other_: *mut C_tensor,
    );
    pub fn atg_logaddexp_out(
        out__: *mut *mut C_tensor,
        out_: *mut C_tensor,
        self_: *mut C_tensor,
        other_: *mut C_tensor,
    );
    pub fn atg_logcumsumexp(out__: *mut *mut C_tensor, self_: *mut C_tensor, dim_: i64);
    pub fn atg_logcumsumexp_out(
        out__: *mut *mut C_tensor,
        out_: *mut C_tensor,
        self_: *mut C_tensor,
        dim_: i64,
    );
    pub fn atg_logdet(out__: *mut *mut C_tensor, self_: *mut C_tensor);
    pub fn atg_logical_and(out__: *mut *mut C_tensor, self_: *mut C_tensor, other_: *mut C_tensor);
    pub fn atg_logical_and_(out__: *mut *mut C_tensor, self_: *mut C_tensor, other_: *mut C_tensor);
    pub fn atg_logical_and_out(
        out__: *mut *mut C_tensor,
        out_: *mut C_tensor,
        self_: *mut C_tensor,
        other_: *mut C_tensor,
    );
    pub fn atg_logical_not(out__: *mut *mut C_tensor, self_: *mut C_tensor);
    pub fn atg_logical_not_(out__: *mut *mut C_tensor, self_: *mut C_tensor);
    pub fn atg_logical_not_out(
        out__: *mut *mut C_tensor,
        out_: *mut C_tensor,
        self_: *mut C_tensor,
    );
    pub fn atg_logical_or(out__: *mut *mut C_tensor, self_: *mut C_tensor, other_: *mut C_tensor);
    pub fn atg_logical_or_(out__: *mut *mut C_tensor, self_: *mut C_tensor, other_: *mut C_tensor);
    pub fn atg_logical_or_out(
        out__: *mut *mut C_tensor,
        out_: *mut C_tensor,
        self_: *mut C_tensor,
        other_: *mut C_tensor,
    );
    pub fn atg_logical_xor(out__: *mut *mut C_tensor, self_: *mut C_tensor, other_: *mut C_tensor);
    pub fn atg_logical_xor_(out__: *mut *mut C_tensor, self_: *mut C_tensor, other_: *mut C_tensor);
    pub fn atg_logical_xor_out(
        out__: *mut *mut C_tensor,
        out_: *mut C_tensor,
        self_: *mut C_tensor,
        other_: *mut C_tensor,
    );
    pub fn atg_logit(out__: *mut *mut C_tensor, self_: *mut C_tensor, eps_v: f64, eps_null: i8);
    pub fn atg_logit_(out__: *mut *mut C_tensor, self_: *mut C_tensor, eps_v: f64, eps_null: i8);
    pub fn atg_logit_backward(
        out__: *mut *mut C_tensor,
        grad_output_: *mut C_tensor,
        self_: *mut C_tensor,
        eps_v: f64,
        eps_null: i8,
    );
    pub fn atg_logit_backward_out(
        out__: *mut *mut C_tensor,
        grad_input_: *mut C_tensor,
        grad_output_: *mut C_tensor,
        self_: *mut C_tensor,
        eps_v: f64,
        eps_null: i8,
    );
    pub fn atg_logit_out(
        out__: *mut *mut C_tensor,
        out_: *mut C_tensor,
        self_: *mut C_tensor,
        eps_v: f64,
        eps_null: i8,
    );
    pub fn atg_logspace(
        out__: *mut *mut C_tensor,
        start_: *mut C_scalar,
        end_: *mut C_scalar,
        steps_v: i64,
        steps_null: i8,
        base_: f64,
        options_kind: c_int,
        options_device: c_int,
    );
    pub fn atg_logspace_out(
        out__: *mut *mut C_tensor,
        out_: *mut C_tensor,
        start_: *mut C_scalar,
        end_: *mut C_scalar,
        steps_v: i64,
        steps_null: i8,
        base_: f64,
    );
    pub fn atg_logsumexp(
        out__: *mut *mut C_tensor,
        self_: *mut C_tensor,
        dim_data: *const i64,
        dim_len: c_int,
        keepdim_: c_int,
    );
    pub fn atg_logsumexp_out(
        out__: *mut *mut C_tensor,
        out_: *mut C_tensor,
        self_: *mut C_tensor,
        dim_data: *const i64,
        dim_len: c_int,
        keepdim_: c_int,
    );
    pub fn atg_lstm(
        out__: *mut *mut C_tensor,
        input_: *mut C_tensor,
        hx_data: *const *mut C_tensor,
        hx_len: c_int,
        params_data: *const *mut C_tensor,
        params_len: c_int,
        has_biases_: c_int,
        num_layers_: i64,
        dropout_: f64,
        train_: c_int,
        bidirectional_: c_int,
        batch_first_: c_int,
    );
    pub fn atg_lstm1(
        out__: *mut *mut C_tensor,
        data_: *mut C_tensor,
        batch_sizes_: *mut C_tensor,
        hx_data: *const *mut C_tensor,
        hx_len: c_int,
        params_data: *const *mut C_tensor,
        params_len: c_int,
        has_biases_: c_int,
        num_layers_: i64,
        dropout_: f64,
        train_: c_int,
        bidirectional_: c_int,
    );
    pub fn atg_lstm_cell(
        out__: *mut *mut C_tensor,
        input_: *mut C_tensor,
        hx_data: *const *mut C_tensor,
        hx_len: c_int,
        w_ih_: *mut C_tensor,
        w_hh_: *mut C_tensor,
        b_ih_: *mut C_tensor,
        b_hh_: *mut C_tensor,
    );
    pub fn atg_lstsq(out__: *mut *mut C_tensor, self_: *mut C_tensor, A_: *mut C_tensor);
    pub fn atg_lstsq_out(
        out__: *mut *mut C_tensor,
        X_: *mut C_tensor,
        qr_: *mut C_tensor,
        self_: *mut C_tensor,
        A_: *mut C_tensor,
    );
    pub fn atg_lt(out__: *mut *mut C_tensor, self_: *mut C_tensor, other_: *mut C_scalar);
    pub fn atg_lt1(out__: *mut *mut C_tensor, self_: *mut C_tensor, other_: *mut C_tensor);
    pub fn atg_lt_(out__: *mut *mut C_tensor, self_: *mut C_tensor, other_: *mut C_scalar);
    pub fn atg_lt_1(out__: *mut *mut C_tensor, self_: *mut C_tensor, other_: *mut C_tensor);
    pub fn atg_lt_out(
        out__: *mut *mut C_tensor,
        out_: *mut C_tensor,
        self_: *mut C_tensor,
        other_: *mut C_scalar,
    );
    pub fn atg_lt_out1(
        out__: *mut *mut C_tensor,
        out_: *mut C_tensor,
        self_: *mut C_tensor,
        other_: *mut C_tensor,
    );
    pub fn atg_lu_solve(
        out__: *mut *mut C_tensor,
        self_: *mut C_tensor,
        LU_data_: *mut C_tensor,
        LU_pivots_: *mut C_tensor,
    );
    pub fn atg_lu_solve_out(
        out__: *mut *mut C_tensor,
        out_: *mut C_tensor,
        self_: *mut C_tensor,
        LU_data_: *mut C_tensor,
        LU_pivots_: *mut C_tensor,
    );
    pub fn atg_margin_ranking_loss(
        out__: *mut *mut C_tensor,
        input1_: *mut C_tensor,
        input2_: *mut C_tensor,
        target_: *mut C_tensor,
        margin_: f64,
        reduction_: i64,
    );
    pub fn atg_masked_fill(
        out__: *mut *mut C_tensor,
        self_: *mut C_tensor,
        mask_: *mut C_tensor,
        value_: *mut C_scalar,
    );
    pub fn atg_masked_fill1(
        out__: *mut *mut C_tensor,
        self_: *mut C_tensor,
        mask_: *mut C_tensor,
        value_: *mut C_tensor,
    );
    pub fn atg_masked_fill_(
        out__: *mut *mut C_tensor,
        self_: *mut C_tensor,
        mask_: *mut C_tensor,
        value_: *mut C_scalar,
    );
    pub fn atg_masked_fill_1(
        out__: *mut *mut C_tensor,
        self_: *mut C_tensor,
        mask_: *mut C_tensor,
        value_: *mut C_tensor,
    );
    pub fn atg_masked_scatter(
        out__: *mut *mut C_tensor,
        self_: *mut C_tensor,
        mask_: *mut C_tensor,
        source_: *mut C_tensor,
    );
    pub fn atg_masked_scatter_(
        out__: *mut *mut C_tensor,
        self_: *mut C_tensor,
        mask_: *mut C_tensor,
        source_: *mut C_tensor,
    );
    pub fn atg_masked_select(out__: *mut *mut C_tensor, self_: *mut C_tensor, mask_: *mut C_tensor);
    pub fn atg_masked_select_backward(
        out__: *mut *mut C_tensor,
        grad_: *mut C_tensor,
        input_: *mut C_tensor,
        mask_: *mut C_tensor,
    );
    pub fn atg_masked_select_out(
        out__: *mut *mut C_tensor,
        out_: *mut C_tensor,
        self_: *mut C_tensor,
        mask_: *mut C_tensor,
    );
    pub fn atg_matmul(out__: *mut *mut C_tensor, self_: *mut C_tensor, other_: *mut C_tensor);
    pub fn atg_matmul_out(
        out__: *mut *mut C_tensor,
        out_: *mut C_tensor,
        self_: *mut C_tensor,
        other_: *mut C_tensor,
    );
    pub fn atg_matrix_exp(out__: *mut *mut C_tensor, self_: *mut C_tensor);
    pub fn atg_matrix_exp_backward(
        out__: *mut *mut C_tensor,
        self_: *mut C_tensor,
        grad_: *mut C_tensor,
    );
    pub fn atg_matrix_power(out__: *mut *mut C_tensor, self_: *mut C_tensor, n_: i64);
    pub fn atg_matrix_rank(out__: *mut *mut C_tensor, self_: *mut C_tensor, symmetric_: c_int);
    pub fn atg_matrix_rank1(
        out__: *mut *mut C_tensor,
        self_: *mut C_tensor,
        tol_: f64,
        symmetric_: c_int,
    );
    pub fn atg_max(out__: *mut *mut C_tensor, self_: *mut C_tensor);
    pub fn atg_max1(out__: *mut *mut C_tensor, self_: *mut C_tensor, other_: *mut C_tensor);
    pub fn atg_max2(out__: *mut *mut C_tensor, self_: *mut C_tensor, dim_: i64, keepdim_: c_int);
    pub fn atg_max_out(
        out__: *mut *mut C_tensor,
        out_: *mut C_tensor,
        self_: *mut C_tensor,
        other_: *mut C_tensor,
    );
    pub fn atg_max_out1(
        out__: *mut *mut C_tensor,
        max_: *mut C_tensor,
        max_values_: *mut C_tensor,
        self_: *mut C_tensor,
        dim_: i64,
        keepdim_: c_int,
    );
    pub fn atg_max_pool1d(
        out__: *mut *mut C_tensor,
        self_: *mut C_tensor,
        kernel_size_data: *const i64,
        kernel_size_len: c_int,
        stride_data: *const i64,
        stride_len: c_int,
        padding_data: *const i64,
        padding_len: c_int,
        dilation_data: *const i64,
        dilation_len: c_int,
        ceil_mode_: c_int,
    );
    pub fn atg_max_pool1d_with_indices(
        out__: *mut *mut C_tensor,
        self_: *mut C_tensor,
        kernel_size_data: *const i64,
        kernel_size_len: c_int,
        stride_data: *const i64,
        stride_len: c_int,
        padding_data: *const i64,
        padding_len: c_int,
        dilation_data: *const i64,
        dilation_len: c_int,
        ceil_mode_: c_int,
    );
    pub fn atg_max_pool2d(
        out__: *mut *mut C_tensor,
        self_: *mut C_tensor,
        kernel_size_data: *const i64,
        kernel_size_len: c_int,
        stride_data: *const i64,
        stride_len: c_int,
        padding_data: *const i64,
        padding_len: c_int,
        dilation_data: *const i64,
        dilation_len: c_int,
        ceil_mode_: c_int,
    );
    pub fn atg_max_pool2d_with_indices(
        out__: *mut *mut C_tensor,
        self_: *mut C_tensor,
        kernel_size_data: *const i64,
        kernel_size_len: c_int,
        stride_data: *const i64,
        stride_len: c_int,
        padding_data: *const i64,
        padding_len: c_int,
        dilation_data: *const i64,
        dilation_len: c_int,
        ceil_mode_: c_int,
    );
    pub fn atg_max_pool2d_with_indices_backward(
        out__: *mut *mut C_tensor,
        grad_output_: *mut C_tensor,
        self_: *mut C_tensor,
        kernel_size_data: *const i64,
        kernel_size_len: c_int,
        stride_data: *const i64,
        stride_len: c_int,
        padding_data: *const i64,
        padding_len: c_int,
        dilation_data: *const i64,
        dilation_len: c_int,
        ceil_mode_: c_int,
        indices_: *mut C_tensor,
    );
    pub fn atg_max_pool2d_with_indices_backward_out(
        out__: *mut *mut C_tensor,
        grad_input_: *mut C_tensor,
        grad_output_: *mut C_tensor,
        self_: *mut C_tensor,
        kernel_size_data: *const i64,
        kernel_size_len: c_int,
        stride_data: *const i64,
        stride_len: c_int,
        padding_data: *const i64,
        padding_len: c_int,
        dilation_data: *const i64,
        dilation_len: c_int,
        ceil_mode_: c_int,
        indices_: *mut C_tensor,
    );
    pub fn atg_max_pool2d_with_indices_out(
        out__: *mut *mut C_tensor,
        out_: *mut C_tensor,
        indices_: *mut C_tensor,
        self_: *mut C_tensor,
        kernel_size_data: *const i64,
        kernel_size_len: c_int,
        stride_data: *const i64,
        stride_len: c_int,
        padding_data: *const i64,
        padding_len: c_int,
        dilation_data: *const i64,
        dilation_len: c_int,
        ceil_mode_: c_int,
    );
    pub fn atg_max_pool3d(
        out__: *mut *mut C_tensor,
        self_: *mut C_tensor,
        kernel_size_data: *const i64,
        kernel_size_len: c_int,
        stride_data: *const i64,
        stride_len: c_int,
        padding_data: *const i64,
        padding_len: c_int,
        dilation_data: *const i64,
        dilation_len: c_int,
        ceil_mode_: c_int,
    );
    pub fn atg_max_pool3d_with_indices(
        out__: *mut *mut C_tensor,
        self_: *mut C_tensor,
        kernel_size_data: *const i64,
        kernel_size_len: c_int,
        stride_data: *const i64,
        stride_len: c_int,
        padding_data: *const i64,
        padding_len: c_int,
        dilation_data: *const i64,
        dilation_len: c_int,
        ceil_mode_: c_int,
    );
    pub fn atg_max_pool3d_with_indices_backward(
        out__: *mut *mut C_tensor,
        grad_output_: *mut C_tensor,
        self_: *mut C_tensor,
        kernel_size_data: *const i64,
        kernel_size_len: c_int,
        stride_data: *const i64,
        stride_len: c_int,
        padding_data: *const i64,
        padding_len: c_int,
        dilation_data: *const i64,
        dilation_len: c_int,
        ceil_mode_: c_int,
        indices_: *mut C_tensor,
    );
    pub fn atg_max_pool3d_with_indices_backward_out(
        out__: *mut *mut C_tensor,
        grad_input_: *mut C_tensor,
        grad_output_: *mut C_tensor,
        self_: *mut C_tensor,
        kernel_size_data: *const i64,
        kernel_size_len: c_int,
        stride_data: *const i64,
        stride_len: c_int,
        padding_data: *const i64,
        padding_len: c_int,
        dilation_data: *const i64,
        dilation_len: c_int,
        ceil_mode_: c_int,
        indices_: *mut C_tensor,
    );
    pub fn atg_max_pool3d_with_indices_out(
        out__: *mut *mut C_tensor,
        out_: *mut C_tensor,
        indices_: *mut C_tensor,
        self_: *mut C_tensor,
        kernel_size_data: *const i64,
        kernel_size_len: c_int,
        stride_data: *const i64,
        stride_len: c_int,
        padding_data: *const i64,
        padding_len: c_int,
        dilation_data: *const i64,
        dilation_len: c_int,
        ceil_mode_: c_int,
    );
    pub fn atg_max_unpool2d(
        out__: *mut *mut C_tensor,
        self_: *mut C_tensor,
        indices_: *mut C_tensor,
        output_size_data: *const i64,
        output_size_len: c_int,
    );
    pub fn atg_max_unpool2d_backward(
        out__: *mut *mut C_tensor,
        grad_output_: *mut C_tensor,
        self_: *mut C_tensor,
        indices_: *mut C_tensor,
        output_size_data: *const i64,
        output_size_len: c_int,
    );
    pub fn atg_max_unpool2d_backward_out(
        out__: *mut *mut C_tensor,
        grad_input_: *mut C_tensor,
        grad_output_: *mut C_tensor,
        self_: *mut C_tensor,
        indices_: *mut C_tensor,
        output_size_data: *const i64,
        output_size_len: c_int,
    );
    pub fn atg_max_unpool2d_out(
        out__: *mut *mut C_tensor,
        out_: *mut C_tensor,
        self_: *mut C_tensor,
        indices_: *mut C_tensor,
        output_size_data: *const i64,
        output_size_len: c_int,
    );
    pub fn atg_max_unpool3d(
        out__: *mut *mut C_tensor,
        self_: *mut C_tensor,
        indices_: *mut C_tensor,
        output_size_data: *const i64,
        output_size_len: c_int,
        stride_data: *const i64,
        stride_len: c_int,
        padding_data: *const i64,
        padding_len: c_int,
    );
    pub fn atg_max_unpool3d_backward(
        out__: *mut *mut C_tensor,
        grad_output_: *mut C_tensor,
        self_: *mut C_tensor,
        indices_: *mut C_tensor,
        output_size_data: *const i64,
        output_size_len: c_int,
        stride_data: *const i64,
        stride_len: c_int,
        padding_data: *const i64,
        padding_len: c_int,
    );
    pub fn atg_max_unpool3d_backward_out(
        out__: *mut *mut C_tensor,
        grad_input_: *mut C_tensor,
        grad_output_: *mut C_tensor,
        self_: *mut C_tensor,
        indices_: *mut C_tensor,
        output_size_data: *const i64,
        output_size_len: c_int,
        stride_data: *const i64,
        stride_len: c_int,
        padding_data: *const i64,
        padding_len: c_int,
    );
    pub fn atg_max_unpool3d_out(
        out__: *mut *mut C_tensor,
        out_: *mut C_tensor,
        self_: *mut C_tensor,
        indices_: *mut C_tensor,
        output_size_data: *const i64,
        output_size_len: c_int,
        stride_data: *const i64,
        stride_len: c_int,
        padding_data: *const i64,
        padding_len: c_int,
    );
    pub fn atg_maximum(out__: *mut *mut C_tensor, self_: *mut C_tensor, other_: *mut C_tensor);
    pub fn atg_maximum_out(
        out__: *mut *mut C_tensor,
        out_: *mut C_tensor,
        self_: *mut C_tensor,
        other_: *mut C_tensor,
    );
    pub fn atg_mean(out__: *mut *mut C_tensor, self_: *mut C_tensor, dtype_: c_int);
    pub fn atg_mean1(
        out__: *mut *mut C_tensor,
        self_: *mut C_tensor,
        dim_data: *const i64,
        dim_len: c_int,
        keepdim_: c_int,
        dtype_: c_int,
    );
    pub fn atg_mean_out(
        out__: *mut *mut C_tensor,
        out_: *mut C_tensor,
        self_: *mut C_tensor,
        dim_data: *const i64,
        dim_len: c_int,
        keepdim_: c_int,
        dtype_: c_int,
    );
    pub fn atg_median(out__: *mut *mut C_tensor, self_: *mut C_tensor);
    pub fn atg_median1(out__: *mut *mut C_tensor, self_: *mut C_tensor, dim_: i64, keepdim_: c_int);
    pub fn atg_median_out(
        out__: *mut *mut C_tensor,
        values_: *mut C_tensor,
        indices_: *mut C_tensor,
        self_: *mut C_tensor,
        dim_: i64,
        keepdim_: c_int,
    );
    pub fn atg_meshgrid(
        tensors_data: *const *mut C_tensor,
        tensors_len: c_int,
    ) -> *mut *mut C_tensor;
    pub fn atg_min(out__: *mut *mut C_tensor, self_: *mut C_tensor);
    pub fn atg_min1(out__: *mut *mut C_tensor, self_: *mut C_tensor, other_: *mut C_tensor);
    pub fn atg_min2(out__: *mut *mut C_tensor, self_: *mut C_tensor, dim_: i64, keepdim_: c_int);
    pub fn atg_min_out(
        out__: *mut *mut C_tensor,
        out_: *mut C_tensor,
        self_: *mut C_tensor,
        other_: *mut C_tensor,
    );
    pub fn atg_min_out1(
        out__: *mut *mut C_tensor,
        min_: *mut C_tensor,
        min_indices_: *mut C_tensor,
        self_: *mut C_tensor,
        dim_: i64,
        keepdim_: c_int,
    );
    pub fn atg_minimum(out__: *mut *mut C_tensor, self_: *mut C_tensor, other_: *mut C_tensor);
    pub fn atg_minimum_out(
        out__: *mut *mut C_tensor,
        out_: *mut C_tensor,
        self_: *mut C_tensor,
        other_: *mut C_tensor,
    );
    pub fn atg_miopen_batch_norm(
        out__: *mut *mut C_tensor,
        input_: *mut C_tensor,
        weight_: *mut C_tensor,
        bias_: *mut C_tensor,
        running_mean_: *mut C_tensor,
        running_var_: *mut C_tensor,
        training_: c_int,
        exponential_average_factor_: f64,
        epsilon_: f64,
    );
    pub fn atg_miopen_batch_norm_backward(
        out__: *mut *mut C_tensor,
        input_: *mut C_tensor,
        grad_output_: *mut C_tensor,
        weight_: *mut C_tensor,
        running_mean_: *mut C_tensor,
        running_var_: *mut C_tensor,
        save_mean_: *mut C_tensor,
        save_var_: *mut C_tensor,
        epsilon_: f64,
    );
    pub fn atg_miopen_convolution(
        out__: *mut *mut C_tensor,
        self_: *mut C_tensor,
        weight_: *mut C_tensor,
        bias_: *mut C_tensor,
        padding_data: *const i64,
        padding_len: c_int,
        stride_data: *const i64,
        stride_len: c_int,
        dilation_data: *const i64,
        dilation_len: c_int,
        groups_: i64,
        benchmark_: c_int,
        deterministic_: c_int,
    );
    pub fn atg_miopen_convolution_backward_bias(
        out__: *mut *mut C_tensor,
        grad_output_: *mut C_tensor,
    );
    pub fn atg_miopen_convolution_backward_input(
        out__: *mut *mut C_tensor,
        self_size_data: *const i64,
        self_size_len: c_int,
        grad_output_: *mut C_tensor,
        weight_: *mut C_tensor,
        padding_data: *const i64,
        padding_len: c_int,
        stride_data: *const i64,
        stride_len: c_int,
        dilation_data: *const i64,
        dilation_len: c_int,
        groups_: i64,
        benchmark_: c_int,
        deterministic_: c_int,
    );
    pub fn atg_miopen_convolution_backward_weight(
        out__: *mut *mut C_tensor,
        weight_size_data: *const i64,
        weight_size_len: c_int,
        grad_output_: *mut C_tensor,
        self_: *mut C_tensor,
        padding_data: *const i64,
        padding_len: c_int,
        stride_data: *const i64,
        stride_len: c_int,
        dilation_data: *const i64,
        dilation_len: c_int,
        groups_: i64,
        benchmark_: c_int,
        deterministic_: c_int,
    );
    pub fn atg_miopen_convolution_transpose(
        out__: *mut *mut C_tensor,
        self_: *mut C_tensor,
        weight_: *mut C_tensor,
        bias_: *mut C_tensor,
        padding_data: *const i64,
        padding_len: c_int,
        output_padding_data: *const i64,
        output_padding_len: c_int,
        stride_data: *const i64,
        stride_len: c_int,
        dilation_data: *const i64,
        dilation_len: c_int,
        groups_: i64,
        benchmark_: c_int,
        deterministic_: c_int,
    );
    pub fn atg_miopen_convolution_transpose_backward_input(
        out__: *mut *mut C_tensor,
        grad_output_: *mut C_tensor,
        weight_: *mut C_tensor,
        padding_data: *const i64,
        padding_len: c_int,
        stride_data: *const i64,
        stride_len: c_int,
        dilation_data: *const i64,
        dilation_len: c_int,
        groups_: i64,
        benchmark_: c_int,
        deterministic_: c_int,
    );
    pub fn atg_miopen_convolution_transpose_backward_weight(
        out__: *mut *mut C_tensor,
        weight_size_data: *const i64,
        weight_size_len: c_int,
        grad_output_: *mut C_tensor,
        self_: *mut C_tensor,
        padding_data: *const i64,
        padding_len: c_int,
        stride_data: *const i64,
        stride_len: c_int,
        dilation_data: *const i64,
        dilation_len: c_int,
        groups_: i64,
        benchmark_: c_int,
        deterministic_: c_int,
    );
    pub fn atg_miopen_depthwise_convolution(
        out__: *mut *mut C_tensor,
        self_: *mut C_tensor,
        weight_: *mut C_tensor,
        bias_: *mut C_tensor,
        padding_data: *const i64,
        padding_len: c_int,
        stride_data: *const i64,
        stride_len: c_int,
        dilation_data: *const i64,
        dilation_len: c_int,
        groups_: i64,
        benchmark_: c_int,
        deterministic_: c_int,
    );
    pub fn atg_miopen_depthwise_convolution_backward_input(
        out__: *mut *mut C_tensor,
        self_size_data: *const i64,
        self_size_len: c_int,
        grad_output_: *mut C_tensor,
        weight_: *mut C_tensor,
        padding_data: *const i64,
        padding_len: c_int,
        stride_data: *const i64,
        stride_len: c_int,
        dilation_data: *const i64,
        dilation_len: c_int,
        groups_: i64,
        benchmark_: c_int,
        deterministic_: c_int,
    );
    pub fn atg_miopen_depthwise_convolution_backward_weight(
        out__: *mut *mut C_tensor,
        weight_size_data: *const i64,
        weight_size_len: c_int,
        grad_output_: *mut C_tensor,
        self_: *mut C_tensor,
        padding_data: *const i64,
        padding_len: c_int,
        stride_data: *const i64,
        stride_len: c_int,
        dilation_data: *const i64,
        dilation_len: c_int,
        groups_: i64,
        benchmark_: c_int,
        deterministic_: c_int,
    );
    pub fn atg_miopen_rnn(
        out__: *mut *mut C_tensor,
        input_: *mut C_tensor,
        weight_data: *const *mut C_tensor,
        weight_len: c_int,
        weight_stride0_: i64,
        hx_: *mut C_tensor,
        cx_: *mut C_tensor,
        mode_: i64,
        hidden_size_: i64,
        num_layers_: i64,
        batch_first_: c_int,
        dropout_: f64,
        train_: c_int,
        bidirectional_: c_int,
        batch_sizes_data: *const i64,
        batch_sizes_len: c_int,
        dropout_state_: *mut C_tensor,
    );
    pub fn atg_mkldnn_adaptive_avg_pool2d(
        out__: *mut *mut C_tensor,
        self_: *mut C_tensor,
        output_size_data: *const i64,
        output_size_len: c_int,
    );
    pub fn atg_mkldnn_convolution(
        out__: *mut *mut C_tensor,
        self_: *mut C_tensor,
        weight_: *mut C_tensor,
        bias_: *mut C_tensor,
        padding_data: *const i64,
        padding_len: c_int,
        stride_data: *const i64,
        stride_len: c_int,
        dilation_data: *const i64,
        dilation_len: c_int,
        groups_: i64,
    );
    pub fn atg_mkldnn_convolution_backward_input(
        out__: *mut *mut C_tensor,
        self_size_data: *const i64,
        self_size_len: c_int,
        grad_output_: *mut C_tensor,
        weight_: *mut C_tensor,
        padding_data: *const i64,
        padding_len: c_int,
        stride_data: *const i64,
        stride_len: c_int,
        dilation_data: *const i64,
        dilation_len: c_int,
        groups_: i64,
        bias_defined_: c_int,
    );
    pub fn atg_mkldnn_convolution_backward_weights(
        out__: *mut *mut C_tensor,
        weight_size_data: *const i64,
        weight_size_len: c_int,
        grad_output_: *mut C_tensor,
        self_: *mut C_tensor,
        padding_data: *const i64,
        padding_len: c_int,
        stride_data: *const i64,
        stride_len: c_int,
        dilation_data: *const i64,
        dilation_len: c_int,
        groups_: i64,
        bias_defined_: c_int,
    );
    pub fn atg_mkldnn_linear(
        out__: *mut *mut C_tensor,
        self_: *mut C_tensor,
        weight_: *mut C_tensor,
        bias_: *mut C_tensor,
    );
    pub fn atg_mkldnn_linear_backward_input(
        out__: *mut *mut C_tensor,
        input_size_data: *const i64,
        input_size_len: c_int,
        grad_output_: *mut C_tensor,
        weight_: *mut C_tensor,
    );
    pub fn atg_mkldnn_linear_backward_weights(
        out__: *mut *mut C_tensor,
        grad_output_: *mut C_tensor,
        input_: *mut C_tensor,
        weight_: *mut C_tensor,
        bias_defined_: c_int,
    );
    pub fn atg_mkldnn_max_pool2d(
        out__: *mut *mut C_tensor,
        self_: *mut C_tensor,
        kernel_size_data: *const i64,
        kernel_size_len: c_int,
        stride_data: *const i64,
        stride_len: c_int,
        padding_data: *const i64,
        padding_len: c_int,
        dilation_data: *const i64,
        dilation_len: c_int,
        ceil_mode_: c_int,
    );
    pub fn atg_mkldnn_max_pool3d(
        out__: *mut *mut C_tensor,
        self_: *mut C_tensor,
        kernel_size_data: *const i64,
        kernel_size_len: c_int,
        stride_data: *const i64,
        stride_len: c_int,
        padding_data: *const i64,
        padding_len: c_int,
        dilation_data: *const i64,
        dilation_len: c_int,
        ceil_mode_: c_int,
    );
    pub fn atg_mkldnn_reorder_conv2d_weight(
        out__: *mut *mut C_tensor,
        self_: *mut C_tensor,
        padding_data: *const i64,
        padding_len: c_int,
        stride_data: *const i64,
        stride_len: c_int,
        dilation_data: *const i64,
        dilation_len: c_int,
        groups_: i64,
    );
    pub fn atg_mkldnn_reorder_conv3d_weight(
        out__: *mut *mut C_tensor,
        self_: *mut C_tensor,
        padding_data: *const i64,
        padding_len: c_int,
        stride_data: *const i64,
        stride_len: c_int,
        dilation_data: *const i64,
        dilation_len: c_int,
        groups_: i64,
    );
    pub fn atg_mm(out__: *mut *mut C_tensor, self_: *mut C_tensor, mat2_: *mut C_tensor);
    pub fn atg_mm_out(
        out__: *mut *mut C_tensor,
        out_: *mut C_tensor,
        self_: *mut C_tensor,
        mat2_: *mut C_tensor,
    );
    pub fn atg_mode(out__: *mut *mut C_tensor, self_: *mut C_tensor, dim_: i64, keepdim_: c_int);
    pub fn atg_mode_out(
        out__: *mut *mut C_tensor,
        values_: *mut C_tensor,
        indices_: *mut C_tensor,
        self_: *mut C_tensor,
        dim_: i64,
        keepdim_: c_int,
    );
    pub fn atg_moveaxis(
        out__: *mut *mut C_tensor,
        self_: *mut C_tensor,
        source_data: *const i64,
        source_len: c_int,
        destination_data: *const i64,
        destination_len: c_int,
    );
    pub fn atg_moveaxis1(
        out__: *mut *mut C_tensor,
        self_: *mut C_tensor,
        source_: i64,
        destination_: i64,
    );
    pub fn atg_movedim(
        out__: *mut *mut C_tensor,
        self_: *mut C_tensor,
        source_data: *const i64,
        source_len: c_int,
        destination_data: *const i64,
        destination_len: c_int,
    );
    pub fn atg_movedim1(
        out__: *mut *mut C_tensor,
        self_: *mut C_tensor,
        source_: i64,
        destination_: i64,
    );
    pub fn atg_mse_loss(
        out__: *mut *mut C_tensor,
        self_: *mut C_tensor,
        target_: *mut C_tensor,
        reduction_: i64,
    );
    pub fn atg_mse_loss_backward(
        out__: *mut *mut C_tensor,
        grad_output_: *mut C_tensor,
        self_: *mut C_tensor,
        target_: *mut C_tensor,
        reduction_: i64,
    );
    pub fn atg_mse_loss_backward_out(
        out__: *mut *mut C_tensor,
        grad_input_: *mut C_tensor,
        grad_output_: *mut C_tensor,
        self_: *mut C_tensor,
        target_: *mut C_tensor,
        reduction_: i64,
    );
    pub fn atg_mse_loss_out(
        out__: *mut *mut C_tensor,
        out_: *mut C_tensor,
        self_: *mut C_tensor,
        target_: *mut C_tensor,
        reduction_: i64,
    );
    pub fn atg_msort(out__: *mut *mut C_tensor, self_: *mut C_tensor);
    pub fn atg_msort_out(out__: *mut *mut C_tensor, out_: *mut C_tensor, self_: *mut C_tensor);
    pub fn atg_mul(out__: *mut *mut C_tensor, self_: *mut C_tensor, other_: *mut C_tensor);
    pub fn atg_mul1(out__: *mut *mut C_tensor, self_: *mut C_tensor, other_: *mut C_scalar);
    pub fn atg_mul_(out__: *mut *mut C_tensor, self_: *mut C_tensor, other_: *mut C_tensor);
    pub fn atg_mul_1(out__: *mut *mut C_tensor, self_: *mut C_tensor, other_: *mut C_scalar);
    pub fn atg_mul_out(
        out__: *mut *mut C_tensor,
        out_: *mut C_tensor,
        self_: *mut C_tensor,
        other_: *mut C_tensor,
    );
    pub fn atg_multi_margin_loss_backward(
        out__: *mut *mut C_tensor,
        grad_output_: *mut C_tensor,
        self_: *mut C_tensor,
        target_: *mut C_tensor,
        p_: *mut C_scalar,
        margin_: *mut C_scalar,
        weight_: *mut C_tensor,
        reduction_: i64,
    );
    pub fn atg_multi_margin_loss_backward_out(
        out__: *mut *mut C_tensor,
        grad_input_: *mut C_tensor,
        grad_output_: *mut C_tensor,
        self_: *mut C_tensor,
        target_: *mut C_tensor,
        p_: *mut C_scalar,
        margin_: *mut C_scalar,
        weight_: *mut C_tensor,
        reduction_: i64,
    );
    pub fn atg_multilabel_margin_loss(
        out__: *mut *mut C_tensor,
        self_: *mut C_tensor,
        target_: *mut C_tensor,
        reduction_: i64,
    );
    pub fn atg_multilabel_margin_loss_backward(
        out__: *mut *mut C_tensor,
        grad_output_: *mut C_tensor,
        self_: *mut C_tensor,
        target_: *mut C_tensor,
        reduction_: i64,
        is_target_: *mut C_tensor,
    );
    pub fn atg_multilabel_margin_loss_backward_out(
        out__: *mut *mut C_tensor,
        grad_input_: *mut C_tensor,
        grad_output_: *mut C_tensor,
        self_: *mut C_tensor,
        target_: *mut C_tensor,
        reduction_: i64,
        is_target_: *mut C_tensor,
    );
    pub fn atg_multilabel_margin_loss_out(
        out__: *mut *mut C_tensor,
        out_: *mut C_tensor,
        self_: *mut C_tensor,
        target_: *mut C_tensor,
        reduction_: i64,
    );
    pub fn atg_multinomial(
        out__: *mut *mut C_tensor,
        self_: *mut C_tensor,
        num_samples_: i64,
        replacement_: c_int,
    );
    pub fn atg_multinomial_out(
        out__: *mut *mut C_tensor,
        out_: *mut C_tensor,
        self_: *mut C_tensor,
        num_samples_: i64,
        replacement_: c_int,
    );
    pub fn atg_multiply(out__: *mut *mut C_tensor, self_: *mut C_tensor, other_: *mut C_tensor);
    pub fn atg_multiply1(out__: *mut *mut C_tensor, self_: *mut C_tensor, other_: *mut C_scalar);
    pub fn atg_multiply_(out__: *mut *mut C_tensor, self_: *mut C_tensor, other_: *mut C_tensor);
    pub fn atg_multiply_1(out__: *mut *mut C_tensor, self_: *mut C_tensor, other_: *mut C_scalar);
    pub fn atg_multiply_out(
        out__: *mut *mut C_tensor,
        out_: *mut C_tensor,
        self_: *mut C_tensor,
        other_: *mut C_tensor,
    );
    pub fn atg_mv(out__: *mut *mut C_tensor, self_: *mut C_tensor, vec_: *mut C_tensor);
    pub fn atg_mv_out(
        out__: *mut *mut C_tensor,
        out_: *mut C_tensor,
        self_: *mut C_tensor,
        vec_: *mut C_tensor,
    );
    pub fn atg_mvlgamma(out__: *mut *mut C_tensor, self_: *mut C_tensor, p_: i64);
    pub fn atg_mvlgamma_(out__: *mut *mut C_tensor, self_: *mut C_tensor, p_: i64);
    pub fn atg_nan_to_num(
        out__: *mut *mut C_tensor,
        self_: *mut C_tensor,
        nan_v: f64,
        nan_null: i8,
        posinf_v: f64,
        posinf_null: i8,
        neginf_v: f64,
        neginf_null: i8,
    );
    pub fn atg_nan_to_num_(
        out__: *mut *mut C_tensor,
        self_: *mut C_tensor,
        nan_v: f64,
        nan_null: i8,
        posinf_v: f64,
        posinf_null: i8,
        neginf_v: f64,
        neginf_null: i8,
    );
    pub fn atg_nan_to_num_out(
        out__: *mut *mut C_tensor,
        out_: *mut C_tensor,
        self_: *mut C_tensor,
        nan_v: f64,
        nan_null: i8,
        posinf_v: f64,
        posinf_null: i8,
        neginf_v: f64,
        neginf_null: i8,
    );
    pub fn atg_nanmedian(out__: *mut *mut C_tensor, self_: *mut C_tensor);
    pub fn atg_nanmedian1(
        out__: *mut *mut C_tensor,
        self_: *mut C_tensor,
        dim_: i64,
        keepdim_: c_int,
    );
    pub fn atg_nanmedian_out(
        out__: *mut *mut C_tensor,
        values_: *mut C_tensor,
        indices_: *mut C_tensor,
        self_: *mut C_tensor,
        dim_: i64,
        keepdim_: c_int,
    );
    pub fn atg_nanquantile(
        out__: *mut *mut C_tensor,
        self_: *mut C_tensor,
        q_: f64,
        dim_v: i64,
        dim_null: i8,
        keepdim_: c_int,
    );
    pub fn atg_nanquantile1(
        out__: *mut *mut C_tensor,
        self_: *mut C_tensor,
        q_: *mut C_tensor,
        dim_v: i64,
        dim_null: i8,
        keepdim_: c_int,
    );
    pub fn atg_nanquantile_out(
        out__: *mut *mut C_tensor,
        out_: *mut C_tensor,
        self_: *mut C_tensor,
        q_: f64,
        dim_v: i64,
        dim_null: i8,
        keepdim_: c_int,
    );
    pub fn atg_nanquantile_out1(
        out__: *mut *mut C_tensor,
        out_: *mut C_tensor,
        self_: *mut C_tensor,
        q_: *mut C_tensor,
        dim_v: i64,
        dim_null: i8,
        keepdim_: c_int,
    );
    pub fn atg_nansum(out__: *mut *mut C_tensor, self_: *mut C_tensor, dtype_: c_int);
    pub fn atg_nansum1(
        out__: *mut *mut C_tensor,
        self_: *mut C_tensor,
        dim_data: *const i64,
        dim_len: c_int,
        keepdim_: c_int,
        dtype_: c_int,
    );
    pub fn atg_nansum_out(
        out__: *mut *mut C_tensor,
        out_: *mut C_tensor,
        self_: *mut C_tensor,
        dim_data: *const i64,
        dim_len: c_int,
        keepdim_: c_int,
        dtype_: c_int,
    );
    pub fn atg_narrow(
        out__: *mut *mut C_tensor,
        self_: *mut C_tensor,
        dim_: i64,
        start_: i64,
        length_: i64,
    );
    pub fn atg_narrow1(
        out__: *mut *mut C_tensor,
        self_: *mut C_tensor,
        dim_: i64,
        start_: *mut C_tensor,
        length_: i64,
    );
    pub fn atg_narrow_copy(
        out__: *mut *mut C_tensor,
        self_: *mut C_tensor,
        dim_: i64,
        start_: i64,
        length_: i64,
    );
    pub fn atg_narrow_copy_out(
        out__: *mut *mut C_tensor,
        out_: *mut C_tensor,
        self_: *mut C_tensor,
        dim_: i64,
        start_: i64,
        length_: i64,
    );
    pub fn atg_native_batch_norm(
        out__: *mut *mut C_tensor,
        input_: *mut C_tensor,
        weight_: *mut C_tensor,
        bias_: *mut C_tensor,
        running_mean_: *mut C_tensor,
        running_var_: *mut C_tensor,
        training_: c_int,
        momentum_: f64,
        eps_: f64,
    );
    pub fn atg_native_batch_norm_out(
        out__: *mut *mut C_tensor,
        out_: *mut C_tensor,
        save_mean_: *mut C_tensor,
        save_invstd_: *mut C_tensor,
        input_: *mut C_tensor,
        weight_: *mut C_tensor,
        bias_: *mut C_tensor,
        running_mean_: *mut C_tensor,
        running_var_: *mut C_tensor,
        training_: c_int,
        momentum_: f64,
        eps_: f64,
    );
    pub fn atg_native_group_norm(
        out__: *mut *mut C_tensor,
        input_: *mut C_tensor,
        weight_: *mut C_tensor,
        bias_: *mut C_tensor,
        n_: i64,
        C_: i64,
        HxW_: i64,
        group_: i64,
        eps_: f64,
    );
    pub fn atg_native_layer_norm(
        out__: *mut *mut C_tensor,
        input_: *mut C_tensor,
        normalized_shape_data: *const i64,
        normalized_shape_len: c_int,
        weight_: *mut C_tensor,
        bias_: *mut C_tensor,
        eps_: f64,
    );
    pub fn atg_native_norm(out__: *mut *mut C_tensor, self_: *mut C_tensor);
    pub fn atg_native_norm1(
        out__: *mut *mut C_tensor,
        self_: *mut C_tensor,
        p_: *mut C_scalar,
        dim_data: *const i64,
        dim_len: c_int,
        keepdim_: c_int,
        dtype_: c_int,
    );
    pub fn atg_ne(out__: *mut *mut C_tensor, self_: *mut C_tensor, other_: *mut C_scalar);
    pub fn atg_ne1(out__: *mut *mut C_tensor, self_: *mut C_tensor, other_: *mut C_tensor);
    pub fn atg_ne_(out__: *mut *mut C_tensor, self_: *mut C_tensor, other_: *mut C_scalar);
    pub fn atg_ne_1(out__: *mut *mut C_tensor, self_: *mut C_tensor, other_: *mut C_tensor);
    pub fn atg_ne_out(
        out__: *mut *mut C_tensor,
        out_: *mut C_tensor,
        self_: *mut C_tensor,
        other_: *mut C_scalar,
    );
    pub fn atg_ne_out1(
        out__: *mut *mut C_tensor,
        out_: *mut C_tensor,
        self_: *mut C_tensor,
        other_: *mut C_tensor,
    );
    pub fn atg_neg(out__: *mut *mut C_tensor, self_: *mut C_tensor);
    pub fn atg_neg_(out__: *mut *mut C_tensor, self_: *mut C_tensor);
    pub fn atg_neg_out(out__: *mut *mut C_tensor, out_: *mut C_tensor, self_: *mut C_tensor);
    pub fn atg_negative(out__: *mut *mut C_tensor, self_: *mut C_tensor);
    pub fn atg_negative_(out__: *mut *mut C_tensor, self_: *mut C_tensor);
    pub fn atg_negative_out(out__: *mut *mut C_tensor, out_: *mut C_tensor, self_: *mut C_tensor);
    pub fn atg_new_empty(
        out__: *mut *mut C_tensor,
        self_: *mut C_tensor,
        size_data: *const i64,
        size_len: c_int,
        options_kind: c_int,
        options_device: c_int,
    );
    pub fn atg_new_empty_strided(
        out__: *mut *mut C_tensor,
        self_: *mut C_tensor,
        size_data: *const i64,
        size_len: c_int,
        stride_data: *const i64,
        stride_len: c_int,
        options_kind: c_int,
        options_device: c_int,
    );
    pub fn atg_new_full(
        out__: *mut *mut C_tensor,
        self_: *mut C_tensor,
        size_data: *const i64,
        size_len: c_int,
        fill_value_: *mut C_scalar,
        options_kind: c_int,
        options_device: c_int,
    );
    pub fn atg_new_zeros(
        out__: *mut *mut C_tensor,
        self_: *mut C_tensor,
        size_data: *const i64,
        size_len: c_int,
        options_kind: c_int,
        options_device: c_int,
    );
    pub fn atg_nextafter(out__: *mut *mut C_tensor, self_: *mut C_tensor, other_: *mut C_tensor);
    pub fn atg_nextafter_(out__: *mut *mut C_tensor, self_: *mut C_tensor, other_: *mut C_tensor);
    pub fn atg_nextafter_out(
        out__: *mut *mut C_tensor,
        out_: *mut C_tensor,
        self_: *mut C_tensor,
        other_: *mut C_tensor,
    );
    pub fn atg_nll_loss(
        out__: *mut *mut C_tensor,
        self_: *mut C_tensor,
        target_: *mut C_tensor,
        weight_: *mut C_tensor,
        reduction_: i64,
        ignore_index_: i64,
    );
    pub fn atg_nll_loss2d(
        out__: *mut *mut C_tensor,
        self_: *mut C_tensor,
        target_: *mut C_tensor,
        weight_: *mut C_tensor,
        reduction_: i64,
        ignore_index_: i64,
    );
    pub fn atg_nll_loss2d_backward(
        out__: *mut *mut C_tensor,
        grad_output_: *mut C_tensor,
        self_: *mut C_tensor,
        target_: *mut C_tensor,
        weight_: *mut C_tensor,
        reduction_: i64,
        ignore_index_: i64,
        total_weight_: *mut C_tensor,
    );
    pub fn atg_nll_loss2d_backward_out(
        out__: *mut *mut C_tensor,
        grad_input_: *mut C_tensor,
        grad_output_: *mut C_tensor,
        self_: *mut C_tensor,
        target_: *mut C_tensor,
        weight_: *mut C_tensor,
        reduction_: i64,
        ignore_index_: i64,
        total_weight_: *mut C_tensor,
    );
    pub fn atg_nll_loss2d_out(
        out__: *mut *mut C_tensor,
        out_: *mut C_tensor,
        self_: *mut C_tensor,
        target_: *mut C_tensor,
        weight_: *mut C_tensor,
        reduction_: i64,
        ignore_index_: i64,
    );
    pub fn atg_nll_loss_backward(
        out__: *mut *mut C_tensor,
        grad_output_: *mut C_tensor,
        self_: *mut C_tensor,
        target_: *mut C_tensor,
        weight_: *mut C_tensor,
        reduction_: i64,
        ignore_index_: i64,
        total_weight_: *mut C_tensor,
    );
    pub fn atg_nll_loss_backward_out(
        out__: *mut *mut C_tensor,
        grad_input_: *mut C_tensor,
        grad_output_: *mut C_tensor,
        self_: *mut C_tensor,
        target_: *mut C_tensor,
        weight_: *mut C_tensor,
        reduction_: i64,
        ignore_index_: i64,
        total_weight_: *mut C_tensor,
    );
    pub fn atg_nll_loss_out(
        out__: *mut *mut C_tensor,
        out_: *mut C_tensor,
        self_: *mut C_tensor,
        target_: *mut C_tensor,
        weight_: *mut C_tensor,
        reduction_: i64,
        ignore_index_: i64,
    );
    pub fn atg_nonzero(out__: *mut *mut C_tensor, self_: *mut C_tensor);
    pub fn atg_nonzero_numpy(self_: *mut C_tensor) -> *mut *mut C_tensor;
    pub fn atg_nonzero_out(out__: *mut *mut C_tensor, out_: *mut C_tensor, self_: *mut C_tensor);
    pub fn atg_norm(out__: *mut *mut C_tensor, self_: *mut C_tensor);
    pub fn atg_norm1(
        out__: *mut *mut C_tensor,
        self_: *mut C_tensor,
        p_: *mut C_scalar,
        dtype_: c_int,
    );
    pub fn atg_norm2(
        out__: *mut *mut C_tensor,
        self_: *mut C_tensor,
        p_: *mut C_scalar,
        dim_data: *const i64,
        dim_len: c_int,
        keepdim_: c_int,
    );
    pub fn atg_norm3(
        out__: *mut *mut C_tensor,
        self_: *mut C_tensor,
        p_: *mut C_scalar,
        dim_data: *const i64,
        dim_len: c_int,
        keepdim_: c_int,
        dtype_: c_int,
    );
    pub fn atg_norm_except_dim(out__: *mut *mut C_tensor, v_: *mut C_tensor, pow_: i64, dim_: i64);
    pub fn atg_norm_out(
        out__: *mut *mut C_tensor,
        out_: *mut C_tensor,
        self_: *mut C_tensor,
        p_: *mut C_scalar,
        dim_data: *const i64,
        dim_len: c_int,
        keepdim_: c_int,
    );
    pub fn atg_norm_out1(
        out__: *mut *mut C_tensor,
        out_: *mut C_tensor,
        self_: *mut C_tensor,
        p_: *mut C_scalar,
        dim_data: *const i64,
        dim_len: c_int,
        keepdim_: c_int,
        dtype_: c_int,
    );
    pub fn atg_normal_(out__: *mut *mut C_tensor, self_: *mut C_tensor, mean_: f64, std_: f64);
    pub fn atg_normal_out(
        out__: *mut *mut C_tensor,
        out_: *mut C_tensor,
        mean_: *mut C_tensor,
        std_: f64,
    );
    pub fn atg_normal_out1(
        out__: *mut *mut C_tensor,
        out_: *mut C_tensor,
        mean_: f64,
        std_: *mut C_tensor,
    );
    pub fn atg_normal_out2(
        out__: *mut *mut C_tensor,
        out_: *mut C_tensor,
        mean_: *mut C_tensor,
        std_: *mut C_tensor,
    );
    pub fn atg_normal_out3(
        out__: *mut *mut C_tensor,
        out_: *mut C_tensor,
        mean_: f64,
        std_: f64,
        size_data: *const i64,
        size_len: c_int,
    );
    pub fn atg_not_equal(out__: *mut *mut C_tensor, self_: *mut C_tensor, other_: *mut C_scalar);
    pub fn atg_not_equal1(out__: *mut *mut C_tensor, self_: *mut C_tensor, other_: *mut C_tensor);
    pub fn atg_not_equal_(out__: *mut *mut C_tensor, self_: *mut C_tensor, other_: *mut C_scalar);
    pub fn atg_not_equal_1(out__: *mut *mut C_tensor, self_: *mut C_tensor, other_: *mut C_tensor);
    pub fn atg_not_equal_out(
        out__: *mut *mut C_tensor,
        out_: *mut C_tensor,
        self_: *mut C_tensor,
        other_: *mut C_scalar,
    );
    pub fn atg_not_equal_out1(
        out__: *mut *mut C_tensor,
        out_: *mut C_tensor,
        self_: *mut C_tensor,
        other_: *mut C_tensor,
    );
    pub fn atg_nuclear_norm(out__: *mut *mut C_tensor, self_: *mut C_tensor, keepdim_: c_int);
    pub fn atg_nuclear_norm1(
        out__: *mut *mut C_tensor,
        self_: *mut C_tensor,
        dim_data: *const i64,
        dim_len: c_int,
        keepdim_: c_int,
    );
    pub fn atg_nuclear_norm_out(
        out__: *mut *mut C_tensor,
        out_: *mut C_tensor,
        self_: *mut C_tensor,
        keepdim_: c_int,
    );
    pub fn atg_nuclear_norm_out1(
        out__: *mut *mut C_tensor,
        out_: *mut C_tensor,
        self_: *mut C_tensor,
        dim_data: *const i64,
        dim_len: c_int,
        keepdim_: c_int,
    );
    pub fn atg_numpy_t(out__: *mut *mut C_tensor, self_: *mut C_tensor);
    pub fn atg_one_hot(out__: *mut *mut C_tensor, self_: *mut C_tensor, num_classes_: i64);
    pub fn atg_ones(
        out__: *mut *mut C_tensor,
        size_data: *const i64,
        size_len: c_int,
        options_kind: c_int,
        options_device: c_int,
    );
    pub fn atg_ones_like(out__: *mut *mut C_tensor, self_: *mut C_tensor);
    pub fn atg_ones_out(
        out__: *mut *mut C_tensor,
        out_: *mut C_tensor,
        size_data: *const i64,
        size_len: c_int,
    );
    pub fn atg_orgqr(out__: *mut *mut C_tensor, self_: *mut C_tensor, input2_: *mut C_tensor);
    pub fn atg_orgqr_out(
        out__: *mut *mut C_tensor,
        out_: *mut C_tensor,
        self_: *mut C_tensor,
        input2_: *mut C_tensor,
    );
    pub fn atg_ormqr(
        out__: *mut *mut C_tensor,
        self_: *mut C_tensor,
        input2_: *mut C_tensor,
        input3_: *mut C_tensor,
        left_: c_int,
        transpose_: c_int,
    );
    pub fn atg_ormqr_out(
        out__: *mut *mut C_tensor,
        out_: *mut C_tensor,
        self_: *mut C_tensor,
        input2_: *mut C_tensor,
        input3_: *mut C_tensor,
        left_: c_int,
        transpose_: c_int,
    );
    pub fn atg_outer(out__: *mut *mut C_tensor, self_: *mut C_tensor, vec2_: *mut C_tensor);
    pub fn atg_outer_out(
        out__: *mut *mut C_tensor,
        out_: *mut C_tensor,
        self_: *mut C_tensor,
        vec2_: *mut C_tensor,
    );
    pub fn atg_pairwise_distance(
        out__: *mut *mut C_tensor,
        x1_: *mut C_tensor,
        x2_: *mut C_tensor,
        p_: f64,
        eps_: f64,
        keepdim_: c_int,
    );
    pub fn atg_pdist(out__: *mut *mut C_tensor, self_: *mut C_tensor, p_: f64);
    pub fn atg_permute(
        out__: *mut *mut C_tensor,
        self_: *mut C_tensor,
        dims_data: *const i64,
        dims_len: c_int,
    );
    pub fn atg_pin_memory(out__: *mut *mut C_tensor, self_: *mut C_tensor);
    pub fn atg_pinverse(out__: *mut *mut C_tensor, self_: *mut C_tensor, rcond_: f64);
    pub fn atg_pixel_shuffle(out__: *mut *mut C_tensor, self_: *mut C_tensor, upscale_factor_: i64);
    pub fn atg_pixel_unshuffle(
        out__: *mut *mut C_tensor,
        self_: *mut C_tensor,
        downscale_factor_: i64,
    );
    pub fn atg_poisson(out__: *mut *mut C_tensor, self_: *mut C_tensor);
    pub fn atg_poisson_nll_loss(
        out__: *mut *mut C_tensor,
        input_: *mut C_tensor,
        target_: *mut C_tensor,
        log_input_: c_int,
        full_: c_int,
        eps_: f64,
        reduction_: i64,
    );
    pub fn atg_polar(out__: *mut *mut C_tensor, abs_: *mut C_tensor, angle_: *mut C_tensor);
    pub fn atg_polar_out(
        out__: *mut *mut C_tensor,
        out_: *mut C_tensor,
        abs_: *mut C_tensor,
        angle_: *mut C_tensor,
    );
    pub fn atg_polygamma(out__: *mut *mut C_tensor, n_: i64, self_: *mut C_tensor);
    pub fn atg_polygamma_(out__: *mut *mut C_tensor, self_: *mut C_tensor, n_: i64);
    pub fn atg_polygamma_out(
        out__: *mut *mut C_tensor,
        out_: *mut C_tensor,
        n_: i64,
        self_: *mut C_tensor,
    );
    pub fn atg_pow(out__: *mut *mut C_tensor, self_: *mut C_tensor, exponent_: *mut C_scalar);
    pub fn atg_pow1(out__: *mut *mut C_tensor, self_: *mut C_tensor, exponent_: *mut C_tensor);
    pub fn atg_pow2(
        out__: *mut *mut C_tensor,
        self_scalar_: *mut C_scalar,
        exponent_: *mut C_tensor,
    );
    pub fn atg_pow_(out__: *mut *mut C_tensor, self_: *mut C_tensor, exponent_: *mut C_scalar);
    pub fn atg_pow_1(out__: *mut *mut C_tensor, self_: *mut C_tensor, exponent_: *mut C_tensor);
    pub fn atg_pow_out(
        out__: *mut *mut C_tensor,
        out_: *mut C_tensor,
        self_: *mut C_tensor,
        exponent_: *mut C_tensor,
    );
    pub fn atg_pow_out1(
        out__: *mut *mut C_tensor,
        out_: *mut C_tensor,
        self_scalar_: *mut C_scalar,
        exponent_: *mut C_tensor,
    );
    pub fn atg_pow_out2(
        out__: *mut *mut C_tensor,
        out_: *mut C_tensor,
        self_: *mut C_tensor,
        exponent_: *mut C_scalar,
    );
    pub fn atg_prelu(out__: *mut *mut C_tensor, self_: *mut C_tensor, weight_: *mut C_tensor);
    pub fn atg_prelu_backward(
        out__: *mut *mut C_tensor,
        grad_output_: *mut C_tensor,
        self_: *mut C_tensor,
        weight_: *mut C_tensor,
    );
    pub fn atg_prod(out__: *mut *mut C_tensor, self_: *mut C_tensor, dtype_: c_int);
    pub fn atg_prod1(
        out__: *mut *mut C_tensor,
        self_: *mut C_tensor,
        dim_: i64,
        keepdim_: c_int,
        dtype_: c_int,
    );
    pub fn atg_prod_out(
        out__: *mut *mut C_tensor,
        out_: *mut C_tensor,
        self_: *mut C_tensor,
        dim_: i64,
        keepdim_: c_int,
        dtype_: c_int,
    );
    pub fn atg_put_(
        out__: *mut *mut C_tensor,
        self_: *mut C_tensor,
        index_: *mut C_tensor,
        source_: *mut C_tensor,
        accumulate_: c_int,
    );
    pub fn atg_q_per_channel_scales(out__: *mut *mut C_tensor, self_: *mut C_tensor);
    pub fn atg_q_per_channel_zero_points(out__: *mut *mut C_tensor, self_: *mut C_tensor);
    pub fn atg_qr(out__: *mut *mut C_tensor, self_: *mut C_tensor, some_: c_int);
    pub fn atg_qr_out(
        out__: *mut *mut C_tensor,
        Q_: *mut C_tensor,
        R_: *mut C_tensor,
        self_: *mut C_tensor,
        some_: c_int,
    );
    pub fn atg_quantile(
        out__: *mut *mut C_tensor,
        self_: *mut C_tensor,
        q_: f64,
        dim_v: i64,
        dim_null: i8,
        keepdim_: c_int,
    );
    pub fn atg_quantile1(
        out__: *mut *mut C_tensor,
        self_: *mut C_tensor,
        q_: *mut C_tensor,
        dim_v: i64,
        dim_null: i8,
        keepdim_: c_int,
    );
    pub fn atg_quantile_out(
        out__: *mut *mut C_tensor,
        out_: *mut C_tensor,
        self_: *mut C_tensor,
        q_: f64,
        dim_v: i64,
        dim_null: i8,
        keepdim_: c_int,
    );
    pub fn atg_quantile_out1(
        out__: *mut *mut C_tensor,
        out_: *mut C_tensor,
        self_: *mut C_tensor,
        q_: *mut C_tensor,
        dim_v: i64,
        dim_null: i8,
        keepdim_: c_int,
    );
    pub fn atg_quantize_per_channel(
        out__: *mut *mut C_tensor,
        self_: *mut C_tensor,
        scales_: *mut C_tensor,
        zero_points_: *mut C_tensor,
        axis_: i64,
        dtype_: c_int,
    );
    pub fn atg_quantize_per_tensor(
        out__: *mut *mut C_tensor,
        self_: *mut C_tensor,
        scale_: f64,
        zero_point_: i64,
        dtype_: c_int,
    );
    pub fn atg_quantize_per_tensor1(
        tensors_data: *const *mut C_tensor,
        tensors_len: c_int,
        scales_: *mut C_tensor,
        zero_points_: *mut C_tensor,
        dtype_: c_int,
    ) -> *mut *mut C_tensor;
    pub fn atg_quantized_batch_norm(
        out__: *mut *mut C_tensor,
        input_: *mut C_tensor,
        weight_: *mut C_tensor,
        bias_: *mut C_tensor,
        mean_: *mut C_tensor,
        var_: *mut C_tensor,
        eps_: f64,
        output_scale_: f64,
        output_zero_point_: i64,
    );
    pub fn atg_quantized_gru_cell(
        out__: *mut *mut C_tensor,
        input_: *mut C_tensor,
        hx_: *mut C_tensor,
        w_ih_: *mut C_tensor,
        w_hh_: *mut C_tensor,
        b_ih_: *mut C_tensor,
        b_hh_: *mut C_tensor,
        packed_ih_: *mut C_tensor,
        packed_hh_: *mut C_tensor,
        col_offsets_ih_: *mut C_tensor,
        col_offsets_hh_: *mut C_tensor,
        scale_ih_: *mut C_scalar,
        scale_hh_: *mut C_scalar,
        zero_point_ih_: *mut C_scalar,
        zero_point_hh_: *mut C_scalar,
    );
    pub fn atg_quantized_lstm_cell(
        out__: *mut *mut C_tensor,
        input_: *mut C_tensor,
        hx_data: *const *mut C_tensor,
        hx_len: c_int,
        w_ih_: *mut C_tensor,
        w_hh_: *mut C_tensor,
        b_ih_: *mut C_tensor,
        b_hh_: *mut C_tensor,
        packed_ih_: *mut C_tensor,
        packed_hh_: *mut C_tensor,
        col_offsets_ih_: *mut C_tensor,
        col_offsets_hh_: *mut C_tensor,
        scale_ih_: *mut C_scalar,
        scale_hh_: *mut C_scalar,
        zero_point_ih_: *mut C_scalar,
        zero_point_hh_: *mut C_scalar,
    );
    pub fn atg_quantized_max_pool1d(
        out__: *mut *mut C_tensor,
        self_: *mut C_tensor,
        kernel_size_data: *const i64,
        kernel_size_len: c_int,
        stride_data: *const i64,
        stride_len: c_int,
        padding_data: *const i64,
        padding_len: c_int,
        dilation_data: *const i64,
        dilation_len: c_int,
        ceil_mode_: c_int,
    );
    pub fn atg_quantized_max_pool2d(
        out__: *mut *mut C_tensor,
        self_: *mut C_tensor,
        kernel_size_data: *const i64,
        kernel_size_len: c_int,
        stride_data: *const i64,
        stride_len: c_int,
        padding_data: *const i64,
        padding_len: c_int,
        dilation_data: *const i64,
        dilation_len: c_int,
        ceil_mode_: c_int,
    );
    pub fn atg_quantized_rnn_relu_cell(
        out__: *mut *mut C_tensor,
        input_: *mut C_tensor,
        hx_: *mut C_tensor,
        w_ih_: *mut C_tensor,
        w_hh_: *mut C_tensor,
        b_ih_: *mut C_tensor,
        b_hh_: *mut C_tensor,
        packed_ih_: *mut C_tensor,
        packed_hh_: *mut C_tensor,
        col_offsets_ih_: *mut C_tensor,
        col_offsets_hh_: *mut C_tensor,
        scale_ih_: *mut C_scalar,
        scale_hh_: *mut C_scalar,
        zero_point_ih_: *mut C_scalar,
        zero_point_hh_: *mut C_scalar,
    );
    pub fn atg_quantized_rnn_tanh_cell(
        out__: *mut *mut C_tensor,
        input_: *mut C_tensor,
        hx_: *mut C_tensor,
        w_ih_: *mut C_tensor,
        w_hh_: *mut C_tensor,
        b_ih_: *mut C_tensor,
        b_hh_: *mut C_tensor,
        packed_ih_: *mut C_tensor,
        packed_hh_: *mut C_tensor,
        col_offsets_ih_: *mut C_tensor,
        col_offsets_hh_: *mut C_tensor,
        scale_ih_: *mut C_scalar,
        scale_hh_: *mut C_scalar,
        zero_point_ih_: *mut C_scalar,
        zero_point_hh_: *mut C_scalar,
    );
    pub fn atg_rad2deg(out__: *mut *mut C_tensor, self_: *mut C_tensor);
    pub fn atg_rad2deg_(out__: *mut *mut C_tensor, self_: *mut C_tensor);
    pub fn atg_rad2deg_out(out__: *mut *mut C_tensor, out_: *mut C_tensor, self_: *mut C_tensor);
    pub fn atg_rand(
        out__: *mut *mut C_tensor,
        size_data: *const i64,
        size_len: c_int,
        options_kind: c_int,
        options_device: c_int,
    );
    pub fn atg_rand_like(out__: *mut *mut C_tensor, self_: *mut C_tensor);
    pub fn atg_rand_out(
        out__: *mut *mut C_tensor,
        out_: *mut C_tensor,
        size_data: *const i64,
        size_len: c_int,
    );
    pub fn atg_randint(
        out__: *mut *mut C_tensor,
        high_: i64,
        size_data: *const i64,
        size_len: c_int,
        options_kind: c_int,
        options_device: c_int,
    );
    pub fn atg_randint1(
        out__: *mut *mut C_tensor,
        low_: i64,
        high_: i64,
        size_data: *const i64,
        size_len: c_int,
        options_kind: c_int,
        options_device: c_int,
    );
    pub fn atg_randint_like(out__: *mut *mut C_tensor, self_: *mut C_tensor, high_: i64);
    pub fn atg_randint_like1(
        out__: *mut *mut C_tensor,
        self_: *mut C_tensor,
        low_: i64,
        high_: i64,
    );
    pub fn atg_randint_out(
        out__: *mut *mut C_tensor,
        out_: *mut C_tensor,
        high_: i64,
        size_data: *const i64,
        size_len: c_int,
    );
    pub fn atg_randint_out1(
        out__: *mut *mut C_tensor,
        out_: *mut C_tensor,
        low_: i64,
        high_: i64,
        size_data: *const i64,
        size_len: c_int,
    );
    pub fn atg_randn(
        out__: *mut *mut C_tensor,
        size_data: *const i64,
        size_len: c_int,
        options_kind: c_int,
        options_device: c_int,
    );
    pub fn atg_randn_like(out__: *mut *mut C_tensor, self_: *mut C_tensor);
    pub fn atg_randn_out(
        out__: *mut *mut C_tensor,
        out_: *mut C_tensor,
        size_data: *const i64,
        size_len: c_int,
    );
    pub fn atg_random_(out__: *mut *mut C_tensor, self_: *mut C_tensor);
    pub fn atg_random_1(out__: *mut *mut C_tensor, self_: *mut C_tensor, to_: i64);
    pub fn atg_random_2(
        out__: *mut *mut C_tensor,
        self_: *mut C_tensor,
        from_: i64,
        to_v: i64,
        to_null: i8,
    );
    pub fn atg_randperm(
        out__: *mut *mut C_tensor,
        n_: i64,
        options_kind: c_int,
        options_device: c_int,
    );
    pub fn atg_randperm_out(out__: *mut *mut C_tensor, out_: *mut C_tensor, n_: i64);
    pub fn atg_range(
        out__: *mut *mut C_tensor,
        start_: *mut C_scalar,
        end_: *mut C_scalar,
        options_kind: c_int,
        options_device: c_int,
    );
    pub fn atg_range1(
        out__: *mut *mut C_tensor,
        start_: *mut C_scalar,
        end_: *mut C_scalar,
        options_kind: c_int,
        options_device: c_int,
    );
    pub fn atg_range_out(
        out__: *mut *mut C_tensor,
        out_: *mut C_tensor,
        start_: *mut C_scalar,
        end_: *mut C_scalar,
    );
    pub fn atg_ravel(out__: *mut *mut C_tensor, self_: *mut C_tensor);
    pub fn atg_real(out__: *mut *mut C_tensor, self_: *mut C_tensor);
    pub fn atg_reciprocal(out__: *mut *mut C_tensor, self_: *mut C_tensor);
    pub fn atg_reciprocal_(out__: *mut *mut C_tensor, self_: *mut C_tensor);
    pub fn atg_reciprocal_out(out__: *mut *mut C_tensor, out_: *mut C_tensor, self_: *mut C_tensor);
    pub fn atg_reflection_pad1d(
        out__: *mut *mut C_tensor,
        self_: *mut C_tensor,
        padding_data: *const i64,
        padding_len: c_int,
    );
    pub fn atg_reflection_pad1d_backward(
        out__: *mut *mut C_tensor,
        grad_output_: *mut C_tensor,
        self_: *mut C_tensor,
        padding_data: *const i64,
        padding_len: c_int,
    );
    pub fn atg_reflection_pad1d_backward_out(
        out__: *mut *mut C_tensor,
        grad_input_: *mut C_tensor,
        grad_output_: *mut C_tensor,
        self_: *mut C_tensor,
        padding_data: *const i64,
        padding_len: c_int,
    );
    pub fn atg_reflection_pad1d_out(
        out__: *mut *mut C_tensor,
        out_: *mut C_tensor,
        self_: *mut C_tensor,
        padding_data: *const i64,
        padding_len: c_int,
    );
    pub fn atg_reflection_pad2d(
        out__: *mut *mut C_tensor,
        self_: *mut C_tensor,
        padding_data: *const i64,
        padding_len: c_int,
    );
    pub fn atg_reflection_pad2d_backward(
        out__: *mut *mut C_tensor,
        grad_output_: *mut C_tensor,
        self_: *mut C_tensor,
        padding_data: *const i64,
        padding_len: c_int,
    );
    pub fn atg_reflection_pad2d_backward_out(
        out__: *mut *mut C_tensor,
        grad_input_: *mut C_tensor,
        grad_output_: *mut C_tensor,
        self_: *mut C_tensor,
        padding_data: *const i64,
        padding_len: c_int,
    );
    pub fn atg_reflection_pad2d_out(
        out__: *mut *mut C_tensor,
        out_: *mut C_tensor,
        self_: *mut C_tensor,
        padding_data: *const i64,
        padding_len: c_int,
    );
    pub fn atg_relu(out__: *mut *mut C_tensor, self_: *mut C_tensor);
    pub fn atg_relu_(out__: *mut *mut C_tensor, self_: *mut C_tensor);
    pub fn atg_remainder(out__: *mut *mut C_tensor, self_: *mut C_tensor, other_: *mut C_scalar);
    pub fn atg_remainder1(out__: *mut *mut C_tensor, self_: *mut C_tensor, other_: *mut C_tensor);
    pub fn atg_remainder_(out__: *mut *mut C_tensor, self_: *mut C_tensor, other_: *mut C_scalar);
    pub fn atg_remainder_1(out__: *mut *mut C_tensor, self_: *mut C_tensor, other_: *mut C_tensor);
    pub fn atg_remainder_out(
        out__: *mut *mut C_tensor,
        out_: *mut C_tensor,
        self_: *mut C_tensor,
        other_: *mut C_scalar,
    );
    pub fn atg_remainder_out1(
        out__: *mut *mut C_tensor,
        out_: *mut C_tensor,
        self_: *mut C_tensor,
        other_: *mut C_tensor,
    );
    pub fn atg_renorm(
        out__: *mut *mut C_tensor,
        self_: *mut C_tensor,
        p_: *mut C_scalar,
        dim_: i64,
        maxnorm_: *mut C_scalar,
    );
    pub fn atg_renorm_(
        out__: *mut *mut C_tensor,
        self_: *mut C_tensor,
        p_: *mut C_scalar,
        dim_: i64,
        maxnorm_: *mut C_scalar,
    );
    pub fn atg_renorm_out(
        out__: *mut *mut C_tensor,
        out_: *mut C_tensor,
        self_: *mut C_tensor,
        p_: *mut C_scalar,
        dim_: i64,
        maxnorm_: *mut C_scalar,
    );
    pub fn atg_repeat(
        out__: *mut *mut C_tensor,
        self_: *mut C_tensor,
        repeats_data: *const i64,
        repeats_len: c_int,
    );
    pub fn atg_repeat_interleave(out__: *mut *mut C_tensor, repeats_: *mut C_tensor);
    pub fn atg_repeat_interleave1(
        out__: *mut *mut C_tensor,
        self_: *mut C_tensor,
        repeats_: *mut C_tensor,
        dim_v: i64,
        dim_null: i8,
    );
    pub fn atg_repeat_interleave2(
        out__: *mut *mut C_tensor,
        self_: *mut C_tensor,
        repeats_: i64,
        dim_v: i64,
        dim_null: i8,
    );
    pub fn atg_replication_pad1d(
        out__: *mut *mut C_tensor,
        self_: *mut C_tensor,
        padding_data: *const i64,
        padding_len: c_int,
    );
    pub fn atg_replication_pad1d_backward(
        out__: *mut *mut C_tensor,
        grad_output_: *mut C_tensor,
        self_: *mut C_tensor,
        padding_data: *const i64,
        padding_len: c_int,
    );
    pub fn atg_replication_pad1d_backward_out(
        out__: *mut *mut C_tensor,
        grad_input_: *mut C_tensor,
        grad_output_: *mut C_tensor,
        self_: *mut C_tensor,
        padding_data: *const i64,
        padding_len: c_int,
    );
    pub fn atg_replication_pad1d_out(
        out__: *mut *mut C_tensor,
        out_: *mut C_tensor,
        self_: *mut C_tensor,
        padding_data: *const i64,
        padding_len: c_int,
    );
    pub fn atg_replication_pad2d(
        out__: *mut *mut C_tensor,
        self_: *mut C_tensor,
        padding_data: *const i64,
        padding_len: c_int,
    );
    pub fn atg_replication_pad2d_backward(
        out__: *mut *mut C_tensor,
        grad_output_: *mut C_tensor,
        self_: *mut C_tensor,
        padding_data: *const i64,
        padding_len: c_int,
    );
    pub fn atg_replication_pad2d_backward_out(
        out__: *mut *mut C_tensor,
        grad_input_: *mut C_tensor,
        grad_output_: *mut C_tensor,
        self_: *mut C_tensor,
        padding_data: *const i64,
        padding_len: c_int,
    );
    pub fn atg_replication_pad2d_out(
        out__: *mut *mut C_tensor,
        out_: *mut C_tensor,
        self_: *mut C_tensor,
        padding_data: *const i64,
        padding_len: c_int,
    );
    pub fn atg_replication_pad3d(
        out__: *mut *mut C_tensor,
        self_: *mut C_tensor,
        padding_data: *const i64,
        padding_len: c_int,
    );
    pub fn atg_replication_pad3d_backward(
        out__: *mut *mut C_tensor,
        grad_output_: *mut C_tensor,
        self_: *mut C_tensor,
        padding_data: *const i64,
        padding_len: c_int,
    );
    pub fn atg_replication_pad3d_backward_out(
        out__: *mut *mut C_tensor,
        grad_input_: *mut C_tensor,
        grad_output_: *mut C_tensor,
        self_: *mut C_tensor,
        padding_data: *const i64,
        padding_len: c_int,
    );
    pub fn atg_replication_pad3d_out(
        out__: *mut *mut C_tensor,
        out_: *mut C_tensor,
        self_: *mut C_tensor,
        padding_data: *const i64,
        padding_len: c_int,
    );
    pub fn atg_requires_grad_(
        out__: *mut *mut C_tensor,
        self_: *mut C_tensor,
        requires_grad_: c_int,
    );
    pub fn atg_reshape(
        out__: *mut *mut C_tensor,
        self_: *mut C_tensor,
        shape_data: *const i64,
        shape_len: c_int,
    );
    pub fn atg_reshape_as(out__: *mut *mut C_tensor, self_: *mut C_tensor, other_: *mut C_tensor);
    pub fn atg_resize_(
        out__: *mut *mut C_tensor,
        self_: *mut C_tensor,
        size_data: *const i64,
        size_len: c_int,
    );
    pub fn atg_resize_as_(
        out__: *mut *mut C_tensor,
        self_: *mut C_tensor,
        the_template_: *mut C_tensor,
    );
    pub fn atg_rnn_relu(
        out__: *mut *mut C_tensor,
        input_: *mut C_tensor,
        hx_: *mut C_tensor,
        params_data: *const *mut C_tensor,
        params_len: c_int,
        has_biases_: c_int,
        num_layers_: i64,
        dropout_: f64,
        train_: c_int,
        bidirectional_: c_int,
        batch_first_: c_int,
    );
    pub fn atg_rnn_relu1(
        out__: *mut *mut C_tensor,
        data_: *mut C_tensor,
        batch_sizes_: *mut C_tensor,
        hx_: *mut C_tensor,
        params_data: *const *mut C_tensor,
        params_len: c_int,
        has_biases_: c_int,
        num_layers_: i64,
        dropout_: f64,
        train_: c_int,
        bidirectional_: c_int,
    );
    pub fn atg_rnn_relu_cell(
        out__: *mut *mut C_tensor,
        input_: *mut C_tensor,
        hx_: *mut C_tensor,
        w_ih_: *mut C_tensor,
        w_hh_: *mut C_tensor,
        b_ih_: *mut C_tensor,
        b_hh_: *mut C_tensor,
    );
    pub fn atg_rnn_tanh(
        out__: *mut *mut C_tensor,
        input_: *mut C_tensor,
        hx_: *mut C_tensor,
        params_data: *const *mut C_tensor,
        params_len: c_int,
        has_biases_: c_int,
        num_layers_: i64,
        dropout_: f64,
        train_: c_int,
        bidirectional_: c_int,
        batch_first_: c_int,
    );
    pub fn atg_rnn_tanh1(
        out__: *mut *mut C_tensor,
        data_: *mut C_tensor,
        batch_sizes_: *mut C_tensor,
        hx_: *mut C_tensor,
        params_data: *const *mut C_tensor,
        params_len: c_int,
        has_biases_: c_int,
        num_layers_: i64,
        dropout_: f64,
        train_: c_int,
        bidirectional_: c_int,
    );
    pub fn atg_rnn_tanh_cell(
        out__: *mut *mut C_tensor,
        input_: *mut C_tensor,
        hx_: *mut C_tensor,
        w_ih_: *mut C_tensor,
        w_hh_: *mut C_tensor,
        b_ih_: *mut C_tensor,
        b_hh_: *mut C_tensor,
    );
    pub fn atg_roll(
        out__: *mut *mut C_tensor,
        self_: *mut C_tensor,
        shifts_data: *const i64,
        shifts_len: c_int,
        dims_data: *const i64,
        dims_len: c_int,
    );
    pub fn atg_rot90(
        out__: *mut *mut C_tensor,
        self_: *mut C_tensor,
        k_: i64,
        dims_data: *const i64,
        dims_len: c_int,
    );
    pub fn atg_round(out__: *mut *mut C_tensor, self_: *mut C_tensor);
    pub fn atg_round_(out__: *mut *mut C_tensor, self_: *mut C_tensor);
    pub fn atg_round_out(out__: *mut *mut C_tensor, out_: *mut C_tensor, self_: *mut C_tensor);
    pub fn atg_row_stack(
        out__: *mut *mut C_tensor,
        tensors_data: *const *mut C_tensor,
        tensors_len: c_int,
    );
    pub fn atg_row_stack_out(
        out__: *mut *mut C_tensor,
        out_: *mut C_tensor,
        tensors_data: *const *mut C_tensor,
        tensors_len: c_int,
    );
    pub fn atg_rrelu(out__: *mut *mut C_tensor, self_: *mut C_tensor, training_: c_int);
    pub fn atg_rrelu_(out__: *mut *mut C_tensor, self_: *mut C_tensor, training_: c_int);
    pub fn atg_rrelu_with_noise(
        out__: *mut *mut C_tensor,
        self_: *mut C_tensor,
        noise_: *mut C_tensor,
        training_: c_int,
    );
    pub fn atg_rrelu_with_noise_(
        out__: *mut *mut C_tensor,
        self_: *mut C_tensor,
        noise_: *mut C_tensor,
        training_: c_int,
    );
    pub fn atg_rrelu_with_noise_backward(
        out__: *mut *mut C_tensor,
        grad_output_: *mut C_tensor,
        self_: *mut C_tensor,
        noise_: *mut C_tensor,
        lower_: *mut C_scalar,
        upper_: *mut C_scalar,
        training_: c_int,
        self_is_result_: c_int,
    );
    pub fn atg_rrelu_with_noise_out(
        out__: *mut *mut C_tensor,
        out_: *mut C_tensor,
        self_: *mut C_tensor,
        noise_: *mut C_tensor,
        training_: c_int,
    );
    pub fn atg_rsqrt(out__: *mut *mut C_tensor, self_: *mut C_tensor);
    pub fn atg_rsqrt_(out__: *mut *mut C_tensor, self_: *mut C_tensor);
    pub fn atg_rsqrt_out(out__: *mut *mut C_tensor, out_: *mut C_tensor, self_: *mut C_tensor);
    pub fn atg_rsub(out__: *mut *mut C_tensor, self_: *mut C_tensor, other_: *mut C_tensor);
    pub fn atg_rsub1(out__: *mut *mut C_tensor, self_: *mut C_tensor, other_: *mut C_scalar);
    pub fn atg_scalar_tensor(
        out__: *mut *mut C_tensor,
        s_: *mut C_scalar,
        options_kind: c_int,
        options_device: c_int,
    );
    pub fn atg_scatter(
        out__: *mut *mut C_tensor,
        self_: *mut C_tensor,
        dim_: i64,
        index_: *mut C_tensor,
        src_: *mut C_tensor,
    );
    pub fn atg_scatter1(
        out__: *mut *mut C_tensor,
        self_: *mut C_tensor,
        dim_: i64,
        index_: *mut C_tensor,
        value_: *mut C_scalar,
    );
    pub fn atg_scatter_(
        out__: *mut *mut C_tensor,
        self_: *mut C_tensor,
        dim_: i64,
        index_: *mut C_tensor,
        src_: *mut C_tensor,
    );
    pub fn atg_scatter_1(
        out__: *mut *mut C_tensor,
        self_: *mut C_tensor,
        dim_: i64,
        index_: *mut C_tensor,
        value_: *mut C_scalar,
    );
    pub fn atg_scatter_2(
        out__: *mut *mut C_tensor,
        self_: *mut C_tensor,
        dim_: i64,
        index_: *mut C_tensor,
        src_: *mut C_tensor,
        reduce_ptr: *const u8,
        reduce_len: c_int,
    );
    pub fn atg_scatter_3(
        out__: *mut *mut C_tensor,
        self_: *mut C_tensor,
        dim_: i64,
        index_: *mut C_tensor,
        value_: *mut C_scalar,
        reduce_ptr: *const u8,
        reduce_len: c_int,
    );
    pub fn atg_scatter_add(
        out__: *mut *mut C_tensor,
        self_: *mut C_tensor,
        dim_: i64,
        index_: *mut C_tensor,
        src_: *mut C_tensor,
    );
    pub fn atg_scatter_add_(
        out__: *mut *mut C_tensor,
        self_: *mut C_tensor,
        dim_: i64,
        index_: *mut C_tensor,
        src_: *mut C_tensor,
    );
    pub fn atg_searchsorted(
        out__: *mut *mut C_tensor,
        sorted_sequence_: *mut C_tensor,
        self_: *mut C_tensor,
        out_int32_: c_int,
        right_: c_int,
    );
    pub fn atg_searchsorted1(
        out__: *mut *mut C_tensor,
        sorted_sequence_: *mut C_tensor,
        self_scalar_: *mut C_scalar,
        out_int32_: c_int,
        right_: c_int,
    );
    pub fn atg_searchsorted_out(
        out__: *mut *mut C_tensor,
        out_: *mut C_tensor,
        sorted_sequence_: *mut C_tensor,
        self_: *mut C_tensor,
        out_int32_: c_int,
        right_: c_int,
    );
    pub fn atg_select(out__: *mut *mut C_tensor, self_: *mut C_tensor, dim_: i64, index_: i64);
    pub fn atg_select_backward(
        out__: *mut *mut C_tensor,
        grad_: *mut C_tensor,
        input_sizes_data: *const i64,
        input_sizes_len: c_int,
        dim_: i64,
        index_: i64,
    );
    pub fn atg_selu(out__: *mut *mut C_tensor, self_: *mut C_tensor);
    pub fn atg_selu_(out__: *mut *mut C_tensor, self_: *mut C_tensor);
    pub fn atg_set_(out__: *mut *mut C_tensor, self_: *mut C_tensor);
    pub fn atg_set_1(out__: *mut *mut C_tensor, self_: *mut C_tensor, source_: *mut C_tensor);
    pub fn atg_set_requires_grad(out__: *mut *mut C_tensor, self_: *mut C_tensor, r_: c_int);
    pub fn atg_sgn(out__: *mut *mut C_tensor, self_: *mut C_tensor);
    pub fn atg_sgn_(out__: *mut *mut C_tensor, self_: *mut C_tensor);
    pub fn atg_sgn_out(out__: *mut *mut C_tensor, out_: *mut C_tensor, self_: *mut C_tensor);
    pub fn atg_sigmoid(out__: *mut *mut C_tensor, self_: *mut C_tensor);
    pub fn atg_sigmoid_(out__: *mut *mut C_tensor, self_: *mut C_tensor);
    pub fn atg_sigmoid_backward(
        out__: *mut *mut C_tensor,
        grad_output_: *mut C_tensor,
        output_: *mut C_tensor,
    );
    pub fn atg_sigmoid_backward_out(
        out__: *mut *mut C_tensor,
        grad_input_: *mut C_tensor,
        grad_output_: *mut C_tensor,
        output_: *mut C_tensor,
    );
    pub fn atg_sigmoid_out(out__: *mut *mut C_tensor, out_: *mut C_tensor, self_: *mut C_tensor);
    pub fn atg_sign(out__: *mut *mut C_tensor, self_: *mut C_tensor);
    pub fn atg_sign_(out__: *mut *mut C_tensor, self_: *mut C_tensor);
    pub fn atg_sign_out(out__: *mut *mut C_tensor, out_: *mut C_tensor, self_: *mut C_tensor);
    pub fn atg_signbit(out__: *mut *mut C_tensor, self_: *mut C_tensor);
    pub fn atg_signbit_out(out__: *mut *mut C_tensor, out_: *mut C_tensor, self_: *mut C_tensor);
    pub fn atg_silu(out__: *mut *mut C_tensor, self_: *mut C_tensor);
    pub fn atg_silu_(out__: *mut *mut C_tensor, self_: *mut C_tensor);
    pub fn atg_silu_backward(
        out__: *mut *mut C_tensor,
        grad_output_: *mut C_tensor,
        self_: *mut C_tensor,
    );
    pub fn atg_silu_out(out__: *mut *mut C_tensor, out_: *mut C_tensor, self_: *mut C_tensor);
    pub fn atg_sin(out__: *mut *mut C_tensor, self_: *mut C_tensor);
    pub fn atg_sin_(out__: *mut *mut C_tensor, self_: *mut C_tensor);
    pub fn atg_sin_out(out__: *mut *mut C_tensor, out_: *mut C_tensor, self_: *mut C_tensor);
    pub fn atg_sinc(out__: *mut *mut C_tensor, self_: *mut C_tensor);
    pub fn atg_sinc_(out__: *mut *mut C_tensor, self_: *mut C_tensor);
    pub fn atg_sinc_out(out__: *mut *mut C_tensor, out_: *mut C_tensor, self_: *mut C_tensor);
    pub fn atg_sinh(out__: *mut *mut C_tensor, self_: *mut C_tensor);
    pub fn atg_sinh_(out__: *mut *mut C_tensor, self_: *mut C_tensor);
    pub fn atg_sinh_out(out__: *mut *mut C_tensor, out_: *mut C_tensor, self_: *mut C_tensor);
    pub fn atg_slice(
        out__: *mut *mut C_tensor,
        self_: *mut C_tensor,
        dim_: i64,
        start_v: i64,
        start_null: i8,
        end_v: i64,
        end_null: i8,
        step_: i64,
    );
    pub fn atg_slice_backward(
        out__: *mut *mut C_tensor,
        grad_: *mut C_tensor,
        input_sizes_data: *const i64,
        input_sizes_len: c_int,
        dim_: i64,
        start_: i64,
        end_: i64,
        step_: i64,
    );
    pub fn atg_slogdet(out__: *mut *mut C_tensor, self_: *mut C_tensor);
    pub fn atg_slow_conv3d(
        out__: *mut *mut C_tensor,
        self_: *mut C_tensor,
        weight_: *mut C_tensor,
        kernel_size_data: *const i64,
        kernel_size_len: c_int,
        bias_: *mut C_tensor,
        stride_data: *const i64,
        stride_len: c_int,
        padding_data: *const i64,
        padding_len: c_int,
    );
    pub fn atg_slow_conv3d_out(
        out__: *mut *mut C_tensor,
        out_: *mut C_tensor,
        self_: *mut C_tensor,
        weight_: *mut C_tensor,
        kernel_size_data: *const i64,
        kernel_size_len: c_int,
        bias_: *mut C_tensor,
        stride_data: *const i64,
        stride_len: c_int,
        padding_data: *const i64,
        padding_len: c_int,
    );
    pub fn atg_slow_conv_dilated2d(
        out__: *mut *mut C_tensor,
        self_: *mut C_tensor,
        weight_: *mut C_tensor,
        kernel_size_data: *const i64,
        kernel_size_len: c_int,
        bias_: *mut C_tensor,
        stride_data: *const i64,
        stride_len: c_int,
        padding_data: *const i64,
        padding_len: c_int,
        dilation_data: *const i64,
        dilation_len: c_int,
    );
    pub fn atg_slow_conv_dilated3d(
        out__: *mut *mut C_tensor,
        self_: *mut C_tensor,
        weight_: *mut C_tensor,
        kernel_size_data: *const i64,
        kernel_size_len: c_int,
        bias_: *mut C_tensor,
        stride_data: *const i64,
        stride_len: c_int,
        padding_data: *const i64,
        padding_len: c_int,
        dilation_data: *const i64,
        dilation_len: c_int,
    );
    pub fn atg_slow_conv_transpose2d(
        out__: *mut *mut C_tensor,
        self_: *mut C_tensor,
        weight_: *mut C_tensor,
        kernel_size_data: *const i64,
        kernel_size_len: c_int,
        bias_: *mut C_tensor,
        stride_data: *const i64,
        stride_len: c_int,
        padding_data: *const i64,
        padding_len: c_int,
        output_padding_data: *const i64,
        output_padding_len: c_int,
        dilation_data: *const i64,
        dilation_len: c_int,
    );
    pub fn atg_slow_conv_transpose2d_out(
        out__: *mut *mut C_tensor,
        out_: *mut C_tensor,
        self_: *mut C_tensor,
        weight_: *mut C_tensor,
        kernel_size_data: *const i64,
        kernel_size_len: c_int,
        bias_: *mut C_tensor,
        stride_data: *const i64,
        stride_len: c_int,
        padding_data: *const i64,
        padding_len: c_int,
        output_padding_data: *const i64,
        output_padding_len: c_int,
        dilation_data: *const i64,
        dilation_len: c_int,
    );
    pub fn atg_slow_conv_transpose3d(
        out__: *mut *mut C_tensor,
        self_: *mut C_tensor,
        weight_: *mut C_tensor,
        kernel_size_data: *const i64,
        kernel_size_len: c_int,
        bias_: *mut C_tensor,
        stride_data: *const i64,
        stride_len: c_int,
        padding_data: *const i64,
        padding_len: c_int,
        output_padding_data: *const i64,
        output_padding_len: c_int,
        dilation_data: *const i64,
        dilation_len: c_int,
    );
    pub fn atg_slow_conv_transpose3d_out(
        out__: *mut *mut C_tensor,
        out_: *mut C_tensor,
        self_: *mut C_tensor,
        weight_: *mut C_tensor,
        kernel_size_data: *const i64,
        kernel_size_len: c_int,
        bias_: *mut C_tensor,
        stride_data: *const i64,
        stride_len: c_int,
        padding_data: *const i64,
        padding_len: c_int,
        output_padding_data: *const i64,
        output_padding_len: c_int,
        dilation_data: *const i64,
        dilation_len: c_int,
    );
    pub fn atg_smm(out__: *mut *mut C_tensor, self_: *mut C_tensor, mat2_: *mut C_tensor);
    pub fn atg_smooth_l1_loss(
        out__: *mut *mut C_tensor,
        self_: *mut C_tensor,
        target_: *mut C_tensor,
        reduction_: i64,
        beta_: f64,
    );
    pub fn atg_smooth_l1_loss_backward(
        out__: *mut *mut C_tensor,
        grad_output_: *mut C_tensor,
        self_: *mut C_tensor,
        target_: *mut C_tensor,
        reduction_: i64,
        beta_: f64,
    );
    pub fn atg_smooth_l1_loss_backward_out(
        out__: *mut *mut C_tensor,
        grad_input_: *mut C_tensor,
        grad_output_: *mut C_tensor,
        self_: *mut C_tensor,
        target_: *mut C_tensor,
        reduction_: i64,
        beta_: f64,
    );
    pub fn atg_smooth_l1_loss_out(
        out__: *mut *mut C_tensor,
        out_: *mut C_tensor,
        self_: *mut C_tensor,
        target_: *mut C_tensor,
        reduction_: i64,
        beta_: f64,
    );
    pub fn atg_soft_margin_loss(
        out__: *mut *mut C_tensor,
        self_: *mut C_tensor,
        target_: *mut C_tensor,
        reduction_: i64,
    );
    pub fn atg_soft_margin_loss_backward(
        out__: *mut *mut C_tensor,
        grad_output_: *mut C_tensor,
        self_: *mut C_tensor,
        target_: *mut C_tensor,
        reduction_: i64,
    );
    pub fn atg_soft_margin_loss_backward_out(
        out__: *mut *mut C_tensor,
        grad_input_: *mut C_tensor,
        grad_output_: *mut C_tensor,
        self_: *mut C_tensor,
        target_: *mut C_tensor,
        reduction_: i64,
    );
    pub fn atg_soft_margin_loss_out(
        out__: *mut *mut C_tensor,
        out_: *mut C_tensor,
        self_: *mut C_tensor,
        target_: *mut C_tensor,
        reduction_: i64,
    );
    pub fn atg_softmax(out__: *mut *mut C_tensor, self_: *mut C_tensor, dim_: i64, dtype_: c_int);
    pub fn atg_softplus(out__: *mut *mut C_tensor, self_: *mut C_tensor);
    pub fn atg_softplus_backward(
        out__: *mut *mut C_tensor,
        grad_output_: *mut C_tensor,
        self_: *mut C_tensor,
        beta_: *mut C_scalar,
        threshold_: *mut C_scalar,
        output_: *mut C_tensor,
    );
    pub fn atg_softplus_backward_out(
        out__: *mut *mut C_tensor,
        grad_input_: *mut C_tensor,
        grad_output_: *mut C_tensor,
        self_: *mut C_tensor,
        beta_: *mut C_scalar,
        threshold_: *mut C_scalar,
        output_: *mut C_tensor,
    );
    pub fn atg_softplus_out(out__: *mut *mut C_tensor, out_: *mut C_tensor, self_: *mut C_tensor);
    pub fn atg_softshrink(out__: *mut *mut C_tensor, self_: *mut C_tensor);
    pub fn atg_softshrink_backward(
        out__: *mut *mut C_tensor,
        grad_output_: *mut C_tensor,
        self_: *mut C_tensor,
        lambd_: *mut C_scalar,
    );
    pub fn atg_softshrink_backward_out(
        out__: *mut *mut C_tensor,
        grad_input_: *mut C_tensor,
        grad_output_: *mut C_tensor,
        self_: *mut C_tensor,
        lambd_: *mut C_scalar,
    );
    pub fn atg_softshrink_out(out__: *mut *mut C_tensor, out_: *mut C_tensor, self_: *mut C_tensor);
    pub fn atg_solve(out__: *mut *mut C_tensor, self_: *mut C_tensor, A_: *mut C_tensor);
    pub fn atg_solve_out(
        out__: *mut *mut C_tensor,
        solution_: *mut C_tensor,
        lu_: *mut C_tensor,
        self_: *mut C_tensor,
        A_: *mut C_tensor,
    );
    pub fn atg_sort(out__: *mut *mut C_tensor, self_: *mut C_tensor, dim_: i64, descending_: c_int);
    pub fn atg_sort_out(
        out__: *mut *mut C_tensor,
        values_: *mut C_tensor,
        indices_: *mut C_tensor,
        self_: *mut C_tensor,
        dim_: i64,
        descending_: c_int,
    );
    pub fn atg_sparse_coo_tensor(
        out__: *mut *mut C_tensor,
        size_data: *const i64,
        size_len: c_int,
        options_kind: c_int,
        options_device: c_int,
    );
    pub fn atg_sparse_coo_tensor1(
        out__: *mut *mut C_tensor,
        indices_: *mut C_tensor,
        values_: *mut C_tensor,
        options_kind: c_int,
        options_device: c_int,
    );
    pub fn atg_sparse_coo_tensor2(
        out__: *mut *mut C_tensor,
        indices_: *mut C_tensor,
        values_: *mut C_tensor,
        size_data: *const i64,
        size_len: c_int,
        options_kind: c_int,
        options_device: c_int,
    );
    pub fn atg_sparse_mask(out__: *mut *mut C_tensor, self_: *mut C_tensor, mask_: *mut C_tensor);
    pub fn atg_sparse_resize_(
        out__: *mut *mut C_tensor,
        self_: *mut C_tensor,
        size_data: *const i64,
        size_len: c_int,
        sparse_dim_: i64,
        dense_dim_: i64,
    );
    pub fn atg_sparse_resize_and_clear_(
        out__: *mut *mut C_tensor,
        self_: *mut C_tensor,
        size_data: *const i64,
        size_len: c_int,
        sparse_dim_: i64,
        dense_dim_: i64,
    );
    pub fn atg_split(self_: *mut C_tensor, split_size_: i64, dim_: i64) -> *mut *mut C_tensor;
    pub fn atg_split_with_sizes(
        self_: *mut C_tensor,
        split_sizes_data: *const i64,
        split_sizes_len: c_int,
        dim_: i64,
    ) -> *mut *mut C_tensor;
    pub fn atg_sqrt(out__: *mut *mut C_tensor, self_: *mut C_tensor);
    pub fn atg_sqrt_(out__: *mut *mut C_tensor, self_: *mut C_tensor);
    pub fn atg_sqrt_out(out__: *mut *mut C_tensor, out_: *mut C_tensor, self_: *mut C_tensor);
    pub fn atg_square(out__: *mut *mut C_tensor, self_: *mut C_tensor);
    pub fn atg_square_(out__: *mut *mut C_tensor, self_: *mut C_tensor);
    pub fn atg_squeeze(out__: *mut *mut C_tensor, self_: *mut C_tensor);
    pub fn atg_squeeze1(out__: *mut *mut C_tensor, self_: *mut C_tensor, dim_: i64);
    pub fn atg_squeeze_(out__: *mut *mut C_tensor, self_: *mut C_tensor);
    pub fn atg_squeeze_1(out__: *mut *mut C_tensor, self_: *mut C_tensor, dim_: i64);
    pub fn atg_sspaddmm(
        out__: *mut *mut C_tensor,
        self_: *mut C_tensor,
        mat1_: *mut C_tensor,
        mat2_: *mut C_tensor,
    );
    pub fn atg_sspaddmm_out(
        out__: *mut *mut C_tensor,
        out_: *mut C_tensor,
        self_: *mut C_tensor,
        mat1_: *mut C_tensor,
        mat2_: *mut C_tensor,
    );
    pub fn atg_stack(
        out__: *mut *mut C_tensor,
        tensors_data: *const *mut C_tensor,
        tensors_len: c_int,
        dim_: i64,
    );
    pub fn atg_stack_out(
        out__: *mut *mut C_tensor,
        out_: *mut C_tensor,
        tensors_data: *const *mut C_tensor,
        tensors_len: c_int,
        dim_: i64,
    );
    pub fn atg_std(out__: *mut *mut C_tensor, self_: *mut C_tensor, unbiased_: c_int);
    pub fn atg_std1(
        out__: *mut *mut C_tensor,
        self_: *mut C_tensor,
        dim_data: *const i64,
        dim_len: c_int,
        unbiased_: c_int,
        keepdim_: c_int,
    );
    pub fn atg_std_mean(out__: *mut *mut C_tensor, self_: *mut C_tensor, unbiased_: c_int);
    pub fn atg_std_mean1(
        out__: *mut *mut C_tensor,
        self_: *mut C_tensor,
        dim_data: *const i64,
        dim_len: c_int,
        unbiased_: c_int,
        keepdim_: c_int,
    );
    pub fn atg_std_out(
        out__: *mut *mut C_tensor,
        out_: *mut C_tensor,
        self_: *mut C_tensor,
        dim_data: *const i64,
        dim_len: c_int,
        unbiased_: c_int,
        keepdim_: c_int,
    );
    pub fn atg_stft(
        out__: *mut *mut C_tensor,
        self_: *mut C_tensor,
        n_fft_: i64,
        hop_length_v: i64,
        hop_length_null: i8,
        win_length_v: i64,
        win_length_null: i8,
        window_: *mut C_tensor,
        normalized_: c_int,
        onesided_: c_int,
        return_complex_: c_int,
    );
    pub fn atg_sub(out__: *mut *mut C_tensor, self_: *mut C_tensor, other_: *mut C_tensor);
    pub fn atg_sub1(out__: *mut *mut C_tensor, self_: *mut C_tensor, other_: *mut C_scalar);
    pub fn atg_sub_(out__: *mut *mut C_tensor, self_: *mut C_tensor, other_: *mut C_tensor);
    pub fn atg_sub_1(out__: *mut *mut C_tensor, self_: *mut C_tensor, other_: *mut C_scalar);
    pub fn atg_sub_out(
        out__: *mut *mut C_tensor,
        out_: *mut C_tensor,
        self_: *mut C_tensor,
        other_: *mut C_tensor,
    );
    pub fn atg_subtract(out__: *mut *mut C_tensor, self_: *mut C_tensor, other_: *mut C_tensor);
    pub fn atg_subtract1(out__: *mut *mut C_tensor, self_: *mut C_tensor, other_: *mut C_scalar);
    pub fn atg_subtract_(out__: *mut *mut C_tensor, self_: *mut C_tensor, other_: *mut C_tensor);
    pub fn atg_subtract_1(out__: *mut *mut C_tensor, self_: *mut C_tensor, other_: *mut C_scalar);
    pub fn atg_subtract_out(
        out__: *mut *mut C_tensor,
        out_: *mut C_tensor,
        self_: *mut C_tensor,
        other_: *mut C_tensor,
    );
    pub fn atg_sum(out__: *mut *mut C_tensor, self_: *mut C_tensor, dtype_: c_int);
    pub fn atg_sum1(
        out__: *mut *mut C_tensor,
        self_: *mut C_tensor,
        dim_data: *const i64,
        dim_len: c_int,
        keepdim_: c_int,
        dtype_: c_int,
    );
    pub fn atg_sum_out(
        out__: *mut *mut C_tensor,
        out_: *mut C_tensor,
        self_: *mut C_tensor,
        dim_data: *const i64,
        dim_len: c_int,
        keepdim_: c_int,
        dtype_: c_int,
    );
    pub fn atg_sum_to_size(
        out__: *mut *mut C_tensor,
        self_: *mut C_tensor,
        size_data: *const i64,
        size_len: c_int,
    );
    pub fn atg_svd(
        out__: *mut *mut C_tensor,
        self_: *mut C_tensor,
        some_: c_int,
        compute_uv_: c_int,
    );
    pub fn atg_svd_out(
        out__: *mut *mut C_tensor,
        U_: *mut C_tensor,
        S_: *mut C_tensor,
        V_: *mut C_tensor,
        self_: *mut C_tensor,
        some_: c_int,
        compute_uv_: c_int,
    );
    pub fn atg_swapaxes(out__: *mut *mut C_tensor, self_: *mut C_tensor, axis0_: i64, axis1_: i64);
    pub fn atg_swapaxes_(out__: *mut *mut C_tensor, self_: *mut C_tensor, axis0_: i64, axis1_: i64);
    pub fn atg_swapdims(out__: *mut *mut C_tensor, self_: *mut C_tensor, dim0_: i64, dim1_: i64);
    pub fn atg_swapdims_(out__: *mut *mut C_tensor, self_: *mut C_tensor, dim0_: i64, dim1_: i64);
    pub fn atg_symeig(
        out__: *mut *mut C_tensor,
        self_: *mut C_tensor,
        eigenvectors_: c_int,
        upper_: c_int,
    );
    pub fn atg_symeig_out(
        out__: *mut *mut C_tensor,
        e_: *mut C_tensor,
        V_: *mut C_tensor,
        self_: *mut C_tensor,
        eigenvectors_: c_int,
        upper_: c_int,
    );
    pub fn atg_t(out__: *mut *mut C_tensor, self_: *mut C_tensor);
    pub fn atg_t_(out__: *mut *mut C_tensor, self_: *mut C_tensor);
    pub fn atg_take(out__: *mut *mut C_tensor, self_: *mut C_tensor, index_: *mut C_tensor);
    pub fn atg_take_backward(
        out__: *mut *mut C_tensor,
        grad_: *mut C_tensor,
        input_: *mut C_tensor,
        index_: *mut C_tensor,
    );
    pub fn atg_take_out(
        out__: *mut *mut C_tensor,
        out_: *mut C_tensor,
        self_: *mut C_tensor,
        index_: *mut C_tensor,
    );
    pub fn atg_tan(out__: *mut *mut C_tensor, self_: *mut C_tensor);
    pub fn atg_tan_(out__: *mut *mut C_tensor, self_: *mut C_tensor);
    pub fn atg_tan_out(out__: *mut *mut C_tensor, out_: *mut C_tensor, self_: *mut C_tensor);
    pub fn atg_tanh(out__: *mut *mut C_tensor, self_: *mut C_tensor);
    pub fn atg_tanh_(out__: *mut *mut C_tensor, self_: *mut C_tensor);
    pub fn atg_tanh_backward(
        out__: *mut *mut C_tensor,
        grad_output_: *mut C_tensor,
        output_: *mut C_tensor,
    );
    pub fn atg_tanh_backward_out(
        out__: *mut *mut C_tensor,
        grad_input_: *mut C_tensor,
        grad_output_: *mut C_tensor,
        output_: *mut C_tensor,
    );
    pub fn atg_tanh_out(out__: *mut *mut C_tensor, out_: *mut C_tensor, self_: *mut C_tensor);
    pub fn atg_tensor_split(self_: *mut C_tensor, sections_: i64, dim_: i64) -> *mut *mut C_tensor;
    pub fn atg_tensor_split1(
        self_: *mut C_tensor,
        indices_data: *const i64,
        indices_len: c_int,
        dim_: i64,
    ) -> *mut *mut C_tensor;
    pub fn atg_tensor_split2(
        self_: *mut C_tensor,
        tensor_indices_or_sections_: *mut C_tensor,
        dim_: i64,
    ) -> *mut *mut C_tensor;
    pub fn atg_tensordot(
        out__: *mut *mut C_tensor,
        self_: *mut C_tensor,
        other_: *mut C_tensor,
        dims_self_data: *const i64,
        dims_self_len: c_int,
        dims_other_data: *const i64,
        dims_other_len: c_int,
    );
    pub fn atg_tensordot_out(
        out__: *mut *mut C_tensor,
        out_: *mut C_tensor,
        self_: *mut C_tensor,
        other_: *mut C_tensor,
        dims_self_data: *const i64,
        dims_self_len: c_int,
        dims_other_data: *const i64,
        dims_other_len: c_int,
    );
    pub fn atg_threshold(
        out__: *mut *mut C_tensor,
        self_: *mut C_tensor,
        threshold_: *mut C_scalar,
        value_: *mut C_scalar,
    );
    pub fn atg_threshold_(
        out__: *mut *mut C_tensor,
        self_: *mut C_tensor,
        threshold_: *mut C_scalar,
        value_: *mut C_scalar,
    );
    pub fn atg_threshold_backward(
        out__: *mut *mut C_tensor,
        grad_output_: *mut C_tensor,
        self_: *mut C_tensor,
        threshold_: *mut C_scalar,
    );
    pub fn atg_threshold_out(
        out__: *mut *mut C_tensor,
        out_: *mut C_tensor,
        self_: *mut C_tensor,
        threshold_: *mut C_scalar,
        value_: *mut C_scalar,
    );
    pub fn atg_tile(
        out__: *mut *mut C_tensor,
        self_: *mut C_tensor,
        dims_data: *const i64,
        dims_len: c_int,
    );
    pub fn atg_to(out__: *mut *mut C_tensor, self_: *mut C_tensor, device_: c_int);
    pub fn atg_to1(
        out__: *mut *mut C_tensor,
        self_: *mut C_tensor,
        options_kind: c_int,
        options_device: c_int,
        non_blocking_: c_int,
        copy_: c_int,
    );
    pub fn atg_to2(
        out__: *mut *mut C_tensor,
        self_: *mut C_tensor,
        dtype_: c_int,
        non_blocking_: c_int,
        copy_: c_int,
    );
    pub fn atg_to3(
        out__: *mut *mut C_tensor,
        self_: *mut C_tensor,
        other_: *mut C_tensor,
        non_blocking_: c_int,
        copy_: c_int,
    );
    pub fn atg_to4(
        out__: *mut *mut C_tensor,
        self_: *mut C_tensor,
        device_: c_int,
        dtype_: c_int,
        non_blocking_: c_int,
        copy_: c_int,
    );
    pub fn atg_to_dense(out__: *mut *mut C_tensor, self_: *mut C_tensor, dtype_: c_int);
    pub fn atg_to_dense_backward(
        out__: *mut *mut C_tensor,
        grad_: *mut C_tensor,
        input_: *mut C_tensor,
    );
    pub fn atg_to_mkldnn(out__: *mut *mut C_tensor, self_: *mut C_tensor, dtype_: c_int);
    pub fn atg_to_mkldnn_backward(
        out__: *mut *mut C_tensor,
        grad_: *mut C_tensor,
        input_: *mut C_tensor,
    );
    pub fn atg_to_sparse(out__: *mut *mut C_tensor, self_: *mut C_tensor);
    pub fn atg_to_sparse1(out__: *mut *mut C_tensor, self_: *mut C_tensor, sparse_dim_: i64);
    pub fn atg_topk(
        out__: *mut *mut C_tensor,
        self_: *mut C_tensor,
        k_: i64,
        dim_: i64,
        largest_: c_int,
        sorted_: c_int,
    );
    pub fn atg_topk_out(
        out__: *mut *mut C_tensor,
        values_: *mut C_tensor,
        indices_: *mut C_tensor,
        self_: *mut C_tensor,
        k_: i64,
        dim_: i64,
        largest_: c_int,
        sorted_: c_int,
    );
    pub fn atg_totype(out__: *mut *mut C_tensor, self_: *mut C_tensor, scalar_type_: c_int);
    pub fn atg_trace(out__: *mut *mut C_tensor, self_: *mut C_tensor);
    pub fn atg_trace_backward(
        out__: *mut *mut C_tensor,
        grad_: *mut C_tensor,
        sizes_data: *const i64,
        sizes_len: c_int,
    );
    pub fn atg_transpose(out__: *mut *mut C_tensor, self_: *mut C_tensor, dim0_: i64, dim1_: i64);
    pub fn atg_transpose_(out__: *mut *mut C_tensor, self_: *mut C_tensor, dim0_: i64, dim1_: i64);
    pub fn atg_trapz(out__: *mut *mut C_tensor, y_: *mut C_tensor, x_: *mut C_tensor, dim_: i64);
    pub fn atg_trapz1(out__: *mut *mut C_tensor, y_: *mut C_tensor, dx_: f64, dim_: i64);
    pub fn atg_triangular_solve(
        out__: *mut *mut C_tensor,
        self_: *mut C_tensor,
        A_: *mut C_tensor,
        upper_: c_int,
        transpose_: c_int,
        unitriangular_: c_int,
    );
    pub fn atg_triangular_solve_out(
        out__: *mut *mut C_tensor,
        X_: *mut C_tensor,
        M_: *mut C_tensor,
        self_: *mut C_tensor,
        A_: *mut C_tensor,
        upper_: c_int,
        transpose_: c_int,
        unitriangular_: c_int,
    );
    pub fn atg_tril(out__: *mut *mut C_tensor, self_: *mut C_tensor, diagonal_: i64);
    pub fn atg_tril_(out__: *mut *mut C_tensor, self_: *mut C_tensor, diagonal_: i64);
    pub fn atg_tril_indices(
        out__: *mut *mut C_tensor,
        row_: i64,
        col_: i64,
        offset_: i64,
        options_kind: c_int,
        options_device: c_int,
    );
    pub fn atg_tril_out(
        out__: *mut *mut C_tensor,
        out_: *mut C_tensor,
        self_: *mut C_tensor,
        diagonal_: i64,
    );
    pub fn atg_triplet_margin_loss(
        out__: *mut *mut C_tensor,
        anchor_: *mut C_tensor,
        positive_: *mut C_tensor,
        negative_: *mut C_tensor,
        margin_: f64,
        p_: f64,
        eps_: f64,
        swap_: c_int,
        reduction_: i64,
    );
    pub fn atg_triu(out__: *mut *mut C_tensor, self_: *mut C_tensor, diagonal_: i64);
    pub fn atg_triu_(out__: *mut *mut C_tensor, self_: *mut C_tensor, diagonal_: i64);
    pub fn atg_triu_indices(
        out__: *mut *mut C_tensor,
        row_: i64,
        col_: i64,
        offset_: i64,
        options_kind: c_int,
        options_device: c_int,
    );
    pub fn atg_triu_out(
        out__: *mut *mut C_tensor,
        out_: *mut C_tensor,
        self_: *mut C_tensor,
        diagonal_: i64,
    );
    pub fn atg_true_divide(out__: *mut *mut C_tensor, self_: *mut C_tensor, other_: *mut C_tensor);
    pub fn atg_true_divide1(out__: *mut *mut C_tensor, self_: *mut C_tensor, other_: *mut C_scalar);
    pub fn atg_true_divide_(out__: *mut *mut C_tensor, self_: *mut C_tensor, other_: *mut C_tensor);
    pub fn atg_true_divide_1(
        out__: *mut *mut C_tensor,
        self_: *mut C_tensor,
        other_: *mut C_scalar,
    );
    pub fn atg_true_divide_out(
        out__: *mut *mut C_tensor,
        out_: *mut C_tensor,
        self_: *mut C_tensor,
        other_: *mut C_tensor,
    );
    pub fn atg_trunc(out__: *mut *mut C_tensor, self_: *mut C_tensor);
    pub fn atg_trunc_(out__: *mut *mut C_tensor, self_: *mut C_tensor);
    pub fn atg_trunc_out(out__: *mut *mut C_tensor, out_: *mut C_tensor, self_: *mut C_tensor);
    pub fn atg_type_as(out__: *mut *mut C_tensor, self_: *mut C_tensor, other_: *mut C_tensor);
    pub fn atg_unbind(self_: *mut C_tensor, dim_: i64) -> *mut *mut C_tensor;
    pub fn atg_unflatten(
        out__: *mut *mut C_tensor,
        self_: *mut C_tensor,
        dim_: i64,
        sizes_data: *const i64,
        sizes_len: c_int,
    );
    pub fn atg_unfold(
        out__: *mut *mut C_tensor,
        self_: *mut C_tensor,
        dimension_: i64,
        size_: i64,
        step_: i64,
    );
    pub fn atg_unfold_backward(
        out__: *mut *mut C_tensor,
        grad_in_: *mut C_tensor,
        input_sizes_data: *const i64,
        input_sizes_len: c_int,
        dim_: i64,
        size_: i64,
        step_: i64,
    );
    pub fn atg_uniform_(out__: *mut *mut C_tensor, self_: *mut C_tensor, from_: f64, to_: f64);
    pub fn atg_unique_consecutive(
        out__: *mut *mut C_tensor,
        self_: *mut C_tensor,
        return_inverse_: c_int,
        return_counts_: c_int,
        dim_v: i64,
        dim_null: i8,
    );
    pub fn atg_unique_dim(
        out__: *mut *mut C_tensor,
        self_: *mut C_tensor,
        dim_: i64,
        sorted_: c_int,
        return_inverse_: c_int,
        return_counts_: c_int,
    );
    pub fn atg_unique_dim_consecutive(
        out__: *mut *mut C_tensor,
        self_: *mut C_tensor,
        dim_: i64,
        return_inverse_: c_int,
        return_counts_: c_int,
    );
    pub fn atg_unsafe_chunk(self_: *mut C_tensor, chunks_: i64, dim_: i64) -> *mut *mut C_tensor;
    pub fn atg_unsafe_split(
        self_: *mut C_tensor,
        split_size_: i64,
        dim_: i64,
    ) -> *mut *mut C_tensor;
    pub fn atg_unsafe_split_with_sizes(
        self_: *mut C_tensor,
        split_sizes_data: *const i64,
        split_sizes_len: c_int,
        dim_: i64,
    ) -> *mut *mut C_tensor;
    pub fn atg_unsqueeze(out__: *mut *mut C_tensor, self_: *mut C_tensor, dim_: i64);
    pub fn atg_unsqueeze_(out__: *mut *mut C_tensor, self_: *mut C_tensor, dim_: i64);
    pub fn atg_upsample_bicubic2d(
        out__: *mut *mut C_tensor,
        self_: *mut C_tensor,
        output_size_data: *const i64,
        output_size_len: c_int,
        align_corners_: c_int,
        scales_h_v: f64,
        scales_h_null: i8,
        scales_w_v: f64,
        scales_w_null: i8,
    );
    pub fn atg_upsample_bicubic2d_backward(
        out__: *mut *mut C_tensor,
        grad_output_: *mut C_tensor,
        output_size_data: *const i64,
        output_size_len: c_int,
        input_size_data: *const i64,
        input_size_len: c_int,
        align_corners_: c_int,
        scales_h_v: f64,
        scales_h_null: i8,
        scales_w_v: f64,
        scales_w_null: i8,
    );
    pub fn atg_upsample_bicubic2d_backward_out(
        out__: *mut *mut C_tensor,
        grad_input_: *mut C_tensor,
        grad_output_: *mut C_tensor,
        output_size_data: *const i64,
        output_size_len: c_int,
        input_size_data: *const i64,
        input_size_len: c_int,
        align_corners_: c_int,
        scales_h_v: f64,
        scales_h_null: i8,
        scales_w_v: f64,
        scales_w_null: i8,
    );
    pub fn atg_upsample_bicubic2d_out(
        out__: *mut *mut C_tensor,
        out_: *mut C_tensor,
        self_: *mut C_tensor,
        output_size_data: *const i64,
        output_size_len: c_int,
        align_corners_: c_int,
        scales_h_v: f64,
        scales_h_null: i8,
        scales_w_v: f64,
        scales_w_null: i8,
    );
    pub fn atg_upsample_bilinear2d(
        out__: *mut *mut C_tensor,
        self_: *mut C_tensor,
        output_size_data: *const i64,
        output_size_len: c_int,
        align_corners_: c_int,
        scales_h_v: f64,
        scales_h_null: i8,
        scales_w_v: f64,
        scales_w_null: i8,
    );
    pub fn atg_upsample_bilinear2d_backward(
        out__: *mut *mut C_tensor,
        grad_output_: *mut C_tensor,
        output_size_data: *const i64,
        output_size_len: c_int,
        input_size_data: *const i64,
        input_size_len: c_int,
        align_corners_: c_int,
        scales_h_v: f64,
        scales_h_null: i8,
        scales_w_v: f64,
        scales_w_null: i8,
    );
    pub fn atg_upsample_bilinear2d_backward_out(
        out__: *mut *mut C_tensor,
        grad_input_: *mut C_tensor,
        grad_output_: *mut C_tensor,
        output_size_data: *const i64,
        output_size_len: c_int,
        input_size_data: *const i64,
        input_size_len: c_int,
        align_corners_: c_int,
        scales_h_v: f64,
        scales_h_null: i8,
        scales_w_v: f64,
        scales_w_null: i8,
    );
    pub fn atg_upsample_bilinear2d_out(
        out__: *mut *mut C_tensor,
        out_: *mut C_tensor,
        self_: *mut C_tensor,
        output_size_data: *const i64,
        output_size_len: c_int,
        align_corners_: c_int,
        scales_h_v: f64,
        scales_h_null: i8,
        scales_w_v: f64,
        scales_w_null: i8,
    );
    pub fn atg_upsample_linear1d(
        out__: *mut *mut C_tensor,
        self_: *mut C_tensor,
        output_size_data: *const i64,
        output_size_len: c_int,
        align_corners_: c_int,
        scales_v: f64,
        scales_null: i8,
    );
    pub fn atg_upsample_linear1d_backward(
        out__: *mut *mut C_tensor,
        grad_output_: *mut C_tensor,
        output_size_data: *const i64,
        output_size_len: c_int,
        input_size_data: *const i64,
        input_size_len: c_int,
        align_corners_: c_int,
        scales_v: f64,
        scales_null: i8,
    );
    pub fn atg_upsample_linear1d_backward_out(
        out__: *mut *mut C_tensor,
        grad_input_: *mut C_tensor,
        grad_output_: *mut C_tensor,
        output_size_data: *const i64,
        output_size_len: c_int,
        input_size_data: *const i64,
        input_size_len: c_int,
        align_corners_: c_int,
        scales_v: f64,
        scales_null: i8,
    );
    pub fn atg_upsample_linear1d_out(
        out__: *mut *mut C_tensor,
        out_: *mut C_tensor,
        self_: *mut C_tensor,
        output_size_data: *const i64,
        output_size_len: c_int,
        align_corners_: c_int,
        scales_v: f64,
        scales_null: i8,
    );
    pub fn atg_upsample_nearest1d(
        out__: *mut *mut C_tensor,
        self_: *mut C_tensor,
        output_size_data: *const i64,
        output_size_len: c_int,
        scales_v: f64,
        scales_null: i8,
    );
    pub fn atg_upsample_nearest1d_backward(
        out__: *mut *mut C_tensor,
        grad_output_: *mut C_tensor,
        output_size_data: *const i64,
        output_size_len: c_int,
        input_size_data: *const i64,
        input_size_len: c_int,
        scales_v: f64,
        scales_null: i8,
    );
    pub fn atg_upsample_nearest1d_backward_out(
        out__: *mut *mut C_tensor,
        grad_input_: *mut C_tensor,
        grad_output_: *mut C_tensor,
        output_size_data: *const i64,
        output_size_len: c_int,
        input_size_data: *const i64,
        input_size_len: c_int,
        scales_v: f64,
        scales_null: i8,
    );
    pub fn atg_upsample_nearest1d_out(
        out__: *mut *mut C_tensor,
        out_: *mut C_tensor,
        self_: *mut C_tensor,
        output_size_data: *const i64,
        output_size_len: c_int,
        scales_v: f64,
        scales_null: i8,
    );
    pub fn atg_upsample_nearest2d(
        out__: *mut *mut C_tensor,
        self_: *mut C_tensor,
        output_size_data: *const i64,
        output_size_len: c_int,
        scales_h_v: f64,
        scales_h_null: i8,
        scales_w_v: f64,
        scales_w_null: i8,
    );
    pub fn atg_upsample_nearest2d_backward(
        out__: *mut *mut C_tensor,
        grad_output_: *mut C_tensor,
        output_size_data: *const i64,
        output_size_len: c_int,
        input_size_data: *const i64,
        input_size_len: c_int,
        scales_h_v: f64,
        scales_h_null: i8,
        scales_w_v: f64,
        scales_w_null: i8,
    );
    pub fn atg_upsample_nearest2d_backward_out(
        out__: *mut *mut C_tensor,
        grad_input_: *mut C_tensor,
        grad_output_: *mut C_tensor,
        output_size_data: *const i64,
        output_size_len: c_int,
        input_size_data: *const i64,
        input_size_len: c_int,
        scales_h_v: f64,
        scales_h_null: i8,
        scales_w_v: f64,
        scales_w_null: i8,
    );
    pub fn atg_upsample_nearest2d_out(
        out__: *mut *mut C_tensor,
        out_: *mut C_tensor,
        self_: *mut C_tensor,
        output_size_data: *const i64,
        output_size_len: c_int,
        scales_h_v: f64,
        scales_h_null: i8,
        scales_w_v: f64,
        scales_w_null: i8,
    );
    pub fn atg_upsample_nearest3d(
        out__: *mut *mut C_tensor,
        self_: *mut C_tensor,
        output_size_data: *const i64,
        output_size_len: c_int,
        scales_d_v: f64,
        scales_d_null: i8,
        scales_h_v: f64,
        scales_h_null: i8,
        scales_w_v: f64,
        scales_w_null: i8,
    );
    pub fn atg_upsample_nearest3d_backward(
        out__: *mut *mut C_tensor,
        grad_output_: *mut C_tensor,
        output_size_data: *const i64,
        output_size_len: c_int,
        input_size_data: *const i64,
        input_size_len: c_int,
        scales_d_v: f64,
        scales_d_null: i8,
        scales_h_v: f64,
        scales_h_null: i8,
        scales_w_v: f64,
        scales_w_null: i8,
    );
    pub fn atg_upsample_nearest3d_backward_out(
        out__: *mut *mut C_tensor,
        grad_input_: *mut C_tensor,
        grad_output_: *mut C_tensor,
        output_size_data: *const i64,
        output_size_len: c_int,
        input_size_data: *const i64,
        input_size_len: c_int,
        scales_d_v: f64,
        scales_d_null: i8,
        scales_h_v: f64,
        scales_h_null: i8,
        scales_w_v: f64,
        scales_w_null: i8,
    );
    pub fn atg_upsample_nearest3d_out(
        out__: *mut *mut C_tensor,
        out_: *mut C_tensor,
        self_: *mut C_tensor,
        output_size_data: *const i64,
        output_size_len: c_int,
        scales_d_v: f64,
        scales_d_null: i8,
        scales_h_v: f64,
        scales_h_null: i8,
        scales_w_v: f64,
        scales_w_null: i8,
    );
    pub fn atg_upsample_trilinear3d(
        out__: *mut *mut C_tensor,
        self_: *mut C_tensor,
        output_size_data: *const i64,
        output_size_len: c_int,
        align_corners_: c_int,
        scales_d_v: f64,
        scales_d_null: i8,
        scales_h_v: f64,
        scales_h_null: i8,
        scales_w_v: f64,
        scales_w_null: i8,
    );
    pub fn atg_upsample_trilinear3d_backward(
        out__: *mut *mut C_tensor,
        grad_output_: *mut C_tensor,
        output_size_data: *const i64,
        output_size_len: c_int,
        input_size_data: *const i64,
        input_size_len: c_int,
        align_corners_: c_int,
        scales_d_v: f64,
        scales_d_null: i8,
        scales_h_v: f64,
        scales_h_null: i8,
        scales_w_v: f64,
        scales_w_null: i8,
    );
    pub fn atg_upsample_trilinear3d_backward_out(
        out__: *mut *mut C_tensor,
        grad_input_: *mut C_tensor,
        grad_output_: *mut C_tensor,
        output_size_data: *const i64,
        output_size_len: c_int,
        input_size_data: *const i64,
        input_size_len: c_int,
        align_corners_: c_int,
        scales_d_v: f64,
        scales_d_null: i8,
        scales_h_v: f64,
        scales_h_null: i8,
        scales_w_v: f64,
        scales_w_null: i8,
    );
    pub fn atg_upsample_trilinear3d_out(
        out__: *mut *mut C_tensor,
        out_: *mut C_tensor,
        self_: *mut C_tensor,
        output_size_data: *const i64,
        output_size_len: c_int,
        align_corners_: c_int,
        scales_d_v: f64,
        scales_d_null: i8,
        scales_h_v: f64,
        scales_h_null: i8,
        scales_w_v: f64,
        scales_w_null: i8,
    );
    pub fn atg_value_selecting_reduction_backward(
        out__: *mut *mut C_tensor,
        grad_: *mut C_tensor,
        dim_: i64,
        indices_: *mut C_tensor,
        sizes_data: *const i64,
        sizes_len: c_int,
        keepdim_: c_int,
    );
    pub fn atg_values(out__: *mut *mut C_tensor, self_: *mut C_tensor);
    pub fn atg_vander(
        out__: *mut *mut C_tensor,
        x_: *mut C_tensor,
        n_v: i64,
        n_null: i8,
        increasing_: c_int,
    );
    pub fn atg_var(out__: *mut *mut C_tensor, self_: *mut C_tensor, unbiased_: c_int);
    pub fn atg_var1(
        out__: *mut *mut C_tensor,
        self_: *mut C_tensor,
        dim_data: *const i64,
        dim_len: c_int,
        unbiased_: c_int,
        keepdim_: c_int,
    );
    pub fn atg_var_mean(out__: *mut *mut C_tensor, self_: *mut C_tensor, unbiased_: c_int);
    pub fn atg_var_mean1(
        out__: *mut *mut C_tensor,
        self_: *mut C_tensor,
        dim_data: *const i64,
        dim_len: c_int,
        unbiased_: c_int,
        keepdim_: c_int,
    );
    pub fn atg_var_out(
        out__: *mut *mut C_tensor,
        out_: *mut C_tensor,
        self_: *mut C_tensor,
        dim_data: *const i64,
        dim_len: c_int,
        unbiased_: c_int,
        keepdim_: c_int,
    );
    pub fn atg_vdot(out__: *mut *mut C_tensor, self_: *mut C_tensor, other_: *mut C_tensor);
    pub fn atg_vdot_out(
        out__: *mut *mut C_tensor,
        out_: *mut C_tensor,
        self_: *mut C_tensor,
        other_: *mut C_tensor,
    );
    pub fn atg_view(
        out__: *mut *mut C_tensor,
        self_: *mut C_tensor,
        size_data: *const i64,
        size_len: c_int,
    );
    pub fn atg_view1(out__: *mut *mut C_tensor, self_: *mut C_tensor, dtype_: c_int);
    pub fn atg_view_as(out__: *mut *mut C_tensor, self_: *mut C_tensor, other_: *mut C_tensor);
    pub fn atg_view_as_complex(out__: *mut *mut C_tensor, self_: *mut C_tensor);
    pub fn atg_view_as_real(out__: *mut *mut C_tensor, self_: *mut C_tensor);
    pub fn atg_vstack(
        out__: *mut *mut C_tensor,
        tensors_data: *const *mut C_tensor,
        tensors_len: c_int,
    );
    pub fn atg_vstack_out(
        out__: *mut *mut C_tensor,
        out_: *mut C_tensor,
        tensors_data: *const *mut C_tensor,
        tensors_len: c_int,
    );
    pub fn atg_where(condition_: *mut C_tensor) -> *mut *mut C_tensor;
    pub fn atg_where1(
        out__: *mut *mut C_tensor,
        condition_: *mut C_tensor,
        self_: *mut C_tensor,
        other_: *mut C_tensor,
    );
    pub fn atg_where2(
        out__: *mut *mut C_tensor,
        condition_: *mut C_tensor,
        self_scalar_: *mut C_scalar,
        other_: *mut C_tensor,
    );
    pub fn atg_where3(
        out__: *mut *mut C_tensor,
        condition_: *mut C_tensor,
        self_: *mut C_tensor,
        other_: *mut C_scalar,
    );
    pub fn atg_where4(
        out__: *mut *mut C_tensor,
        condition_: *mut C_tensor,
        self_scalar_: *mut C_scalar,
        other_: *mut C_scalar,
    );
    pub fn atg_xlogy(out__: *mut *mut C_tensor, self_: *mut C_tensor, other_: *mut C_tensor);
    pub fn atg_xlogy1(
        out__: *mut *mut C_tensor,
        self_scalar_: *mut C_scalar,
        other_: *mut C_tensor,
    );
    pub fn atg_xlogy2(out__: *mut *mut C_tensor, self_: *mut C_tensor, other_: *mut C_scalar);
    pub fn atg_xlogy_(out__: *mut *mut C_tensor, self_: *mut C_tensor, other_: *mut C_tensor);
    pub fn atg_xlogy_1(out__: *mut *mut C_tensor, self_: *mut C_tensor, other_: *mut C_scalar);
    pub fn atg_xlogy_out(
        out__: *mut *mut C_tensor,
        out_: *mut C_tensor,
        self_: *mut C_tensor,
        other_: *mut C_tensor,
    );
    pub fn atg_xlogy_out1(
        out__: *mut *mut C_tensor,
        out_: *mut C_tensor,
        self_scalar_: *mut C_scalar,
        other_: *mut C_tensor,
    );
    pub fn atg_xlogy_out2(
        out__: *mut *mut C_tensor,
        out_: *mut C_tensor,
        self_: *mut C_tensor,
        other_: *mut C_scalar,
    );
    pub fn atg_zero_(out__: *mut *mut C_tensor, self_: *mut C_tensor);
    pub fn atg_zeros(
        out__: *mut *mut C_tensor,
        size_data: *const i64,
        size_len: c_int,
        options_kind: c_int,
        options_device: c_int,
    );
    pub fn atg_zeros_like(out__: *mut *mut C_tensor, self_: *mut C_tensor);
    pub fn atg_zeros_out(
        out__: *mut *mut C_tensor,
        out_: *mut C_tensor,
        size_data: *const i64,
        size_len: c_int,
    );
}
