# Supplementary material
Source: ML conference proceedings conference paper supplement (https://proceedings.neurips.cc/paper_files/paper/2021/hash/d367eef13f90793bd8121e2f675f0dc2-Abstract.html)
Supplement: Supplementary file 1 [file d367eef13f90793bd8121e2f675f0dc2-Supplemental.zip › Scallop-Supplementary-camera-ready/code/VQAR-launcher/compile_scallop.sh]

#!/usr/bin/env bash
cd VQAR_all
cd Scallop
cargo build --release
cp ./target/release/libscallop.so ../VQAR/query_process/scallop.so
