# Supplementary material
Source: ML conference proceedings conference paper supplement (https://proceedings.neurips.cc/paper_files/paper/2021/hash/d367eef13f90793bd8121e2f675f0dc2-Abstract.html)
Supplement: Supplementary file 1 [file d367eef13f90793bd8121e2f675f0dc2-Supplemental.zip › Scallop-Supplementary-camera-ready/code/VQAR-launcher/download.sh]

#!/usr/bin/env bash
mkdir VQAR_all
cd VQAR_all
wget https://zenodo.org/record/4536383/files/VQAR_code.zip
unzip VQAR_code.zip
mv VQAR_code/VQAR .
mv VQAR_code/Scallop .
rm -rf VQAR_code
rm -rf VQAR_code.zip
cd VQAR
wget https://zenodo.org/record/4535747/files/data.zip
unzip data.zip
rm -rf data.zip
