# Supplementary material
Source: ML conference proceedings conference paper supplement (https://proceedings.neurips.cc/paper_files/paper/2021/hash/d367eef13f90793bd8121e2f675f0dc2-Abstract.html)
Supplement: Supplementary file 1 [file d367eef13f90793bd8121e2f675f0dc2-Supplemental.zip › Scallop-Supplementary-camera-ready/code/VQAR-launcher/README.md]

## Prerequiste
We assume you have at least one GPU

## 1. Download
To download the resources.
```
./download.sh
```

## 2. Setup Rust
To install the rust environment.
```
./install_rust.sh
```

## 3. Setup conda environment
We assume that you have installed anaconda with python 3.7
```
./conda_env.sh
```

## 4. Build scallop
We assume you have installed Rust and Cargo successfully
```
./compile_scallop.sh
```

## 5. Run experiments
You should be able to run the experiments under `VQAR_all/VQAR`.
